# Supplementary material for: Transition from natal downs to juvenile feathers: conserved regulatory switches in Neoaves
Source: Research Square preprint supplement (doi:10.21203/rs.3.rs-3382427/v1), 2023-10-03
Supplement: Supplementary file 1 [file 0bbd5e5dc5ecc974991b3583.xlsx]

## Sheet: TPMmt1unique_coding_keratinocyt
gene_id	P3	P4	P5	P6	P7	E7	E9	E14	z-score (P, E separately)	P3	P4	P5	P6	P7	E7	E9	E14	clustering module				P3	P4	P5	P6	P7		E7	E9	E14
EDCH1	37.3592	72.3788	101.247	30.7841	89.5559	0.180232	0.0894355	720.919	EDCH1	-0.925962	0.19585	1.1206	-1.13659	0.746096	-0.577241	-0.577459	1.1547	1			CM1	-0.578175	0.421659	1.10215	-1.31815	0.37251		-0.586748	-0.567695	1.15444
EDCH5	33.3431	47.0052	61.4004	24.7225	46.1208	0.00727654	0.0302099	142.333	EDCH5	-0.652667	0.319163	1.34314	-1.26589	0.256249	-0.57749	-0.577211	1.1547	1			CM2	-1.41885	1.05072	0.593973	-0.56055	0.334707		-0.578047	-0.576653	1.1547
EDQREP	91.0353	125.018	119.838	42.7017	99.5798	0	0.0487135	157.586	EDQREP	-0.140475	0.897457	0.739252	-1.61673	0.120499	-0.577618	-0.577082	1.1547	1			CM3	-0.783446	0.0789303	1.5565	-0.0550933	-0.79689		-0.455943	-0.683598	1.13954
EDWM	177.59	218.316	267.57	85.1059	186.384	0	0.0133617	98.7743	EDWM	-0.140395	0.467661	1.20306	-1.52123	-0.00909223	-0.577467	-0.577233	1.1547	1			CM4	0.272356	0.171932	1.43084	-1.07851	-0.796619		-0.577383	-0.577318	1.1547
GG6AChr25Ktn3	228.401	296.739	344.298	227.375	324.988	6.9594	10.7789	78.8491	GG6AChr25Ktn3	-1.03138	0.228161	1.10471	-1.0503	0.7488	-0.623922	-0.529491	1.15341	1			CM5	0.696947	0.80939	-1.59329	0.0148207	0.0721359		-0.584285	-0.570334	1.15462
EDQM1	178.502	272.855	268.041	203.496	240.068	0	0.0518738	30.159	EDQM1	-1.32105	0.983342	0.865759	-0.710624	0.182575	-0.57884	-0.575859	1.1547	2			CM6	0.983016	0.837604	0.00139781	-0.831635	-0.990382		-0.553419	-0.600473	1.15389
EDQM2	211.082	399.668	383.667	294.738	347.689	0	0.0967471	85.6435	EDQM2	-1.52048	0.94533	0.736111	-0.426652	0.265693	-0.578329	-0.576371	1.1547	2			CM7	-0.841696	-0.740404	-0.468326	0.641674	1.40875		-0.56656	-0.565014	1.13157
GG6AChr25Scale19	340.287	606.664	517.578	402.567	530.603	0.185748	0.134084	284.096	GG6AChr25Scale19	-1.30521	1.19153	0.356533	-0.721466	0.478612	-0.577193	-0.577508	1.1547	2			CM8	-1.06528	-1.0764	1.058	0.544413	0.539264		0.123774	-1.05613	0.932351
GG6AChr25Scale20	174.301	392.931	337.239	270.181	336.775	0	0.0273648	49.8402	GG6AChr25Scale20	-1.52865	1.08267	0.417487	-0.383457	0.411948	-0.577826	-0.576875	1.1547	2			CM9	-0.505899	-0.50736	-0.50786	-0.257239	1.77836		-1.05194	0.938368	0.113568
GG6AChr25Ktn8	29.5359	41.6375	80.3729	52.2326	37.0146	0	0	0.234123	GG6AChr25Ktn8	-0.940632	-0.329384	1.62713	0.205772	-0.562882	-0.57735	-0.57735	1.1547	3			CM10	-1.11493	-0.486983	0.296027	-0.182187	1.48808		-0.577838	-0.576863	1.1547
GG6AChr25Ktn9	306.242	525.797	722.701	367.425	226.457	0.241688	0	1.01611	GG6AChr25Ktn9	-0.626259	0.487244	1.48587	-0.315959	-1.0309	-0.334535	-0.789845	1.12438	3			CM11	-0.539297	-0.536217	-0.533942	-0.145808	1.75526		-0.563235	-0.588855	1.15209
GG6AChr25Ktn12	0.359049	0.359295	0.384862	0.339124	0.343692	0.43874	0.383736	1030.14	GG6AChr25Ktn12	0.103028	0.116786	1.54477	-1.00986	-0.754721	-0.577304	-0.577397	1.1547	4
LOR1	183.615	173.517	224.798	108.854	123.377	0	0.0418583	326.97	LOR1	0.441685	0.227078	1.31691	-1.14716	-0.838518	-0.577461	-0.577239	1.1547	4
EDKM	157.374	158.358	142.126	152.872	149.127	5.83607	11.7129	316.786	EDKM	0.814995	0.963294	-1.48504	0.135785	-0.429035	-0.593793	-0.56075	1.15454	5
S100A9	26.157	26.8615	5.18157	19.856	26.1056	3.21423	1.3768	621.346	S100A9	0.578899	0.655486	-1.70155	-0.106143	0.573307	-0.574778	-0.579919	1.1547	5
EDSC	24.4015	35.7191	19.5673	8.85637	9.17999	0	0.202198	1336.62	EDSC	0.431438	1.43683	0.00199509	-0.949508	-0.92076	-0.577481	-0.577219	1.1547	6
GG6AChr25Ktn13	1828.83	1659.75	1177.83	705.351	950.247	0	0.393805	850.29	GG6AChr25Ktn13	1.19418	0.836436	-0.183159	-1.18279	-0.664662	-0.577751	-0.576949	1.1547	6
GG6AChr25Ktn7	4.76973	4.08288	3.85222	3.39825	3.50063	0.034778	0	0.553886	GG6AChr25Ktn7	1.54922	0.295869	-0.125036	-0.953438	-0.766615	-0.520391	-0.632494	1.15289	6
LOR3	845.943	1020.85	899.283	624.785	473.955	0	0	27.0896	LOR3	0.331302	1.12533	0.573448	-0.672681	-1.3574	-0.57735	-0.57735	1.1547	6
S100A11	883.43	819.016	765.973	756.157	696.857	592.011	543.224	1246.51	S100A11	1.40894	0.49355	-0.26026	-0.399759	-1.24248	-0.514121	-0.63835	1.15247	6
CRNN	0	0	0	0.0913767	0.0858515	0	0.372583	379.669	CRNN	-0.729706	-0.729706	-0.729706	1.15143	1.03769	-0.5782	-0.5765	1.1547	7
EDPE	9.46304	11.6811	43.8866	192.991	432.787	0.406823	1.81774	3976.06	EDPE	-0.71046	-0.698216	-0.52043	0.302674	1.62643	-0.577658	-0.577043	1.1547	7
EDQM3	266.335	777.717	1412.85	2215.3	3099.48	0.0596216	3.34919	6358.54	EDQM3	-1.13995	-0.687351	-0.125226	0.584993	1.36754	-0.577798	-0.576902	1.1547	7
EDYM1	0	0.23584	0.158783	2.45829	3.2821	0	0.0326068	1.96508	EDYM1	-0.801751	-0.647648	-0.697999	0.80455	1.34285	-0.591778	-0.562801	1.15458	7
GG6AChr10FK1	0	0	0.0673437	0.916996	1.74211	0	0	1.05891	GG6AChr10FK1	-0.704898	-0.704898	-0.617843	0.480504	1.54713	-0.57735	-0.57735	1.1547	7
GG6AChr10FK2	1.31894	0.581037	0.783739	4.53231	7.35842	0.0236911	0.993832	55.8596	GG6AChr10FK2	-0.540327	-0.790153	-0.721526	0.547598	1.50441	-0.592461	-0.562107	1.15457	7
GG6AChr10FK3	9.09436	5.17176	5.69955	34.1501	65.8131	0.313779	7.52537	402.352	GG6AChr10FK3	-0.566604	-0.715855	-0.695773	0.386743	1.59149	-0.592952	-0.561606	1.15456	7
GG6AChr10FK4	2.73057	3.02524	2.51859	27.0693	39.2081	0.0490973	1.03205	109.001	GG6AChr10FK4	-0.708721	-0.691574	-0.721055	0.707509	1.41384	-0.585181	-0.569484	1.15466	7
GG6AChr10FK5	0.947946	0.534458	1.15518	10.9604	18.8589	0	0.436411	23.5786	GG6AChr10FK5	-0.677722	-0.728273	-0.652386	0.546368	1.51201	-0.593451	-0.561098	1.15455	7
GG6AChr10FK7	0.146432	0	0.188717	1.41169	1.83383	0	0	0.242351	GG6AChr10FK7	-0.675088	-0.848607	-0.624981	0.824224	1.32445	-0.57735	-0.57735	1.1547	7
GG6AChr25Claw1	0.0766993	1.24634	7.09357	30.3522	43.7142	0	0	32.7127	GG6AChr25Claw1	-0.841389	-0.781454	-0.48183	0.709988	1.39469	-0.57735	-0.57735	1.1547	7
GG6AChr25Claw10	0	4.58532	14.9198	120.82	125.961	0	0.0210254	37.5444	GG6AChr25Claw10	-0.828571	-0.757233	-0.596451	1.05113	1.13112	-0.577835	-0.576865	1.1547	7
GG6AChr25Claw11	0	1.0466	1.43034	18.9402	25.1635	0	0	18.1505	GG6AChr25Claw11	-0.786569	-0.698203	-0.665804	0.812571	1.338	-0.57735	-0.57735	1.1547	7
GG6AChr25Claw12	0	3.62134	7.58245	45.8303	60.4441	0	0.0210926	52.9574	GG6AChr25Claw12	-0.848892	-0.718054	-0.57494	0.806948	1.33494	-0.577695	-0.577005	1.1547	7
GG6AChr25Claw13	0	3.374	9.59207	75.2927	86.807	0	0.0289532	92.3999	GG6AChr25Claw13	-0.826518	-0.746872	-0.600089	0.950837	1.22264	-0.577622	-0.577079	1.1547	7
GG6AChr25Claw2	0.0525839	1.97574	11.0205	27.2898	40.6523	0.0111877	0.0732666	324.723	GG6AChr25Claw2	-0.928002	-0.817464	-0.297598	0.637511	1.40555	-0.577516	-0.577185	1.1547	7
GG6AChr25Claw3	0	19.2668	63.1253	167.512	210.905	0	0.101726	625.158	GG6AChr25Claw3	-0.9934	-0.785725	-0.31298	0.812187	1.27992	-0.577491	-0.577209	1.1547	7
GG6AChr25Claw4	0.524274	45.9996	138.794	362.104	481.214	0	0.348432	1943.55	GG6AChr25Claw4	-0.988291	-0.769274	-0.32236	0.753136	1.32679	-0.577506	-0.577195	1.1547	7
GG6AChr25Claw5	0.0772531	4.3151	18.8464	92.761	118.469	0	0	101.059	GG6AChr25Claw5	-0.854102	-0.776788	-0.511683	0.836788	1.30579	-0.57735	-0.57735	1.1547	7
GG6AChr25Claw6	0.0604019	4.91425	19.5769	121.813	143.387	0	0.155158	278.687	GG6AChr25Claw6	-0.839636	-0.769236	-0.556568	0.926264	1.23918	-0.577832	-0.576868	1.1547	7
GG6AChr25Claw7	0.117865	7.47893	32.7639	117.37	149.406	0.00914246	0	131.283	GG6AChr25Claw7	-0.904925	-0.796276	-0.423073	0.825711	1.29856	-0.57729	-0.577411	1.1547	7
GG6AChr25Claw8	0.0359155	5.34065	17.7347	109.844	97.4251	0	0.0691062	458.662	GG6AChr25Claw8	-0.86678	-0.766909	-0.533572	1.20053	0.966727	-0.577481	-0.57722	1.1547	7
GG6AChr25Claw9	0.0776545	3.81702	11.3172	74.2979	82.7822	0	0	67.7612	GG6AChr25Claw9	-0.847757	-0.755552	-0.570613	0.982358	1.19156	-0.57735	-0.57735	1.1547	7
GG6AChr25FL1	0	0	0.658356	85.5921	185.652	0	0.741598	1684.41	GG6AChr25FL1	-0.661813	-0.661813	-0.653801	0.379846	1.59758	-0.577732	-0.576969	1.1547	7
GG6AChr25FL2	0.0422082	0.0517125	0.560003	171.746	385.377	0.0281599	2.87319	13515.1	GG6AChr25FL2	-0.655423	-0.655368	-0.65238	0.353774	1.6094	-0.577533	-0.577168	1.1547	7
GG6AChr25FL3	0.268323	0.0612329	5.69928	394.297	725.672	0	2.09422	9638.02	GG6AChr25FL3	-0.687211	-0.687844	-0.670618	0.516627	1.52905	-0.577538	-0.577162	1.1547	7
GG6AChr25Ktn1	0	0.476705	10.2594	62.0718	106.947	0.0329902	0.0158654	18.1993	GG6AChr25Ktn1	-0.76072	-0.750633	-0.543632	0.552711	1.50227	-0.576534	-0.578166	1.1547	7
GG6AChr25Ktn14	196.014	276.563	397.366	521.224	639.596	0.464756	9.72212	1755.41	GG6AChr25Ktn14	-1.17121	-0.722271	-0.0489689	0.641352	1.3011	-0.581925	-0.572764	1.15469	7
GG6AChr25Ktn2	0	0.411934	11.4702	58.3962	105.921	0	0	6.64839	GG6AChr25Ktn2	-0.762139	-0.75323	-0.514071	0.500809	1.52863	-0.57735	-0.57735	1.1547	7
GG6AChr25Scale1	0.639669	70.7855	405.25	1149.94	1838.67	0	0.0215628	138.408	GG6AChr25Scale1	-0.881031	-0.791777	-0.366206	0.58134	1.45767	-0.577485	-0.577215	1.1547	7
GG6AChr25Scale10	0.72125	40.8346	239.61	594.491	1119.32	0	0.00239838	3.08033	GG6AChr25Scale10	-0.854288	-0.768246	-0.341877	0.419331	1.54508	-0.578025	-0.576676	1.1547	7
GG6AChr25Scale11	0.303808	19.1126	124.792	350.297	563.539	0	0	4.15423	GG6AChr25Scale11	-0.876771	-0.798727	-0.360232	0.575459	1.46027	-0.57735	-0.57735	1.1547	7
GG6AChr25Scale12	0.00837178	13.8017	72.0057	175.233	297.86	0	0	0.761337	GG6AChr25Scale12	-0.895429	-0.784929	-0.31865	0.508313	1.4907	-0.57735	-0.57735	1.1547	7
GG6AChr25Scale13	0.460631	47.7992	323.12	854.966	1404.13	0	0	24.0888	GG6AChr25Scale13	-0.880545	-0.801243	-0.340026	0.550925	1.47089	-0.57735	-0.57735	1.1547	7
GG6AChr25Scale14	1.36162	114.053	758.84	1969.9	3375.91	0	0.10412	270.901	GG6AChr25Scale14	-0.871726	-0.792672	-0.340351	0.509212	1.49554	-0.577683	-0.577017	1.1547	7
GG6AChr25Scale15	0.298211	22.9107	135.717	353.712	563.909	0.00846284	0	2.96774	GG6AChr25Scale15	-0.896154	-0.801907	-0.331736	0.576855	1.45294	-0.574875	-0.579822	1.1547	7
GG6AChr25Scale16	0.448803	39.0301	219.981	563.961	917.817	0	0.0457704	258.13	GG6AChr25Scale16	-0.895054	-0.795766	-0.330092	0.555135	1.46578	-0.577504	-0.577197	1.1547	7
GG6AChr25Scale17	6.34131	148.785	224.823	408.126	460.827	0.187062	2.08527	6357.21	GG6AChr25Scale17	-1.30263	-0.540426	-0.133545	0.847301	1.1293	-0.577609	-0.577092	1.1547	7
GG6AChr25Scale18	4.33755	125.8	147.559	276.489	341.348	0	1.79781	6587.08	GG6AChr25Scale18	-1.31937	-0.402425	-0.23816	0.735162	1.2248	-0.577587	-0.577114	1.1547	7
GG6AChr25Scale2	0.774758	94.8436	426.662	995.411	1575.5	0.0452514	0	0.952091	GG6AChr25Scale2	-0.933986	-0.791788	-0.290198	0.569546	1.44643	-0.534712	-0.618963	1.15368	7
GG6AChr25Scale3	0.641319	50.7992	307.434	753.647	1334.86	0	0	23.6761	GG6AChr25Scale3	-0.874806	-0.785045	-0.325778	0.472754	1.51288	-0.57735	-0.57735	1.1547	7
GG6AChr25Scale4	1.13398	80.9554	478.108	1140.81	2041.85	0	0	5.61317	GG6AChr25Scale4	-0.877224	-0.783542	-0.317427	0.460346	1.51785	-0.57735	-0.57735	1.1547	7
GG6AChr25Scale5	0.388256	35.7359	190.604	430.467	802.755	0	0.0206188	61.1952	GG6AChr25Scale5	-0.878181	-0.771729	-0.305333	0.417034	1.53821	-0.577642	-0.577058	1.1547	7
GG6AChr25Scale6	0.46015	47.1389	258.809	603.822	1084.57	0	0.0320205	9.35949	GG6AChr25Scale6	-0.883239	-0.77978	-0.310633	0.454055	1.5196	-0.580316	-0.57438	1.1547	7
GG6AChr25Scale7	0.615721	37.9324	232.897	611.085	1061.31	0	0	24.6823	GG6AChr25Scale7	-0.868053	-0.784599	-0.348586	0.497183	1.50406	-0.57735	-0.57735	1.1547	7
GG6AChr25Scale8	1.61439	126.332	788.315	2050	3524.43	0.00731987	0.0122795	16.1267	GG6AChr25Scale8	-0.872348	-0.788434	-0.343028	0.505878	1.49793	-0.577617	-0.577084	1.1547	7
GG6AChr25Scale9	0.341461	51.7761	329.088	928.017	1579.15	0	0	18.3708	GG6AChr25Scale9	-0.861267	-0.784536	-0.370842	0.522642	1.494	-0.57735	-0.57735	1.1547	7
GG6AChr27FK56	0.220059	0.1048	0	23.3813	42.2399	0	0.0660347	174.163	GG6AChr27FK56	-0.678563	-0.684594	-0.690077	0.533264	1.51997	-0.577679	-0.577022	1.1547	7
GG6AChr27FK74	0	0	0	5.77442	12.8709	0	0	15.0315	GG6AChr27FK74	-0.655448	-0.655448	-0.655448	0.359507	1.60684	-0.57735	-0.57735	1.1547	7
GG6AChr27FK84	0	0	0	4.05469	5.27441	0	0	0	GG6AChr27FK84	-0.720111	-0.720111	-0.720111	0.844793	1.31554	0	0	0	7
GG6AChr25Ktn11	56.2268	46.8085	1854.12	1419.24	1414.88	0.0407973	0	0.0687554	GG6AChr25Ktn11	-1.06528	-1.0764	1.058	0.544413	0.539264	0.123774	-1.05613	0.932351	8
GG6AChr25FK5	0.367947	0.0937696	0	47.0423	429.131	0	1.78409	1.04475	GG6AChr25FK5	-0.505899	-0.50736	-0.50786	-0.257239	1.77836	-1.05194	0.938368	0.113568	9
EDCH2	8.28113	54.1192	134.113	111.683	259.493	0	0.0466068	303.793	EDCH2	-1.10431	-0.623398	0.21587	-0.0194639	1.5313	-0.577483	-0.577217	1.1547	10
EDCH3	7.72167	72.7241	152.543	146.192	301.651	0.0873021	0.974227	2573.97	EDCH3	-1.16917	-0.577483	0.149072	0.0912553	1.50632	-0.577649	-0.577052	1.1547	10
EDCH4	63.6403	200.408	299.125	265.353	548.548	0	1.59034	5211.19	EDCH4	-1.19445	-0.423053	0.133731	-0.056751	1.54052	-0.577615	-0.577086	1.1547	10
GG6AChr25Ktn4	28.1117	37.3762	51.3803	31.5524	60.935	0.0232363	0.0300209	4.71279	GG6AChr25Ktn4	-0.991804	-0.324	0.685436	-0.743788	1.37416	-0.578604	-0.576096	1.1547	10
EDCRP	0	0	0	2.53463	58.4135	0	0.039546	73.4685	EDCRP	-0.471311	-0.471311	-0.471311	-0.37331	1.78724	-0.577816	-0.576884	1.1547	11
EDDM	0.0354883	0.0317723	0.169812	11.7687	93.0075	0.0251868	0.139583	209.03	EDDM	-0.516827	-0.516919	-0.513516	-0.227611	1.77487	-0.577824	-0.576876	1.1547	11
EDMPN1	14.2416	12.6242	16.2567	50.8599	444.36	0.300816	1.07186	2606.84	EDMPN1	-0.494629	-0.503193	-0.483961	-0.300761	1.78254	-0.577606	-0.577094	1.1547	11
EDMTFH	0.28973	0.365018	0.387858	156.846	1189.62	0	41.9393	193055	EDMTFH	-0.518906	-0.518761	-0.518717	-0.217144	1.77353	-0.577538	-0.577162	1.1547	11
EDNC	0.0678031	0	0.0937451	1.85835	8.8629	0	0.0632087	274.102	EDNC	-0.552214	-0.569969	-0.545421	-0.0833293	1.75093	-0.57755	-0.577151	1.1547	11
EDQCM	3.63442	4.07304	8.7745	35.0187	234.727	0	0.792199	2993.99	EDQCM	-0.535812	-0.531429	-0.48444	-0.222144	1.77383	-0.577579	-0.577121	1.1547	11
EDYM2	8.91321	11.1856	13.0125	62.0266	185.968	0	0.366357	938.125	EDYM2	-0.623863	-0.593896	-0.569805	0.076557	1.71101	-0.577689	-0.577012	1.1547	11
GG6AChr10FK6	0.527623	0.144382	0	1.06157	2.89866	0.0617966	0.464635	11.4566	GG6AChr10FK6	-0.338983	-0.664722	-0.787441	0.114845	1.6763	-0.608222	-0.545918	1.15414	11
GG6AChr1FK1	0.819773	0.464219	0.14637	848.245	3307.69	0	14.5128	63684.6	GG6AChr1FK1	-0.580026	-0.580275	-0.580497	0.011712	1.72909	-0.577548	-0.577153	1.1547	11
GG6AChr25FK1	0.141685	0.146584	0	46.7047	1097.43	0	6.09018	30418.8	GG6AChr25FK1	-0.470712	-0.470702	-0.471004	-0.374893	1.78731	-0.577524	-0.577177	1.1547	11
GG6AChr25FK10	1.02611	0.117172	0.168232	524.073	2127.85	0.0170433	10.4911	36731.7	GG6AChr25FK10	-0.574923	-0.575909	-0.575854	-0.00713509	1.73382	-0.577597	-0.577103	1.1547	11
GG6AChr25FK12	6.56892	2.25942	1.10456	565.439	2222.92	0.803994	8.67483	30222.6	GG6AChr25FK12	-0.57546	-0.579943	-0.581145	0.0060143	1.73053	-0.577576	-0.577125	1.1547	11
GG6AChr25FK13	2.2861	1.36668	2.37316	387.651	1752.81	1.0995	15.5808	51081	GG6AChr25FK13	-0.562985	-0.564197	-0.56287	-0.0549089	1.74496	-0.577596	-0.577105	1.1547	11
GG6AChr25FK2	0.291653	0.0648522	0	43.972	812.102	0	7.31478	24910.7	GG6AChr25FK2	-0.476666	-0.477298	-0.477479	-0.354902	1.78635	-0.577605	-0.577096	1.1547	11
GG6AChr25FK3	0	0	0	5.62293	102.864	0	1.80619	1256.4	GG6AChr25FK3	-0.477508	-0.477508	-0.477508	-0.35376	1.78628	-0.578596	-0.576104	1.1547	11
GG6AChr25FK4	0.615478	0.309508	0.196962	156.734	1228.7	0	8.52103	23649	GG6AChr25FK4	-0.516093	-0.516664	-0.516874	-0.224902	1.77453	-0.577662	-0.577038	1.1547	11
GG6AChr25FK6	0.105309	0.064103	0	62.2535	366.384	0	1.12215	3378.53	GG6AChr25FK6	-0.538149	-0.538408	-0.538811	-0.147693	1.76306	-0.577638	-0.577063	1.1547	11
GG6AChr25FK7	0.751734	0.126552	0	311.51	2023.27	0	11.1939	40821.5	GG6AChr25FK7	-0.529806	-0.530516	-0.53066	-0.176786	1.76777	-0.577588	-0.577113	1.1547	11
GG6AChr25FK8	0.910729	0.202215	0.229084	383.022	1908.94	0	11.5857	44918.8	GG6AChr25FK8	-0.553184	-0.55404	-0.554008	-0.0914077	1.75264	-0.577574	-0.577127	1.1547	11
GG6AChr25FK9	0.665724	0.0657009	0.158329	406.778	1781.06	0	4.84881	11749.4	GG6AChr25FK9	-0.566689	-0.567467	-0.567346	-0.0401506	1.74165	-0.577708	-0.576993	1.1547	11
GG6AChr25FL4	0	0.0415543	0	12.5733	47.1099	0.0446659	0.195464	1023.89	GG6AChr25FL4	-0.585646	-0.583608	-0.585646	0.0308081	1.72409	-0.577478	-0.577223	1.1547	11
GG6AChr27FK1	0	0.0909108	0.0979215	0.478805	3.12989	0	0	11.1605	GG6AChr27FK1	-0.567718	-0.499763	-0.494523	-0.209819	1.77182	-0.57735	-0.57735	1.1547	11
GG6AChr27FK10	0.051246	0.0638966	0.0613507	15.5959	72.4841	0.167761	0.0562104	29.3389	GG6AChr27FK10	-0.560831	-0.560427	-0.560509	-0.0654971	1.74726	-0.574042	-0.580652	1.15469	11
GG6AChr27FK12	0.118926	0.315231	0.0394374	2.39781	16.5948	0.659327	0.120291	12.2428	GG6AChr27FK12	-0.526622	-0.499232	-0.537713	-0.208654	1.77222	-0.537549	-0.616257	1.15381	11
GG6AChr27FK13	0.0875108	0.0634312	0.0687174	20.3721	90.4697	0.340633	0.0895533	53.4053	GG6AChr27FK13	-0.565037	-0.565652	-0.565517	-0.0469965	1.7432	-0.573257	-0.581433	1.15469	11
GG6AChr27FK14	0.185407	0.675197	0.267058	36.1058	224.845	0.168651	0.277425	20.6086	GG6AChr27FK14	-0.53501	-0.529993	-0.534174	-0.167067	1.76624	-0.581965	-0.572723	1.15469	11
GG6AChr27FK15	0.011715	0.0479989	0.0212088	5.21897	27.8895	0.0558855	0.0430195	30.1824	GG6AChr27FK15	-0.54803	-0.545029	-0.547245	-0.117353	1.75766	-0.57698	-0.57772	1.1547	11
GG6AChr27FK16	1.62439	5.0046	2.45284	6.1008	57.8921	0.0192072	0	19.9272	GG6AChr27FK16	-0.535445	-0.396119	-0.501298	-0.350936	1.7838	-0.576515	-0.578185	1.1547	11
GG6AChr27FK18	0.042232	0.00628366	0.0729273	1.00611	10.0396	0	0	0.417207	GG6AChr27FK18	-0.499837	-0.508037	-0.492835	-0.279965	1.78067	-0.57735	-0.57735	1.1547	11
GG6AChr27FK19	0.0168728	0.0530749	0.0329953	8.98824	43.632	0.0180613	0.0691312	142.497	GG6AChr27FK19	-0.557072	-0.555156	-0.556219	-0.082356	1.7508	-0.577661	-0.57704	1.1547	11
GG6AChr27FK2	0.0378428	0.0363182	0.124468	52.5443	149.979	0.370478	0.124457	304.656	GG6AChr27FK2	-0.620696	-0.62072	-0.619369	0.18388	1.67691	-0.57665	-0.57805	1.1547	11
GG6AChr27FK20	0.0754587	0.445974	0.21975	1.0066	8.24784	0	0	1.9212	GG6AChr27FK20	-0.547886	-0.442358	-0.50679	-0.282684	1.77972	-0.57735	-0.57735	1.1547	11
GG6AChr27FK22	0.0258087	0.0544965	0.065469	7.06108	65.2225	0.0920558	0.0551658	29.8487	GG6AChr27FK22	-0.506931	-0.505925	-0.505541	-0.260293	1.77869	-0.576277	-0.578423	1.1547	11
GG6AChr27FK23	0.0646828	0.184009	0.282171	59.5208	159.668	0.00253702	0.0565172	163.461	GG6AChr27FK23	-0.630372	-0.628657	-0.627247	0.223777	1.6625	-0.577636	-0.577064	1.1547	11
GG6AChr27FK24	0.136856	0.244654	0.162529	65.0938	320.969	0.0867633	0.268858	529.978	GG6AChr27FK24	-0.554992	-0.554217	-0.554807	-0.087922	1.75194	-0.577648	-0.577053	1.1547	11
GG6AChr27FK25	0.258295	0.502919	0.312371	9.26698	49.3738	0	0.0356635	47.4957	GG6AChr27FK25	-0.549155	-0.537658	-0.546614	-0.125762	1.75919	-0.578001	-0.5767	1.1547	11
GG6AChr27FK26	0.13117	0.0947196	0.137909	19.297	88.161	1.06038	0.486189	292.156	GG6AChr27FK26	-0.561911	-0.562867	-0.561734	-0.0594432	1.74595	-0.575643	-0.579056	1.1547	11
GG6AChr27FK27	2.42706	2.50512	1.52723	13.7331	98.5416	0.00776915	0.0538313	145.43	GG6AChr27FK27	-0.506253	-0.504399	-0.52762	-0.237783	1.77605	-0.577625	-0.577076	1.1547	11
GG6AChr27FK28	0.113973	0.047981	0.0436385	71.9045	304.682	0.102802	0.271671	914.789	GG6AChr27FK28	-0.570398	-0.570899	-0.570932	-0.0261824	1.73841	-0.57751	-0.57719	1.1547	11
GG6AChr27FK29	0.238952	0.144959	0.126698	12.3731	116.546	0.03944	0.0215182	130.481	GG6AChr27FK29	-0.503324	-0.505168	-0.505527	-0.265191	1.77921	-0.577231	-0.577469	1.1547	11
GG6AChr27FK3	0.154997	0.0943777	0.16366	30.4564	124.858	0.994369	0.326776	161.476	GG6AChr27FK3	-0.573825	-0.574947	-0.573664	-0.0127602	1.7352	-0.573751	-0.580942	1.15469	11
GG6AChr27FK30	0.0945287	0.118517	0.158239	58.9726	303.538	0.246695	0.281035	478.445	GG6AChr27FK30	-0.550765	-0.550583	-0.550281	-0.10337	1.755	-0.577412	-0.577288	1.1547	11
GG6AChr27FK31	0.10328	0.127966	0.210743	26.6293	170.925	0.356594	0.99803	148.957	GG6AChr27FK31	-0.531549	-0.531217	-0.530103	-0.174554	1.76742	-0.581092	-0.5736	1.15469	11
GG6AChr27FK32	0.792808	0.977927	0.453826	12.4842	129.568	0	0.0210212	78.9993	GG6AChr27FK32	-0.496423	-0.493148	-0.502419	-0.289604	1.78159	-0.577581	-0.57712	1.1547	11
GG6AChr27FK33	1.6842	3.30615	1.23791	7.58406	40.644	0	0.0258899	35.6598	GG6AChr27FK33	-0.547387	-0.450957	-0.57392	-0.196623	1.76889	-0.577979	-0.576721	1.1547	11
GG6AChr27FK34	0.0857238	0.112762	0.191351	32.604	155.764	1.47542	0.632821	342.739	GG6AChr27FK34	-0.558402	-0.558001	-0.556836	-0.0763136	1.74955	-0.575213	-0.579485	1.1547	11
GG6AChr27FK35	1.83888	3.95909	1.58486	10.0527	88.1856	0.00295486	0	31.1627	GG6AChr27FK35	-0.512314	-0.455991	-0.519062	-0.294115	1.78148	-0.577268	-0.577432	1.1547	11
GG6AChr27FK36	0.0766666	0.101503	0.151934	28.3022	122.708	1.0377	0.577168	266.104	GG6AChr27FK36	-0.568599	-0.568132	-0.567182	-0.0370219	1.74094	-0.575846	-0.578853	1.1547	11
GG6AChr27FK38	0.192864	0.657363	0.441846	11.9333	90.4767	0.00223564	0	54.8324	GG6AChr27FK38	-0.522825	-0.511006	-0.51649	-0.224094	1.77441	-0.577315	-0.577386	1.1547	11
GG6AChr27FK39	0.149561	0.169284	0.21709	47.0758	206.92	0.0342087	0.184586	658.315	GG6AChr27FK39	-0.566816	-0.566596	-0.566062	-0.0427766	1.74225	-0.577548	-0.577152	1.1547	11
GG6AChr27FK40	0.392469	0.234371	0.225352	10.9512	117.94	0	0	63.1105	GG6AChr27FK40	-0.494971	-0.498033	-0.498207	-0.29047	1.78168	-0.57735	-0.57735	1.1547	11
GG6AChr27FK41	0.164879	0.273762	0.438748	74.6174	379.076	0.100798	0.260808	981.229	GG6AChr27FK41	-0.552437	-0.551774	-0.55077	-0.0992061	1.75419	-0.577492	-0.577209	1.1547	11
GG6AChr27FK42	0.310137	0.160885	0.301447	69.0862	412.725	0.0429777	0.415489	903.63	GG6AChr27FK42	-0.536685	-0.537518	-0.536734	-0.15302	1.76396	-0.577707	-0.576993	1.1547	11
GG6AChr27FK43	0.251637	0.0322133	0.0180302	38.172	262.336	0.228815	0.513259	937.767	GG6AChr27FK43	-0.524541	-0.526462	-0.526586	-0.192532	1.77012	-0.577613	-0.577087	1.1547	11
GG6AChr27FK44	0.364603	0.600155	0.217887	8.62215	58.5743	0.00227761	0.0210212	59.8238	GG6AChr27FK44	-0.525077	-0.515785	-0.530864	-0.199348	1.77107	-0.577622	-0.577079	1.1547	11
GG6AChr27FK45	0	0.0906005	0.0377433	9.625	65.5248	0	0.0152093	145.629	GG6AChr27FK45	-0.52796	-0.524783	-0.526636	-0.190437	1.76982	-0.577441	-0.57726	1.1547	11
GG6AChr27FK46	0.238451	0.108998	0	82.2294	487.554	0.0421606	0.456803	1460.06	GG6AChr27FK46	-0.537206	-0.537817	-0.538331	-0.150117	1.76347	-0.577596	-0.577104	1.1547	11
GG6AChr27FK47	0.117046	0.291742	0.258768	11.9348	105.119	0.0174637	0	93.883	GG6AChr27FK47	-0.510588	-0.50678	-0.507499	-0.253024	1.77789	-0.577189	-0.577511	1.1547	11
GG6AChr27FK48	0.106231	0.00505974	0	18.8736	121.133	0	0.0379085	160.025	GG6AChr27FK48	-0.529892	-0.531812	-0.531908	-0.173674	1.76729	-0.577555	-0.577145	1.1547	11
GG6AChr27FK49	0.0204298	0.190421	0.238022	39.0053	260.846	0	0.31188	429.595	GG6AChr27FK49	-0.528998	-0.527501	-0.527081	-0.185509	1.76909	-0.577979	-0.576721	1.1547	11
GG6AChr27FK50	0	0	0	0.890266	5.81902	0	0.194111	7.99603	GG6AChr27FK50	-0.529891	-0.529891	-0.529891	-0.178331	1.76801	-0.598497	-0.555942	1.15444	11
GG6AChr27FK51	0	0	0	0.206761	1.59182	0	0.00589241	3.18212	GG6AChr27FK51	-0.517904	-0.517904	-0.517904	-0.220218	1.77393	-0.578955	-0.575744	1.1547	11
GG6AChr27FK52	0.180914	0	0.0404393	19.6033	186.5	0	0.031945	220.47	GG6AChr27FK52	-0.503307	-0.505524	-0.505028	-0.265369	1.77923	-0.577476	-0.577225	1.1547	11
GG6AChr27FK53	0.132826	0.0591296	0.201644	27.9661	260.166	0	0.0797792	464.423	GG6AChr27FK53	-0.505823	-0.506471	-0.505218	-0.261284	1.7788	-0.577499	-0.577201	1.1547	11
GG6AChr27FK54	0.169707	0	0.383557	47.2138	204.33	0	0.689001	1111.98	GG6AChr27FK54	-0.568333	-0.570253	-0.565915	-0.0362565	1.74076	-0.577887	-0.576813	1.1547	11
GG6AChr27FK55	0.0443951	0	0	149.768	434.175	0	0.335578	1408.31	GG6AChr27FK55	-0.618074	-0.618309	-0.618309	0.174541	1.68015	-0.577557	-0.577144	1.1547	11
GG6AChr27FK57	0.0196764	0	0	34.9383	204.268	0	0.0772338	288.21	GG6AChr27FK57	-0.53893	-0.539152	-0.539152	-0.145444	1.76268	-0.577582	-0.577118	1.1547	11
GG6AChr27FK58	0	0	0	25.0226	110.6	0	0.0405521	150.903	GG6AChr27FK58	-0.566208	-0.566208	-0.566208	-0.043875	1.7425	-0.577583	-0.577117	1.1547	11
GG6AChr27FK59	0.152939	0	0	51.8908	303.398	0	0.22065	523.276	GG6AChr27FK59	-0.538242	-0.539403	-0.539403	-0.145667	1.76272	-0.577715	-0.576985	1.1547	11
GG6AChr27FK60	0	0.0367602	0	90.4795	469.527	0	0.220909	695.473	GG6AChr27FK60	-0.549974	-0.549793	-0.549974	-0.105711	1.75545	-0.577625	-0.577075	1.1547	11
GG6AChr27FK61	0	0	0	12.8359	56.9583	0	0	149.703	GG6AChr27FK61	-0.565785	-0.565785	-0.565785	-0.0455147	1.74287	-0.57735	-0.57735	1.1547	11
GG6AChr27FK62	0.0271837	0	0.00351076	34.9544	137.711	0	0.0915091	245.389	GG6AChr27FK62	-0.578802	-0.579258	-0.579199	0.00696345	1.7303	-0.577673	-0.577027	1.1547	11
GG6AChr27FK63	0	0	0	57.6579	327.342	0	0.156598	387.067	GG6AChr27FK63	-0.541662	-0.541662	-0.541662	-0.136063	1.76105	-0.577701	-0.577	1.1547	11
GG6AChr27FK64	0.337895	0	0.0360081	86.4666	507.515	0	0.172019	447.794	GG6AChr27FK64	-0.537683	-0.539215	-0.539052	-0.146991	1.76294	-0.577683	-0.577017	1.1547	11
GG6AChr27FK65	0.271279	0.0194725	0	76.3964	487.227	0	0.0686009	354.129	GG6AChr27FK65	-0.530935	-0.532123	-0.532215	-0.171705	1.76698	-0.577518	-0.577182	1.1547	11
GG6AChr27FK66	0	0	0	25.7724	128.761	0	0	27.718	GG6AChr27FK66	-0.553596	-0.553596	-0.553596	-0.0919651	1.75275	-0.57735	-0.57735	1.1547	11
GG6AChr27FK67	0	0	0	8.524	54.3117	0	0	122.615	GG6AChr27FK67	-0.53192	-0.53192	-0.53192	-0.171131	1.76689	-0.57735	-0.57735	1.1547	11
GG6AChr27FK68	0	0	0	11.4529	47.7658	0	0	77.0618	GG6AChr27FK68	-0.572595	-0.572595	-0.572595	-0.0188938	1.73668	-0.57735	-0.57735	1.1547	11
GG6AChr27FK7	0	0	0.11101	0.0962138	8.44895	0.237709	0.0122266	0.772193	GG6AChr27FK7	-0.460965	-0.460965	-0.431407	-0.435346	1.78868	-0.263892	-0.841589	1.10548	11
GG6AChr27FK70	0	0	0.0516296	41.2038	112.996	0	0.038471	111.674	GG6AChr27FK70	-0.626243	-0.626243	-0.625195	0.210167	1.66751	-0.577649	-0.577052	1.1547	11
GG6AChr27FK71	0	0.0325115	0.0983724	36.0544	141.568	0	0	51.052	GG6AChr27FK71	-0.580111	-0.57958	-0.578506	0.00821934	1.72998	-0.57735	-0.57735	1.1547	11
GG6AChr27FK72	0	0	0	19.1854	59.2254	0	0	53.4947	GG6AChr27FK72	-0.609726	-0.609726	-0.609726	0.136207	1.69297	-0.57735	-0.57735	1.1547	11
GG6AChr27FK73	0	0	0.0361037	32.1581	134.314	0	0	84.2196	GG6AChr27FK73	-0.572607	-0.572607	-0.571986	-0.0196631	1.73686	-0.57735	-0.57735	1.1547	11
GG6AChr27FK75	0	0	0	27.0834	111.02	0	0	54.699	GG6AChr27FK75	-0.574545	-0.574545	-0.574545	-0.0111749	1.73481	-0.57735	-0.57735	1.1547	11
GG6AChr27FK76	0	0	0	12.7354	36.9724	0	0	45.5118	GG6AChr27FK76	-0.618044	-0.618044	-0.618044	0.173688	1.68044	-0.57735	-0.57735	1.1547	11
GG6AChr27FK77	0	0	0	31.644	146.688	0	0	34.7018	GG6AChr27FK77	-0.561167	-0.561167	-0.561167	-0.0632871	1.74679	-0.57735	-0.57735	1.1547	11
GG6AChr27FK78	0.178126	0	0	124.173	571.955	0	0.177368	691.023	GG6AChr27FK78	-0.561313	-0.562032	-0.562032	-0.0608926	1.74627	-0.577573	-0.577128	1.1547	11
GG6AChr27FK79	0.299304	0	0	168.125	875.429	0	0.124503	1539.74	GG6AChr27FK79	-0.549029	-0.549817	-0.549817	-0.107044	1.75571	-0.57742	-0.57728	1.1547	11
GG6AChr27FK8	0.159278	0.104437	0.628492	0.348037	88.1891	0.147589	0.312977	695.813	GG6AChr27FK8	-0.451044	-0.45244	-0.439105	-0.446241	1.78883	-0.577556	-0.577144	1.1547	11
GG6AChr27FK81	0	0	0	75.0264	374.17	0	0.0892112	727.112	GG6AChr27FK81	-0.553771	-0.553771	-0.553771	-0.0913073	1.75262	-0.577457	-0.577244	1.1547	11
GG6AChr27FK82	0	0	0	29.548	339.815	0	0	154.22	GG6AChr27FK82	-0.495072	-0.495072	-0.495072	-0.29705	1.78227	-0.57735	-0.57735	1.1547	11
GG6AChr27FK83	0	0.128149	0.0717101	133.373	702.817	0	0.207381	1355.87	GG6AChr27FK83	-0.548651	-0.548231	-0.548416	-0.111203	1.7565	-0.577483	-0.577218	1.1547	11
GG6AChr27FK85	0.128153	0.191195	0.101244	126.478	570.567	0	0.463403	2478.46	GG6AChr27FK85	-0.563981	-0.563726	-0.56409	-0.0526696	1.74447	-0.577512	-0.577188	1.1547	11
GG6AChr27FK9	0.725416	0.402701	1.08093	0.760646	4.79236	0.061124	0.047026	2.88164	GG6AChr27FK9	-0.452643	-0.629277	-0.258058	-0.433361	1.77334	-0.573027	-0.581663	1.15469	11
GG6AChr2FK1	0.464839	0.471232	0.450197	0.553901	2.55895	0.728197	0.165648	1.23844	GG6AChr2FK1	-0.468551	-0.461664	-0.484322	-0.372616	1.78715	0.03249	-1.01585	0.983359	11
GG6AChr2FK3	0.11563	0.117794	0.317737	0.286132	1.60447	0.543667	0.319485	1.77697	GG6AChr2FK3	-0.590814	-0.587382	-0.270447	-0.320546	1.76919	-0.428605	-0.714257	1.14286	11
GG6AChr2FK5	0.245802	0.652546	0.368005	0.216635	2.19144	0.514082	0.117945	2.11449	GG6AChr2FK5	-0.587648	-0.098933	-0.440817	-0.622692	1.75009	-0.37975	-0.754499	1.13425	11
GG6AChr2FK6	0.209253	0.14325	0.238838	0.295205	1.15838	0.4662	0.10114	2.63128	GG6AChr2FK6	-0.472748	-0.628971	-0.402723	-0.269308	1.77375	-0.438721	-0.705649	1.14437	11
GG6AChr2FK7	0.15779	0.132083	0.137554	0.162477	1.00566	0.203837	0.170863	0.809977	GG6AChr2FK7	-0.420103	-0.487045	-0.4728	-0.407896	1.78784	-0.530929	-0.622559	1.15349	11
GG6AChr7FK	0.0442308	0	0	13.5885	129.684	0	0	0.557807	GG6AChr7FK	-0.504059	-0.504838	-0.504838	-0.265508	1.77924	-0.57735	-0.57735	1.1547	11
KRTAP9-1L	0.480048	2.36037	8.97673	88.2655	284.038	0	0.0520784	458.65	KRTAP9-1L	-0.628368	-0.612891	-0.558434	0.094171	1.70552	-0.577449	-0.577252	1.1547	11
SCFN	0.0718574	0.120053	0.189847	2.68994	28.035	0.0143611	0.511717	634.692	SCFN	-0.502217	-0.498281	-0.492581	-0.288403	1.78148	-0.578029	-0.576671	1.1547	11
