# Supplementary material for: Transition from natal downs to juvenile feathers: conserved regulatory switches in Neoaves
Source: Research Square preprint supplement (doi:10.21203/rs.3.rs-3382427/v1), 2023-10-03
Supplement: Supplementary file 2 [file 4f0c801ef8e60ceead4b97ef.xlsx]

## Sheet: embryonic
gene_id	Embryonic.TO.GCN.level	Posthatch.TO.GCN.level	difference	abs.diff.	region	ref
BCL6	8	5	3	3	multiple	Bhattacharjee
FOXO1	8	5	3	3	FK	Bhattacharjee
KLF15	8	3	5	5	FK	Bhattacharjee
MAFF	8	4	4	4	FK	Bhattacharjee
CEBPB	9	4	5	5	FK	Bhattacharjee
ID1	9	0	-10	10	FK	Bhattacharjee
MTF1	9	4	5	5	FK	Bhattacharjee
ELF1	10	3	7	7	FK	Bhattacharjee
SP2	9	4	5	5	FK	both
BACH1	8	4	4	4	NA	NA
CLOCK	8	4	4	4	NA	NA
EMX1	8	0	-10	10	NA	NA
FOXB1	8	0	-10	10	NA	NA
FOXO4	8	4	4	4	NA	NA
GATA2	8	3	5	5	NA	NA
HBP1	8	5	3	3	NA	NA
HIC1	8	3	5	5	NA	NA
HIVEP2	8	4	4	4	NA	NA
HOPX	8	4	4	4	NA	NA
IKZF2	8	5	3	3	NA	NA
LHX9	8	3	5	5	NA	NA
MEF2D	8	5	3	3	NA	NA
MSC	8	3	5	5	NA	NA
MXD4	8	4	4	4	NA	NA
MXI1	8	5	3	3	NA	NA
NFE2L1	8	4	4	4	NA	NA
NR2F6	8	3	5	5	NA	NA
NR4A2	8	3	5	5	NA	NA
NR4A3	8	4	4	4	NA	NA
STAT1	8	5	3	3	NA	NA
ZBTB32	8	4	4	4	NA	NA
ZFP36L2	8	4	4	4	NA	NA
ZHX2	8	5	3	3	NA	NA
ZNF706	8	3	5	5	NA	NA
AFF1	9	2	7	7	NA	NA
ARNTL	9	6	3	3	NA	NA
ATF4	9	5	4	4	NA	NA
CEBPA	9	4	5	5	NA	NA
CEBPD	9	4	5	5	NA	NA
CREBL2	9	5	4	4	NA	NA
EGR3	9	4	5	5	NA	NA
GCM1	9	3	6	6	NA	NA
GLMP	9	5	4	4	NA	NA
JUND	9	2	7	7	NA	NA
LHX8	9	4	5	5	NA	NA
MAFK	9	3	6	6	NA	NA
MAX	9	5	4	4	NA	NA
NCOR2	9	4	5	5	NA	NA
NR1D2	9	5	4	4	NA	NA
NR4A1	9	3	6	6	NA	NA
PPARA	9	5	4	4	NA	NA
PPARG	9	5	4	4	NA	NA
REL	9	4	5	5	NA	NA
SP1	9	4	5	5	NA	NA
THRA	9	2	7	7	NA	NA
YBX3	9	2	7	7	NA	NA
ATF3	10	3	7	7	NA	NA
CAMTA1	10	5	5	5	NA	NA
CARHSP1	10	3	7	7	NA	NA
CDIP1	10	3	7	7	NA	NA
CEBPG	10	5	5	5	NA	NA
NFE2L2	10	2	8	8	NA	NA
PIAS1	10	3	7	7	NA	NA
RARA	10	6	4	4	NA	NA
STAT6	10	4	6	6	NA	NA
TBX1	10	7	3	3	NA	NA
ZBTB21	10	4	6	6	NA	NA
ZBTB7A	10	4	6	6	NA	NA
ZFP92	10	0	-10	10	NA	NA
JDP2	11	3	8	8	NA	NA
KLF10	11	4	7	7	NA	NA
TEF	11	4	7	7	NA	NA
TFB1M	11	7	4	4	NA	NA
ZNF276	11	7	4	4	NA	NA

## Sheet: juvenile
gene_id	Embryonic.TO.GCN.level	Posthatch.TO.GCN.level	difference	abs.diff.	region	ref
BATF3	1	8	-7	7	FK	Bhattacharjee
GLI1	6	10	-4	4	unkown	Bhattacharjee
PATZ1	5	10	-5	5	Scale	Bhattacharjee
UBP1	5	10	-5	5	FK	Bhattacharjee
RUNX2	6	10	-4	4	scale	LiangYC
SIX1	7	10	-3	3	scale	LiangYC
ZIC1	3	9	-6	6	FK	LiangYC
ZIC3	4	10	-6	6	FK	LiangYC
AEBP2	3	9	-6	6	NA	NA
AFF4	0	8	10	10	NA	NA
ALX4	5	10	-5	5	NA	NA
ARID2	5	8	-3	3	NA	NA
ARID4A	4	8	-4	4	NA	NA
ARID4B	6	10	-4	4	NA	NA
BCLAF1	5	8	-3	3	NA	NA
BHLHE41	5	10	-5	5	NA	NA
BNC1	1	10	-9	9	NA	NA
CAPN15	3	9	-6	6	NA	NA
CASZ1	6	10	-4	4	NA	NA
CDC5L	5	10	-5	5	NA	NA
CPEB1	5	10	-5	5	NA	NA
CSDE1	6	10	-4	4	NA	NA
CSRNP2	6	9	-3	3	NA	NA
CTCF	5	9	-4	4	NA	NA
DNAJC2	5	10	-5	5	NA	NA
E2F3	5	10	-5	5	NA	NA
E2F7	4	10	-6	6	NA	NA
EGR4	7	10	-3	3	NA	NA
ETV4	5	8	-3	3	NA	NA
FOXJ1	6	9	-3	3	NA	NA
FUBP3	5	8	-3	3	NA	NA
GATA6	6	10	-4	4	NA	NA
GLI2	5	10	-5	5	NA	NA
GLIS1	5	9	-4	4	NA	NA
GTF2IRD1	7	10	-3	3	NA	NA
HES5	5	10	-5	5	NA	NA
HEY2	5	9	-4	4	NA	NA
HIF1A	4	10	-6	6	NA	NA
HMG20A	4	9	-5	5	NA	NA
HMGA1	0	9	10	10	NA	NA
HMGA2	1	9	-8	8	NA	NA
HMGB1	4	8	-4	4	NA	NA
HMGB2	3	9	-6	6	NA	NA
HMGB3	4	8	-4	4	NA	NA
HOXA10	3	8	-5	5	NA	NA
HOXA11	2	9	-7	7	NA	NA
HOXA9	4	9	-5	5	NA	NA
HOXB3	4	8	-4	4	NA	NA
HOXC11	4	8	-4	4	NA	NA
HOXD11	1	9	-8	8	NA	NA
IKZF1	3	8	-5	5	NA	NA
IRF4	5	9	-4	4	NA	NA
JARID2	6	10	-4	4	NA	NA
KIAA1549	6	9	-3	3	NA	NA
LEF1	7	10	-3	3	NA	NA
LIN28B	7	11	-4	4	NA	NA
LITAF	5	8	-3	3	NA	NA
LYAR	6	10	-4	4	NA	NA
MAFB	6	9	-3	3	NA	NA
MBD3	3	10	-7	7	NA	NA
MLLT10	7	10	-3	3	NA	NA
MTA1	5	10	-5	5	NA	NA
MTA3	0	10	10	10	NA	NA
MYCN	7	10	-3	3	NA	NA
MYEF2	5	10	-5	5	NA	NA
MYNN	4	10	-6	6	NA	NA
NCOR1	6	9	-3	3	NA	NA
NFRKB	6	10	-4	4	NA	NA
NFX1	7	10	-3	3	NA	NA
NFXL1	7	10	-3	3	NA	NA
NFYA	2	8	-6	6	NA	NA
NKRF	6	9	-3	3	NA	NA
NKX6-1	1	9	-8	8	NA	NA
NR3C2	5	9	-4	4	NA	NA
NRF1	4	8	-4	4	NA	NA
ONECUT1	2	10	-8	8	NA	NA
PAXBP1	5	10	-5	5	NA	NA
PBRM1	5	10	-5	5	NA	NA
PBX4	5	8	-3	3	NA	NA
PHB	4	10	-6	6	NA	NA
PHTF1	5	10	-5	5	NA	NA
PLAGL2	5	10	-5	5	NA	NA
PMS1	2	9	-7	7	NA	NA
PURG	3	10	-7	7	NA	NA
RCOR1	5	10	-5	5	NA	NA
RCOR3	4	8	-4	4	NA	NA
RUNX3	6	10	-4	4	NA	NA
RXRA	7	11	-4	4	NA	NA
SCRT2	4	8	-4	4	NA	NA
SETDB2	6	10	-4	4	NA	NA
SFPQ	5	10	-5	5	NA	NA
SMARCA5	7	10	-3	3	NA	NA
SMARCC1	6	10	-4	4	NA	NA
SMARCE1	5	9	-4	4	NA	NA
SOX13	5	10	-5	5	NA	NA
SOX14	7	10	-3	3	NA	NA
SOX18	5	8	-3	3	NA	NA
SOX4	5	10	-5	5	NA	NA
SP3	6	10	-4	4	NA	NA
SP4	4	10	-6	6	NA	NA
SSRP1	5	10	-5	5	NA	NA
TADA2A	5	9	-4	4	NA	NA
TBX20	3	10	-7	7	NA	NA
TBX4	5	9	-4	4	NA	NA
TFAP4	6	11	-5	5	NA	NA
TFCP2	6	9	-3	3	NA	NA
TFDP2	2	9	-7	7	NA	NA
TGIF1	7	10	-3	3	NA	NA
THAP12	3	10	-7	7	NA	NA
TRERF1	7	10	-3	3	NA	NA
TRPS1	7	10	-3	3	NA	NA
TSC22D1	4	10	-6	6	NA	NA
TSHZ2	2	10	-8	8	NA	NA
USF1	5	8	-3	3	NA	NA
WDHD1	4	8	-4	4	NA	NA
YEATS4	0	10	10	10	NA	NA
YY2	5	9	-4	4	NA	NA
ZBTB11	7	11	-4	4	NA	NA
ZBTB14	5	8	-3	3	NA	NA
ZBTB26	5	10	-5	5	NA	NA
ZBTB49	6	10	-4	4	NA	NA
ZBTB6	0	8	10	10	NA	NA
ZGPAT	5	9	-4	4	NA	NA
ZNF148	3	9	-6	6	NA	NA
ZNF236	6	10	-4	4	NA	NA
ZNF326	5	10	-5	5	NA	NA
ZNF407	6	10	-4	4	NA	NA
ZNF410	5	9	-4	4	NA	NA
ZNF512	5	9	-4	4	NA	NA
ZNF609	6	9	-3	3	NA	NA
ZNF644	5	10	-5	5	NA	NA
ZNF654	6	9	-3	3	NA	NA
ZNF740	7	10	-3	3	NA	NA
ZNF767	7	10	-3	3	NA	NA
