# Supplementary material for: Transition from natal downs to juvenile feathers: conserved regulatory switches in Neoaves
Source: Research Square preprint supplement (doi:10.21203/rs.3.rs-3382427/v1), 2023-10-03
Supplement: Supplementary file 5 [file c4ab778824ed7b1cd3c653b5.xlsx]

## Sheet: sample description
sno	Library ID	Sample ID	stage	tissue	region
c816	Chuong-816	E7d-16	Embryonic day7	skin dermis	dorsal
c817	Chuong-817	E7d-17	Embryonic day7	skin dermis	dorsal
c818	Chuong-818	E7e-18	Embryonic day7	skin epidermis	dorsal
c819	Chuong-819	E7e-19	Embryonic day7	skin epidermis	dorsal
c821	Chuong-821	E9d-21	Embryonic day9	skin dermis	dorsal
c827	Chuong-827	E9d-27	Embryonic day9	skin dermis	dorsal
c823	Chuong-823	E9e-23	Embryonic day9	skin epidermis	dorsal
c826	Chuong-826	E9e-26	Embryonic day9	skin epidermis	dorsal
c824	Chuong-824	E14-24	Embryonic day14	feather filament	dorsal
c825	Chuong-825	E14-25	Embryonic day14	feather filament	dorsal
l3_11	Li_3_11M	P3-11	Posthatch day3	skin	dorsal
l3_12	Li_3_12M	P3-12	Posthatch day3	skin	dorsal
l3_13	Li_3_13M	P3-13	Posthatch day3	skin	dorsal
l4_11	Li_4_11M	P4-11	Posthatch day4	skin	dorsal
l4_12	Li_4_12M	P4-12	Posthatch day4	skin	dorsal
l4_14	Li_4_14M	P4-14	Posthatch day4	skin	dorsal
l5_8	Li_5_8M	P5-8	Posthatch day5	skin	dorsal
l5_9	Li_5_9M	P5-9	Posthatch day5	skin	dorsal
l5_10	Li_5_10M	P5-10	Posthatch day5	skin	dorsal
l6_11	Li_6_11M	P6-11	Posthatch day6	skin	dorsal
l6_12	Li_6_12M	P6-12	Posthatch day6	skin	dorsal
l6_13	Li_6_13M	P6-13	Posthatch day6	skin	dorsal
l7_8	Li_7_8M	P7-8	Posthatch day7	skin	dorsal
l7_9	Li_7_9M	P7-9	Posthatch day7	skin	dorsal
l7_11	Li_7_11M	P7-11	Posthatch day7	skin	dorsal

## Sheet: protein coding
gene_id	Gene name	TF family	biotype	E7d-16	E7d-17	E7e-18	E7e-19	E9d-21	E9d-27	E9e-23	E9e-26	E14-24	E14-25	P3-11	P3-12	P3-13	P4-11	P4-12	P4-14	P5-8	P5-9	P5-10	P6-11	P6-12	P6-13	P7-8	P7-9	P7-11
AFF1_1	AFF1	AF-4	protein_coding	11.4706	13.2561	18.5177	20.9051	32.2748	50.2812	27.4559	40.6501	22.4499	24.1443	75.3546	67.7151	93.3429	63.7876	74.3198	70.9803	83.9975	65.0939	59.0953	66.865	59.18	64.3539	48.542	56.0325	57.2614
AFF2_1	AFF2	AF-4	protein_coding	35.097	29.1021	4.28333	5.32279	20.4787	34.2175	10.9014	16.8037	4.1862	3.88643	11.1353	10.0681	13.4992	11.951	12.5974	12.6649	15.0593	13.1694	11.9466	13.9391	12.0825	9.20199	9.42722	13.0279	10.1328
AFF4_1	AFF4	AF-4	protein_coding	35.6002	33.2268	17.49	18.0954	38.3449	46.5465	42.0962	49.5575	21.3628	22.5725	60.902	64.3486	68.3013	59.6301	68.3238	65.3136	69.0304	66.0488	71.8774	73.762	69.6478	61.6088	67.3191	74.0222	61.9533
TFAP2A_1	TFAP2A	AP-2	protein_coding	10.5192	3.38368	235.939	276.433	18.415	38.921	193.966	314.108	34.2407	45.6513	35.5436	36.069	34.5229	39.778	37.9508	44.0229	37.6554	54.3761	57.7779	71.3879	64.3809	59.2672	64.0224	66.7481	59.7372
TFAP2B_1	TFAP2B	AP-2	protein_coding	11.5174	2.67435	203.6	195.677	1.26508	1.34872	100.638	114.451	8.52989	9.56029	14.9087	12.5008	14.6715	12.0646	10.5341	12.8135	15.2744	15.7935	20.4964	21.2812	17.7818	18.4359	18.6164	19.9057	16.5393
TFAP2C_1	TFAP2C	AP-2	protein_coding	5.54598	2.87175	105.586	119.204	50.6596	85.572	198.158	218.447	79.4585	68.6287	26.5853	32.7952	31.1727	34.6133	33.9752	34.6809	36.8802	47.4865	57.0459	96.537	104.249	84.305	100.253	95.6394	90.2736
TFAP2E_1	TFAP2E	AP-2	protein_coding	1.91632	0.659707	79.3641	91.1985	0.4844	1.05403	40.9568	49.7453	83.2142	112.475	7.25039	8.58805	8.41187	8.75344	8.86613	9.75622	10.2441	11.8248	13.2783	23.8169	28.0776	24.8288	42.4963	25.1729	32.4486
ARID1B_1	ARID1B	ARID	protein_coding	62.0699	61.1165	100.12	115.599	62.9929	87.9857	119.69	185.193	26.6198	29.9343	34.1162	36.2958	37.982	32.4764	38.4654	35.8569	39.2439	38.5305	41.288	46.696	46.6733	41.3063	38.9475	40.5176	39.2126
ARID2_1	ARID2	ARID	protein_coding	38.9248	39.7231	42.8232	45.5563	43.7446	62.4804	35.7394	46.5845	14.1134	14.8983	13.4181	11.9779	13.4237	10.7519	12.3646	12.0645	15.6559	13.7418	14.1434	15.0935	14.9506	13.8985	12.9527	14.7615	12.3615
ARID3A_1	ARID3A	ARID	protein_coding	10.0505	9.21109	25.3577	26.7441	7.99644	10.4605	22.1615	34.6965	21.6412	20.773	5.24007	5.55094	5.47568	5.67687	5.82508	5.97977	5.00638	4.41441	5.63947	6.73441	6.50087	6.2022	7.24893	6.072	6.66704
ARID3B_1	ARID3B	ARID	protein_coding	20.9177	20.1382	74.1621	73.9867	12.6741	22.3268	40.5758	57.4951	12.3024	12.3827	9.89406	12.5644	12.0198	12.5325	12.8294	16.1264	11.8943	12.0111	12.5308	12.5649	12.1275	11.3818	13.7221	12.5846	10.5501
ARID4A_1	ARID4A	ARID	protein_coding	32.6476	34.7809	28.6552	31.055	36.7798	46.2403	30.6911	33.1398	13.7549	13.6631	20.0221	23.64	22.4434	22.4039	23.6861	19.8315	24.5059	24.9329	25.4198	24.8333	25.8279	23.2957	23.0846	26.5345	19.8418
ARID4B_1	ARID4B	ARID	protein_coding	29.6439	29.2133	33.76	36.3387	30.6791	42.6502	32.0874	38.453	12.8609	11.5885	20.4597	21.1714	22.6842	19.3519	23.5728	22.1186	22.7281	22.5448	21.3796	22.9929	23.9636	22.771	23.8656	26.4594	20.2186
ARID5A_1	ARID5A	ARID	protein_coding	3.04485	2.87439	2.37301	2.95638	6.37304	12.3947	3.80497	6.14715	1.52177	2.05642	12.7935	14.3889	13.7985	14.0113	16.1185	13.7834	15.2442	8.85812	11.9217	9.03747	7.97586	8.90692	6.42511	8.94743	8.76094
ARID5B_1	ARID5B	ARID	protein_coding	18.1149	17.6142	30.1726	45.6813	77.5426	135.893	103.782	139.169	33.2533	34.4526	26.2141	21.9081	30.2789	30.0895	31.3611	25.8855	33.1222	30.5045	29.9188	35.4389	35.5859	30.8709	27.3638	35.2604	33.2711
JARID2_1	JARID2	ARID	protein_coding	65.7951	45.596	48.5326	52.217	53.3329	88.0828	40.4325	61.626	37.8381	35.7533	20.679	19.1094	18.7536	17.7538	18.8422	20.8339	22.698	20.9886	23.0303	25.8213	27.192	26.0496	24.3657	29.0164	23.3633
AHR2_1	AHR2	bHLH	protein_coding	0.457708	0.148321	0.060484	0.153033	0.265276	0.751282	0.119568	0.192744	0.066822	0.042441	2.05052	1.55724	2.22624	1.87784	1.79251	2.13055	1.6826	3.48073	2.65222	2.00446	2.49387	2.6301	1.58443	2.08329	1.45304
AHRR_1	AHRR	bHLH	protein_coding	37.0467	29.7942	0.2787	0.223204	28.3181	42.201	0.240952	0.403116	4.25034	6.11532	9.08466	9.35974	8.93881	7.88029	8.69727	8.97753	7.86548	9.3415	8.06569	7.4682	5.73706	4.5524	4.84608	7.22002	4.47532
ARNT_1	ARNT	bHLH	protein_coding	118.149	125.845	68.7359	73.7792	186.006	232.441	68.9771	82.4981	25.5569	29.5308	80.1527	73.2062	84.4412	73.3458	80.1187	91.2842	82.223	80.1269	77.6799	81.9119	73.1327	79.6015	64.0221	69.3314	75.0236
ARNT2_1	ARNT2	bHLH	protein_coding	20.7577	18.7815	19.1862	21.2165	17.7772	24.8432	19.7131	23.9076	2.16903	2.55483	8.18476	6.58358	8.45658	6.81457	8.98457	6.78281	9.46223	8.33744	7.95138	9.05173	7.374	7.1056	5.95184	6.78446	6.29753
ARNTL_1	ARNTL	bHLH	protein_coding	19.9755	19.7075	37.288	44.0151	21.3692	28.3482	19.1755	19.1737	12.8936	12.1188	35.0675	34.7168	34.8387	36.707	38.3669	45.5704	41.1682	32.8267	32.5686	42.2321	38.2611	42.7935	32.2042	33.3309	37.8153
ARNTL2_1	ARNTL2	bHLH	protein_coding	34.4514	24.5435	24.8074	27.5937	17.641	16.8912	33.6337	34.0572	23.4836	18.775	34.2411	40.2235	35.4569	35.8549	40.1472	39.6914	51.5394	45.8746	46.6575	57.3355	60.5807	47.7751	68.5895	68.31	53.0632
ASCL4_1	ASCL4	bHLH	protein_coding	0.341497	0.216384	1.84897	5.2595	0.186924	0.023412	13.2992	2.70164	0.03418	0.055994	0.051855	0.0685	0.052905	0.083453	0.057789	0.088507	0.05681	0.051436	0.028137	0.012415	0.070007	0	0.045351	0.110518	0.059971
ATOH8_1	ATOH8	bHLH	protein_coding	78.8736	94.8265	1.17263	1.45777	92.4373	116.345	3.65237	2.84021	7.25195	10.5425	33.2041	28.3238	28.7003	27.0023	25.0629	34.0376	28.8909	29.0865	28.0652	26.3942	14.9565	27.6712	16.6989	22.761	21.2668
BHLHE40_1	BHLHE40	bHLH	protein_coding	5.75753	4.157	6.17653	3.10633	2.55978	2.41654	4.17058	3.78315	55.2868	77.5205	31.8018	29.9806	32.4689	32.9439	28.7906	33.5464	34.2279	29.4909	31.8281	39.0963	45.4644	37.6518	65.8927	61.0533	58.9459
BHLHE41_1	BHLHE41	bHLH	protein_coding	12.8221	10.1275	5.44874	2.23992	13.4605	31.8934	3.88337	7.64593	5.57918	5.71731	12.1981	10.8513	8.26078	13.1207	9.63368	16.6839	17.318	17.591	16.3429	24.4415	29.3779	22.0907	21.5524	20.3678	25.4401
CLOCK_1	CLOCK	bHLH	protein_coding	8.23687	7.71154	7.81233	8.67788	6.50938	10.3185	9.9294	12.8394	4.97566	3.62117	33.2926	39.0043	32.3777	33.8972	35.0475	40.848	35.7384	33.8235	33.4435	31.1363	25.4864	28.0991	26.4985	33.3998	24.3605
HAND2_1	HAND2	bHLH	protein_coding	0.650271	2.42525	0	0.238956	7.23491	23.6434	0.087619	0	0.767182	0.742884	5.9424	6.71904	6.91181	16.0444	9.405	9.47315	13.7385	5.96052	7.3933	14.2891	5.53057	11.8956	5.27774	9.1545	10.6636
HES4_1	HES4	bHLH	protein_coding	101.654	104.933	118.179	142.717	165.662	257.73	115.359	319.834	72.0202	67.2578	37.6378	34.9038	42.792	56.3443	45.0674	41.1495	39.8777	50.5661	63.4124	79.7391	66.9667	78.0628	81.1272	80.1888	68.6994
HES5_1	HES5	bHLH	protein_coding	1.75493	3.64035	0	0	14.3628	10.5471	0	0	0.932152	0.965385	0	0	0	0	0	0	0	0	0	0.543287	0.379639	0	0.502395	0.166585	0.437658
HEY2_1	HEY2	bHLH	protein_coding	3.37029	7.67957	1.16664	0.368046	50.3827	46.4876	0.412607	0.824916	6.9503	9.72037	12.0782	11.4169	11.7012	12.6936	12.5133	11.5849	16.4089	15.6822	17.5419	16.4057	18.8919	16.1451	12.7443	17.0011	16.582
HEYL_1	HEYL	bHLH	protein_coding	31.65	35.3406	56.2845	56.7428	57.5244	65.8056	22.268	52.5151	23.7767	30.9191	12.2952	11.9236	10.1616	15.6475	12.3319	16.2298	11.3293	14.6854	16.3754	31.4346	33.432	30.8931	33.6585	30.2047	32.6161
HIF1A_1	HIF1A	bHLH	protein_coding	90.6229	88.8328	76.3478	81.9328	85.7154	77.5037	78.6864	51.6369	40.3712	35.0336	90.4676	109.205	105.091	101.304	106.101	99.1643	115.301	108.111	114.966	136.561	139.741	119.094	134.959	131.162	131.938
ID1_1	ID1	bHLH	protein_coding	116.855	130.898	203.683	186.999	85.4828	113.636	103.27	239.145	157.786	168.041	119.701	123.831	167.636	156.594	124.478	123.456	105.512	126.703	105.794	114.715	113.17	132.92	135.089	118.827	146.287
ID2_1	ID2	bHLH	protein_coding	295.766	346.829	91.9794	123.498	278.628	309.383	261.265	337.851	241.522	193.896	106.913	116.221	120.458	128.617	118.214	119.638	114.373	122.089	116.142	179.148	194.546	192.452	176.77	182.084	169.377
ID3_1	ID3	bHLH	protein_coding	171.57	183.34	106.702	126.316	235.331	327.772	371.523	465.679	302.918	306.512	119.811	127.268	126.017	146.12	129.792	141.602	115.539	128.535	130.627	208.56	238.082	232.295	248.416	239	292.45
ID4_1	ID4	bHLH	protein_coding	60.7077	68.6874	29.5569	5.47298	115.51	138.545	22.1756	25.5148	46.6998	32.0502	145.518	123.374	127.353	159.378	121.53	125.18	110.737	112.926	99.4767	143.978	116.977	132.067	119.708	131.881	136.586
MAX_1	MAX	bHLH	protein_coding	43.8797	45.0932	55.5394	60.7941	42.4585	56.3273	40.122	52.5123	23.931	22.4687	27.0497	30.7681	32.3038	27.3366	25.2196	31.1035	32.7445	33.8284	24.4835	35.3856	34.1721	32.3607	18.7857	21.6705	27.9851
MITF_1	MITF	bHLH	protein_coding	9.61539	4.89595	40.049	47.1962	9.61634	12.3168	51.7601	52.6302	21.5003	20.3963	22.9159	20.8014	24.2845	22.5949	22.3199	21.686	34.5551	28.232	33.2212	35.5461	39.9907	24.7567	32.131	40.9706	31.977
MLX_1	MLX	bHLH	protein_coding	66.0255	65.1633	67.9293	66.5783	56.2114	73.4263	75.9318	77.6191	40.1589	33.0544	93.1204	100.518	95.6804	94.0331	92.8494	105.736	102.595	98.7151	99.0728	103.423	101.421	104.105	112.438	112.878	90.3101
MLXIP_1	MLXIP	bHLH	protein_coding	43.5127	42.0555	44.5883	50.2295	46.2372	53.7875	34.5907	33.6011	9.73099	9.19937	36.6973	34.9217	36.9488	32.9456	43.4562	35.8362	41.9758	40.2067	39.825	39.4745	35.5268	33.6343	28.5857	36.0479	31.013
MNT_1	MNT	bHLH	protein_coding	20.278	20.5125	23.7477	29.6799	23.4917	35.912	26.7999	42.0068	8.45836	11.9519	24.6048	20.7379	20.1786	19.1973	21.7156	20.6649	21.924	23.5789	22.7359	20.7085	20.4101	21.4921	15.1423	18.8034	19.5508
MSC_1	MSC	bHLH	protein_coding	0	0	0	0	0	0.095664	0.044391	0	0.090448	0	4.83461	6.66139	8.36838	3.27903	3.33283	6.88139	7.22855	5.39284	3.46883	1.62563	5.13282	1.47907	1.32817	1.04852	0.808927
MXD1_1	MXD1	bHLH	protein_coding	17.1493	18.5786	20.4172	24.7943	18.7537	20.7549	17.643	17.8845	22.1066	22.6736	25.5311	27.1295	23.268	25.1971	31.2328	38.8045	28.5568	30.6061	36.2331	29.9221	38.0625	30.2474	30.909	31.301	31.4962
MXD4_1	MXD4	bHLH	protein_coding	22.2841	25.2681	33.7289	46.0535	59.4465	65.6041	31.2946	25.0946	26.745	23.5973	69.1671	59.7393	72.3313	52.9488	71.8769	54.4981	73.9591	72.0738	72.7508	65.8036	65.7898	60.9093	47.6538	58.8103	53.8143
MXI1_1	MXI1	bHLH	protein_coding	16.6856	18.5782	19.2346	22.3537	21.1947	24.02	17.9052	17.5506	17.1122	16.6396	49.3987	49.525	53.8391	41.6295	48.2809	44.1329	52.4594	59.5843	57.3385	39.1824	45.2028	44.411	45.9606	48.632	39.0642
MYC_1	MYC	bHLH	protein_coding	12.8021	10.453	22.7212	33.7273	35.7774	34.0938	105.82	100.408	33.9056	44.7631	37.4812	38.9882	45.4825	44.6704	42.008	47.2873	48.6947	43.2168	48.35	52.8623	59.898	47.2474	60.6281	65.8798	55.8597
MYCL_1	MYCL	bHLH	protein_coding	19.0628	17.9285	109.312	115.775	14.2082	17.6037	73.6298	99.6989	29.3545	28.5933	31.0248	44.2244	38.7065	35.4432	37.0395	49.3416	31.7459	39.5051	41.0188	39.2358	45.6083	43.7557	52.376	49.1282	46.0901
MYCN_1	MYCN	bHLH	protein_coding	36.1611	43.6378	79.921	109.385	67.3282	67.2141	54.3684	40.9285	4.06825	4.11679	11.7274	10.5315	12.2671	12.6932	10.9794	9.35226	11.446	11.6207	11.8668	16.0932	12.8634	15.3387	12.4264	15.2775	13.5838
MYOD1_1	MYOD1	bHLH	protein_coding	0.247265	0.244794	0.066908	0.033959	0.142356	0.694859	0.03813	0.063582	0.256426	0.136976	0	0.284206	4.72829	0.12058	0.065755	0.132175	0	0	0	0	0	0.326509	0.125718	0.064857	0.255214
NCOA1_1	NCOA1	bHLH	protein_coding	35.2342	36.8719	60.4596	65.0508	83.4135	151.212	89.8885	170.08	57.7633	68.1957	33.2609	34.3371	32.9636	29	33.6762	39.4241	35.0198	34.1869	37.7191	43.6015	42.256	36.6084	40.5003	40.0473	42.7976
NCOA3_1	NCOA3	bHLH	protein_coding	33.8513	39.277	36.2052	43.1681	29.8632	35.1237	16.7806	22.262	8.75461	6.6684	20.3304	22.866	22.3806	19.1842	22.6723	19.5031	24.6749	25.246	22.7035	22.2313	20.9697	19.0728	20.3064	22.6878	18.3224
NPAS2_1	NPAS2	bHLH	protein_coding	0.645954	0.350072	0	0.098622	1.34713	1.47219	0.504408	0.734938	0.679907	0.928815	16.2664	16.4515	16.6592	18.7594	23.5652	39.4715	19.8007	18.6305	17.4922	22.819	21.0507	26.4802	11.7062	12.9001	22.9856
NPAS3_1	NPAS3	bHLH	protein_coding	24.652	28.0541	1.42543	1.69968	37.6654	54.9498	8.6018	8.95811	1.45424	0.954138	5.36671	4.9394	5.32545	5.17805	4.50459	3.71011	4.93023	4.38685	4.05563	4.6068	2.99393	3.61314	2.66527	3.55846	3.96625
SCX_1	SCX	bHLH	protein_coding	1.00271	0.377671	0	0.118704	0.215966	0.990381	0	0	0.535325	0.177781	6.25318	7.186	3.4358	13.3713	12.2476	19.7333	12.5443	10.4671	14.0117	6.59936	7.5324	4.95231	9.36149	12.8568	10.8448
SIM1_1	SIM1	bHLH	protein_coding	0.369646	1.31809	0.00924	0.01386	4.31532	6.05946	0	0	0.553977	0.506388	1.70844	1.94585	1.36093	1.8681	1.14696	0.950818	1.35825	0.796977	0.954341	1.64982	0.611531	0.97824	0.356174	1.13614	1.83084
SREBF1_1	SREBF1	bHLH	protein_coding	21.7687	23.8266	24.6514	36.6254	15.3331	26.467	32.2264	57.0427	40.0681	39.2385	51.9766	64.9889	56.7125	63.5037	59.8846	52.8558	44.7824	63.0966	64.4558	60.2776	60.3354	47.0372	63.668	62.6178	70.3734
SREBF2_1	SREBF2	bHLH	protein_coding	55.7799	51.8599	72.3445	83.6423	38.256	43.9695	73.1721	97.9352	60.8166	66.1496	76.1269	80.1301	85.1093	85.4995	111.815	71.8699	114.318	117.657	121.098	135.961	126.331	113.196	129.815	114.393	128.489
TAL1_1	TAL1	bHLH	protein_coding	6.26027	6.49729	0	0	5.47898	5.8205	0	0.088258	1.01818	1.05924	15.1884	12.965	11.7642	14.4297	13.1542	13.0175	8.29142	8.52253	11.1618	8.75189	9.801	9.23374	8.98029	6.15742	9.11174
TCF12_1	TCF12	bHLH	protein_coding	977.251	883.198	251.592	262.67	830.581	791.117	267.729	208.382	88.5049	70.5995	293.513	313.662	307.065	302.999	341.785	283.236	376.362	347.836	359.674	350.887	342.091	306.062	311.674	324.128	310.371
TCF15_1	TCF15	bHLH	protein_coding	2.66423	3.08136	2.29536	1.42476	3.23036	3.92007	1.12177	0.894575	0.889667	1.01388	22.8763	13.5296	15.9321	18.3446	23.7809	19.634	25.8604	15.4908	28.2704	18.9295	16.0447	22.1526	10.1418	14.1603	21.0681
TCF21_1	TCF21	bHLH	protein_coding	0	0	0	0.307273	0.246513	0.113909	0	0.082497	0	0.044664	2.01078	1.71946	3.58085	0.718451	2.32407	1.96577	2.9841	3.17607	1.12773	0.771904	1.2264	1.4656	0.543733	1.57189	0.32413
TCF3_1	TCF3	bHLH	protein_coding	157.773	165.205	220.943	218.212	173.792	211.668	128.981	120.682	24.7998	30.3719	59.1375	54.4821	56.8408	58.4407	67.6992	66.8009	62.3933	57.7912	67.4897	66.7215	59.9447	55.5048	54.4644	55.9017	55.1368
TCFL5_1	TCFL5	bHLH	protein_coding	1.53058	0.861065	1.50627	1.48815	0.744514	1.18222	5.07826	7.17856	0.692336	0.844324	2.13537	2.17297	2.48601	1.75421	1.68608	1.16226	2.41128	3.75185	3.46546	3.58945	3.2239	3.27853	4.41417	4.59625	2.98143
TFAP4_1	TFAP4	bHLH	protein_coding	20.7518	23.0947	29.388	27.2528	30.1768	30.8889	45.1217	39.6298	4.74396	4.47983	11.6365	15.2145	12.6332	17.5814	15.6227	11.2212	17.3464	15.6474	14.8695	18.746	16.0258	17.4752	20.515	16.6968	15.5311
TFEB_1	TFEB	bHLH	protein_coding	7.48259	5.56833	10.4519	11.4657	8.40373	10.9946	8.1398	12.8986	6.66906	6.54134	14.6623	13.6567	15.3956	13.8171	16.2956	16.9402	12.8602	14.4257	13.3573	18.7393	17.942	17.4336	16.1128	17.555	16.9428
TWIST1_1	TWIST1	bHLH	protein_coding	592.618	547.184	0.910134	0.826506	753.915	794.459	0.435664	0.189456	20.5281	14.1599	58.9842	61.4939	50.1514	68.8273	57.4497	51.8033	49.5041	64.3194	58.6389	50.5678	50.8882	54.5174	43.6135	54.1659	42.9598
TWIST2_1	TWIST2	bHLH	protein_coding	870.215	805.064	1.23128	1.78815	470.321	509.667	0.107824	0	27.7265	20.2747	110.127	118.511	93.3643	115.859	126.079	109.098	80.2915	116.607	131.488	106.395	95.4334	105.861	83.332	112.089	87.2141
TWIST3_1	TWIST3	bHLH	protein_coding	521.466	403.786	0.671343	0.42172	169.119	211.114	0.058796	0	4.01246	2.81393	10.9229	17.1282	10.6416	15.4176	13.3444	16.1658	7.84941	9.09369	10.5153	7.39983	5.79674	7.16578	7.58404	7.79967	7.05932
USF1_1	USF1	bHLH	protein_coding	122.615	119.94	123.39	132.204	111.748	135.146	122.666	155.584	40.6556	45.0081	84.3276	89.9049	92.901	81.679	88.3277	93.6111	82.6633	84.078	87.4032	97.9303	97.2084	94.4264	90.317	83.1459	88.8668
USF3_1	USF3	bHLH	protein_coding	13.9387	13.3017	17.0717	19.4608	14.0238	23.0741	16.5914	21.4328	3.69242	4.43543	9.72987	8.84518	9.2503	8.21818	8.89218	9.27157	10.2511	10.4026	9.93886	8.1051	8.49523	6.96358	8.27949	10.0088	7.77162
CBFB_1	CBFB	CBF	protein_coding	101.821	124.261	53.4701	60.2655	147.022	140.753	123.562	100.363	186.388	156.003	67.3117	80.6487	62.7151	87.651	86.8319	68.9544	77.8736	80.3841	88.0812	120.749	158.351	136.321	144.316	132.091	160.429
CAMTA1_1	CAMTA1	CG-1	protein_coding	17.6297	14.758	28.1376	24.9723	12.6217	16.5532	18.335	25.5175	11.7234	10.5947	14.873	15.2597	14.014	14.4989	14.2513	15.3488	17.6535	14.4251	16.5747	14.8524	13.3173	15.0081	13.5877	15.2856	14.011
EBF1_1	EBF1	COE	protein_coding	10.8427	11.8008	0.257845	0.57575	131.765	214.865	0.482903	0.316981	8.50267	8.28404	17.9656	16.5	16.9365	22.0626	21.5722	20.0309	18.2877	16.931	14.1997	19.279	15.1582	16.6365	9.36532	14.4688	15.459
EBF2_1	EBF2	COE	protein_coding	4.24911	2.87377	0.161306	0.077549	11.3714	16.7424	0.736726	0.766965	0.711901	0.599338	15.7959	12.3511	16.5241	15.63	15.5191	16.2153	12.9847	14.0916	13.8792	9.32869	6.88716	9.46054	5.90631	9.17987	6.7621
EBF3_1	EBF3	COE	protein_coding	16.3065	12.1873	0.042078	0.051285	22.1281	19.3991	0.090163	0.145222	2.23293	1.24833	22.9197	20.8754	20.587	20.3892	21.7754	22.6718	16.5653	23.6583	20.7795	20.0935	13.6367	14.1477	12.1428	15.4494	13.8901
GRHL1_1	GRHL1	CP2	protein_coding	3.59361	0.971767	81.6354	86.752	1.19881	2.3501	93.1874	151.549	247.84	251.715	41.7882	42.4427	39.9349	50.4977	54.6093	58.2957	62.9572	84.311	86.362	150.1	203.752	141.78	214.622	192.861	177.293
GRHL2_1	GRHL2	CP2	protein_coding	2.2576	0.708896	52.4475	56.3117	0.531675	0.591836	101.647	112.024	14.8954	14.0846	13.7155	18.7502	14.6408	14.5163	15.474	18.3812	19.5326	20.4434	21.6684	21.5799	22.5943	17.4297	26.418	27.4892	21.302
GRHL3_1	GRHL3	CP2	protein_coding	8.18531	6.62107	62.6907	58.4378	9.27793	7.93438	102.451	154.231	61.4421	71.3544	15.6538	14.8021	14.7635	15.7118	15.9176	13.4372	21.8259	20.1655	25.3133	52.7398	59.4833	43.0938	68.4711	66.4098	54.7254
TFCP2_1	TFCP2	CP2	protein_coding	66.4583	62.7926	76.8856	82.4867	56.2164	72.0228	80.9205	92.93	15.1787	18.0898	25.8152	27.413	28.9376	28.0146	29.3221	28.6345	29.3358	26.7928	32.0637	37.4212	35.0954	34.8423	30.8788	32.3014	32.9611
TFCP2L1_1	TFCP2L1	CP2	protein_coding	3.42023	2.24715	3.58535	3.05585	2.30356	3.18483	5.99495	7.56108	36.335	28.2875	39.8255	41.0002	29.8781	46.1831	47.5427	47.9521	74.2465	76.3588	97.9015	126.324	110.867	87.5592	114.456	108.996	136.506
UBP1_1	UBP1	CP2	protein_coding	73.9762	70.782	74.4458	77.1294	81.7133	82.3776	101.727	99.0716	20.0133	20.1415	75.4394	84.1421	79.6663	79.8214	86.4007	78.7146	97.5491	92.3575	99.8224	108.093	104.92	93.5282	101.019	105.443	86.961
CARHSP1_1	CARHSP1	CSD	protein_coding	33.4158	25.5009	60.7265	63.868	28.9303	23.1211	41.1804	31.5438	47.8178	34.481	116.931	125.707	143.353	126.917	139.953	120.5	123.831	133.943	122.528	104.669	98.1688	114.632	80.6268	96.2313	112.366
CSDE1_1	CSDE1	CSD	protein_coding	509.26	528.431	591.991	616.956	462.975	427.5	605.145	514.29	229.506	187.723	371.057	369.646	390.491	348.854	371.809	358.319	396.924	393.586	402.307	433.653	436.412	397.689	425.675	430.867	403.963
LIN28B_1	LIN28B	CSD	protein_coding	2.09562	1.16262	4.89311	8.51082	0.566262	0.46042	8.80797	15.3228	0.508485	0.34595	0	0	0	0	0	0	0	0.169265	0	0	0	0	0.216892	0	0.134652
YBX1_1	YBX1	CSD	protein_coding	2059.01	2206.02	2609.78	2917.22	1895.76	1817.74	2090.87	2109.37	444.53	431.805	1813.82	1780.14	1960.84	1668.41	1930.83	1581.14	1838.54	1763.45	1650.92	1702.68	1619.55	1591.52	1404.61	1470.92	1450.4
YBX3_1	YBX3	CSD	protein_coding	316.09	326.805	257.547	333.786	233.505	202.05	281.079	270.133	252.469	248.752	526.68	520.154	549.579	477.325	430.712	466.742	480.787	438.314	416.785	445.906	387.976	458.513	360.04	383.454	424.747
RBPJ_1	RBPJ	CSL	protein_coding	26.7775	23.953	15.2229	16.4086	34.0309	26.2543	23.8766	19.3029	11.295	8.56328	43.8655	46.0807	56.8199	39.8356	48.4342	39.2405	45.685	52.2186	40.9078	43.6499	44.4263	39.5016	33.6688	39.6149	34.4385
CSRNP1_1	CSRNP1	CSRNP_N	protein_coding	54.9558	78.4356	8.20526	12.2469	91.5723	106.574	39.6984	32.9459	28.6156	27.2723	47.5294	61.6837	44.4702	51.2037	48.7795	62.7823	49.0357	42.794	49.4253	43.7073	35.34	36.6434	33.0479	57.1449	47.3162
CSRNP2_1	CSRNP2	CSRNP_N	protein_coding	19.7476	20.3495	24.3521	26.8615	19.167	33.051	20.2686	33.0333	5.37456	5.25768	5.19022	5.58212	5.93012	6.16829	6.32997	6.13264	5.822	5.6476	5.55414	9.77586	6.70339	8.12785	7.02175	7.37689	7.16772
CSRNP3_1	CSRNP3	CSRNP_N	protein_coding	1.89015	0.941023	0.306352	0.2985	0.562543	1.86561	0.872152	8.92383	2.18592	2.51001	0.578747	0.422815	0.592377	0.470293	0.489808	0.436526	0.406246	0.419464	0.552399	1.00219	0.333376	0.941737	1.5755	2.12701	0.406995
NFIA_1	NFIA	CTF/NFI	protein_coding	355.995	410.706	165.759	187.987	490.343	671.13	149.01	170.536	39.4138	31.0827	60.01	59.4821	66.6782	56.9753	68.5751	44.5172	66.6825	59.2377	60.3853	50.4547	43.5025	44.9058	37.9225	46.8001	48.654
NFIC_1	NFIC	CTF/NFI	protein_coding	81.6001	82.7849	5.73679	6.96942	155.471	244.307	3.85268	5.35408	15.6255	22.4092	90.1185	84.9246	89.2943	78.8988	84.7642	90.9027	80.7477	76.128	90.2508	94.7125	76.1444	84.6762	62.0845	66.4343	80.4806
NFIX_1	NFIX	CTF/NFI	protein_coding	119.543	140.389	14.3783	21.752	217.152	348.549	51.8014	79.4685	34.69	27.207	310.025	313.533	322.722	265.485	331.4	288.58	245.977	225.544	267.184	238.885	193.824	217.426	183.883	182.427	199.899
CUX2_1	CUX2	CUT	protein_coding	8.8732	10.0131	0.7246	0.866232	4.48619	8.47761	0.280895	0.326017	0.140344	0.137766	0.504778	0.181313	0.464269	0.243816	0.52369	0.556698	0.391199	0.433914	0.270568	0.325814	0.240275	0.371338	0.267506	0.286873	0.16266
ONECUT1_1	ONECUT1	CUT	protein_coding	6.14648	2.91896	2.06058	2.6494	1.31771	2.34891	1.04843	1.76174	0.065017	0.149358	0.064599	0	0.063084	0.181482	0.194827	0.095383	0.318513	0.334153	0.27399	0.27723	0.377499	0.22053	0.396212	0.332097	0.208366
SATB1_1	SATB1	CUT	protein_coding	19.0806	13.9152	75.9145	96.8024	8.00646	10.5296	113.843	125.408	31.6215	33.5243	5.21017	8.2343	7.97532	4.79941	6.74963	7.16617	6.93107	6.78569	7.34184	12.5528	14.816	10.906	18.1753	13.6732	13.0684
SATB2_1	SATB2	CUT	protein_coding	3.98068	9.16154	1.3411	1.39262	57.8482	78.254	5.28493	4.83243	1.82833	1.44295	2.28142	2.19132	2.20316	2.41183	2.22429	2.76219	2.43634	3.3579	4.11135	3.57472	2.70173	2.70098	2.55432	2.76723	1.75257
DACH1_1	DACH1	DACH	protein_coding	4.74094	3.3403	12.0247	10.7589	6.44473	8.59545	23.3553	45.8726	23.6751	23.5063	2.19035	2.33841	1.88775	2.93712	3.10964	1.98163	4.17165	3.14191	2.75894	3.79604	3.84445	3.73585	3.49948	4.2973	3.23524
DACH2_1	DACH2	DACH	protein_coding	6.67233	6.23597	18.1435	19.5733	5.92186	7.5841	9.11636	11.2663	0.886066	0.665079	3.63035	3.68716	4.2368	3.78645	3.85696	5.65721	5.19466	4.28787	2.59074	3.43537	1.88039	2.24176	2.45196	3.84237	3.46983
E2F1_1	E2F1	E2F	protein_coding	26.8301	27.1681	19.1185	19.4311	19.8215	20.3799	36.8577	44.8378	5.82141	5.75167	56.1863	73.0002	56.2014	63.8108	59.6331	54.5971	47.757	48.3506	60.6064	52.9613	44.4543	50.3564	49.9076	48.2776	47.4606
E2F3_1	E2F3	E2F	protein_coding	14.5033	15.1613	16.5308	17.0319	10.6628	10.2173	17.9346	15.3431	1.90143	1.61272	6.16233	7.03805	6.57487	7.53918	7.36177	7.43168	7.98657	7.51368	6.54533	9.84	10.0642	7.98902	9.47061	9.42403	8.37835
E2F4_1	E2F4	E2F	protein_coding	24.9215	24.5704	32.3296	35.5823	25.2242	29.56	31.3839	35.8322	10.909	10.4746	22.592	28.2197	23.9245	25.6251	26.7782	28.5636	25.6766	25.5269	25.7109	31.404	29.509	27.6283	29.0152	27.7631	26.5593
E2F5_1	E2F5	E2F	protein_coding	9.08077	7.21476	28.8168	37.5243	6.50838	7.95194	9.88157	11.321	2.57116	2.55742	15.3127	17.8123	12.9589	17.1984	17.0091	19.807	14.9665	13.2578	15.139	15.5293	12.8251	12.3306	15.3207	16.6292	13.039
E2F6_1	E2F6	E2F	protein_coding	27.8635	29.9722	27.4631	29.0383	24.1293	25.8749	28.4464	31.7929	10.591	9.09996	39.4132	38.6033	41.3679	36.6784	41.6161	40.8734	41.9191	44.7397	42.2503	44.6963	41.3924	45.2388	36.3048	41.5945	36.9053
E2F7_1	E2F7	E2F	protein_coding	18.5281	17.3741	10.0832	10.3974	16.0009	10.5098	20.0881	17.9151	4.68751	4.8057	6.77729	9.1726	7.36371	8.77495	7.13607	5.01487	7.65376	8.77305	9.9191	11.1104	11.2984	9.02657	12.2738	9.92812	7.72264
E2F8_1	E2F8	E2F	protein_coding	42.6606	37.6381	18.7475	23.2098	21.6036	18.2815	31.5381	30.5344	4.15096	4.55426	19.7828	23.6082	22.4607	22.2814	22.9996	16.2778	20.6679	24.2171	20.0976	23.9762	25.6392	18.6398	18.8117	20.621	17.5525
TFDP2_1	TFDP2	E2F	protein_coding	47.3615	52.1858	25.1835	28.0286	32.5291	28.2774	36.8199	34.5908	6.89719	7.17666	22.9629	25.9884	24.9789	26.1741	25.2099	22.3174	27.4608	28.2633	27.3301	31.7187	30.053	26.1157	26.4802	27.0958	27.4043
AR_1	AR	ESR-like	protein_coding	2.74313	3.17028	5.33877	5.39365	6.40709	13.0192	2.27948	2.74563	2.17896	2.61664	72.4665	69.2506	71.8252	68.8117	65.7919	74.2797	66.5986	62.7257	59.2091	47.3793	44.566	57.2935	31.419	43.082	42.1485
ESR1_1	ESR1	ESR-like	protein_coding	0.441539	0.401701	0.028758	0	3.21515	6.27296	0.02821	0.046105	0.249071	0.307255	5.60056	6.33891	9.38707	4.52758	8.30578	5.28719	7.2347	7.42095	8.36992	9.67814	7.93926	6.07689	4.42839	6.6351	6.8684
ESRRB_1	ESRRB	ESR-like	protein_coding	0.178188	0.135347	0.510744	0.643566	0.113976	0.17399	1.87355	2.62603	5.485	4.8825	0.114219	0.332999	0.4168	0.331351	0.264203	0.4733	0.186662	0.215827	0.219745	0.876593	1.40975	0.807672	2.30074	1.22915	1.85976
ESRRG_1	ESRRG	ESR-like	protein_coding	14.9045	12.6663	16.6565	16.1494	12.1761	18.2153	8.28383	19.0772	23.2887	27.429	6.24127	6.03545	5.54731	6.13813	9.04023	6.74031	6.37731	6.9106	5.73514	6.48718	7.54904	7.70937	10.1164	8.91407	8.07415
NR3C1_1	NR3C1	ESR-like	protein_coding	91.2518	91.9685	67.2155	73.4711	101.929	122.124	88.9313	97.4027	42.3899	43.5534	21.2119	17.8823	20.1653	19.5383	21.1216	20.4961	23.7492	20.0559	20.3731	21.6754	20.6966	19.9491	15.4291	19.4174	19.3606
NR3C2_1	NR3C2	ESR-like	protein_coding	47.4701	49.6694	46.3451	44.7063	113.258	182.953	42.7601	51.7247	16.3123	17.5875	12.6442	16.5547	14.8531	14.4426	16.3856	17.5479	20.1956	17.9218	19.7594	19.5667	18.0458	17.4424	18.2425	21.1204	16.0857
EHF_1	EHF	ETS	protein_coding	0	0	2.13592	2.36342	0.092563	0	7.26648	11.7047	32.6072	40.6764	2.05623	2.24689	3.26079	4.79889	5.55468	2.47472	11.1482	12.875	13.5554	20.5542	25.9991	17.6646	33.1122	23.0586	22.0481
ELF1_1	ELF1	ETS	protein_coding	13.4604	11.98	24.4487	23.533	14.1627	16.7872	23.6379	24.249	13.9958	12.7607	48.0036	50.3214	50.2772	45.9972	48.2933	50.5433	49.0015	45.8064	44.6891	41.7143	42.9436	38.3118	35.4012	40.0861	35.3969
ELF2_1	ELF2	ETS	protein_coding	33.5722	32.3535	62.5725	67.8888	87.1226	39.5644	26.3193	28.9196	6.76421	13.0371	38.3123	38.228	72.1529	72.6169	77.4189	34.2373	67.4336	64.0715	61.907	70.5919	27.476	65.9873	58.5382	65.8018	57.7876
ELF3_1	ELF3	ETS	protein_coding	0.252537	0	8.28887	10.2519	0	0.215083	1.22645	4.02466	4.24405	7.14596	3.1349	2.7266	2.04794	3.34057	3.74812	6.04725	3.19674	2.61349	2.01376	2.41564	4.07886	2.50387	2.7098	3.27066	7.2184
ELF5_1	ELF5	ETS	protein_coding	0.704456	0.048033	16.1784	21.5292	0.049524	0.173504	17.701	25.0864	9.01745	4.79065	1.93626	1.3655	2.14202	2.7475	2.51753	4.35514	3.6607	2.07748	2.71219	3.48728	4.96772	3.90226	3.55358	3.09207	4.88595
ELK3_1	ELK3	ETS	protein_coding	47.9888	51.6889	29.0283	29.8403	45.9743	44.6429	24.5237	20.7231	15.4239	16.0459	36.2227	36.4264	37.3495	36.9599	41.4044	40.8713	36.9675	39.1868	34.4786	38.5647	36.3695	34.1974	30.0216	30.9592	32.2986
ERG_1	ERG	ETS	protein_coding	24.3462	44.4899	0.121945	0.068249	30.5867	37.431	0	0.095514	2.82983	3.22725	22.9211	18.1768	16.6282	18.3983	19.9423	20.0674	20.728	20.4611	20.7755	17.1187	15.515	15.2243	11.8366	14.1705	14.9998
ETS1_1	ETS1	ETS	protein_coding	306.348	218.474	23.1102	15.5317	97.5914	88.7195	20.0992	13.7444	9.93353	10.317	38.9909	40.4709	36.1213	42.5833	52.5867	50.439	44.554	39.959	43.9607	38.7158	41.2875	36.0072	28.7984	35.1744	34.3078
ETS2_1	ETS2	ETS	protein_coding	111.061	132.913	7.63007	6.52974	88.4303	82.3485	9.27268	14.8846	61.8078	55.6294	95.1799	104.579	100.359	97.821	105.74	106.449	102.276	101.701	105.5	87.4757	93.6811	84.6446	84.4667	98.3677	80.9048
ETV1_1	ETV1	ETS	protein_coding	40.5649	46.6418	26.9667	40.8301	61.4582	56.0945	38.3817	40.2856	4.43994	3.29854	26.8959	24.108	24.7203	23.0997	24.6104	18.0516	25.9446	25.5933	22.6784	22.4043	22.431	21.1613	15.0418	18.8875	20.3162
ETV4_1	ETV4	ETS	protein_coding	15.8614	32.6854	23.7534	36.6978	24.7944	22.5891	27.0291	27.582	4.76649	5.46354	18.0941	13.1723	13.6694	21.2676	14.5706	16.6957	17.333	17.9418	15.9502	20.4896	15.769	16.1247	15.409	17.3416	15.8388
ETV5_1	ETV5	ETS	protein_coding	25.5385	31.794	122.478	178.922	43.6888	55.4276	96.5583	95.3394	8.17778	9.22057	20.9704	15.6544	19.4922	18.4822	22.3735	18.5539	24.0114	26.9251	32.1187	28.6171	30.6372	24.5389	19.3024	18.9382	27.1525
ETV6_1	ETV6	ETS	protein_coding	16.3012	18.759	9.30184	10.4563	20.7066	33.1779	10.6444	16.7826	6.79674	6.20926	29.1773	29.2093	30.6956	27.2084	27.0514	35.0004	26.5426	28.2323	26.1913	27.5631	28.0328	30.6827	22.3931	27.551	22.8952
FLI1_1	FLI1	ETS	protein_coding	37.1296	28.7312	0.235626	0.101063	22.0913	19.3218	0.10163	0.02807	3.51987	3.58696	37.4522	37.4338	36.4964	38.2755	42.4753	42.3733	39.1146	42.8192	39.6396	42.0033	39.7367	38.8684	24.2778	31.0663	32.0107
GABPA_1	GABPA	ETS	protein_coding	76.3604	77.5443	54.6741	53.2591	84.9983	67.0402	85.9539	58.886	23.4066	20.1819	81.7656	88.8487	87.9175	85.8866	89.2384	74.759	93.4103	95.4114	89.1553	97.0545	92.5552	87.741	83.1853	89.3259	79.987
SPI1_1	SPI1	ETS	protein_coding	6.49233	5.15806	0.059404	0.050694	5.98127	5.36936	0.15793	0.110885	0.905979	0.577626	37.8364	33.755	25.2914	28.0517	37.2857	33.7337	32.0912	28.3715	23.633	22.8935	43.8794	15.8154	19.0894	22.3486	16.8279
FOXB1_1	FOXB1	Fork_head	protein_coding	0.523813	0	38.8568	36.7062	0	0	2.78037	0.779684	0	0	0	0	0	0	0	0	0	0	0	0	0	0	0	0	0
FOXI3_1	FOXI3	Fork_head	protein_coding	0.023597	0.146265	1.83466	11.0005	0.520611	0.127833	46.952	27.8001	37.7965	29.5984	0.625861	1.38656	0.730285	4.56773	4.00607	2.19156	7.74729	7.80031	13.0826	44.1763	45.717	34.2184	49.3283	39.8878	47.6872
FOXJ1_1	FOXJ1	Fork_head	protein_coding	0.17522	0.07453	0.076125	0	1.59282	3.46366	0.151652	0.472517	0.670174	0.997169	0.419122	0.552973	0.461992	0.632127	0.649259	0.435155	0.455821	0.682843	0.79844	0.801719	1.47057	0.678263	0.905542	0.778017	0.526744
FOXK2_1	FOXK2	Fork_head	protein_coding	0	0	0	0	0	0	0.107716	0	1.27066	0.3422	0	0	0	0.349256	0.339016	0	0.189693	0.293055	0	1.53349	2.0714	3.82386	1.8601	2.57691	5.12373
FOXM1_2	FOXM1	Fork_head	protein_coding	42.1157	42.0294	31.2316	31.3014	30.6943	36.5838	42.2439	58.4898	4.10812	3.70934	25.745	28.4044	27.549	30.2859	31.9218	19.717	31.661	30.734	31.4832	32.7956	28.2217	23.9197	27.0789	26.3363	23.1098
FOXN1_1	FOXN1	Fork_head	protein_coding	0.44706	0.239174	8.81842	6.25913	0.040103	0.096085	2.1235	5.13108	36.2884	37.0668	3.38835	4.29994	3.14389	3.8119	2.66707	4.25792	4.40126	4.62351	4.94481	9.03842	11.7904	8.62223	13.6415	12.0114	11.4053
FOXN2_1	FOXN2	Fork_head	protein_coding	15.5021	13.7177	12.0138	12.7919	16.6678	18.658	16.0055	16.0459	10.8175	9.53013	13.3804	19.3465	16.9905	17.4028	16.8503	18.5274	17.7363	14.9801	14.0842	16.3362	16.8252	17.191	17.7973	20.3518	15.1324
FOXN3_1	FOXN3	Fork_head	protein_coding	32.8846	34.7992	56.4962	59.3084	33.1044	37.6936	45.6032	44.4258	17.1159	17.5611	24.6012	22.7326	26.6382	24.7541	29.2247	27.0238	30.2063	26.5262	27.1457	28.025	24.4118	24.9714	22.9945	25.2176	26.7318
FOXO1_1	FOXO1	Fork_head	protein_coding	6.88013	7.09837	5.20919	4.80105	15.2332	15.5265	6.71483	8.84418	18.3073	15.5386	20.0863	24.7088	23.3661	24.9298	26.1767	27.305	26.2462	22.6227	27.936	20.3479	23.2551	19.7429	19.8565	27.6042	21.649
FOXO3_1	FOXO3	Fork_head	protein_coding	52.2844	53.581	14.4185	17.0564	34.0074	41.3814	18.6886	23.5534	24.9854	24.5418	19.0152	16.0651	23.9281	18.3673	16.7402	16.64	30.923	18.5947	17.5404	20.684	17.8527	22.8209	12.907	15.7312	20.055
FOXO4_1	FOXO4	Fork_head	protein_coding	22.3342	22.0182	25.1494	24.5383	33.471	35.6123	29.5246	30.0181	21.2699	20.7442	51.783	48.112	56.3848	44.3894	52.4799	53.4432	53.1319	52.1555	52.1525	52.1204	49.1742	54.129	40.4211	42.8497	50.2297
FOXO6_1	FOXO6	Fork_head	protein_coding	26.1648	24.8083	4.50264	4.7677	49.4565	70.2827	6.26182	6.33125	7.78146	7.67565	56.5857	57.8326	55.0582	44.9461	44.0861	70.6849	48.033	39.2547	39.5276	30.6071	23.383	32.0878	26.252	35.0605	28.9801
FOXP1_1	FOXP1	Fork_head	protein_coding	78.7161	69.0066	45.0886	52.4079	43.0033	52.8542	62.0386	85.0553	33.2352	32.1995	34.2845	31.3822	36.5764	32.5299	36.8121	33.1537	36.359	32.5082	33.1433	25.9716	26.0022	24.9366	20.3303	25.0491	24.3325
FOXP2_1	FOXP2	Fork_head	protein_coding	48.1718	50.5955	23.4382	29.9059	39.1412	45.1149	19.6567	13.8176	1.16735	0.570864	6.03912	5.54947	6.01183	5.45249	6.91077	5.07201	7.66811	4.94192	5.2298	6.5329	3.08705	4.72842	2.79681	3.5479	3.97539
FOXP4_1	FOXP4	Fork_head	protein_coding	60.205	50.8955	39.0911	47.0355	13.2208	15.1906	30.5432	37.6861	9.05063	10.5776	11.1016	12.5136	9.97392	11.299	12.2089	14.7218	12.6329	11.0019	13.3499	13.5109	11.9535	11.4408	11.7368	10.1905	10.7974
FOXS1_1	FOXS1	Fork_head	protein_coding	0	0.218212	0	0	1.3906	1.64597	0	0	0.93933	1.00352	8.36015	5.7314	9.3391	9.29981	0	10.4906	5.07817	5.88465	6.10862	4.92027	3.51105	0	6.02482	5.33067	5.5315
PAXBP1_1	PAXBP1	GCFC	protein_coding	33.564	31.3106	29.4655	29.5111	30.9049	38.0274	36.6009	42.7399	11.7215	9.56358	42.9149	45.6336	42.4518	45.5007	45.0616	49.0257	48.8467	49.0401	47.998	50.6363	47.1326	45.9733	51.6093	57.0565	44.2096
GCM1_1	GCM1	GCM	protein_coding	0.304085	0.033825	1.59368	1.67808	0.039268	0.232583	0.965881	0.885297	4.22849	5.72803	0.718394	1.07789	1.21957	0.833514	1.32826	0.929875	0.688634	0.176062	0.750299	0.496324	0.34042	0.323576	0.980073	0.428443	0.393527
NR6A1_1	NR6A1	GCNF-like	protein_coding	4.73472	4.72396	10.2147	11.4208	3.90013	8.78583	6.30887	12.8805	2.70039	2.51302	5.58068	6.01783	6.22539	5.75689	6.41426	7.1601	6.25863	6.21839	6.72925	6.49123	6.29773	5.9997	6.55614	6.33038	6.17658
GTF2I_1	GTF2I	GTF2I	protein_coding	32.8245	34.3632	32.1359	30.9036	25.1713	33.0197	25.1421	29.0134	8.39726	8.39226	26.1777	22.6551	26.7914	22.8962	24.1761	25.0087	23.0045	31.919	26.3228	24.1274	26.1662	26.9198	20.6179	23.1257	20.1845
GTF2IRD1_1	GTF2IRD1	GTF2I	protein_coding	64.3882	67.3653	28.1047	26.4603	39.7305	49.4948	24.3256	36.0678	46.7994	55.9082	14.7426	11.9474	14.537	12.4616	13.0626	13.8039	13.5338	13.6031	17.1863	19.7692	20.0874	18.5497	22.5691	21.6561	17.9358
HBP1_1	HBP1	HMG	protein_coding	27.9467	32.1226	36.6842	43.8779	53.934	60.4028	40.5844	46.7871	55.2941	46.2818	98.7048	72.2334	101.711	69.3067	88.2121	71.131	89.5872	103.545	95.3388	85.9522	92.4563	98.1661	67.5905	77.6172	76.7502
HMG20A_1	HMG20A	HMG	protein_coding	66.7125	63.4885	55.2211	55.8313	68.2767	60.4009	74.4994	53.361	13.7949	13.2624	33.3627	35.0497	35.9328	33.8775	34.754	31.316	41.8066	42.0115	41.8783	45.3753	45.4559	40.9334	40.4606	44.3412	40.2556
HMG20B_1	HMG20B	HMG	protein_coding	35.5163	35.7956	44.923	45.0719	33.0212	45.3791	43.9168	52.13	21.6479	23.7817	33.526	36.241	31.0412	32.7505	37.0059	40.1586	40.4532	37.1825	36.0775	39.3534	35.2086	38.8225	35.3902	33.9031	35.7764
HMGB1_1	HMGB1	HMG	protein_coding	923.258	976.228	760.646	759.711	953.702	805.619	1235.04	1035.57	129.104	121.074	420.009	442.194	461.534	444.316	451.911	356.506	467.686	488.868	482.562	555.162	536.301	475.621	457.999	483.757	416.601
HMGB2_1	HMGB2	HMG	protein_coding	521.505	498.586	335.933	313.926	350.254	245.697	487.774	433.837	50.6412	59.3236	170.794	151.094	174.238	174.985	180.655	107.858	177.127	210.244	187.71	245.369	228.079	193.147	199.698	221.684	158.051
HMGB3_1	HMGB3	HMG	protein_coding	543.539	513.08	446.586	472.248	435.181	354.2	525.232	411.159	78.3349	84.4837	248.249	266.427	261.275	246.949	233.245	184.386	269.502	275.497	284.665	305.193	294.083	269.615	285.489	294.069	240.49
HMGXB3_1	HMGXB3	HMG	protein_coding	11.7676	10.7989	17.5817	19.3333	11.0082	17.6586	14.261	20.962	6.68203	6.35489	14.8648	16.4605	14.6995	14.2161	15.0088	16.724	15.944	16.7869	15.6975	18.8477	15.6645	14.7523	16.0153	17.6307	15.4739
LEF1_1	LEF1	HMG	protein_coding	302.343	390.664	924.826	1307.21	418.44	503.544	1037.19	695.63	28.5661	27.4731	4.3451	4.64522	3.97866	12.3855	10.3097	7.202	19.3813	23.8099	31.6393	61.8866	63.7151	44.103	49.9339	50.5787	46.8165
PBRM1_1	PBRM1	HMG	protein_coding	68.3171	68.9505	75.5523	82.0886	67.6929	78.1589	86.5482	86.864	16.5322	17.0075	33.554	32.5022	32.1308	31.5995	33.3182	31.4026	36.6129	32.1724	34.0769	40.0103	38.5826	35.2329	35.5533	37.3988	33.8307
PMS1_1	PMS1	HMG	protein_coding	23.3409	22.0586	15.6103	16.2801	15.0403	18.1899	17.0504	17.5873	6.60087	4.78581	23.0208	24.8503	22.3631	24.7099	24.5413	24.5878	27.4802	29.464	28.7902	23.157	26.4567	27.048	29.5621	27.7545	22.1095
SMARCE1_1	SMARCE1	HMG	protein_coding	255.677	269.498	279.705	263.278	248.192	224.64	284.431	274.01	72.2934	75.8303	132.225	144.825	129.491	133.156	135.442	127.2	140.716	139.618	149.222	169.902	167.218	156.313	150.175	148.312	147.185
SOX10_1	SOX10	HMG	protein_coding	21.7557	17.4793	34.8068	31.4102	12.486	15.0511	36.4166	28.8415	1.18794	1.49887	26.6032	21.7579	29.0971	15.8123	18.9289	29.7229	14.6696	17.5206	20.3781	17.1225	11.2537	20.1598	9.09577	16.7569	12.2632
SOX12_1	SOX12	HMG	protein_coding	0.389622	0.546494	0.144349	0.333921	1.55919	4.19468	0.342794	0.785136	0.279753	0.243938	0.648322	0.464023	0.227959	0.332632	0.51646	0.353343	0.368327	0.332149	0.635925	0.343557	0.38966	0.262011	0.395226	0.37155	0.147294
SOX13_1	SOX13	HMG	protein_coding	6.01597	6.71261	2.65841	2.28294	23.6019	40.376	1.48724	1.94868	2.50164	2.44812	6.66078	7.06281	5.5707	7.22052	8.80046	9.16214	8.1335	9.38108	10.7235	14.9187	12.337	10.6373	9.50584	10.5331	10.2931
SOX14_1	SOX14	HMG	protein_coding	2.07376	0.444507	91.3209	94.3451	0.286551	0.186215	29.9851	36.9089	0.757476	1.65435	0.344761	0.095088	0	0	0.153966	0	0.292596	0.159288	0.150997	0.505079	0.913037	0.403012	1.84108	1.54763	0.90897
SOX17_1	SOX17	HMG	protein_coding	5.53765	6.71753	0	0	10.2988	7.55007	0	0	0.54243	0.7874	21.0075	13.2967	14.8457	19.328	16.1985	15.6205	14.9886	16.6923	19.4895	12.0131	10.933	12.3175	10.1212	13.3163	11.1553
SOX18_1	SOX18	HMG	protein_coding	28.1586	28.7204	0.036627	0	329.248	445.695	0.290302	0	16.6567	26.0817	43.0072	47.3903	53.8701	66.1112	57.7209	57.0002	59.0376	80.14	71.1521	80.0234	70.1264	75.5731	56.6025	61.3019	61.2139
SOX21_1	SOX21	HMG	protein_coding	6.81921	3.34339	128.342	158.988	3.72033	3.43305	214.329	244.739	108.319	113.27	30.5903	39.1933	38.6499	60.1637	57.9076	44.6496	77.8443	98.2959	117.387	182.976	236.986	199.78	233.396	225.5	242.755
SOX4_1	SOX4	HMG	protein_coding	160.235	269.98	169.977	193.572	291.628	521.784	127.633	212.763	41.3162	44.3226	35.4249	40.4628	37.6185	38.5891	53.632	41.6256	51.4478	44.4892	58.4551	77.7064	71.1689	67.6014	69.2311	71.9698	63.182
SOX5_1	SOX5	HMG	protein_coding	6.32827	3.86581	20.1291	8.58587	3.01226	5.23068	10.7104	13.7031	0.889225	0.923077	2.0817	1.87451	2.34828	2.60821	2.21659	2.90057	2.85209	2.43188	2.40561	2.69291	1.81573	1.69354	1.37129	1.79468	1.86172
SOX6_1	SOX6	HMG	protein_coding	3.57431	3.27624	43.111	52.3297	49.3887	76.3781	45.315	45.7335	3.23141	1.90772	1.78841	1.87593	2.70494	1.57569	2.18479	1.98506	1.86457	0.950214	2.21672	1.27089	0.758429	1.14856	1.69497	1.12133	1.15071
SOX8_1	SOX8	HMG	protein_coding	3.19805	1.73777	0.282686	0.214411	13.0171	11.1788	2.0434	2.36564	1.10013	0.897801	8.77858	8.24479	12.9014	10.9237	9.25727	9.53579	9.63017	5.2883	8.18605	5.77059	3.88901	7.42651	3.20043	4.46986	5.40502
SOX9_1	SOX9	HMG	protein_coding	1.82853	0.913566	36.7523	57.1183	2.06565	1.37976	48.5106	76.0572	17.6254	15.3546	8.06415	6.61654	5.56442	9.4108	8.63618	8.06966	9.56072	9.1574	12.858	10.0023	8.42075	8.78386	8.46641	10.516	7.85751
SSRP1_1	SSRP1	HMG	protein_coding	170.102	162.342	176.244	176.692	133.672	141.689	185.783	190.293	40.2092	42.2389	83.0379	87.5076	81.4148	86.2819	86.674	78.0444	92.9713	87.0338	96.7752	111.877	108.919	101.069	105.035	96.0131	98.2493
TCF7_1	TCF7	HMG	protein_coding	9.12643	6.70796	1.17411	1.57984	43.1449	57.5053	2.99368	7.7676	93.8155	126.218	2.54506	2.64467	2.41553	6.35772	6.02865	5.49954	17.4106	13.3591	22.5181	55.367	73.0115	47.0148	84.4605	61.8975	64.5126
TCF7L2_1	TCF7L2	HMG	protein_coding	32.0669	38.605	46.2819	53.0995	197.588	290.735	47.5094	73.4542	14.0949	12.7018	15.5094	12.4634	15.711	15.5228	15.5021	15.2551	14.2889	16.4589	14.7875	17.7534	16.1233	18.5691	9.06066	12.4218	13.4253
TFAM_1	TFAM	HMG	protein_coding	96.9851	103.028	103.887	112.29	90.0051	71.5919	122.204	107.137	26.6693	23.7204	86.1552	89.0562	86.9998	83.1469	82.5337	78.5641	75.4421	78.2389	82.9401	93.3595	85.9168	85.9762	86.3203	86.4688	76.5389
TOX3_1	TOX3	HMG	protein_coding	1.46627	1.29869	7.27718	6.63076	1.23822	2.06533	2.68253	2.40201	0.301434	0.189356	0.565661	0.508633	0.418053	0.433226	0.704402	0.621033	1.29979	0.913679	0.787665	1.13859	0.437129	0.990531	0.830042	0.776318	0.781324
WDHD1_1	WDHD1	HMG	protein_coding	45.4764	43.7187	35.1339	33.8977	32.4963	25.228	50.6403	42.0378	3.15624	3.56847	14.5251	16.442	16.5592	17.4801	17.4392	8.76748	16.1472	16.6816	17.5755	20.0639	19.2301	16.3058	16.2448	16.4402	14.3563
HMGA1_1	HMGA1	HMGA	protein_coding	93.1423	102.208	88.5034	103.245	83.5807	85.3512	103.77	117.246	48.0144	51.0093	40.7879	43.5401	33.2174	37.2706	43.2733	45.5538	34.6959	43.134	42.3079	50.2642	56.4469	50.9938	55.0727	52.1069	52.1269
HMGA2_1	HMGA2	HMGA	protein_coding	658.241	369.738	60.1372	63.6796	178.368	217.521	96.8546	93.5142	12.0985	12.1177	6.11468	6.38305	6.21764	9.35675	9.78307	6.52118	15.0331	17.8424	15.9761	11.2352	10.2204	8.73154	17.338	14.8165	8.59563
ADNP_1	ADNP	Homeobox	protein_coding	147.402	143.887	141.55	153.561	158.647	219.669	126.539	158.589	31.1265	26.1639	98.9668	106.902	104.667	95.452	109.085	99.5049	116.568	106.329	110.031	117.226	104.215	96.1353	102.798	118.355	90.8054
ALX4_1	ALX4	Homeobox	protein_coding	8.54605	4.95135	0	0	42.4034	55.8073	0.135448	0	2.35142	2.82228	1.70363	2.63522	1.17971	4.76803	2.83683	2.81259	4.21621	4.85759	5.74139	6.90083	7.24823	6.09854	6.59389	6.15673	5.44672
BARX2_1	BARX2	Homeobox	protein_coding	3.53204	1.87328	135.278	201.477	2.28208	3.65758	115.862	127.329	97.1399	84.1275	150.872	182.151	152.895	175.327	168.011	195.03	228.046	238.708	254.567	227.805	198.808	171.72	226.646	260.859	206.772
DLX2_1	DLX2	Homeobox	protein_coding	1.21862	1.71061	0.173697	2.12154	0.630723	0.46355	6.57329	4.22846	1.8995	1.17053	0.109679	0.080505	0	0.071036	0	0.148513	0.082502	0.145123	0.243889	1.7804	2.04627	1.67036	1.47437	1.5607	1.55827
DLX3_1	DLX3	Homeobox	protein_coding	1.29427	0.390154	43.992	37.7843	1.95573	4.12194	111.876	165.689	298.554	352.587	38.21	38.0966	33.3834	47.9782	42.1399	50.535	52.5518	55.7302	54.8903	65.98	86.6169	79.8535	103.523	92.6208	97.0561
DLX4_1	DLX4	Homeobox	protein_coding	0	0	1.6523	1.11083	0	0.218704	9.51013	27.813	121.315	120.469	5.0383	5.84172	5.18491	8.61027	8.6127	14.3299	16.2132	11.6979	19.1157	28.8327	38.0027	29.6442	55.5837	42.8361	47.0889
DLX5_1	DLX5	Homeobox	protein_coding	9.70349	29.201	29.7073	31.7597	21.0691	20.3491	89.2205	126.924	133.043	107.341	13.1619	14.3865	11.9123	14.576	13.3522	16.6899	11.284	15.2126	16.6485	37.2734	44.0041	43.7542	52.6519	44.1094	57.1295
DMBX1_1	DMBX1	Homeobox	protein_coding	1.63959	1.98031	0	0	5.61763	1.32044	0.049055	0.053416	0.122287	0.10277	0.906501	0.830392	1.14533	0.530131	0.561157	0.662813	0.423408	0.431247	1.07813	0.258787	0.169214	0.443228	0.182924	0.355037	0.387551
EMX1_1	EMX1	Homeobox	protein_coding	0.491808	0.111994	16.951	17.948	0	0	1.56859	2.17332	0.080078	0.38712	0	0	0	0	0	0	0	0	0	0	0	0	0	0	0
EMX2_1	EMX2	Homeobox	protein_coding	101.244	104.406	26.5998	28.0285	95.3289	109.421	13.9823	36.9254	15.588	14.5892	85.9827	91.3058	82.6124	77.1798	85.2196	72.6608	68.718	62.4771	72.7727	56.9699	50.4441	56.4498	39.3293	51.6372	53.3854
EN1_1	EN1	Homeobox	protein_coding	21.7239	17.0442	0	0	22.4381	34.5067	0.056273	0	0.978513	0.411337	5.14239	2.86354	3.38597	6.39723	6.42653	5.72887	5.36665	5.94488	2.5804	8.31197	2.48146	6.42581	1.49471	3.95842	5.54559
GSC_1	GSC	Homeobox	protein_coding	6.60182	11.8587	0	0	2.17993	0.971479	0	0.614301	0.028414	0.028619	1.78857	0.379902	0.88954	1.48945	1.2115	1.09434	0.524801	0.990666	1.19887	1.18386	0.969302	0.640468	0	0.477443	0.777078
HDX_1	HDX	Homeobox	protein_coding	23.0303	23.339	29.5798	30.2119	17.8098	21.8777	20.1694	22.7096	4.04673	3.64068	8.35696	9.99378	9.67313	8.10858	9.53018	8.62983	11.516	6.84052	9.78589	8.55494	7.34613	8.607	9.48752	10.273	8.42097
HESX1_1	HESX1	Homeobox	protein_coding	2.70805	2.26677	2.7084	3.32851	1.59187	3.60975	2.57848	5.45528	1.68011	1.40551	8.05824	5.89179	4.78033	8.70603	5.49825	6.48317	7.16295	10.3086	8.7193	7.22803	7.84545	6.04109	8.78684	11.4724	5.73055
HHEX_1	HHEX	Homeobox	protein_coding	10.917	13.0316	0.196583	0.066978	11.8481	11.3191	0.165119	0.185273	10.0042	8.73538	28.4642	30.7257	27.656	31.3501	34.0583	35.564	21.5767	32.2673	19.6546	27.9988	30.496	23.1335	21.4563	20.9878	26.0334
HLX_1	HLX	Homeobox	protein_coding	5.47781	6.57785	0	0	10.5612	13.9663	0	0.042725	1.08918	1.38456	8.60611	9.5953	10.1475	12.0662	13.9398	13.768	10.0042	7.927	8.2519	10.5049	7.44517	8.78789	6.1053	10.1386	6.44773
HMBOX1_1	HMBOX1	Homeobox	protein_coding	49.2031	44.6633	52.1477	64.7052	43.1245	70.6966	46.5803	70.6284	10.0869	8.80699	10.7002	12.4107	12.8188	9.09738	9.08284	10.3382	11.461	10.7018	10.38	11.2678	10.777	8.82223	11.3712	13.1485	8.58943
HMX1_1	HMX1	Homeobox	protein_coding	15.4127	15.0567	0.818225	0.942265	11.9692	13.167	0.213483	0.482474	2.00507	1.45613	4.92728	6.85339	6.16354	3.91571	4.89145	4.31652	3.69787	6.57785	7.22589	2.69327	5.80806	4.38422	5.75057	4.91346	3.40836
HOPX_1	HOPX	Homeobox	protein_coding	1.12757	0.380123	0.914603	1.33229	1.43343	0.561866	3.05261	7.12313	24.4769	18.341	386.363	342.345	440.155	523.893	424.04	317.724	515.002	351.75	380.061	300.638	263.145	349.87	211.631	269.594	258.883
HOXA1_1	HOXA1	Homeobox	protein_coding	2.68285	1.54424	50.17	54.4533	0.786913	2.67935	14.5249	19.1845	3.17726	3.43248	0.822685	1.2555	1.27922	1.27702	1.2606	1.24799	1.04288	1.46681	1.46758	1.8845	2.78976	2.09974	2.26401	2.61089	2.4475
HOXA10_1	HOXA10	Homeobox	protein_coding	32.6908	31.0462	5.24264	7.93851	27.9606	35.992	7.55644	14.4185	1.46187	1.38694	14.0854	11.3861	7.36109	20.2111	14.6283	19.1389	10.7445	13.5595	12.668	17.1965	16.8775	17.6727	14.3954	15.2687	15.0138
HOXA11_1	HOXA11	Homeobox	protein_coding	10.5492	8.5952	0.026611	0.151178	5.87657	8.36028	0.171269	1.93848	0.34466	0.200244	0.918338	0.145392	0	4.12248	1.88087	1.76641	1.87271	0.989228	0.193243	4.31425	0.698316	4.54009	0.923352	2.67662	4.50944
HOXA2_1	HOXA2	Homeobox	protein_coding	10.3594	10.6568	97.5782	125.785	7.83525	41.1097	30.8698	58.7523	5.84017	5.79968	12.0235	9.90864	10.6753	10.5629	8.83926	14.6729	11.8679	11.1469	14.0179	14.5061	13.4275	13.5718	9.82481	13.0872	10.6081
HOXA3_1	HOXA3	Homeobox	protein_coding	54.6078	52.9687	95.007	111.744	64.5735	157.967	43.3925	94.4161	10.1646	11.3974	37.1271	27.746	26.8459	27.9958	25.4727	31.865	25.0237	34.6277	32.8692	33.2987	26.9668	31.5833	28.2942	32.907	26.656
HOXA4_1	HOXA4	Homeobox	protein_coding	23.9049	18.1719	90.3278	108.814	16.2923	55.0307	40.6427	69.5088	6.41141	7.85237	25.9758	24.5832	27.3241	23.1981	27.2312	27.4586	27.8674	24.2504	30.4178	28.5348	30.9908	25.6436	25.9383	27.4548	19.5014
HOXA5_1	HOXA5	Homeobox	protein_coding	37.9938	35.885	64.8706	79.534	22.0133	66.8709	31.4834	56.4036	5.10395	6.54267	22.1924	24.4734	27.2622	24.3932	24.5774	25.5951	25.8599	25.8254	31.3022	24.1838	19.174	22.5576	23.0763	27.5467	15.0684
HOXA6_1	HOXA6	Homeobox	protein_coding	42.7557	36.1108	64.6867	70.4453	23.7575	81.1068	27.7339	60.1973	3.79159	3.515	11.4998	11.6679	10.5348	12.2059	13.1167	11.831	10.0292	11.4338	13.6601	11.502	10.181	9.2797	12.7879	13.0978	9.14238
HOXA7_1	HOXA7	Homeobox	protein_coding	14.5671	17.338	66.7257	69.8606	21.2716	24.2919	34.9617	27.258	4.78685	4.24978	54.8147	53.3942	56.2553	45.2809	51.7469	51.5239	48.0144	58.374	52.3377	45.6815	45.0409	46.4077	35.5915	38.6528	40.929
HOXA9_1	HOXA9	Homeobox	protein_coding	47.6923	55.3036	48.546	54.8116	40.3808	63.8614	36.5802	51.5267	6.26094	6.22961	37.3497	34.9288	36.4129	44.1836	36.004	37.2225	32.8609	44.5452	38.6132	52.4988	41.762	52.0791	38.213	46.4713	37.327
HOXB2_1	HOXB2	Homeobox	protein_coding	14.0627	17.6226	0.09413	0	17.5905	25.919	0.129527	0.444871	0.990159	0.637741	7.97428	8.40879	7.69268	8.80927	6.17551	7.47125	8.02613	8.03012	6.35967	8.34708	7.0585	12.2028	5.60781	7.12523	7.10123
HOXB3_1	HOXB3	Homeobox	protein_coding	41.7734	49.5203	8.00749	9.01693	44.0444	103.049	3.45125	9.11241	2.67251	2.47948	16.8687	10.5148	15.0142	10.3308	13.3251	12.4598	13.1768	13.9483	16.9798	18.0637	15.2484	16.1197	12.334	15.5907	13.0424
HOXB4_1	HOXB4	Homeobox	protein_coding	41.1049	54.4771	14.1492	19.5298	44.4653	54.0509	10.4784	15.8932	3.65774	2.13467	61.3596	61.8552	61.9402	52.7155	61.1997	71.3416	55.9787	60.6262	76.6958	57.3534	57.0046	58.1264	52.5143	60.4325	52.6191
HOXB5_1	HOXB5	Homeobox	protein_coding	74.756	68.396	2.96949	4.2954	37.813	62.8391	3.7074	6.07076	4.14584	1.93246	27.1963	28.0175	25.7869	24.8422	27.3208	21.9842	26.3761	32.7277	29.7918	31.89	26.4531	29.0665	23.6309	29.4857	21.8251
HOXB7_1	HOXB7	Homeobox	protein_coding	8.63661	11.6808	1.95579	2.89494	18.8581	17.8475	6.29873	3.3023	1.96282	2.28862	15.9848	16.453	18.5817	16.2522	16.4182	17.2042	17.328	16.3665	20.4237	14.5687	13.9395	17.7956	12.9727	14.4601	12.5613
HOXB8_1	HOXB8	Homeobox	protein_coding	5.23215	6.40276	1.60906	2.11278	7.42815	7.4493	2.80165	1.604	0.89018	1.35935	4.83059	2.95707	1.89693	1.65415	3.31531	2.97995	2.56197	3.55198	4.08612	3.51068	3.0487	3.2904	1.49597	2.86297	2.64789
HOXB9_1	HOXB9	Homeobox	protein_coding	76.5744	64.0602	7.82951	5.68587	56.0585	37.8914	7.12607	5.39869	2.49211	1.57864	14.7185	13.1435	15.6331	9.8561	12.5086	12.5537	10.6159	9.30629	17.3399	9.92482	11.9359	12.1869	7.82346	10.7992	9.15125
HOXC10_1	HOXC10	Homeobox	protein_coding	200.535	224.349	1.1208	1.00548	287.013	332.107	0.575941	0.493765	9.04297	7.39996	61.9448	64.0005	51.7632	54.7244	59.7815	58.6854	54.1624	63.8357	61.3216	60.3435	53.7326	55.8727	47.843	58.5337	44.7292
HOXC11_1	HOXC11	Homeobox	protein_coding	16.5371	18.4404	0.098684	0	35.0519	57.4406	0	0	0.651961	0.414499	2.3696	1.21605	1.9607	2.69705	1.42149	1.56083	1.34042	2.20247	2.48184	3.09984	1.74071	2.80143	1.36629	2.51714	1.85963
HOXC9_1	HOXC9	Homeobox	protein_coding	31.7268	38.9775	41.4837	62.0354	48.2375	57.8028	33.0275	45.7904	4.18117	5.62738	8.61153	9.07185	6.86526	5.85116	6.50993	5.64429	6.82765	7.17177	7.59818	9.54923	7.18304	11.4523	6.55235	6.34962	7.67881
HOXD10_1	HOXD10	Homeobox	protein_coding	26.5104	26.2988	0.844347	1.09137	17.0414	15.5118	0.625537	1.18707	1.41581	1.26753	4.00436	2.4727	3.13899	8.10556	6.07004	4.5018	6.21651	7.61584	3.26656	7.19013	3.73168	6.48485	4.09802	2.86239	4.41962
HOXD11_1	HOXD11	Homeobox	protein_coding	3.89966	2.35535	0	0	0.4784	0.63724	0.059059	0	0	0	0	0	0	0.239944	0	0.111749	0.111936	0	0	0.170854	0	0.347843	0.133545	0	0.283144
HOXD3_1	HOXD3	Homeobox	protein_coding	7.61746	6.48858	70.3644	94.0071	5.60102	12.2883	41.842	54.5078	28.2512	38.9934	13.4846	11.9211	11.7304	11.0796	11.4444	13.2926	12.2392	13.2522	15.0454	22.4859	20.9976	20.3761	28.9412	21.5949	22.4165
HOXD4_1	HOXD4	Homeobox	protein_coding	4.41134	3.19814	51.5532	59.9708	2.18117	4.70846	22.2767	23.6555	12.9129	19.2958	3.44869	2.61125	3.57987	3.33129	3.0292	2.15674	4.26333	4.14656	4.83701	7.69919	7.32496	5.53135	7.28023	5.82944	7.7871
HOXD8_1	HOXD8	Homeobox	protein_coding	29.8697	34.7436	15.4824	16.83	25.0575	23.5325	18.6271	20.73	4.60888	4.97238	33.7509	29.5735	34.2211	32.8595	30.7758	34.4071	23.3544	37.4772	24.643	25.0796	18.9909	26.7622	17.7855	22.1081	25.7645
HOXD9_1	HOXD9	Homeobox	protein_coding	13.9132	17.62	4.01333	3.41193	23.4513	27.2029	4.75935	5.91785	2.4986	2.67364	12.0983	8.60883	7.70665	9.86167	10.8021	11.552	9.68138	14.5059	8.67812	10.0196	7.59496	10.319	7.47461	8.38118	7.22002
IRX1_1	IRX1	Homeobox	protein_coding	277.575	313.65	145.813	118.617	215.304	346.665	85.4721	92.2258	11.699	7.23927	50.5603	49.1571	50.6773	51.7451	44.6119	55.1651	41.674	44.2146	39.9432	37.2408	28.5691	41.2615	27.4651	35.3165	30.6949
IRX2_1	IRX2	Homeobox	protein_coding	68.3628	83.7415	255.972	279.346	80.7042	145.914	146.596	234.982	24.3135	21.6615	90.7183	98.1338	91.3959	74.9473	86.6604	90.6819	84.4246	87.6825	84.9709	84.7532	76.6092	84.0067	80.4491	81.7236	72.833
IRX3_1	IRX3	Homeobox	protein_coding	130.184	157.481	90.5568	105.074	51.7954	78.1343	65.0497	72.1329	11.4401	6.35183	37.0706	39.1682	37.3113	28.8105	35.7413	39.8795	30.8561	29.3361	29.9071	28.9941	25.2846	27.1522	23.5616	23.2851	26.2189
IRX4_1	IRX4	Homeobox	protein_coding	19.2989	7.91492	561.744	569.302	2.13935	2.18989	269.394	277.492	4.90881	3.0951	55.0935	64.7628	57.6755	39.0427	47.1846	64.531	38.411	46.8757	39.0067	24.2281	20.303	29.9536	19.5885	28.1971	19.654
IRX6_1	IRX6	Homeobox	protein_coding	149.792	178.06	3.82351	4.67818	39.2405	55.0537	0.759079	0.546125	1.19454	0.747075	20.5056	16.9305	13.0569	15.4622	17.9645	18.23	12.3737	15.227	11.4306	10.6227	8.3316	12.5541	6.96845	9.14248	9.09004
LBX2_1	LBX2	Homeobox	protein_coding	2.86113	1.93146	0	0	1.53368	2.6736	0	0	7.07312	6.04485	1.43398	1.78574	4.95704	3.61335	3.35314	2.22357	5.77896	6.18335	5.97149	15.2532	12.6861	10.8986	13.6063	9.72309	14.4486
LHX6_1	LHX6	Homeobox	protein_coding	3.35087	4.18228	0.055077	0.083342	5.29867	4.7399	0.055894	0.225948	0.59877	0.608619	25.1792	20.4934	19.4647	24.4582	25.2959	31.53	17.95	20.4457	21.2234	13.9191	18.0713	18.0793	11.944	13.6472	14.3979
LHX8_1	LHX8	Homeobox	protein_coding	0	0	0.082066	0.118403	1.27779	0.045324	2.0397	2.47813	0.362629	0.293043	5.51693	7.06844	5.71076	4.608	4.00198	6.42741	6.56412	7.59251	6.42129	5.44647	4.13465	4.24453	4.88847	5.51821	3.44107
LHX9_1	LHX9	Homeobox	protein_coding	0	0	0	0	0	0.057635	0	0	0.363012	0.208225	3.69089	3.29505	2.74356	1.3725	3.44566	3.63825	1.50505	2.48043	2.30043	3.67788	1.46265	2.05434	2.11801	1.07275	0.946848
LMX1A_1	LMX1A	Homeobox	protein_coding	0.120108	0	0.163989	0.183485	0.489226	0.038407	0.043945	0	0.013776	0	4.38713	5.49673	3.12075	1.08282	4.52975	6.22682	6.35512	5.49732	3.33354	1.20299	1.85943	2.19482	1.78888	2.55568	1.07235
LMX1B_1	LMX1B	Homeobox	protein_coding	7.38544	1.61766	235.453	219.661	2.1526	4.65129	154.177	225.467	56.388	70.4511	11.1203	11.736	9.65156	15.7666	13.9096	13.0552	24.644	22.8008	26.8839	42.4558	48.511	36.1943	57.2784	49.3252	45.6903
MEIS1_1	MEIS1	Homeobox	protein_coding	302.87	253.708	200.116	200.079	289.11	453.532	114.374	215.51	22.1061	16.718	35.3531	32.7739	36.9453	36.497	38.881	37.1044	39.7503	39.4125	34.5812	36.4008	27.2841	33.9392	23.5982	33.44	33.5376
MEIS2_1	MEIS2	Homeobox	protein_coding	97.8773	99.1955	89.7993	107.414	106.987	153.215	82.2662	86.6566	13.2694	11.1246	49.8189	48.9805	54.0773	49.3928	48.2582	46.2805	55.2341	55.4812	54.2237	49.6452	43.1543	49.3076	37.8328	46.7842	45.995
MEOX1_1	MEOX1	Homeobox	protein_coding	1.56743	1.38437	0.853505	1.20618	4.18952	2.53484	0.647838	0.670072	0.150069	0.178302	0.8305	0.908053	0.802375	0.581351	0.84677	0.926703	0.605582	0.410121	0.378514	0.61268	0.441371	1.01445	0.220819	0.621489	0.433343
MEOX2_1	MEOX2	Homeobox	protein_coding	9.14817	12.0678	0.030216	0.069065	37.1263	31.0072	0.058327	0	4.69543	2.79375	96.2606	95.3725	95.6848	90.108	108.822	91.1986	97.8695	86.8254	79.3326	67.6241	57.8525	71.2723	49.2193	50.8703	59.9825
MKX_1	MKX	Homeobox	protein_coding	0.162852	0.038403	0.016603	0.018752	0.076077	0.142811	0.746519	0.882641	0.764233	0.553641	3.15154	3.07101	2.84019	2.5006	4.09356	3.26668	5.10796	3.72706	5.4101	5.35945	4.916	4.75321	4.04304	5.09145	5.22356
MSX1_1	MSX1	Homeobox	protein_coding	2.82817	0.959237	36.157	11.8612	0.870808	1.04233	27.8936	32.9337	9.64226	9.57044	3.56745	3.7914	3.98109	4.67828	2.66743	4.81476	3.51516	3.13125	3.45701	11.0978	8.77105	15.1409	7.49844	7.4794	13.575
MSX2_1	MSX2	Homeobox	protein_coding	0.436737	0.158511	15.6512	18.5073	0.621907	1.34289	57.6698	94.9786	390.647	428.353	24.3369	25.023	24.6746	33.9542	29.2194	30.3183	49.2433	44.8867	56.3058	139.614	202.83	142.562	224.359	179.463	207.577
NKX6-1_1	NKX6-1	Homeobox	protein_coding	79.8829	58.6531	0.618971	0.674242	9.17296	7.51392	0.247593	0.94562	3.38875	3.62622	8.40174	8.51761	5.4621	8.45426	13.7262	10.9888	5.61103	12.8233	7.97122	12.9317	11.6338	10.4823	13.4035	7.73894	9.65289
NOTO_1	NOTO	Homeobox	protein_coding	0.187429	0.176262	5.74221	7.24397	0	0	0.823924	0.964145	0	0.01496	0	0.052067	0	0.081833	0.058772	0	0	0.057869	0	0	0.092471	0	0.054545	0	0
PAX3_1	PAX3	Homeobox	protein_coding	7.86722	3.81014	20.0925	6.22582	1.23455	1.67922	5.74537	5.96315	0.241136	0.195232	0.645108	0.152866	0.671759	0.219881	0.580423	0.374527	0.834094	0.660861	1.11812	2.09713	1.65782	2.02695	0.111269	0.70874	0.524291
PBX1_1	PBX1	Homeobox	protein_coding	87.7727	89.3334	107.675	116.256	129.56	153.373	76.5227	99.7284	28.3823	24.0881	68.7827	64.3522	62.2934	59.6114	61.8577	67.2128	74.8425	72.6093	63.0311	77.269	62.756	55.5252	55.594	59.9485	62.0317
PBX3_1	PBX3	Homeobox	protein_coding	32.9697	28.0957	14.9361	16.5174	27.8865	38.7771	25.6099	36.3509	7.05053	6.20325	24.924	26.5708	25.0422	21.3856	25.026	25.879	22.978	21.2691	24.3912	26.7914	23.7376	22.4812	21.3711	23.6693	19.758
PBX4_1	PBX4	Homeobox	protein_coding	22.5329	23.1963	29.0733	32.7567	24.7125	32.7185	26.406	28.1771	5.58262	4.50996	9.37773	9.56866	8.34891	8.52456	9.23751	10.1554	9.42653	8.95464	9.36279	11.6161	11.7615	13.481	9.31048	11.5951	8.21867
PITX1_1	PITX1	Homeobox	protein_coding	12.3959	11.0754	0	0	8.4724	6.062	0.081118	0	0.219237	0.684324	2.81096	1.72893	3.10842	1.49512	5.67398	5.23608	4.25048	3.39934	1.82914	1.54076	2.40758	2.27725	1.79617	3.00606	1.53213
PITX2_1	PITX2	Homeobox	protein_coding	41.0805	37.3694	0.13685	0.34159	16.7317	18.0955	1.5651	3.39878	1.19041	0.871176	14.4765	17.453	19.6595	5.82942	10.8036	11.0507	8.29102	13.1375	16.8971	3.79049	12.5179	4.62023	9.30672	10.2018	4.62587
PKNOX1_1	PKNOX1	Homeobox	protein_coding	28.4984	24.2965	20.629	20.4638	25.5951	24.9962	29.8401	22.9863	5.62758	4.59303	20.2551	19.5697	21.1885	18.4976	22.7637	18.0637	21.6554	21.3493	22.2111	20.4701	19.6098	17.5505	19.8184	21.3831	16.8533
PKNOX2_1	PKNOX2	Homeobox	protein_coding	10.0942	10.0163	17.2182	18.8535	10.0565	16.0109	15.6081	21.1975	3.02532	3.72841	12.4014	13.3602	13.2729	10.9492	12.0173	13.5562	13.2241	11.2776	13.3234	11.2196	9.4664	11.051	11.0545	10.9521	9.33659
PRRX1_1	PRRX1	Homeobox	protein_coding	439.028	411.832	1.35502	0.545592	729.626	900.013	0.323393	0.284279	27.6591	26.244	227.694	236.988	188.906	222.044	226.494	248.978	191.294	187.009	188.028	169.386	153.168	163.6	115.13	146.402	151.132
PRRX2_1	PRRX2	Homeobox	protein_coding	122.057	158.294	0.386934	0.308194	197.639	236.712	0.371804	0.059672	13.6136	12.1678	97.7165	106.573	96.9082	90.0664	79.3056	116.874	65.409	75.1997	72.1557	75.3834	50.1909	73.218	54.3326	65.8583	62.1053
SHOX_1	SHOX	Homeobox	protein_coding	16.6561	12.6408	0	0	5.75112	5.98449	0	0	0.450779	0.197537	0.410996	0.582055	0.716355	0.624436	0.92331	0.666693	0.193411	0.81542	0.444646	0.270957	0.150384	0.369269	0	0.216523	0.07157
SIX1_1	SIX1	Homeobox	protein_coding	1.2567	0.473422	35.9683	40.083	0.482595	0.514727	16.8601	15.5694	0.868288	0.436383	2.77185	3.32504	3.41739	3.44343	4.031	5.47517	3.80679	4.69923	5.50544	6.39321	6.35663	7.54679	6.2674	6.17092	5.36346
SIX2_1	SIX2	Homeobox	protein_coding	13.3357	14.7892	0.374881	0.933568	17.1477	12.8532	0.617041	0.543562	0.497514	0.517039	1.36897	2.00926	2.58431	0.726579	2.64518	2.58828	1.29621	1.37494	1.4869	1.46464	0.684731	1.90016	0.69385	0.813839	0.875134
TGIF1_1	TGIF1	Homeobox	protein_coding	56.2767	60.9531	94.1084	129.486	64.3007	66.0418	89.4529	109.745	20.7555	19.0211	33.298	27.995	29.3782	34.298	30.3589	31.5133	42.7211	44.6488	45.0181	50.6217	50.2782	47.4468	36.0702	52.1021	44.4657
TGIF2_1	TGIF2	Homeobox	protein_coding	14.8006	56.2693	92.7621	93.0803	58.5048	66.2297	61.1511	62.4296	3.28586	11.4911	18.4584	20.2966	19.6714	19.849	19.951	22.8694	7.60833	18.8199	21.6614	27.0656	24.6137	24.8762	25.4278	25.0258	6.81398
VSX1_1	VSX1	Homeobox	protein_coding	2.60562	4.31584	0.149817	0.045759	2.94481	5.32456	0	0	0.16972	0.132487	3.8013	4.99423	2.90016	2.97713	3.98085	5.46992	2.03474	3.00716	4.25898	2.70644	2.30015	2.94057	2.60454	2.33405	1.23299
ZFHX3_1	ZFHX3	Homeobox	protein_coding	94.9966	73.7721	53.9653	48.0875	28.8267	29.0507	33.4178	38.2378	3.02996	2.85101	11.1342	10.2622	10.7235	8.76567	10.8311	10.9195	10.3871	10.0523	10.6168	10.5522	10.2998	8.66331	7.78277	9.26214	9.52053
ZFHX4_1	ZFHX4	Homeobox	protein_coding	114.149	89.4268	19.4724	22.9856	44.2652	52.6203	8.6893	17.1883	0.93349	0.607639	7.36373	6.44958	6.62906	6.06916	6.85498	5.95328	7.47244	7.18826	6.18696	6.46354	4.92411	4.89906	3.21852	4.08941	4.28454
ZHX2_1	ZHX2	Homeobox	protein_coding	11.0829	11.8716	16.4558	21.2906	28.1655	39.8164	20.3316	23.245	9.93566	11.6525	25.0427	21.4856	20.9327	22.5563	23.738	26.5575	24.0482	23.0794	23.0529	23.5627	25.9828	23.6902	20.3654	23.3734	21.8485
ZHX3_1	ZHX3	Homeobox	protein_coding	11.1457	8.77465	7.95711	7.82848	8.71808	13.3544	7.94886	10.7714	13.5757	11.886	18.0481	6.61516	9.63799	8.96698	11.011	19.2774	11.0623	11.8725	22.9128	20.9457	10.5992	9.08985	16.5938	9.87329	18.4726
PROX1_1	PROX1	HPD	protein_coding	5.96432	4.39264	5.68831	4.70485	4.59095	8.14724	3.53424	5.36452	0.412627	0.420244	2.78733	2.49071	2.66543	2.10855	2.3527	1.67935	2.60238	2.80091	2.87281	1.33575	1.35713	1.67296	1.5268	2.13793	1.72818
HSF2_1	HSF2	HSF	protein_coding	54.5078	60.9824	56.2856	59.4079	85.3427	104.173	66.7413	65.5275	16.1348	14.7115	56.4431	64.7002	57.3327	59.5757	56.4069	53.4779	60.0665	56.9869	57.8228	52.6615	54.0323	46.6507	54.864	60.9142	49.3022
HSF3_1	HSF3	HSF	protein_coding	13.2822	14.18	20.2484	22.334	24.4592	35.935	28.0672	27.1361	8.05726	7.53073	60.8742	53.9631	59.1526	52.6147	54.1924	59.2604	59.0074	56.4938	57.4426	50.3439	45.4324	55.829	38.6225	50.9271	42.5447
HSF5_1	HSF5	HSF	protein_coding	2.34288	2.63402	1.28889	1.31874	0.374268	0.476208	0.503275	0.591541	0.112883	0.074123	7.71529	15.658	9.77467	11.0459	12.7368	20.3368	10.0246	14.6855	12.2982	4.13873	3.68157	7.2456	4.88664	10.2173	6.40164
LCORL_1	LCORL	HTH	protein_coding	15.5229	13.2405	10.6502	12.2616	11.7911	17.0105	12.3152	20.5857	1.91573	1.50832	11.8609	12.6135	12.5195	11.6489	12.235	10.7521	14.547	11.9939	11.878	11.2328	10.1087	10.7322	8.95116	12.4988	8.25456
IRF1_1	IRF1	IRF	protein_coding	2.83117	2.18904	3.62889	1.99183	2.36401	3.97351	4.93345	7.35005	1.12801	0.960092	12.0246	14.2035	12.0262	12.3769	14.7501	12.8081	10.7355	13.2952	13.8691	14.7514	35.3259	11.7998	14.3951	13.8913	12.2683
IRF2_1	IRF2	IRF	protein_coding	25.8291	25.3696	24.5717	27.5841	29.8111	27.0784	18.1961	17.7484	12.8886	9.04216	50.2872	49.7277	51.9517	47.4676	48.3157	40.6669	49.2653	46.949	48.9618	42.916	38.97	43.6849	32.2658	39.4133	39.7539
IRF4_1	IRF4	IRF	protein_coding	0.096846	0.151203	0.235282	0.141623	2.73025	4.85108	0.119228	0.038512	0.051214	0.012604	0.161061	0.131346	0.163464	0.177101	0.460561	0.149511	0.20392	0.096261	0.13823	0.76931	1.78818	0.260628	0.410034	0.345322	0.526375
IRF5_1	IRF5	IRF	protein_coding	3.05915	1.48933	0.542826	0.434723	1.73696	1.79097	0.901429	2.0932	0.532325	0.303183	4.63349	5.2558	4.46571	4.11427	6.65257	3.70584	3.88138	3.76478	4.58882	4.05419	5.10959	2.48577	1.77422	3.47446	2.3033
IRF6_1	IRF6	IRF	protein_coding	3.6622	0.881524	108.818	118.168	1.05638	0.980344	179.499	169.239	85.5718	88.6181	108.933	120.892	115.937	109.275	102.667	129.733	121.322	132.163	140.305	174.967	190.167	166.235	200.809	187.683	179.946
IRF7_1	IRF7	IRF	protein_coding	3.09123	2.83009	2.9903	5.31921	2.84517	5.562	5.5271	6.58492	0.737058	1.04074	8.04628	6.74586	6.76291	7.1802	10.0602	9.191	5.36541	7.30167	5.22478	7.81486	15.5684	7.40225	7.47109	5.78609	7.83285
IRF8_1	IRF8	IRF	protein_coding	22.3796	21.0885	13.8245	15.215	22.6144	17.7403	24.4868	18.2777	4.36688	3.80692	62.9623	57.9057	54.5588	55.4349	55.3847	54.5903	44.9527	48.1413	50.7173	44.4733	64.5914	46.2517	35.5123	52.3296	40.5322
IRF9_1	IRF9	IRF	protein_coding	1.90917	0.528412	0.783577	0.974866	0.994049	1.13842	0.414548	0.229018	0.399602	0.056525	5.21029	7.50683	4.31467	7.29744	5.70101	7.1521	4.28908	4.99111	4.25841	3.73993	6.49287	3.45972	4.48515	5.81546	4.45932
LRRFIP2_1	LRRFIP2	LRRFIP	protein_coding	43.0539	40.0808	44.2438	49.6721	34.475	37.3597	53.3548	62.3484	19.8116	17.6584	77.4605	81.1226	77.9302	89.1853	83.5246	81.8469	89.5636	81.9708	77.8009	70.5773	60.0599	67.6045	68.7587	82.9235	60.7653
BAZ2A_1	BAZ2A	MBD	protein_coding	17.7742	17.8608	35.5641	39.4148	19.1312	31.8428	35.5077	57.6869	23.3768	26.3593	21.6207	21.854	22.6422	21.4818	22.4517	29.0017	22.5566	19.8337	26.3732	28.467	25.8022	25.4742	29.345	26.6376	26.7845
BAZ2B_1	BAZ2B	MBD	protein_coding	36.3014	36.997	42.9946	50.224	36.5606	76.5995	35.599	76.8881	21.3081	23.0222	24.9932	23.4528	24.7878	24.0332	24.662	26.9087	30.1089	27.3089	31.0555	30.0171	27.1408	26.0055	31.2773	34.2973	25.2233
MBD3_1	MBD3	MBD	protein_coding	153.914	140.735	76.7441	74.1488	158.535	137.749	90.4903	63.4552	14.6164	13.904	30.211	31.9271	31.2261	29.5092	30.944	31.1784	31.6243	30.9402	34.2877	37.6198	43.0076	37.6883	40.8349	37.9494	33.6005
SETDB1_1	SETDB1	MBD	protein_coding	34.93	34.1908	47.2488	50.9601	31.788	43.6901	42.5539	44.3489	13.3279	13.9579	26.4996	24.8915	27.1088	24.2836	26.425	26.5292	25.7234	25.1999	26.0392	28.2814	26.1726	26.5685	23.2921	22.7208	24.6253
SETDB2_1	SETDB2	MBD	protein_coding	18.339	20.5014	23.9822	24.3326	22.8522	23.0881	28.9445	29.2254	5.75155	5.61298	13.226	15.6295	12.756	13.0543	14.8381	14.0624	14.78	17.5687	16.4724	16.0251	19.2906	17.2459	18.3227	18.4427	16.1863
SMAD1_1	SMAD1	MH1	protein_coding	107.947	124.82	122.756	120.505	88.79	94.2445	96.1071	120.083	34.5651	28.5402	64.4738	70.0971	58.6119	47.0127	55.9642	55.7562	77.5243	54.6937	67.059	59.3881	58.6585	58.8643	49.6119	56.0406	58.0805
SMAD3_1	SMAD3	MH1	protein_coding	242.705	322.246	75.8829	95.8746	182.286	205.585	88.3828	92.439	23.6593	23.341	56.1707	53.5312	50.1325	57.3072	63.5607	52.363	57.7506	59.1678	50.66	53.675	47.0328	45.8979	34.817	42.6457	48.698
SMAD5_1	SMAD5	MH1	protein_coding	173.284	179.727	157.846	164.852	224.309	211.113	166.567	147.162	62.2583	75.2031	109.232	112.186	117.056	105.986	115.02	112.385	127.754	115.092	119.242	107.972	108.934	96.6645	104.715	115.712	102.113
SMAD6_1	SMAD6	MH1	protein_coding	34.1785	36.6656	13.6415	18.5454	48.9035	67.5782	38.8042	53.8258	101.602	101.844	36.2454	38.4411	31.8586	39.4348	36.5909	38.4434	37.3637	32.3043	37.4675	52.6038	56.9259	54.6414	64.7648	55.9778	61.8429
SMAD9_1	SMAD9	MH1	protein_coding	6.59478	11.775	0.476131	1.15702	10.7003	20.94	11.557	14.3648	18.7955	21.5718	13.2195	14.3956	14.115	13.7386	13.4855	14.7311	15.4369	14.1538	14.1999	14.9769	12.5507	12.1975	16.3641	18.9719	14.7872
NR0B1_1	NR0B1	Miscellaneous	protein_coding	0.994658	1.37842	0.725621	0.343242	1.2845	1.39676	1.38518	1.6496	1.29378	1.27549	0.905834	0.4449	1.68298	0.760125	0.975556	2.97486	1.04803	0.712969	2.40474	2.03325	1.89313	1.98035	2.06407	2.47528	3.80046
RXRA_1	RXRA	Miscellaneous	protein_coding	37.1962	36.5911	45.5385	48.1345	45.728	101.581	47.9587	103.22	22.4036	23.1155	24.4753	25.6788	26.6332	20.5686	17.2409	28.0574	24.9897	28.9652	20.6254	21.7841	31.914	18.592	32.7944	29.8602	28.6037
CDC5L_1	CDC5L	MYB	protein_coding	128.62	129.134	116.691	121.399	143.402	144.133	128.609	121.05	41.6632	39.5522	74.6073	85.2302	77.4785	78.0641	80.8391	84.6364	80.0187	83.124	83.4224	88.3996	88.36	89.2364	79.8903	85.6588	87.8095
DMTF1_1	DMTF1	MYB	protein_coding	15.8504	15.9793	19.5895	22.005	18.1956	28.6783	16.4652	21.7698	7.58138	6.72172	19.5543	18.7483	20.0786	19.6065	21.098	20.9999	21.4121	20.327	20.8735	21.1476	19.679	19.9725	20.5355	22.5022	16.8612
DNAJC1_1	DNAJC1	MYB	protein_coding	33.373	28.8821	26.3441	24.7545	43.1251	55.7987	31.3362	36.0261	12.7198	10.1746	57.2005	52.1213	55.7216	49.8791	58.4359	51.3939	55.9248	50.9247	57.2862	42.9844	43.0441	49.1959	38.9064	41.125	45.1285
DNAJC2_1	DNAJC2	MYB	protein_coding	100.054	96.5001	108.314	113.736	84.6244	71.0645	108.806	101.734	33.8658	32.572	50.0747	53.6303	53.1764	51.4277	47.9417	50.8811	55.6988	57.7984	52.9115	56.4638	57.5626	58.4522	67.0382	65.7868	47.8011
MIER1_1	MIER1	MYB	protein_coding	37.4399	39.6094	31.0709	35.5547	40.2522	48.7578	36.5645	44.4395	12.635	11.5069	29.7934	38.0345	35.3771	31.0179	34.2624	31.633	33.7916	34.6885	36.3407	38.1046	35.1488	32.8318	30.4017	35.8794	30.4909
MYB_1	MYB	MYB	protein_coding	8.56677	8.76381	11.3209	12.2308	6.16872	5.9819	38.5257	43.4464	7.67361	11.6629	6.58999	6.25558	5.95615	7.32395	6.43821	4.72529	8.12327	8.81623	10.2863	10.9225	11.2477	8.50326	10.2517	12.6631	9.15347
MYBL1_1	MYBL1	MYB	protein_coding	5.09797	5.56243	3.09359	4.11901	2.70958	3.31342	6.75724	11.3241	0.67302	0.498104	9.86458	11.6005	10.2557	11.094	11.4669	9.00104	10.7893	11.9051	12.7034	12.1119	10.1596	7.36102	9.35335	10.7975	8.25466
MYBL2_1	MYBL2	MYB	protein_coding	78.2732	84.3895	59.9659	65.9074	80.5024	84.5519	83.5487	78.798	11.5934	10.6822	44.8744	45.693	44.9469	46.5062	43.9439	36.4332	43.6499	43.5909	45.6127	46.8203	46.1888	45.3481	40.6602	42.4157	37.5346
MYSM1_1	MYSM1	MYB	protein_coding	15.1876	15.8968	13.3542	15.4807	18.8849	25.1846	17.0866	21.2568	7.3283	5.29378	23.609	25.7293	25.7353	21.8249	25.5705	24.6884	25.1307	26.2518	24.8614	25.1104	21.6015	22.5372	24.6791	27.4452	20.5441
NCOR1_1	NCOR1	MYB	protein_coding	54.5846	54.6442	67.4491	70.1987	65.5185	88.3269	58.8434	79.8416	19.202	21.6142	24.5637	25.6797	26.5665	22.2748	25.7659	25.1178	27.3375	27.2669	27.4171	29.8938	29.1721	26.9697	25.9975	29.0676	27.0424
NCOR2_1	NCOR2	MYB	protein_coding	56.8839	46.7097	79.6133	90.9158	67.6435	100.943	68.4416	95.8257	34.9915	41.2864	46.5083	51.1751	44.284	56.2918	54.0349	60.1215	50.4894	39.7006	46.5568	44.5333	42.3821	39.4815	42.1086	49.454	45.3695
RCOR1_1	RCOR1	MYB	protein_coding	65.8974	66.723	64.3842	67.1507	90.344	90.2583	75.8075	69.2267	26.4266	26.1547	41.6829	46.4583	45.6795	41.0955	50.3288	46.2633	56.5537	54.7408	58.227	63.4145	63.0222	52.378	62.7875	60.5626	54.038
RCOR3_1	RCOR3	MYB	protein_coding	53.421	54.0255	38.0003	43.2225	51.8155	49.1339	42.5426	32.5569	8.61407	8.59326	28.6336	21.1085	22.3711	33.0846	26.0691	26.42	23.8607	28.2784	22.519	29.2791	28.2895	25.4566	35.7555	27.5177	26.5053
SMARCA1_1	SMARCA1	MYB	protein_coding	50.0634	50.1029	35.2969	39.8838	77.1788	75.3101	41.1789	39.0577	8.34038	8.15797	43.0518	39.0811	49.8127	45.8919	44.7206	44.0911	46.5329	42.8767	40.7059	48.8577	43.6428	49.0598	32.8005	38.5278	38.7684
SMARCA5_1	SMARCA5	MYB	protein_coding	95.5861	115.959	145.867	157.342	90.2668	77.1059	166.798	141.844	50.1707	42.9483	57.8484	97.7174	73.9427	80.5181	81.1768	84.2713	86.3703	81.5003	81.2131	99.2247	109.128	95.8085	122.607	116.301	93.291
SMARCC1_1	SMARCC1	MYB	protein_coding	190.49	203.372	342.14	372.495	176.033	203.041	296.513	333.94	54.6932	59.4143	48.5277	50.8095	47.0582	48.9427	51.03	50.024	59.4923	50.5785	57.3403	81.6191	82.849	69.102	66.4937	68.0315	71.2427
SMARCC2_1	SMARCC2	MYB	protein_coding	68.1032	71.5609	70.6963	79.2327	79.9833	121.5	65.1192	87.7887	27.1671	29.9326	32.8738	29.1591	33.9484	28.1348	29.9904	34.68	32.067	30.0298	28.5199	36.4963	30.8684	34.7418	25.7666	28.2214	29.0974
SNAPC4_1	SNAPC4	MYB	protein_coding	13.108	10.983	14.1932	14.7287	11.2539	23.3669	13.3987	24.8268	4.15888	4.58243	8.26411	7.56238	7.04961	7.57293	8.50298	8.7951	7.12639	7.06158	6.24905	8.72055	9.02493	7.89664	9.48712	9.1233	7.20457
TADA2A_1	TADA2A	MYB	protein_coding	20.5654	27.0918	21.8169	29.6715	25.813	33.1063	26.5979	32.548	6.0991	5.20418	14.7296	14.6131	14.2257	15.3293	13.8688	12.9059	15.0443	15.6837	19.7751	15.9143	14.7118	18.4958	15.4268	17.6945	18.635
TERF1_1	TERF1	MYB	protein_coding	32.3773	30.1258	20.3749	20.0293	21.4299	18.6502	32.2529	25.1893	2.75172	2.01581	16.7701	20.7452	20.5117	19.6066	20.2741	12.1623	20.7615	22.5343	20.7148	24.2309	20.145	17.3499	18.8563	18.0414	15.6924
TERF2_1	TERF2	MYB	protein_coding	38.5501	38.0082	38.7618	41.9182	37.5385	42.6567	44.3336	55.4893	10.2757	10.8871	33.628	36.8419	37.6535	34.9253	35.4787	33.3915	37.0595	34.1702	35.9499	40.1847	34.9373	35.966	36.2613	37.7998	30.8553
GLMP_1	GLMP	NCU-G1	protein_coding	20.781	19.4039	21.9376	24.3452	16.2001	28.0171	23.1387	28.9622	16.6601	14.6892	39.0219	31.4199	33.0064	33.7405	39.3904	39.1214	34.8185	33.9088	34.1982	41.8558	35.1302	36.8661	29.6919	28.8796	31.0135
NFYA_1	NFYA	NF-YA	protein_coding	61.9258	55.3495	36.1678	37.6205	43.445	41.8059	47.4272	40.6112	13.2784	9.49785	44.1178	48.1682	42.4052	44.0501	51.1856	42.9132	47.4968	49.0002	51.483	50.6676	43.1966	43.0769	51.3996	54.8898	36.2109
NFYB_1	NFYB	NF-YB	protein_coding	42.7025	48.8379	58.0033	68.4603	66.552	74.7438	64.3483	78.5743	11.9275	13.2664	66.2772	60.7259	53.1268	52.9804	54.8807	54.8383	54.8918	67.1266	64.1438	56.5031	43.4859	48.1281	55.1943	70.5475	44.8309
NFYC_1	NFYC	NF-YC	protein_coding	74.93	76.4301	105.778	101.449	88.318	68.6293	79.3872	79.81	27.0524	30.4179	82.7528	71.3004	86.4699	92.5191	93.037	93.7998	89.5675	82.5206	69.6445	82.5208	75.1451	94.9306	68.9863	81.5943	87.9365
NR4A1_1	NR4A1	NGFIB-like	protein_coding	0.111184	0.202016	0.069825	0.022285	0.616111	3.9805	0.714274	10.184	1.20893	1.32209	10.1385	18.9312	12.9616	8.97858	13.5862	11.0266	11.886	2.88463	10.3442	3.26027	2.64199	3.83253	3.37065	13.3534	4.61264
NR4A2_1	NR4A2	NGFIB-like	protein_coding	1.91643	1.50002	0.380605	1.34672	1.26379	7.52734	1.1209	17.3427	0.449485	0.648288	8.92732	8.16713	8.66215	6.24111	6.02068	8.42442	6.09548	5.60003	7.50402	3.89147	3.39286	4.16069	3.28861	7.04462	3.7015
NR4A3_1	NR4A3	NGFIB-like	protein_coding	0.930316	0.839594	1.51652	4.96803	1.65794	9.18255	11.7854	31.1659	2.10388	1.95174	7.15408	9.33179	7.90767	5.2905	13.3703	5.87064	7.56862	2.17287	13.5731	4.41324	3.64823	4.0881	3.62806	7.32	3.46779
NRF1_1	NRF1	Nrf1	protein_coding	31.4277	31.1693	24.5634	24.717	29.752	32.3832	29.5519	40.509	6.68608	7.07362	11.3541	9.56429	11.295	12.041	11.0852	11.6887	11.935	10.8483	11.0606	14.1069	14.1926	12.2161	11.5364	10.4564	10.4956
ADNP2_1	ADNP2	Others	protein_coding	27.2333	26.1019	33.5723	34.2476	21.9431	21.753	25.9676	28.8115	8.73825	6.99794	25.7172	24.6537	23.7786	23.7205	27.4473	24.9185	26.2113	27.9058	29.5759	28.6219	29.8576	26.2547	24.429	29.2465	22.4621
AHCTF1_1	AHCTF1	Others	protein_coding	33.1599	31.7728	37.8471	40.1641	31.6367	36.1063	40.9549	49.2865	14.0275	12.9591	27.1924	32.266	28.4588	30.5295	32.7643	27.4666	30.587	31.3929	30.0715	29.2265	31.6158	26.2279	31.5658	33.1611	28.5364
BCLAF1_1	BCLAF1	Others	protein_coding	126.325	132.569	138.998	155.869	114.193	125.976	126.419	137.798	22.8371	27.6174	72.0058	72.2241	74.3418	69.5275	73.5497	73.2281	74.5615	73.6165	72.0136	87.7229	85.0487	79.3416	73.8625	76.541	71.829
BLZF1_1	BLZF1	Others	protein_coding	35.1024	32.4324	30.044	31.0462	30.7902	24.1982	33.7634	21.2532	23.261	20.5298	42.8458	51.8102	43.8446	45.5064	45.4526	46.874	48.2876	44.1924	41.9976	42.0258	45.1088	42.2585	53.6943	49.2252	40.8096
CAPN15_1	CAPN15	Others	protein_coding	25.3453	23.7608	22.353	24.6144	18.8196	25.8273	21.044	26.338	9.44511	10.047	17.1272	17.8789	16.5333	18.0039	19.2773	21.3116	17.7575	17.1141	18.306	23.7829	23.2133	22.1952	24.2686	20.3632	22.0561
CARF_1	CARF	Others	protein_coding	4.76856	4.03708	5.4856	8.46521	3.88288	6.78604	4.4929	7.55501	1.46696	1.22406	2.46985	4.37109	2.05047	2.19232	2.7258	2.2643	2.80922	2.11022	2.4145	2.54349	2.16537	2.06987	2.42372	3.06123	3.8599
CASZ1_1	CASZ1	Others	protein_coding	53.6666	71.4403	1.80838	2.68487	18.3482	30.0304	4.74625	18.0802	40.0098	45.235	23.9567	23.0977	22.1512	21.4186	22.316	26.0053	22.4881	24.348	30.472	38.1303	46.3065	33.8832	36.6896	44.0203	30.8647
CEBPZ_1	CEBPZ	Others	protein_coding	42.6296	38.0352	48.0349	49.6905	36.9795	31.3672	56.1168	46.4297	17.8115	16.8665	27.3768	30.1375	24.2437	26.137	25.0618	29.6655	29.5257	23.962	27.7022	31.5149	31.2172	26.449	32.6087	30.5245	28.6557
CENPS_1	CENPS	Others	protein_coding	92.9468	75.9582	74.3341	46.8575	53.9045	33.7188	75.2989	46.1792	10.0276	6.19805	38.1173	43.0421	45.2669	44.1905	39.0808	24.8808	40.0416	43.3299	38.3428	42.1425	32.7577	29.4246	33.8515	31.6227	27.9313
CENPT_1	CENPT	Others	protein_coding	40.1187	38.1045	30.281	32.7415	29.3278	26.2418	44.4792	49.681	5.88179	5.90179	22.6573	26.6109	22.6391	29.1197	22.3997	18.7136	21.4195	25.137	24.2601	30.3824	29.0091	25.3726	22.1297	25.1293	20.7282
CNBP_1	CNBP	Others	protein_coding	462.556	447.691	494.079	499.849	383.626	298.94	619.312	491.517	181.608	150.994	663.739	731.989	707.381	636.483	606.172	666.122	634.402	654.002	614.017	643.426	645.771	682.816	656.538	686.219	594.946
CPEB1_1	CPEB1	Others	protein_coding	4.86925	4.59482	3.20232	4.58854	4.08843	7.65587	5.19	3.76416	2.16528	2.98134	1.97302	1.88493	2.44117	1.98944	2.00908	0.894513	2.01518	3.17333	3.74311	5.26871	5.9583	4.97877	6.32254	5.09685	4.58206
CREBL2_1	CREBL2	Others	protein_coding	14.6039	16.5351	21.1282	24.2009	21.341	25.8159	21.4634	22.9405	18.7871	12.6646	45.6261	34.5601	42.2438	34.1839	33.6003	32.9847	42.3218	46.1015	42.4618	37.4011	38.4626	47.4518	33.0009	38.0613	35.2013
CREBRF_1	CREBRF	Others	protein_coding	5.95166	4.95957	4.36329	5.51155	7.59592	12.4281	6.51549	13.5437	5.76232	5.46129	13.3218	6.8209	9.40545	8.60752	9.19422	8.23904	14.4855	15.0956	12.3526	11.5291	11.1785	11.6449	8.31936	10.9997	10.5491
ELMSAN1_1	ELMSAN1	Others	protein_coding	13.0986	14.8389	14.4061	17.4876	19.2753	28.0674	16.92	25.3889	9.13547	8.40569	23.6356	23.9711	24.5622	22.3172	23.7375	24.1981	27.5876	27.173	24.3992	23.439	19.7733	19.3281	11.5512	26.8994	19.7839
EPAS1_1	EPAS1	Others	protein_coding	65.1438	74.7154	32.7975	36.7426	129.806	96.9343	15.9285	19.125	28.597	39.6125	157.361	176.896	193.146	189.761	188.235	166.743	193.151	164.372	182.52	184.663	153.63	204.338	128.279	173.859	160.182
FUBP3_1	FUBP3	Others	protein_coding	102.3	105.734	106.593	111.228	110.931	112.015	120.306	110.106	34.2643	37.5207	69.4922	63.2079	61.7016	63.547	62.1364	67.125	73.3221	69.3644	66.4738	77.2791	81.1026	75.2457	66.3279	65.87	70.8567
GABPB1_1	GABPB1	Others	protein_coding	44.5411	42.7267	30.3292	31.6439	40.7899	34.6905	44.7287	37.6564	10.7187	8.98126	39.2012	42.2629	41.5421	42.8269	41.1154	38.7966	44.2836	44.1715	44.4491	41.0085	43.7055	39.4154	40.2496	41.6156	34.6924
GPBP1L1_1	GPBP1L1	Others	protein_coding	69.1068	67.4321	86.0745	100.409	73.5095	78.6449	89.5943	89.2216	63.7092	62.1433	100.423	102.762	103.918	90.2963	102.111	106.043	101.68	108.891	110.638	110.87	112.194	103.088	103.905	110.417	96.4083
KIAA1549_1	KIAA1549	Others	protein_coding	57.4672	48.9865	72.3819	84.7263	38.8842	45.2297	57.8786	57.9716	12.6303	10.9527	18.9689	20.7342	20.4679	19.7376	20.9511	22.8625	22.4352	22.4038	26.7554	23.4548	24.6638	19.9793	20.2927	26.0444	20.9688
LYAR_1	LYAR	Others	protein_coding	30.6338	35.2416	39.0322	39.8575	32.8488	23.4662	60.8716	46.6008	12.8579	9.36727	28.367	43.2851	28.7422	32.9572	32.5089	29.1411	39.0722	37.5508	35.2476	45.899	46.7003	39.0124	51.9629	44.426	37.4654
MAF1_1	MAF1	Others	protein_coding	75.629	88.7742	87.4582	93.244	89.7011	139.975	70.162	95.0429	24.1198	25.9106	118.176	119.331	127.863	99.3317	106.47	116.033	102.872	93.1574	95.6065	102.293	99.2915	102.717	69.6916	88.5338	89.264
MLLT10_1	MLLT10	Others	protein_coding	22.9278	21.2602	32.9318	35.8141	23.9796	42.261	28.5134	48.2333	11.7502	12.5734	20.3939	21.7842	18.6885	18.319	20.2306	21.9794	20.1072	22.3793	22.0284	24.6869	24.0698	21.7112	24.6666	26.6326	21.6383
MYEF2_1	MYEF2	Others	protein_coding	76.0555	70.5542	76.0538	78.0746	87.1155	90.2847	90.0513	97.833	17.9369	16.6603	28.4501	28.2758	25.9409	29.5619	29.7094	26.5395	32.6306	33.6683	35.485	42.6259	43.546	35.1425	43.7418	44.6023	34.8869
NFRKB_1	NFRKB	Others	protein_coding	28.3046	29.231	33.6678	35.0595	30.3705	35.9166	32.3555	34.4238	10.0539	9.74848	18.5744	18.6564	17.0615	17.4276	17.5289	18.4273	19.4849	19.2366	18.5909	21.0779	22.011	20.5089	20.0881	20.3518	19.5872
NKRF_1	NKRF	Others	protein_coding	24.3778	23.4561	25.9966	27.4512	22.5422	23.8034	32.0436	33.1301	12.1485	10.3669	17.1368	22.863	19.6268	20.874	19.0199	22.9541	19.0962	18.8853	20.6268	24.2911	25.293	24.349	27.0087	26.2404	20.9866
PHB_1	PHB	Others	protein_coding	169.324	156.43	169.08	140.495	118.275	88.3815	165.624	131.995	64.6706	52.0563	129.191	160.473	143.268	166.335	160.63	136.906	154.745	165.682	155.559	189.875	197.706	193.396	190.523	179.717	183.952
PHTF1_1	PHTF1	Others	protein_coding	18.9825	18.6174	21.0541	22.1143	12.9819	21.7265	11.8773	19.5694	3.02876	2.48606	12.9574	10.5187	10.0824	12.8839	10.3108	10.5544	10.7671	11.366	13.8797	14.6117	13.0308	13.0019	12.3274	14.0764	12.9167
PLEK_1	PLEK	Others	protein_coding	6.1267	5.32973	1.80949	2.15165	4.86389	4.36463	1.36134	2.10774	0.618822	0.902575	21.3248	22.9218	19.3133	13.1388	16.0575	14.9343	15.2651	19.1243	16.0333	12.1919	19.8887	12.3912	12.0326	13.443	10.5487
PREB_1	PREB	Others	protein_coding	31.2625	29.8602	25.59	27.3458	22.0087	31.3695	23.5178	33.6618	13.7475	12.2128	37.8153	38.066	37.3559	36.1376	41.2568	37.2395	33.2171	40.3327	34.501	38.7982	34.0634	39.3357	31.2547	34.1119	36.1207
PURA_1	PURA	Others	protein_coding	16.4295	15.0703	16.7553	13.5294	16.5471	19.0927	16.9349	21.1867	16.1578	17.6009	25.9813	27.9858	27.0106	29.235	24.2006	31.3034	33.3068	28.1719	24.175	28.3061	26.9886	32.5674	22.5134	26.7451	28.8317
PURG_1	PURG	Others	protein_coding	9.87196	16.4845	3.50707	8.3179	14.2297	12.6132	3.10396	8.39632	3.3338	2.66446	12.0465	13.0832	14.7515	6.63363	17.4122	15.9832	8.53701	16.7065	19.4954	19.8808	12.4221	16.2177	17.4598	18.274	12.9756
RAD54L_1	RAD54L	Others	protein_coding	20.9135	20.8903	14.0072	15.596	13.6122	12.9421	22.7325	24.2227	2.54598	2.96949	14.2088	16.3935	13.4676	15.7585	13.0246	10.3013	12.1967	13.1855	14.2455	13.9432	13.3069	11.3863	14.692	13.1394	11.7922
RFXANK_1	RFXANK	Others	protein_coding	19.9629	26.4105	21.8971	28.5025	20.6657	24.9429	24.3395	24.2151	10.4533	10.0406	30.6822	28.1308	31.5156	28.2742	29.872	32.4153	26.0567	29.2036	28.6231	27.2509	30.1336	32.2628	25.0603	31.6663	27.6695
SFPQ_1	SFPQ	Others	protein_coding	180.513	175.607	185.107	210.301	155.81	244.48	157.174	300.568	36.5591	41.2404	128.279	133.817	130.052	136.989	147.473	137.912	149.042	143.078	145.728	163.052	139.747	139.534	164.25	168.612	130.018
SLC2A4RG_1	SLC2A4RG	Others	protein_coding	4.90791	5.90472	5.22026	6.8061	3.16907	6.1052	4.72976	7.37934	3.69168	3.85728	2.21986	3.29804	2.43065	2.9261	3.04599	2.80507	2.47602	2.2626	2.35264	3.30581	2.98569	3.55982	4.00581	2.96892	3.2274
TCF25_1	TCF25	Others	protein_coding	54.0204	52.3185	66.4355	70.7861	46.7024	55.7263	55.3304	67.3824	51.3779	51.7807	49.6601	49.6835	51.4591	48.8961	52.5797	55.6313	47.499	52.5713	50.5158	55.0145	62.3846	51.7566	58.5827	56.7007	54.5145
TET2_1	TET2	Others	protein_coding	27.5959	26.5703	46.6615	52.2755	39.097	69.286	50.2649	81.8052	29.7568	31.1922	24.2934	23.0342	26.1965	20.6305	20.6352	20.8572	29.0691	24.5127	24.9163	27.4261	26.3458	21.5168	27.2804	31.3511	25.4733
TF_1	TF	Others	protein_coding	4.21087	4.76253	2.29919	1.88765	5.39471	4.18899	1.96215	1.40855	2.31339	1.9102	41.7443	28.0952	28.8001	25.6066	26.4236	23.114	28.0432	21.6101	15.1772	31.2512	27.7744	24.8342	16.2032	25.5777	28.8055
TFB1M_1	TFB1M	Others	protein_coding	20.187	19.8255	20.1476	23.3041	20.5337	16.3772	25.3704	22.0113	11.5947	12.3445	23.7467	21.7976	21.0134	21.6822	20.8154	16.6612	19.0851	29.9137	20.7203	25.3445	29.0748	29.361	21.0405	20.7381	20.5573
THYN1_1	THYN1	Others	protein_coding	102.585	84.5817	20.5041	21.1406	59.9761	61.0563	22.1239	20.7705	9.11215	10.4502	175.104	165.811	163.548	165.248	162.443	139.052	162.006	174.49	145.732	133.68	128.225	119.568	112.788	120.052	103.104
TMF1_1	TMF1	Others	protein_coding	36.3862	33.7791	37.2963	35.4339	31.1846	30.7598	35.6095	29.8988	16.9384	13.5836	40.0875	41.9943	41.6085	41.0022	47.1564	46.8069	45.5875	47.2699	42.1652	38.3961	40.8523	39.2511	42.2975	45.7966	39.1866
YEATS4_1	YEATS4	Others	protein_coding	78.4399	69.6882	86.103	82.0068	64.9631	58.3788	83.6107	81.1501	41.9424	34.429	49.0204	52.3341	50.5588	54.0749	49.6964	49.6821	54.7911	55.0748	56.0637	82.8143	90.2625	81.8642	87.0889	80.3019	79.2961
ZGPAT_1	ZGPAT	Others	protein_coding	25.1426	22.8574	27.6889	23.0568	21.8356	21.997	22.4754	19.6044	8.43545	7.93599	14.8052	13.5731	15.5965	14.8485	15.4326	15.5135	15.459	16.3488	16.2705	18.5208	17.4286	17.4916	15.3469	15.6405	16.7051
ZNF318_1	ZNF318	Others	protein_coding	24.8616	24.5231	24.7921	24.9815	26.0564	34.6323	22.6799	26.7196	8.69641	9.64557	20.6672	21.7376	21.3711	17.4947	23.2405	20.9219	23.4851	21.789	21.9537	21.8982	21.0296	20.4631	22.6844	23.1655	20.5946
ZNF326_1	ZNF326	Others	protein_coding	100.963	101.533	111.026	107.717	86.7807	90.3344	105.364	105.774	21.7799	18.905	61.2975	74.3747	69.5812	70.9944	72.4608	64.1231	74.3847	71.6919	77.5011	83.4978	75.3502	67.2669	89.2438	85.0431	65.5383
ZNF395_1	ZNF395	Others	protein_coding	24.4718	25.8185	19.1311	21.8226	27.1184	37.2549	27.5939	42.3124	5.61046	6.45412	14.9963	12.8603	13.907	14.0525	16.0468	14.0551	13.1928	14.6072	13.3216	16.3201	13.9201	14.4746	11.2095	12.7504	12.167
ZNF609_1	ZNF609	Others	protein_coding	71.1544	71.8478	80.65	94.1028	88.551	122.027	79.6467	104.912	32.7836	38.6938	41.341	48.9987	44.5926	45.0595	45.6386	52.5975	42.9745	42.2213	48.2644	54.9741	51.9204	51.9865	52.1662	51.522	52.5181
ZNF704_1	ZNF704	Others	protein_coding	12.7326	9.02385	12.1367	11.2911	8.28405	10.2152	18.6478	16.1262	2.48778	2.2411	29.9731	29.5218	28.3224	26.5351	26.5732	29.1238	28.3986	25.0821	25.3343	24.0219	18.6752	22.4127	17.2732	24.338	22.2471
ZNF706_1	ZNF706	Others	protein_coding	119.827	99.7274	103.386	91.032	114.109	86.3407	159.512	115.48	55.0027	47.3676	357.486	319.615	376.63	347.131	347.798	348.119	305.968	366.63	343.263	286.198	321.886	311.004	269.284	311.684	269.638
ZNF750_1	ZNF750	Others	protein_coding	2.11346	0.508562	62.8263	63.3946	0.295802	0.576035	88.047	151.305	215.986	219.14	62.5582	57.9541	51.6138	51.1499	53.1821	56.4053	58.3588	63.921	60.5539	73.6573	88.8907	71.7294	91.9018	97.651	86.176
ZNFX1_1	ZNFX1	Others	protein_coding	5.73606	4.35436	2.24236	2.56035	4.45335	5.09186	3.06921	3.40639	1.93665	2.13859	11.7102	9.05688	9.27185	9.28046	8.97467	10.7386	11.4943	11.685	9.21732	10.0237	12.5199	8.25366	7.41891	9.55863	8.18025
TP63_1	TP63	P53	protein_coding	10.3612	3.16448	237.611	289.077	4.00841	4.69671	189.357	270.549	48.2482	58.1891	61.3572	60.9938	54.4459	56.6624	51.7699	64.9472	64.55	61.6413	71.9974	76.9903	75.1893	67.7887	70.4243	80.5146	68.3652
TP73_1	TP73	P53	protein_coding	3.56691	1.57132	62.47	73.4628	1.48338	2.6514	75.4543	66.3006	6.06871	6.64441	10.315	11.9495	11.4944	12.6821	12.8691	10.8038	12.2971	21.5807	16.5745	20.4719	20.3255	21.6092	15.1795	17.3264	14.9853
PAX1_1	PAX1	PAX	protein_coding	1.26713	1.8068	0	0	2.54167	2.34312	0	0.31116	0.179271	0.048001	10.048	7.88323	6.7645	4.46296	6.49639	6.89944	6.25973	4.08757	3.72509	1.73578	1.83282	2.268	1.34766	1.92744	1.53231
PAX7_1	PAX7	PAX	protein_coding	6.693	2.31324	12.4983	3.94387	1.02943	0.824199	2.34031	4.16777	0.011894	0	0.094463	0	0.048339	0	0	0.093049	0	0	0	0	0	0	0	0	0
POU2F1_1	POU2F1	Pou	protein_coding	14.9516	14.8161	24.018	25.2311	14.7089	31.6912	23.813	37.0825	3.61271	3.94548	5.52937	4.86464	5.82361	4.59191	4.7796	4.41777	7.12899	5.82542	5.0935	5.85686	4.59601	4.13451	4.16901	4.84399	4.87435
POU6F1_1	POU6F1	Pou	protein_coding	3.28178	3.36436	1.83956	1.98039	4.24198	12.5403	1.24293	2.46249	0.408811	0.438511	3.47081	4.28062	3.79598	2.49647	3.48871	3.81312	3.89432	3.44805	3.13673	3.62864	2.73333	4.23948	2.63272	3.14653	2.57007
POU6F2_1	POU6F2	Pou	protein_coding	0.586495	0.123896	0.452273	0.416433	0.077211	0.167981	3.08823	2.24961	0.173766	0.056246	0.020439	0	0	0.016484	0.039578	0.010815	0.099829	0.08497	0.035669	0.051317	0.057477	0.0745	0.08152	0.155716	0.091563
RFX2_1	RFX2	RFX	protein_coding	4.32943	5.36378	2.64893	3.57702	5.34402	7.81722	5.72147	6.58235	1.50932	1.27681	22.4963	13.7824	18.2178	18.5795	15.208	15.664	23.4548	9.80766	11.6024	7.85114	6.57955	6.07307	7.47523	17.8465	10.5867
RFX5_1	RFX5	RFX	protein_coding	10.4336	10.2617	18.2948	22.0869	13.6397	26.6976	11.8788	23.4466	9.61789	9.90903	15.0883	14.9325	14.5919	14.2651	15.7147	19.9408	16.454	17.944	17.9841	21.0799	21.0622	21.3698	22.762	19.3255	18.0318
NFAT5_1	NFAT5	RHD	protein_coding	47.5153	45.7428	102.086	122.655	53.3146	92.7587	62.0727	117.201	19.1229	20.3238	36.4191	36.126	36.6755	30.8332	33.9201	38.3189	35.53	33.1464	35.137	37.7027	34.5664	28.2266	38.746	43.7725	32.0757
NFATC1_1	NFATC1	RHD	protein_coding	7.38605	9.39432	6.54515	5.40767	4.0174	4.39506	4.4997	4.89606	11.407	9.88763	31.0675	23.2079	21.2944	44.5118	31.3789	44.8179	38.7981	27.6202	29.7187	22.9434	23.3905	22.7934	21.4536	27.7632	30.9546
NFATC2_1	NFATC2	RHD	protein_coding	1.43514	1.15976	1.18018	1.9037	5.70386	9.56392	2.40752	2.48061	3.5772	4.07138	11.8257	12.3762	9.68059	11.6133	8.72299	15.439	12.7103	8.83812	10.7092	7.06045	7.56662	6.35434	3.89784	10.0062	5.62102
NFATC3_1	NFATC3	RHD	protein_coding	77.5338	74.428	40.1006	43.2719	75.7799	84.0568	75.8314	72.0068	29.4051	25.8843	80.2006	91.986	81.1994	79.7514	83.7881	81.7598	90.1564	86.3106	79.797	94.5971	89.9711	90.4145	73.2671	81.8478	84.3307
NFKB1_1	NFKB1	RHD	protein_coding	9.24636	11.6563	46.4008	58.9232	11.0551	9.99676	54.1005	53.6371	11.5765	12.633	35.2313	35.1908	34.4133	35.0852	38.0229	33.7546	38.6131	36.417	35.0981	44.8472	50.1786	44.7153	40.3528	47.8622	38.3645
NFKB2_1	NFKB2	RHD	protein_coding	13.2232	12.0788	18.6639	25.969	11.3753	16.4863	16.474	23.1162	4.9471	4.69854	19.907	20.5107	17.373	21.5146	20.5261	25.6563	20.0474	19.043	19.5445	18.5542	20.673	17.8296	18.143	18.6654	17.058
REL_1	REL	RHD	protein_coding	15.194	14.0418	13.0535	17.8284	17.584	17.389	20.9522	19.0023	8.43795	8.20616	23.7437	21.5208	21.0102	22.7464	25.2718	23.7923	22.7317	21.5987	21.9948	22.8898	22.7724	20.3733	19.1764	23.1124	19.5498
RUNX1_1	RUNX1	Runt	protein_coding	16.1041	17.524	0.662418	1.37481	8.64056	18.9602	10.9029	22.4123	19.8436	20.5053	4.55992	3.23407	3.52541	4.28333	5.4222	3.91155	6.27459	7.38955	6.46328	11.8891	13.0551	9.19425	11.7356	10.3984	13.5263
RUNX2_1	RUNX2	Runt	protein_coding	18.1171	35.8641	14.9342	19.3877	94.1587	147.372	40.7201	64.4464	36.9496	42.0186	1.73144	0.764662	1.1937	2.12583	1.61118	1.79474	2.47418	3.57525	5.24421	9.3067	9.74419	7.09411	9.2817	9.29193	11.1156
RUNX3_1	RUNX3	Runt	protein_coding	52.3306	56.2635	0.5608	0.404695	23.2567	36.6217	4.46993	15.346	44.9632	42.352	4.19801	4.12282	2.91174	5.90198	5.06141	6.72628	8.02049	7.49241	13.5169	28.3862	35.7906	27.7352	36.8789	30.0589	33.2191
NR2C1_1	NR2C1	RXR-like	protein_coding	22.4474	22.2432	26.669	27.1881	18.2379	27.9404	26.1124	35.7895	6.84065	6.32788	18.5714	20.4912	20.6349	19.4388	24.8257	21.2007	22.4544	24.2836	24.128	26.1914	27.6399	25.5705	21.7928	22.4429	14.506
NR2C2_1	NR2C2	RXR-like	protein_coding	16.2337	16.3682	24.8025	22.0251	16.3394	25.4204	12.4108	22.0023	4.99324	4.26251	24.0876	10.6171	8.70804	9.07738	10.8723	9.96655	30.4161	27.3881	26.5726	11.8077	10.2983	9.60119	9.36982	11.9458	10.7473
NR2F2_1	NR2F2	RXR-like	protein_coding	194.492	151.957	30.4646	39.3304	147.641	154.661	19.3375	23.7642	16.6181	14.4469	74.2216	70.4527	67.9615	71.6158	71.5213	73.4189	64.8265	66.1282	62.1925	61.0546	51.2153	57.3811	46.676	56.9412	53.3036
NR2F6_1	NR2F6	RXR-like	protein_coding	42.3215	41.3198	62.5301	68.4285	39.1311	50.6009	64.0277	114.99	28.2305	27.3984	67.3784	70.971	74.1625	60.6866	78.8686	72.5327	60.4576	62.075	63.7663	63.2859	63.5975	68.745	63.3041	55.6427	60.5252
RXRG_1	RXRG	RXR-like	protein_coding	3.77725	4.948	2.70703	14.0024	3.69171	3.43289	17.7639	13.5264	0.512691	0.551486	12.5509	20.3404	13.968	16.8138	14.3334	16.4097	17.1679	8.21385	12.4663	14.0735	11.4256	20.5623	6.43248	12.1126	10.7952
DEAF1_1	DEAF1	SAND	protein_coding	6.61222	6.51109	5.10411	6.32087	7.22807	12.4	7.39552	12.2278	2.39907	2.20771	5.95041	5.45015	6.21397	6.08218	6.91327	6.36368	5.76762	6.26371	6.22852	7.00026	5.93452	6.31274	6.01171	6.11037	4.87726
GMEB1_1	GMEB1	SAND	protein_coding	19.6202	19.8237	19.4652	22.8406	24.4611	33.2072	22.607	26.1909	8.93562	8.54633	16.5634	15.0152	16.1257	16.095	18.3249	18.6303	17.3085	16.2016	16.8459	18.0777	17.2538	17.7888	16.3255	16.3183	14.0743
GMEB2_1	GMEB2	SAND	protein_coding	8.92336	9.62469	11.4749	12.5766	11.608	17.7745	10.4296	17.8824	8.38217	8.89958	16.0222	18.1155	15.7376	15.053	17.2979	20.6761	15.5186	15.7523	19.4286	19.0734	16.7736	18.8951	18.21	18.0336	16.5875
NR5A2_1	NR5A2	SF-like	protein_coding	3.24923	3.39784	0.322332	0.358303	4.1548	3.51552	0.980313	0.621805	0.466806	0.297508	3.61292	3.28755	3.29659	4.76765	5.92581	5.92527	4.87944	3.72155	4.4339	2.00216	2.32487	1.78729	2.30897	2.42831	2.09097
MEF2A_1	MEF2A	SRF	protein_coding	49.5315	44.2272	22.4799	27.0483	46.0128	66.3683	37.6292	44.8851	14.7215	13.5447	53.1401	53.8316	59.8102	55.1056	57.5184	59.5103	62.6569	52.4559	53.7504	58.0908	52.1275	54.0271	40.8909	50.8036	48.0872
MEF2D_1	MEF2D	SRF	protein_coding	18.0101	18.6143	14.5686	17.625	31.8352	45.705	20.9947	37.6233	25.4171	23.3105	25.7507	26.8286	24.5679	26.3685	22.9101	25.7971	28.2547	27.4309	30.806	25.5484	22.3289	23.4961	23.4275	27.0744	23.6504
SRF_1	SRF	SRF	protein_coding	51.3773	52.7187	39.0037	45.4168	56.7621	102.241	36.8879	81.7973	19.7224	21.5159	72.0882	104.629	81.7778	90.8676	82.4682	113.609	71.9771	48.8594	76.8856	69.3736	58.7291	68.213	67.4686	84.5809	64.0213
STAT1_1	STAT1	STAT	protein_coding	34.0509	32.1301	45.7732	53.1751	39.2524	46.7494	51.6366	48.0888	17.4273	18.5718	57.8434	50.5802	53.4456	50.082	55.2818	50.4348	55.2104	56.2057	50.9329	52.3021	73.1119	48.9681	40.3334	46.3552	46.5961
STAT3_1	STAT3	STAT	protein_coding	63.6216	65.3189	38.2616	38.9735	60.7437	68.3846	37.0212	39.8353	25.3618	21.4639	139.21	129.376	131.385	144.006	132.108	153.842	125.906	111.738	122.392	111.509	108.116	111.961	85.0294	104.494	98.1132
STAT4_1	STAT4	STAT	protein_coding	0.023047	0	0	0	0	0.045902	0	0	0.031369	0.03155	0.490425	0.183328	0.05082	0.270705	0.161766	0.3238	0.345292	0.466559	0.511258	1.21677	4.22297	0.791095	0.425425	1.62734	0.431975
STAT6_1	STAT6	STAT	protein_coding	21.9641	22.1475	18.8035	27.1873	16.3446	27.5936	26.7069	44.3494	18.0534	22.0603	77.5551	69.8762	66.987	73.3461	71.6155	83.3717	70.7816	75.4199	74.1646	69.5004	70.6389	66.9877	59.4659	60.6491	63.5961
EOMES_1	EOMES	T-box	protein_coding	0.257695	0.017788	4.11597	3.85605	0	0	0.2615	0	0	0	0.15212	0	0	0.022954	0.042998	0	0.101984	0.113777	0.067277	0.439424	0.637437	0.116706	0.19079	0.257405	0.143516
TBX1_1	TBX1	T-box	protein_coding	7.72573	6.87156	0.231458	0.612586	13.958	16.848	26.4898	43.2138	19.1281	13.6729	65.0749	58.1165	58.0462	56.7129	52.207	66.5898	67.5539	73.1103	82.072	65.8743	54.7452	54.8876	68.1796	75.38	53.8778
TBX15_1	TBX15	T-box	protein_coding	266.9	259.871	0.425032	0.207177	191.86	262.896	0.089836	0.099992	6.96639	5.84354	62.4016	65.3008	63.2548	59.6144	57.7564	51.5498	50.408	60.9727	50.8888	55.1786	37.5808	46.3261	33.0808	41.3139	38.9177
TBX18_1	TBX18	T-box	protein_coding	15.3208	23.3657	0	0	34.9116	53.2352	0.019191	0.046839	2.38208	1.56703	15.7915	17.5279	19.3624	16.4239	20.3349	16.2391	21.9798	21.8303	24.5498	23.1337	23.7449	18.8197	15.8423	20.5609	17.0028
TBX2_1	TBX2	T-box	protein_coding	7.73731	9.50615	1.89081	6.22945	8.51186	10.6287	8.17883	5.36408	1.59655	1.6539	6.94466	5.7592	6.02357	8.05878	5.85127	6.17209	5.6593	6.63331	5.50758	5.65104	4.43747	5.85763	3.73886	4.92654	5.06963
TBX20_1	TBX20	T-box	protein_coding	6.86495	4.75891	0	0	5.27812	9.07653	0	0	1.58788	1.05771	1.68638	1.82379	1.09812	2.13468	3.14393	1.76224	2.89671	3.36996	2.14092	2.45782	2.47762	1.93135	1.73379	2.41183	2.54624
TBX3_1	TBX3	T-box	protein_coding	2.2867	2.52789	0.411135	0.654001	4.30191	5.9165	0.582279	1.03354	2.909	2.74045	14.2925	12.3175	12.7105	14.858	17.5541	14.7441	19.7611	15.079	16.7547	15.7347	12.4017	16.9527	10.8648	15.5115	14.3108
TBX4_1	TBX4	T-box	protein_coding	0.382605	1.11224	0	0.029439	4.32989	4.35958	0.119218	0.127389	0.010858	0	0.417118	0.455278	0.284115	0.670015	0.505802	0.209785	1.58222	1.16112	1.565	2.54983	3.69425	1.50793	0.51927	2.32635	0.986982
TEAD1_1	TEAD1	TEA	protein_coding	121.646	127.882	145.248	155.436	206.95	256.416	141.274	169.999	28.0917	23.3045	32.4178	37.6874	40.7285	37.6473	36.4041	35.102	40.191	33.1418	34.978	37.0547	31.6666	31.2153	28.0485	33.3416	27.987
TEAD3_1	TEAD3	TEA	protein_coding	52.7376	55.9146	67.414	81.0568	54.4997	76.8424	40.1058	48.6799	46.8953	44.9441	70.9125	81.6248	78.785	70.4037	73.0996	85.1847	65.9714	76.7478	67.5814	63.2018	54.2192	61.8054	56.0475	63.7809	60.4736
TEAD4_1	TEAD4	TEA	protein_coding	27.4653	27.581	16.4309	24.6921	32.4618	38.7915	20.2986	17.9941	7.29564	6.90314	25.6183	25.1513	27.4897	25.2972	25.3531	24.6909	25.2649	25.8919	22.0454	25.3476	24.5211	23.2664	18.0018	22.0427	23.667
ATF2_1	ATF2	TF_bZIP	protein_coding	71.9271	67.5406	57.9351	61.9447	72.5929	77.2235	63.6386	69.345	20.0998	19.7001	41.0436	40.9259	41.8783	40.3352	41.9295	44.3791	44.6891	44.8486	46.6537	44.8142	43.9159	40.1136	40.205	41.8872	40.7735
ATF3_1	ATF3	TF_bZIP	protein_coding	1.57776	1.99672	0.969813	4.93437	3.13647	5.53831	6.46865	15.0876	4.05219	3.5792	47.146	66.8004	51.0478	59.0613	57.7241	20.0509	47.3084	15.1605	41.1344	12.7585	13.0839	13.2962	16.2149	71.7597	15.692
ATF4_1	ATF4	TF_bZIP	protein_coding	393.008	439.311	472.53	520.469	396.817	503.29	611.611	703.72	781.357	754.245	942.006	1237.18	1019.83	998.479	1099.28	1178.89	1007.29	1059.92	1042.16	1053.94	994.229	1013.96	1107.93	1203.69	987.215
BACH1_1	BACH1	TF_bZIP	protein_coding	25.8174	21.9059	19.6071	16.521	25.8326	24.7034	25.1894	20.6307	20.2322	14.2613	57.2677	47.9543	54.1424	53.0711	51.6264	42.7942	58.9417	51.8718	53.1889	44.4099	41.987	41.1644	40.6879	44.4568	36.5552
BATF3_1	BATF3	TF_bZIP	protein_coding	1.87634	4.25301	0	0.111653	1.54995	0.758145	0.25841	0.477302	0.110953	0.323383	2.20685	1.05498	0.923372	1.65479	1.31976	0.97731	1.31327	1.33101	0.735797	2.06133	4.80427	2.28495	1.15499	1.71141	1.3855
CEBPA_1	CEBPA	TF_bZIP	protein_coding	9.39404	6.69419	7.85456	8.51092	21.7924	39.9248	44.8836	110.968	112.826	79.7796	218.076	186.549	210.811	231.995	237.803	256.726	157.653	177.244	201.992	178.931	172.224	190.064	126.28	162.455	170.938
CEBPB_1	CEBPB	TF_bZIP	protein_coding	0.305383	0.494476	1.32601	1.60697	1.78709	5.31991	18.5572	46.4647	115.973	91.1889	224.772	268.334	220.314	201.774	232.962	285.988	233.162	220.449	239.907	193.841	208.499	193.91	184.597	234.382	244.641
CEBPD_1	CEBPD	TF_bZIP	protein_coding	11.5757	8.48794	20.7218	28.7757	17.0053	24.7055	16.9804	54.6115	112.891	106.22	243.301	215.957	218.364	165.856	221.184	271.626	304.645	201.305	213.791	183.672	177.694	174.904	126.51	151.301	216.97
CEBPG_1	CEBPG	TF_bZIP	protein_coding	36.3224	35.8395	52.2055	54.6739	44.2313	40.1995	73.5385	58.8726	32.0723	28.5391	82.3545	86.9788	84.1577	84.627	83.4335	79.8636	84.1505	84.442	88.1432	90.4502	87.0034	88.8181	73.7848	83.1314	81.184
CREB1_1	CREB1	TF_bZIP	protein_coding	56.2164	52.1726	40.4621	42.9419	58.1512	54.6732	45.2782	38.0621	11.1732	9.8956	31.4203	36.8846	34.0394	33.0208	35.109	30.8903	34.9205	33.9819	36.4758	39.2529	35.3783	30.4244	32.9631	36.0848	28.7634
CREB3L1_1	CREB3L1	TF_bZIP	protein_coding	240.741	231.901	4.53192	4.90547	78.6289	94.1547	8.28686	7.10362	20.5918	17.2016	176.836	223.766	191.282	137.666	233.193	165.831	172.421	155.054	168.921	132.231	107.355	125.482	95.5561	106.22	123.382
CREB3L2_1	CREB3L2	TF_bZIP	protein_coding	75.3669	66.8117	284.004	239.107	65.2829	70.0852	139.732	103.059	19.7122	14.7726	82.3094	78.7929	75.3424	79.6716	85.0011	85.8738	91.2186	81.0886	79.7865	75.8206	69.4403	68.4161	55.1075	69.1418	67.2339
CREB5_1	CREB5	TF_bZIP	protein_coding	6.56731	6.27222	25.4089	25.1779	12.793	16.5999	15.5772	15.9159	3.8625	2.70091	8.76379	9.25626	9.12529	15.5146	6.88442	9.21852	11.0107	8.4588	12.4562	3.49875	5.06084	3.50096	4.93114	6.65366	7.46227
CREBZF_1	CREBZF	TF_bZIP	protein_coding	7.84662	5.82888	9.14289	7.84981	5.85891	6.48194	6.63007	10.0598	3.06592	2.27097	15.3452	11.3927	11.7429	11.8614	9.77283	11.714	13.2962	12.4101	14.2373	14.7363	9.66258	13.2904	11.6334	11.1456	9.15556
CREM_1	CREM	TF_bZIP	protein_coding	5.47416	4.46548	2.38831	3.66563	7.40948	7.67784	4.32125	5.33429	6.41759	5.07315	37.4601	36.0276	43.2516	36.6895	46.9683	34.9595	54.3084	35.4864	57.8639	27.4898	28.2456	34.51	32.9629	42.7958	23.7862
FOS_1	FOS	TF_bZIP	protein_coding	1.8024	1.7226	4.1876	4.48784	2.36535	148.952	7.9145	392.387	13.7847	15.4865	75.17	46.3046	20.5134	84.9586	23.1796	31.9981	31.886	63.4069	38.9462	16.9983	20.8432	36.6985	45.8667	219.201	35.2338
FOSL2_1	FOSL2	TF_bZIP	protein_coding	5.34297	4.87152	1.79724	1.73561	35.8921	43.6091	15.0105	40.7658	259.12	238.389	51.9474	53.8673	47.7145	59.2976	61.5262	58.8109	64.9929	66.498	53.6562	49.7075	67.8328	47.491	56.6049	60.2303	63.1163
HLF_1	HLF	TF_bZIP	protein_coding	20.3793	19.3048	11.955	12.3494	41.9788	56.7874	18.334	15.8308	13.9065	13.1816	133.365	119.481	161.772	136.809	141.825	118.049	141.329	155.571	113.798	146.23	116.155	103.227	73.4136	97.6514	127.945
JDP2_1	JDP2	TF_bZIP	protein_coding	16.3412	16.8558	19.9691	24.9059	25.4537	30.3725	33.551	35.0741	19.9882	14.8178	143.303	136.234	121.963	116.26	126.042	110.675	107.445	87.3727	107.289	68.2641	65.387	72.6369	61.0665	100.178	69.4035
JUN_1	JUN	TF_bZIP	protein_coding	120.702	151.867	37.5639	39.8324	138.551	491.295	90.0739	361.328	145.727	123.909	492.274	408.478	324.773	507.361	367.942	337.835	369.962	376.874	357.642	216.915	209.716	249.656	294.073	462.353	248.372
JUND_1	JUND	TF_bZIP	protein_coding	71.6244	59.8031	42.0858	48.6846	49.5837	189.952	61.9351	230.748	101.515	78.1522	204.953	233.707	228.84	206.507	219.418	210.851	182.302	117.688	157.16	127.912	132.168	143.802	146.738	209.308	150.913
MAF_1	MAF	TF_bZIP	protein_coding	2.84324	3.88132	1.90396	1.56415	13.6878	14.9911	10.8163	18.3862	32.5407	27.6764	12.0386	12.4775	10.9031	11.7591	14.286	15.9476	14.3166	18.6359	20.3622	23.6032	27.8363	19.3839	28.593	24.0224	25.3508
MAFB_1	MAFB	TF_bZIP	protein_coding	165.223	150.077	8.82979	11.7368	57.4066	50.9547	35.5604	54.0707	49.5058	63.0144	70.5678	63.3332	63.5085	57.0296	62.445	66.823	63.7944	64.1577	63.7747	74.2956	93.672	59.6618	56.3237	68.6397	73.5616
MAFF_1	MAFF	TF_bZIP	protein_coding	16.8803	18.9123	15.2874	17.3377	15.9777	34.6439	17.0535	42.9674	38.8352	49.2783	55.7243	55.1684	49.9414	58.8141	58.3234	55.1101	60.0445	44.0896	46.3498	36.7452	41.8461	38.3768	48.7034	44.5675	65.3745
MAFG_1	MAFG	TF_bZIP	protein_coding	6.55853	7.0771	7.08563	8.20314	8.13083	7.05958	9.35815	8.36516	7.79669	8.23091	15.1299	10.7004	12.4909	12.6968	12.6531	12.2874	11.6406	13.2536	14.7366	14.0736	11.4232	12.1254	13.139	12.429	14.18
MAFK_1	MAFK	TF_bZIP	protein_coding	13.722	11.9495	11.1892	11.1939	13.0374	14.468	14.29	22.3177	15.9122	16.2308	34.4809	30.3792	30.4133	32.066	29.0489	34.0263	30.3128	28.2234	27.7643	27.1765	29.1181	27.0524	27.8724	26.5496	26.8543
NFE2L1_1	NFE2L1	TF_bZIP	protein_coding	69.7578	69.5486	67.7167	70.6019	72.5343	90.1946	79.3655	93.5333	80.059	69.5724	125.89	112.406	125.3	111.818	122.649	137.783	121.519	109.371	119.459	130.235	119.684	119.168	105.67	106.558	118.852
NFE2L2_1	NFE2L2	TF_bZIP	protein_coding	27.957	27.1436	38.5736	49.9921	35.6898	31.2025	44.2424	36.3627	18.6678	17.989	87.4242	86.3887	80.4139	79.0609	74.1504	77.1119	70.6337	80.7993	81.1302	67.1782	77.4065	69.8699	58.3859	68.58	67.4026
PAWR_1	PAWR	TF_bZIP	protein_coding	3.62004	0.945329	37.7177	29.4907	0.661684	0.256837	17.234	15.2636	16.213	11.4294	17.0728	22.0065	20.0641	23.479	25.2779	25.4145	33.9431	33.3889	33.8036	32.7168	30.9228	24.7223	32.4683	33.11	25.6341
TEF_1	TEF	TF_bZIP	protein_coding	40.947	39.237	74.1179	79.6226	61.832	72.1326	72.9588	79.3495	43.1908	47.5029	262.145	270.142	269.702	234.717	236.635	262.652	253.814	243.458	236.728	166.271	156.176	163.544	172.361	211.803	158.807
XBP1_1	XBP1	TF_bZIP	protein_coding	74.9337	70.0067	62.1073	59.585	73.656	78.7195	55.5928	50.283	38.2242	32.4329	209.708	261.852	187.947	214.022	197.576	193.196	163.981	150.299	180.679	165.396	133.998	141.847	160.071	170.142	140.538
OTX1_1	OTX1	TF_Otx	protein_coding	0.051827	0.060207	0.403869	0.977952	0.172471	1.13582	0.352901	0.930689	0.043517	0.110438	2.61175	1.61359	2.33877	3.28436	2.18436	2.83668	2.06957	2.84919	3.10489	4.22409	6.01089	5.28915	3.34839	4.90594	3.92236
OTX5_1	OTX5	TF_Otx	protein_coding	0.79594	0.727697	1.25781	1.00588	0.3891	2.24393	1.62271	4.41555	0.557225	0.382657	1.63103	0.250273	0.711041	0.435693	2.17277	0.313914	1.58264	3.05325	0.571837	0.487622	0.405532	2.066	0.219112	1.82135	2.00287
THAP12_1	THAP12	THAP	protein_coding	19.1324	19.1427	12.4138	12.9835	12.9782	13.1708	18.2233	17.895	5.72611	4.05304	11.0133	11.6816	10.8475	13.0051	13.2338	10.5784	13.9111	14.9043	14.4385	14.1167	14.6844	13.8907	15.8789	14.1555	12.1696
THAP4_1	THAP4	THAP	protein_coding	26.1922	26.8178	31.828	32.4618	30.3275	36.8421	29.6404	43.1522	38.996	31.4051	35.7054	42.2182	37.3972	40.327	40.8937	41.0462	40.1462	39.3615	41.6103	42.026	45.7066	45.0175	45.5969	45.0275	45.7653
THAP5_1	THAP5	THAP	protein_coding	61.4098	50.9372	32.3078	35.0068	57.1543	42.8603	40.3254	31.1205	11.9379	8.77667	36.9199	44.2746	39.9348	37.5937	46.4723	38.4641	40.6617	44.0547	38.4463	43.3319	38.7957	42.7597	38.1777	40.4535	35.7875
NR1D2_1	NR1D2	THR-like	protein_coding	7.65002	7.71928	12.0574	14.7181	13.2329	20.5889	21.7498	22.6815	26.1155	21.4217	116.864	119.917	108.348	89.2779	95.6823	78.8767	117.362	124.156	113.347	48.8348	51.2506	50.1284	72.9102	117.516	48.1288
NR1H3_1	NR1H3	THR-like	protein_coding	48.9057	46.4424	36.3202	36.681	44.6449	45.9051	36.753	40.6187	26.1059	20.4249	104.122	114.121	115.539	105.893	117.495	116.759	108.288	103.632	102.321	101.986	95.7413	99.8706	84.6583	97.5727	91.9344
PPARA_1	PPARA	THR-like	protein_coding	4.00967	3.82799	8.18722	7.23742	4.80671	6.28083	9.25396	6.35468	16.6642	10.5411	33.0751	40.8041	39.2715	33.7252	41.5268	45.3607	39.4016	49.6329	42.3144	32.1326	35.5102	34.5392	32.7147	41.9744	33.7344
PPARD_1	PPARD	THR-like	protein_coding	23.2424	21.7659	38.6226	48.3833	25.9798	26.4484	42.8913	55.2319	18.3142	17.138	38.1384	43.0927	39.2177	43.2007	49.1187	46.5302	46.7955	45.3849	47.024	47.3578	38.1642	43.0558	37.8058	40.0271	47.5046
PPARG_1	PPARG	THR-like	protein_coding	3.40325	1.51924	20.6976	25.7377	4.80427	3.58955	33.4949	37.9242	13.7584	10.5012	65.1527	60.5232	69.77	108.859	100.09	89.7588	68.9442	79.8405	81.6283	75.3996	52.5472	49.6639	60.6666	71.888	48.7894
RARA_1	RARA	THR-like	protein_coding	44.4753	46.6622	65.1979	74.0244	45.823	65.9063	64.0751	98.646	51.5194	57.1797	96.9691	108.728	104.769	97.8954	113.01	122.855	87.9573	100.363	99.3289	115.405	104.398	104.783	118.095	110.422	100.383
RARB_1	RARB	THR-like	protein_coding	36.0605	44.4047	127.913	135.317	32.6642	36.5729	78.4242	78.7432	10.4581	7.94929	22.7044	23.5327	22.2584	18.3434	21.7245	16.688	21.6468	22.2785	21.2913	23.5651	20.475	23.366	19.6525	23.2855	22.0003
RORA_1	RORA	THR-like	protein_coding	5.21329	4.67878	2.2352	3.61623	6.3016	10.7081	8.55414	15.5208	51.1679	45.5608	20.1797	17.4778	18.247	13.8184	14.1149	16.2665	19.3212	16.8966	15.2057	16.4662	20.4988	14.9352	22.9129	25.4702	21.6282
THRA_1	THRA	THR-like	protein_coding	53.8204	48.5333	44.8517	48.1918	42.7874	60.5345	62.2565	86.594	29.7486	28.4823	61.9712	70.8021	64.8501	56.0002	58.3033	70.7037	54.045	46.0313	51.2436	56.1988	44.1466	52.4328	52.3433	53.422	47.1581
THRB_1	THRB	THR-like	protein_coding	0.876045	0.420515	12.3358	10.2926	3.25617	5.77719	33.8815	26.1159	3.29957	4.5723	15.3614	13.8172	13.4424	14.3279	15.534	15.1837	16.1045	15.2819	18.914	21.6662	21.6119	20.4221	19.4901	20.9576	17.1967
VDR_1	VDR	THR-like	protein_coding	2.71994	1.85716	3.13855	3.30803	1.04358	1.45291	2.17161	2.95771	0.534824	0.622925	6.36114	7.17255	5.8472	6.43848	8.17578	8.49264	5.21423	6.14335	6.84371	4.03855	7.30097	5.14958	5.03877	5.93012	5.29426
TSC22D1_1	TSC22D1	TSC22	protein_coding	199.141	143.157	137.237	174.222	236.242	205.989	81.7307	87.7512	49.7171	46.3437	220.374	207.444	192.113	215.43	203.338	222.225	250.052	215.114	237.203	249.49	244.388	247.713	217.53	299.182	232.159
TSC22D2_1	TSC22D2	TSC22	protein_coding	36.485	36.8995	34.8046	37.2565	35.1195	39.9393	33.6447	42.3904	21.6393	18.5651	25.4176	29.3857	27.5421	26.5296	31.8581	32.1493	26.9734	26.0929	27.6551	28.9669	30.9097	26.9096	32.4584	31.5219	27.0655
TUB_1	TUB	Tub	protein_coding	43.9601	33.5831	226.821	291.017	28.6983	32.8872	87.1362	64.5561	23.0044	18.4249	46.7396	43.5235	43.2547	43.2246	50.5599	45.0068	56.5694	46.4029	44.477	56.088	46.9052	49.8538	48.073	56.217	52.9029
TULP4_1	TULP4	Tub	protein_coding	29.4751	28.959	41.6005	52.8555	34.1904	41.3097	42.9793	40.7256	6.23837	5.00878	8.61817	7.9669	8.53114	7.3563	8.27908	8.47809	9.42259	8.25794	9.5131	9.64066	8.02415	9.22627	8.30299	10.6036	8.27452
BCL6_1	BCL6	ZBTB	protein_coding	41.5564	26.0754	14.3649	18.4519	28.1187	40.438	13.9693	27.7899	77.0534	76.436	81.619	72.8163	77.6047	60.8148	72.3451	97.4309	84.4734	89.1222	78.8482	54.4038	58.622	58.643	66.9778	76.6895	62.3855
HIC1_1	HIC1	ZBTB	protein_coding	95.3743	121.472	473.978	550.752	129.64	195.918	41.9712	26.7198	7.22019	4.47275	89.2572	103.351	85.8346	98.5967	107.543	137.118	56.7793	63.6468	76.2885	53.7749	41.7309	57.7482	52.328	67.5351	55.0696
HIC2_1	HIC2	ZBTB	protein_coding	135.996	144.794	135.705	153.67	60.6793	99.6335	148.276	225.688	85.5422	84.1842	22.0484	24.138	16.7976	15.8997	22.1091	19.5985	15.1849	18.2911	20.0399	18.1604	17.7694	15.7858	22.6786	20.954	21.1006
MYNN_1	MYNN	ZBTB	protein_coding	16.6807	15.2792	13.5373	15.6494	16.733	13.458	16.7676	13.828	5.23177	4.13317	18.195	20.0549	19.5078	18.2754	20.1776	20.4604	21.2935	18.4447	20.3516	19.9546	20.3771	19.3659	21.5995	24.314	16.529
PATZ1_1	PATZ1	ZBTB	protein_coding	17.1865	22.2985	20.1508	22.0558	24.4137	29.531	21.3003	20.2298	2.96887	1.76909	3.78025	3.82529	4.43546	3.3175	3.18791	3.85882	5.06771	4.62506	5.20778	6.85314	7.01352	6.45625	6.81716	6.80078	5.06459
ZBTB11_1	ZBTB11	ZBTB	protein_coding	18.5491	17.8194	21.2567	23.4407	17.6537	20.0546	26.7912	28.6461	11.0785	9.52391	18.41	23.0863	21.6777	21.3737	24.601	23.4322	24.7945	21.9235	23.7145	24.7896	24.0197	21.8142	25.8118	26.7482	21.5359
ZBTB14_1	ZBTB14	ZBTB	protein_coding	18.5557	16.6312	16.3572	16.3061	19.0176	20.3898	19.8646	20.6659	5.94379	5.01152	12.9384	16.7787	12.8435	13.8862	13.0119	14.0834	15.5016	15.7993	16.6911	16.9766	16.2965	17.4612	13.0268	16.8021	13.7473
ZBTB17_1	ZBTB17	ZBTB	protein_coding	16.0806	15.0592	24.165	26.614	14.1341	20.9867	19.0326	26.9475	16.5977	16.2422	17.8772	19.3493	20.1047	18.6562	20.2076	21.4561	19.8673	17.8685	19.0589	22.2077	21.55	22.3281	23.0581	20.3356	20.6544
ZBTB18_1	ZBTB18	ZBTB	protein_coding	32.0642	27.0097	10.919	10.5802	9.48828	10.882	8.53582	6.91282	2.31363	1.83344	10.9666	11.4898	10.965	10.7897	12.1148	11.5664	12.4608	11.0243	11.5663	11.3209	9.60659	10.8404	9.47958	12.2922	9.24589
ZBTB2_1	ZBTB2	ZBTB	protein_coding	45.5928	44.9876	33.0644	34.9615	37.9207	32.3074	39.034	35.2895	13.6502	11.2598	31.8655	42.1725	38.0907	40.7631	40.5822	40.7939	35.2505	35.8857	33.7517	38.5477	38.4039	37.4843	38.9179	41.6312	34.426
ZBTB20_1	ZBTB20	ZBTB	protein_coding	2.96084	2.49497	1.94413	1.64447	4.6655	6.37147	1.17336	2.68735	0.736422	0.567147	9.61664	9.78818	10.4258	7.61477	10.2322	6.75996	12.4853	8.85209	5.46978	10.2431	8.8015	8.66702	6.95754	10.4337	9.84711
ZBTB21_1	ZBTB21	ZBTB	protein_coding	8.54985	6.13041	5.78912	7.87797	6.76884	6.56776	8.23281	9.47715	4.46678	3.73124	19.0351	19.5475	22.2322	15.5548	18.1826	14.6977	19.7545	21.8135	17.7544	15.6585	13.768	14.5179	14.8434	20.0356	13.7949
ZBTB24_1	ZBTB24	ZBTB	protein_coding	8.63285	10.4675	14.0011	17.2308	9.48763	8.12731	16.3927	16.5311	6.96457	6.23618	8.53353	10.5481	9.03897	10.7358	11.5423	13.205	11.576	10.3413	12.7949	12.8946	14.0202	12.4464	14.1176	14.2112	12.1686
ZBTB25_1	ZBTB25	ZBTB	protein_coding	9.70578	9.33849	10.8269	9.83829	11.8586	11.7306	9.28331	8.20701	5.2455	4.70766	7.06929	6.00427	7.42922	7.53499	9.57711	5.89472	7.98667	8.59986	7.05879	9.30881	9.69383	9.28133	8.17812	7.34551	9.16369
ZBTB26_1	ZBTB26	ZBTB	protein_coding	16.0469	17.1007	20.0028	21.7735	14.7094	11.5033	19.9747	15.7608	6.03684	4.29357	11.3041	12.5172	12.4775	11.7961	13.1012	13.0068	13.1758	11.9385	13.3727	14.2454	14.4007	13.0051	14.2114	15.9073	12.3176
ZBTB32_1	ZBTB32	ZBTB	protein_coding	0.122161	0.22364	0	0.090234	0.361882	0.447533	0.921044	0.624907	3.01818	2.33215	27.633	8.29772	37.5714	11.178	10.3182	21.1101	41.0511	18.8488	5.51249	26.9348	14.3153	26.2987	5.01824	7.43955	16.9069
ZBTB33_1	ZBTB33	ZBTB	protein_coding	58.3919	57.3149	66.354	74.6549	69.7604	67.228	76.2968	60.4772	36.2326	36.1503	55.1155	72.2781	62.7262	60.1758	70.3798	70.6574	71.7714	61.3959	62.3206	64.5896	67.1228	65.9467	73.3605	72.208	63.9979
ZBTB34_1	ZBTB34	ZBTB	protein_coding	16.6129	19.4847	21.5799	22.7212	19.8807	20.8406	28.1484	21.5055	7.40937	7.71986	14.2214	15.8332	14.4191	13.4067	13.5572	13.9359	16.2536	15.2635	15.9444	13.3729	13.5061	11.3009	14.0025	15.6281	12.5933
ZBTB38_1	ZBTB38	ZBTB	protein_coding	16.8953	16.6008	10.3078	12.8786	22.265	24.9148	18.7537	18.3395	7.73086	7.50629	28.1851	27.8581	29.8783	29.2165	30.4752	28.5074	30.9393	33.9792	36.3026	29.2554	29.9918	29.1595	23.7274	28.9909	25.9512
ZBTB39_1	ZBTB39	ZBTB	protein_coding	16.5596	16.1651	22.6057	24.1147	11.1228	19.2806	16.0357	29.0532	5.13231	5.22528	11.0184	10.549	9.33683	8.30488	10.0046	9.67577	13.0469	11.1049	9.85842	12.2786	9.33084	8.18648	11.6789	11.9166	7.96073
ZBTB43_1	ZBTB43	ZBTB	protein_coding	10.1902	7.86491	12.0395	11.9089	9.86375	9.08289	14.4638	10.5884	7.02375	5.19025	14.39	15.066	13.8363	12.7947	13.2069	14.2095	16.1491	16.8453	15.8723	15.3067	15.8019	13.7255	14.9161	18.5277	12.8988
ZBTB44_1	ZBTB44	ZBTB	protein_coding	56.8095	55.0219	38.6198	54.2636	52.0435	49.0067	51.3214	41.2843	15.1828	12.6946	41.2661	39.3546	43.4264	39.4926	42.9935	35.7883	47.3865	46.0788	42.3513	41.5342	42.6565	39.4776	33.7682	39.7896	38.3517
ZBTB45_1	ZBTB45	ZBTB	protein_coding	6.98031	6.71528	6.569	6.46078	6.46146	8.93402	6.26169	8.28541	4.30317	4.55184	6.24349	7.21554	8.03599	7.00335	5.90865	7.14572	7.55445	6.07378	7.05949	7.0294	5.50395	7.31773	6.47651	6.84498	8.58364
ZBTB46_1	ZBTB46	ZBTB	protein_coding	25.4918	19.4052	18.1618	9.35692	18.4396	22.1535	9.457	7.29169	2.4442	2.05378	20.9239	22.1713	23.4353	19.8986	22.1041	25.2365	18.6554	19.8009	19.9051	19.7996	16.1209	22.3476	14.7772	18.5464	15.5802
ZBTB48_1	ZBTB48	ZBTB	protein_coding	10.546	11.0386	15.0786	14.7544	9.6226	14.717	12.2794	19.506	7.86632	7.04359	15.2212	16.3377	15.1265	16.8377	15.6221	17.548	15.2151	16.3891	16.5462	16.9205	16.9636	18.1288	18.2274	16.8554	15.813
ZBTB6_1	ZBTB6	ZBTB	protein_coding	15.6475	15.7689	22.0108	23.0898	19.7831	17.8392	19.3254	16.6149	11.9682	10.7014	18.9739	19.448	17.8602	19.508	20.4221	20.6622	15.9879	19.3039	20.1695	21.2485	22.3244	20.3273	19.3725	19.494	23.1235
ZBTB7A_1	ZBTB7A	ZBTB	protein_coding	19.8889	19.7702	37.3619	40.1908	18.4652	33.4102	37.9637	68.2677	29.5682	28.1341	50.8425	58.689	52.8203	50.01	54.7441	68.177	46.3988	45.2207	54.5918	55.3638	52.2131	53.9143	52.6135	57.0983	47.9893
ZBTB8A_1	ZBTB8A	ZBTB	protein_coding	15.6436	13.6165	10.3995	11.3081	16.8697	17.4281	8.36885	8.38772	3.36484	2.48675	12.3042	15.0787	12.3202	14.2556	15.5959	16.7972	12.0082	13.1017	12.643	12.6887	10.6141	12.5706	10.6228	11.7918	10.7754
ZBED4_1	ZBED4	zf-BED	protein_coding	38.8039	40.6241	42.1518	44.1845	33.6333	26.5757	44.98	34.7707	26.3626	19.3883	20.3732	28.2469	22.9716	26.0172	28.2197	26.01	29.2291	27.9645	31.4428	33.2213	35.4865	27.11	41.142	39.4157	30.2873
AEBP2_1	AEBP2	zf-C2H2	protein_coding	18.1362	15.5033	10.9446	11.699	16.0605	16.3563	12.0676	11.2729	8.19411	5.47988	17.4963	22.5425	19.9188	21.3449	21.566	21.3956	23.6231	21.6515	23.2395	22.9514	22.1456	19.4478	24.1942	24.706	19.2901
ATMIN_1	ATMIN	zf-C2H2	protein_coding	10.2255	9.58281	15.9589	18.304	11.2867	11.798	19.3214	17.7334	9.50152	8.22123	15.1619	15.726	14.4196	13.0338	15.7151	17.6845	15.72	14.9337	15.924	18.2048	17.6183	16.4816	20.4359	21.9136	15.7939
BCL11A_1	BCL11A	zf-C2H2	protein_coding	9.70431	10.233	58.6657	70.8587	22.8191	29.3448	50.1936	46.8905	5.50491	4.54113	14.8821	16.3998	14.4246	11.3413	13.7489	16.025	13.574	15.519	16.0042	13.764	13.2076	12.6564	13.6111	14.4279	11.9878
BCL11B_1	BCL11B	zf-C2H2	protein_coding	196.136	246.101	116.42	133.117	333.246	133.744	231.257	267.247	17.0161	5.37474	15.5303	15.0827	16.3672	16.4286	3.65492	15.3086	21.3044	23.7221	19.4684	6.3598	7.52432	15.9029	24.6971	27.8871	6.83822
BNC1_1	BNC1	zf-C2H2	protein_coding	70.6418	49.9212	15.755	9.88176	16.2967	12.5935	12.4433	10.4301	7.98491	7.5866	7.39482	12.4971	10.0267	10.9741	9.62443	9.89836	15.8637	17.9493	25.6402	32.6268	35.9736	25.4065	32.7638	36.0022	26.1416
BZFP1_1	BZFP1	zf-C2H2	protein_coding	11.0915	13.4078	13.0357	15.9621	11.3839	19.8907	10.8027	19.5873	3.30504	4.56797	11.818	11.0719	12.0696	11.0281	12.113	12.7999	11.3964	11.6423	11.9822	14.3147	10.8521	11.0544	10.1544	10.997	11.1544
CTCF_1	CTCF	zf-C2H2	protein_coding	94.7204	96.6713	91.296	93.7372	97.3398	96.6992	108.72	98.7649	29.1738	28.3346	48.123	53.5688	49.214	52.3129	50.5337	49.5533	56.5461	53.8336	55.8203	68.7756	68.9691	63.9745	62.6794	59.6059	56.508
E4F1_1	E4F1	zf-C2H2	protein_coding	24.5759	24.0956	25.0138	27.473	24.7695	30.4195	26.0984	29.7854	8.23753	6.66564	23.3241	23.4527	25.1899	21.5948	23.2469	25.1462	24.7059	24.7578	27.4744	26.1089	24.5785	25.7964	24.5429	26.8163	20.1406
EGR1_1	EGR1	zf-C2H2	protein_coding	37.4431	35.0685	175.654	226.286	14.069	240.618	15.7272	374.754	46.8219	86.9259	178.569	131.125	84.3123	161.575	97.9819	77.3059	100.593	133.872	105.674	114.475	135.491	121.255	133.983	375.082	116.82
EGR3_1	EGR3	zf-C2H2	protein_coding	3.77116	4.99633	3.39588	6.25595	3.28991	15.8985	6.2741	74.8596	32.7822	36.9143	40.3826	48.9466	47.4175	43.1432	50.6263	59.7504	35.4524	41.1101	43.5541	42.7232	48.3692	42.9376	40.8156	45.4119	43.9368
EGR4_1	EGR4	zf-C2H2	protein_coding	0.310245	0.431907	0.042209	0.101175	0.123891	12.6395	0.076354	15.5642	0.080164	0.065944	0.226523	0.510088	0.115433	0.419073	0.206043	0.106991	0.200876	0.248681	0.367711	0.650821	0.372761	0.358078	0.665759	2.15137	0.5485
GLI1_1	GLI1	zf-C2H2	protein_coding	24.0669	18.74	14.0486	15.9198	61.6084	98.4796	49.8175	87.2335	3.89097	5.87	6.62601	8.57908	7.85083	10.1731	9.95701	11.2981	11.1608	13.2145	18.4259	21.9422	18.1389	17.6358	19.8022	18.8439	15.4339
GLI2_1	GLI2	zf-C2H2	protein_coding	69.2192	74.8499	35.5328	43.5867	126.309	173.916	74.4513	112.431	11.5204	13.5374	14.2916	14.4316	13.5565	17.7273	17.4837	18.8234	24.8447	23.9469	23.8947	26.6989	14.0454	18.2413	16.3687	21.8665	20.1405
GLI3_1	GLI3	zf-C2H2	protein_coding	82.567	91.9577	48.1439	60.7094	109.811	147.677	62.2369	79.7965	6.92994	7.55269	7.31325	8.82995	9.08256	8.45207	7.40598	8.71176	9.54442	11.4244	9.40788	9.02689	8.57617	7.28994	6.59754	8.50111	7.84289
GLIS1_1	GLIS1	zf-C2H2	protein_coding	1.46957	0.422492	0.300169	0.222741	54.9692	89.3967	0.957192	1.59203	3.13772	2.75423	6.83113	6.98983	6.93623	6.86116	6.51797	5.4418	7.56954	8.89578	6.87683	8.93973	9.36462	8.73921	6.56283	8.47052	8.61613
GLIS2_1	GLIS2	zf-C2H2	protein_coding	41.9537	38.7927	22.0745	23.3215	40.6143	76.6222	20.6686	31.996	11.0925	11.6858	91.9653	89.4317	84.5045	80.8997	84.0348	97.0863	64.4631	56.6439	73.9384	58.2017	43.1808	55.8901	48.4954	52.7721	60.8761
GTF3A_1	GTF3A	zf-C2H2	protein_coding	50.4793	53.7391	60.6248	58.2096	47.6646	50.1387	63.6246	61.6208	15.6439	15.4441	48.9618	57.7439	46.131	53.8376	50.8429	50.2065	45.1239	51.8609	52.9712	54.345	51.738	58.6447	48.652	48.7097	50.3877
GZF1_1	GZF1	zf-C2H2	protein_coding	16.5106	15.5038	16.6432	17.6862	17.113	20.5356	14.7205	20.4543	9.11536	9.14416	25.7477	28.0097	30.7376	27.4949	27.8249	30.5001	28.8201	25.324	28.9353	26.447	24.5386	24.6309	26.9196	26.8685	25.4285
HINFP_1	HINFP	zf-C2H2	protein_coding	9.8544	10.5488	12.4967	13.521	8.58461	10.6992	12.2387	16.7376	5.89554	5.59949	12.1446	11.6794	9.70932	10.5032	11.7774	13.3063	9.05097	10.6627	11.2478	12.2899	12.0235	12.14	9.68771	11.3861	10.0989
HIVEP1_1	HIVEP1	zf-C2H2	protein_coding	23.1128	25.1034	49.9567	62.919	37.0697	56.9023	31.6316	43.8458	9.0757	11.2596	26.0194	24.8685	25.3916	22.6836	26.274	22.8584	24.8802	24.4499	24.4226	22.8576	19.1821	17.7582	17.7577	21.2696	18.3025
HIVEP2_1	HIVEP2	zf-C2H2	protein_coding	5.22504	5.69078	7.49747	9.86954	10.2855	16.2596	9.76599	16.6138	4.31416	4.52009	28.7506	29.9697	30.2715	32.9531	31.8569	31.9718	33.9486	26.4486	28.7131	23.7226	20.5791	20.2743	18.7869	27.1356	23.8433
HIVEP3_1	HIVEP3	zf-C2H2	protein_coding	31.7472	24.9702	4.53608	9.75571	9.56111	17.8272	7.06915	7.99198	1.36384	1.1866	6.8639	5.90534	5.98042	6.54882	5.08358	5.76786	5.79128	6.1598	6.15362	5.87015	5.57828	5.17935	4.70042	5.57976	4.34393
IKZF1_1	IKZF1	zf-C2H2	protein_coding	0.87779	0.698659	0	0	0.640462	0.79375	0	0	0.112729	0.040947	2.02076	2.08494	1.93865	1.81214	2.19928	2.15792	1.26372	1.5509	1.7007	2.02941	5.42092	1.8686	1.86539	2.15731	1.72398
IKZF2_1	IKZF2	zf-C2H2	protein_coding	3.37127	1.67353	57.0862	60.4032	0.880413	1.46956	30.6883	64.7996	4.77434	2.72378	0.89509	0.5506	1.11203	0.876244	1.29423	1.28303	1.17243	0.955136	0.871667	1.29693	1.013	0.64009	0.524999	0.346088	0.356664
IKZF4_1	IKZF4	zf-C2H2	protein_coding	8.34993	8.27119	8.51314	10.3882	10.0107	15.2688	7.93893	10.346	3.96	4.5224	9.17642	8.73486	9.51719	8.29141	10.1565	11.1022	7.81249	8.23138	10.2056	9.97211	8.71967	8.80737	8.47518	9.00829	8.54233
IKZF5_1	IKZF5	zf-C2H2	protein_coding	20.528	18.6833	15.2205	18.1095	17.2917	12.9888	19.3523	10.9555	7.88361	5.10277	22.8336	21.8605	24.218	23.3472	26.9905	25.3593	28.7798	28.7092	27.0728	27.1466	24.7819	22.416	22.999	25.2266	20.6701
JAZF1_1	JAZF1	zf-C2H2	protein_coding	16.1553	14.7283	2.94818	4.38198	29.6176	37.0021	5.17227	4.49501	2.69125	1.97033	26.6856	24.1857	30.0055	26.157	24.6971	21.8819	32.3108	25.3322	23.4408	21.482	16.9618	20.8882	15.5284	17.9586	19.7573
KLF10_1	KLF10	zf-C2H2	protein_coding	17.903	7.67424	15.135	17.2653	12.9811	12.9564	17.2887	27.4491	12.1307	10.4171	60.9556	58.17	59.2763	54.795	59.2012	65.2572	78.3467	61.8292	49.4641	45.9872	47.0351	65.816	46.2049	57.1403	58.2879
KLF11_1	KLF11	zf-C2H2	protein_coding	14.3854	13.212	12.1846	13.7984	17.3318	20.8306	27.4386	39.9504	14.5625	13.3561	21.281	21.414	20.5812	24.1788	24.1689	18.4076	24.0141	23.0439	22.5649	26.0292	28.7287	26.7481	26.2329	28.6958	29.5142
KLF12_1	KLF12	zf-C2H2	protein_coding	22.3905	24.5693	5.30974	5.64219	64.9346	72.6779	5.50177	6.98857	2.12634	1.93374	12.1288	11.3747	11.3669	12.2331	12.5484	11.8803	13.7861	11.0582	11.7464	12.0585	9.33268	9.26028	8.84805	10.4658	8.83571
KLF13_1	KLF13	zf-C2H2	protein_coding	4.5098	5.08048	0.158587	0.148522	5.89513	4.72233	0.725264	0.352904	11.0465	7.41502	52.316	44.9071	58.7417	42.4552	50.8092	44.1263	56.8322	54.9166	55.0063	45.1062	41.011	40.9105	36.8901	45.9779	42.3852
KLF15_1	KLF15	zf-C2H2	protein_coding	14.8871	12.0253	10.333	9.08521	9.3768	10.1485	2.90667	1.75811	12.1159	10.29	50.8078	29.7897	41.2347	38.5457	37.2861	37.6749	19.8229	30.1344	26.1848	13.4313	18.0359	20.0355	13.0446	14.9657	19.4228
KLF2_1	KLF2	zf-C2H2	protein_coding	12.9808	14.4305	0.403195	0.555134	38.2348	39.353	4.97755	2.77894	17.5743	16.1043	169.351	118.184	147.042	157.669	158.329	124.025	124.375	111.802	96.0713	104.116	104.831	104.902	79.1592	123.952	111.72
KLF3_1	KLF3	zf-C2H2	protein_coding	18.9934	12.4293	24.5577	31.5318	11.5818	15.3767	28.682	48.7942	37.4319	35.8844	26.6957	27.7229	30.7239	28.387	29.8188	30.7934	31.3381	34.2214	34.1689	33.0428	41.2491	32.1718	31.7077	39.6425	35.3312
KLF6_1	KLF6	zf-C2H2	protein_coding	61.0637	54.4837	17.5594	21.56	39.9373	46.3995	23.4333	29.6169	34.659	26.4319	111.937	83.1429	86.2603	78.8007	85.1173	74.2756	122.517	82.2183	85.0623	70.37	63.8984	66.8689	55.3704	82.2688	62.696
KLF7_1	KLF7	zf-C2H2	protein_coding	26.2689	21.8405	7.60994	8.98443	17.5874	31.3883	6.92978	18.4392	4.96778	4.60955	9.7469	8.74489	7.64222	6.79776	6.41934	7.26771	7.30781	8.44521	8.71252	7.47665	6.96455	5.48311	4.79283	6.10718	5.56223
MECOM_1	MECOM	zf-C2H2	protein_coding	6.18677	8.14977	1.74457	1.52544	13.2506	10.1133	2.58378	2.90157	1.0756	1.6629	8.63551	8.59481	9.24	10.4252	10.2962	10.006	8.08169	8.00777	9.40908	9.63113	7.14146	9.16622	6.33763	8.1136	8.00773
MTF1_1	MTF1	zf-C2H2	protein_coding	14.8807	14.7356	13.9152	17.1112	12.9891	16.9956	14.1489	18.7139	12.1495	12.117	17.3039	19.6698	20.3124	17.325	21.7942	19.4311	20.4537	17.6933	19.6722	15.9847	18.171	15.6629	18.4352	21.4177	15.8044
OSR1_1	OSR1	zf-C2H2	protein_coding	291.384	324.485	0.36196	0.691238	503.981	546.248	0.662567	0.814178	28.2879	22.0667	118.296	122.336	120.692	110.211	99.6961	95.477	105.96	85.4497	70.144	65.93	45.7826	63.3979	47.1785	58.05	48.4259
OSR2_1	OSR2	zf-C2H2	protein_coding	15.5375	22.5468	0.197806	0	90.5601	162.399	0.186386	0.154874	3.00679	2.49588	56.7943	58.3884	54.6605	44.8348	56.7232	43.1573	39.3326	32.1244	32.4516	28.1015	20.3736	27.8995	17.5225	22.4964	23.2935
PLAG1_1	PLAG1	zf-C2H2	protein_coding	25.457	26.3064	22.6683	25.7263	34.7221	63.4009	16.3261	24.3611	8.23198	6.82166	9.06996	6.87966	7.9849	7.74976	6.88627	7.36337	7.95636	9.49163	10.0266	7.69314	6.78708	7.48044	7.55445	8.72932	5.639
PLAGL1_1	PLAGL1	zf-C2H2	protein_coding	24.0545	20.1924	11.1354	10.5112	13.3647	14.5019	12.7228	12.1859	5.01962	4.11984	10.2831	11.5082	15.0563	11.7031	12.8234	11.8262	11.9861	12.5032	10.7866	10.5676	9.53884	8.73698	7.96623	8.84403	8.62211
PLAGL2_1	PLAGL2	zf-C2H2	protein_coding	22.1409	24.6022	28.1797	28.2623	20.8574	24.1007	26.0916	31.5562	5.04617	4.60775	7.83329	8.31667	8.15634	8.75613	9.13081	8.72086	8.44682	8.95273	8.94929	10.2419	10.0509	7.68054	10.6295	10.2236	9.00413
PRDM15_1	PRDM15	zf-C2H2	protein_coding	8.58953	9.28939	13.0153	13.5538	10.1388	15.2491	13.8613	19.6354	4.59774	4.03427	6.72218	6.84609	6.87703	8.13236	8.66758	8.32098	7.90072	8.4384	6.36772	9.81248	10.669	6.70315	11.169	10.4403	6.92694
PRDM2_1	PRDM2	zf-C2H2	protein_coding	39.2824	41.5725	59.3577	63.4949	59.7014	75.9237	54.6808	67.3643	26.5361	26.3667	25.6043	28.0236	28.5784	27.7838	27.3451	28.4507	29.958	29.6148	29.1636	31.0909	32.1865	28.3231	33.1024	35.1861	29.7673
PRDM4_1	PRDM4	zf-C2H2	protein_coding	25.0688	24.9313	26.4662	28.9791	22.6769	27.8066	20.9166	23.143	4.89354	5.04947	18.3153	20.7657	19.1428	19.2545	21.2053	23.3601	18.448	17.2412	19.2842	17.5979	16.8737	19.2231	15.4257	17.2781	16.3763
PRDM5_1	PRDM5	zf-C2H2	protein_coding	8.25257	7.26315	5.97786	7.15486	13.1591	17.8324	5.82533	5.15648	1.84278	1.35245	10.8548	10.3203	10.9604	9.49785	13.1859	8.05437	14.17	14.284	10.7863	10.3668	9.17329	8.74655	8.01028	8.16264	6.99317
RLF_1	RLF	zf-C2H2	protein_coding	16.4709	16.958	23.3111	25.6267	19.4947	22.2974	25.5938	27.577	10.2309	9.4656	13.4973	15.0915	13.0703	12.4107	14.2807	14.091	13.2937	14.3412	14.5687	16.2369	16.6458	14.1008	15.1435	16.3049	16.0703
RREB1_1	RREB1	zf-C2H2	protein_coding	35.7034	36.4947	67.0739	70.8149	36.2798	53.4788	67.8699	82.101	21.0822	20.3397	19.7481	19.7831	17.6809	19.2326	19.6291	22.5149	17.0872	18.5374	21.7468	21.2783	22.8641	17.3912	18.3899	19.1141	18.584
SALL4_1	SALL4	zf-C2H2	protein_coding	0.755708	0.515319	4.02358	4.84691	0.591505	0.885996	3.30865	4.36531	0.361649	0.221591	0.645103	0.565206	0.803905	0.382046	0.458319	0.483714	0.470238	0.410159	0.439097	0.633534	0.358982	0.318188	0.235545	0.445188	0.323028
SCRT2_1	SCRT2	zf-C2H2	protein_coding	1.79983	2.39609	1.25464	1.6336	2.57759	7.75839	0.091619	1.40461	0.497356	0.350356	0	0	0.2319	0	0	0.122275	0	0.186646	0.349519	0.179447	0	0.246265	0.228739	0	0.115188
SNAI1_1	SNAI1	zf-C2H2	protein_coding	79.3955	79.551	0.385854	0.192164	72.4435	63.5693	0.299659	0.342728	2.22572	2.37665	10.7002	8.83953	9.47635	13.8734	9.90168	10.9947	9.2133	11.6001	6.84766	11.2387	11.7687	10.1663	8.93751	8.04568	8.59761
SP1_1	SP1	zf-C2H2	protein_coding	64.9961	65.6783	86.4311	104.043	68.4753	100.76	99.0253	149.388	47.8984	52.1399	99.0623	100.256	119.002	89.3322	117.591	149.128	103.327	92.8943	99.6531	105.499	91.1794	120.637	91.6893	103.077	100.426
SP2_1	SP2	zf-C2H2	protein_coding	12.0663	12.7875	13.5697	15.3818	13.9547	19.5981	12.8564	21.0428	8.96333	11.5686	14.641	14.598	14.0478	13.7192	14.9731	16.3004	13.6692	14.0909	11.5519	13.7994	14.4775	14.5792	11.9221	12.7719	13.4997
SP3_1	SP3	zf-C2H2	protein_coding	77.281	77.9505	53.3	59.483	93.9652	98.3777	87.4006	83.4418	39.9669	39.5805	69.3724	75.7098	75.1282	67.1755	75.8441	69.2431	74.8087	72.0191	75.5877	76.5753	77.1882	69.235	75.8483	82.2344	68.2893
SP4_1	SP4	zf-C2H2	protein_coding	15.1336	14.8681	13.9068	14.5503	14.6942	14.8386	17.1228	14.672	7.27943	5.7013	8.20252	8.70574	7.38376	7.74685	7.84873	7.83152	8.69557	8.44206	9.10419	9.22405	10.3171	9.15113	9.27228	10.5038	8.14851
SP5_1	SP5	zf-C2H2	protein_coding	138.664	136.43	12.2086	8.86601	4.9868	12.4626	4.58676	3.21592	0.561705	1.10114	2.30795	2.23729	3.31704	3.76267	2.59733	2.53487	3.24431	4.8227	3.8708	2.45567	2.47941	4.78508	2.42559	2.66978	2.92487
TRERF1_1	TRERF1	zf-C2H2	protein_coding	2.73265	1.86694	17.1205	18.3803	3.29389	3.87242	40.1793	47.4886	6.15994	6.16009	9.46345	10.4264	10.4451	9.59508	9.46756	10.6444	10.6704	10.9216	12.3861	16.2573	15.0052	13.0828	13.5526	15.6891	13.1265
TSHZ1_1	TSHZ1	zf-C2H2	protein_coding	11.3138	9.25521	8.91727	7.84276	12.8045	16.4195	4.44615	8.83837	1.57002	1.41724	6.86707	6.30781	7.19731	6.14381	6.62591	6.1199	7.21537	6.79473	6.04953	6.22693	4.22398	5.71266	3.67283	4.90217	4.33481
TSHZ2_1	TSHZ2	zf-C2H2	protein_coding	40.1526	34.1703	0.861817	1.8386	22.1214	26.5081	6.67893	7.1353	5.79067	7.40304	6.2161	2.98047	5.75647	4.44045	6.7971	4.19237	4.41055	6.73408	4.14384	11.7504	12.8636	9.22619	7.47268	13.8565	7.89701
TSHZ3_1	TSHZ3	zf-C2H2	protein_coding	14.8658	15.9692	7.33709	9.3887	13.9023	19.4984	4.06586	7.74916	2.87529	2.22782	9.8991	9.32636	9.41177	7.96353	8.14287	7.75603	8.73613	9.8557	10.191	8.0204	7.56419	7.70963	5.63919	8.22334	7.11163
VEZF1_1	VEZF1	zf-C2H2	protein_coding	79.8145	82.9926	81.7442	84.9843	85.1186	108.999	62.1271	64.0684	12.395	11.2139	51.4937	48.4538	50.571	49.1563	49.5183	53.6265	53.1497	40.5932	45.4985	46.748	35.5161	38.7873	35.5781	40.4731	36.4032
YY2_1	YY2	zf-C2H2	protein_coding	66.786	65.2386	62.3889	62.6465	72.2644	59.4325	81.8657	71.0778	32.217	22.4518	61.2503	71.1253	67.0786	62.9055	70.9623	71.007	63.7105	63.5427	66.5704	71.9495	74.9745	70.008	67.6933	67.2638	66.105
ZBTB37_1	ZBTB37	zf-C2H2	protein_coding	36.8969	32.2726	29.2301	31.9609	37.271	44.285	30.4439	35.7606	22.0595	17.1397	8.71655	29.4695	9.87697	8.47222	9.37547	8.29404	29.1595	17.498	26.6095	7.29358	4.66206	6.39825	20.1496	8.49357	20.0279
ZBTB47_1	ZBTB47	zf-C2H2	protein_coding	22.3203	20.363	8.57385	10.023	28.3829	42.191	7.0413	9.4432	7.73827	6.67404	88.0074	99.8987	82.0692	60.4156	79.8799	89.7815	67.563	67.3956	68.2909	66.8119	54.7568	67.9499	50.0636	59.4904	70.6967
ZBTB49_1	ZBTB49	zf-C2H2	protein_coding	11.3209	8.40741	13.4459	12.1974	8.4735	11.0066	10.5263	12.6213	3.92074	2.83577	8.58504	9.89705	8.11627	10.1109	9.75421	9.53764	11.4071	10.8849	10.4646	10.3888	10.1719	10.6456	11.1504	11.8587	9.02047
ZEB1_1	ZEB1	zf-C2H2	protein_coding	89.8071	99.2387	3.00048	4.14718	53.278	60.7596	3.53918	4.01352	2.79959	2.47527	40.4937	40.0157	41.1649	32.8152	38.0553	36.2403	38.8704	35.3481	31.8828	25.3627	21.8427	25.3354	18.7048	23.2972	21.5404
ZEB2_1	ZEB2	zf-C2H2	protein_coding	162.355	208.262	24.1039	9.17194	560.185	877.228	9.93422	8.64986	27.2503	20.5541	197.949	189.267	176.837	166.36	180.923	189.386	166.462	186.074	197.998	178.72	142.946	142.522	115.54	151.69	129.938
ZFAT_1	ZFAT	zf-C2H2	protein_coding	7.05058	7.05214	8.33885	9.5945	6.4839	10.8543	8.03412	12.4084	4.42048	3.5663	5.16329	6.43645	7.92705	6.16062	6.48931	6.35212	7.63386	8.18753	6.96276	6.87049	7.03285	7.1155	7.12784	8.88905	6.78972
ZFP64_1	ZFP64	zf-C2H2	protein_coding	40.2953	42.103	26.0691	30.7349	38.2251	45.2987	32.2085	31.6615	14.5645	12.9291	56.7487	58.6602	56.6751	53.6966	50.3818	54.7332	55.3798	54.4551	56.8709	53.2216	46.6656	50.0298	49.1002	51.2121	44.908
ZFP92_1	ZFP92	zf-C2H2	protein_coding	19.2663	16.3367	26.6479	28.9425	22.071	20.9459	27.3698	20.5652	12.9985	9.94265	22.7498	21.1372	19.4077	20.0773	21.3719	16.2228	22.1228	17.6051	17.0843	23.8614	23.8351	21.3878	24.1503	23.3538	19.7892
ZFPM1_1	ZFPM1	zf-C2H2	protein_coding	10.01	9.54187	18.0877	21.2392	7.64973	9.24376	24.8993	32.8486	6.01315	6.88225	7.75879	6.94832	6.1586	6.90315	7.50798	6.97639	6.69169	6.05644	7.6932	7.36036	6.95813	7.64774	8.68101	6.76972	7.61632
ZIC1_1	ZIC1	zf-C2H2	protein_coding	132.702	121.9	0.19301	0.166478	146.93	200.762	0	0	6.10873	5.66409	12.3399	9.22208	9.84062	15.1359	11.6683	11.3892	8.87252	15.0671	13.2918	15.6611	10.7933	15.8364	8.63499	9.6618	14.814
ZIC2_1	ZIC2	zf-C2H2	protein_coding	6.24119	4.93438	0	0	1.16574	3.84577	0	0	0.027384	0	0.29334	0.080087	0.238429	0.265047	0.150468	0.143106	0.040865	0.258461	0	0.033718	0.06778	0.036588	0	0.072798	0.095251
ZIC3_1	ZIC3	zf-C2H2	protein_coding	15.5719	14.2163	0.06482	0.123776	38.3421	42.1139	0.059379	0.046786	2.61476	2.21885	2.92983	2.99242	2.50635	4.54474	3.3793	3.33356	4.48166	4.68122	4.97413	5.23627	3.54092	4.28301	3.55588	5.11635	4.49088
ZIC4_1	ZIC4	zf-C2H2	protein_coding	8.16734	5.90126	0	0	6.31416	9.48474	0.013898	0	0.25819	0.182191	1.8367	1.12838	1.32978	1.77276	0.939429	1.62038	0.65158	2.07162	1.29003	2.51274	1.12992	1.76516	0.87936	1.22295	1.81351
ZMAT3_1	ZMAT3	zf-C2H2	protein_coding	14.9655	13.7278	14.2357	13.1869	11.5846	10.5078	13.1086	9.66636	5.02502	4.9021	13.3131	17.0451	13.3921	12.6134	16.3896	16.5393	15.5102	12.503	15.9782	15.2461	14.6663	13.8461	15.2426	15.5151	12.8401
ZNF142_1	ZNF142	zf-C2H2	protein_coding	8.51155	8.70763	11.8135	14.6485	8.48206	11.3364	10.9061	13.4983	5.21106	5.85026	5.7817	6.83887	7.34294	6.4737	6.1984	7.8663	6.56215	6.45478	6.7651	8.05149	6.85052	7.93665	8.84221	7.61986	6.90105
ZNF143_1	ZNF143	zf-C2H2	protein_coding	8.49038	7.73743	9.90714	9.69184	8.16285	9.28117	9.76751	11.1126	5.3651	4.26135	9.13016	10.0996	9.35407	9.45608	10.0362	10.4324	8.64075	10.4349	11.1216	10.1982	10.3387	8.95327	10.6434	11.6904	8.74438
ZNF148_1	ZNF148	zf-C2H2	protein_coding	26.3506	25.8392	11.3689	13.0201	22.2435	25.461	7.04665	11.8382	6.79206	3.31175	8.6883	8.50366	9.92976	8.08736	9.6351	8.80791	9.44107	9.7282	9.80745	10.9521	10.5177	9.49466	9.39932	10.6432	9.12605
ZNF236_1	ZNF236	zf-C2H2	protein_coding	12.066	10.189	11.9916	12.4515	11.5581	20.4332	10.049	17.9407	5.06114	4.28424	6.30844	7.87997	8.47918	5.92113	10.6947	8.04924	9.05894	8.16558	9.9898	8.82072	11.8655	9.798	9.65722	10.1511	9.55509
ZNF276_1	ZNF276	zf-C2H2	protein_coding	15.4487	17.0844	18.985	20.3865	14.7463	18.081	17.6649	19.9947	10.63	9.42931	17.6467	19.9535	19.592	19.6222	20.4742	19.3953	19.7585	17.6322	17.87	22.0322	18.3951	19.6853	19.628	21.1735	19.0636
ZNF277_1	ZNF277	zf-C2H2	protein_coding	33.6509	26.8641	27.7347	22.5799	22.1012	17.614	30.9846	21.4315	9.33421	6.59979	28.5473	33.6125	28.9458	31.0018	29.5791	32.75	27.3596	29.7701	31.2945	26.6466	25.8082	26.8823	27.5813	30.7363	21.4164
ZNF292_1	ZNF292	zf-C2H2	protein_coding	27.1494	28.2589	28.8134	33.0065	31.3256	42.9979	28.423	31.6333	3.91026	3.82039	13.4644	14.0749	13.3731	12.8633	13.1544	12.6551	15.4964	15.0544	14.8299	14.2372	11.8447	11.6026	11.9587	14.7854	11.1477
ZNF302_1	ZNF302	zf-C2H2	protein_coding	7.62792	7.69936	9.96438	11.9574	8.25987	10.6256	9.66569	15.5125	6.54826	7.21735	9.41339	8.44341	10.2426	10.4409	9.66171	9.19183	10.4673	10.1583	8.89167	9.84815	9.6699	9.85356	10.4187	10.6204	8.69215
ZNF319_1	ZNF319	zf-C2H2	protein_coding	15.9161	16.1109	16.4169	17.9857	15.6482	21.3314	13.6176	17.0576	5.42661	6.06255	12.6791	13.8076	11.8659	12.2198	13.6329	15.0999	13.0329	11.1777	15.1343	12.8562	12.0589	12.392	11.6697	11.889	11.2479
ZNF335_1	ZNF335	zf-C2H2	protein_coding	42.7864	40.9766	45.4626	47.7155	37.675	52.9568	47.8167	68.6033	23.8094	23.4185	38.2639	44.4594	38.1095	40.8459	42.864	46.7743	40.6906	38.9357	42.5378	49.0654	46.0503	45.8622	50.1547	44.9474	44.6252
ZNF341_1	ZNF341	zf-C2H2	protein_coding	8.5037	8.37613	9.41549	11.5187	8.92695	13.1549	11.9365	14.2164	6.04594	5.84777	8.55041	8.93296	9.09058	8.98671	10.4019	12.1745	8.94293	8.14666	10.2724	11.6143	8.88085	10.1022	10.5539	11.3955	9.24971
ZNF362_1	ZNF362	zf-C2H2	protein_coding	81.663	80.6266	68.8438	77.2938	87.834	161.094	59.3808	114.02	10.7619	12.3342	50.3263	48.7922	49.6612	43.247	45.8849	52.3068	52.6079	52.3027	54.1402	49.8613	40.7257	47.6201	39.3507	47.382	35.9499
ZNF384_1	ZNF384	zf-C2H2	protein_coding	24.0112	22.9715	28.1921	30.0451	26.9615	32.8978	25.1865	32.9428	7.05275	6.89862	15.1626	17.0327	15.6252	15.9207	16.3308	16.504	17.1657	16.8665	17.5388	18.5887	17.0501	15.7692	16.0836	17.3099	15.5905
ZNF407_1	ZNF407	zf-C2H2	protein_coding	18.8069	17.9366	20.104	22.7448	15.6324	24.3949	21.0747	34.7589	7.37952	6.73228	8.12894	9.95179	10.2449	10.3499	11.1831	9.26151	10.2901	11.4635	12.4639	13.6396	13.8234	11.6151	11.6486	13.0743	10.1607
ZNF410_1	ZNF410	zf-C2H2	protein_coding	33.1067	28.0459	39.7964	35.8112	29.3573	26.3451	33.6439	29.7646	10.2584	9.90678	31.7557	41.4231	34.2079	39.9161	45.7748	45.2538	38.6811	39.6164	42.5268	43.0193	43.7824	40.9693	46.7577	45.328	39.0113
ZNF414_1	ZNF414	zf-C2H2	protein_coding	23.3741	26.2145	22.0392	24.6995	27.6526	46.7303	15.8254	25.5942	6.63194	6.80043	11.0402	10.7341	9.44714	7.38573	10.0289	10.2811	10.0715	10.9576	9.04056	8.52255	8.33607	9.84322	6.6093	8.68125	10.0749
ZNF423_1	ZNF423	zf-C2H2	protein_coding	74.37	70.6778	21.4565	21.8309	91.0054	111.242	12.4896	13.7018	5.57998	5.63466	44.9847	44.0225	51.1756	41.2196	49.8443	37.4371	42.9093	47.3811	40.8879	40.2655	35.9999	37.3777	27.9536	30.5701	36.2404
ZNF438_1	ZNF438	zf-C2H2	protein_coding	8.72106	9.02244	9.23793	11.4736	8.72763	13.784	8.92598	9.61738	3.66855	2.70984	11.6562	11.2392	10.8787	8.97286	11.3728	8.98024	9.5666	10.448	12.739	12.1275	9.44857	8.68996	9.99145	11.1835	8.35495
ZNF512_1	ZNF512	zf-C2H2	protein_coding	50.2234	46.4176	47.216	51.0469	52.2213	54.011	53.0626	53.0731	18.7229	20.1763	39.7095	46.6733	46.657	45.2061	45.6472	41.5116	45.3975	41.9843	45.5275	50.6419	49.3242	41.6387	49.0985	45.6273	40.5244
ZNF512B_1	ZNF512B	zf-C2H2	protein_coding	47.2086	44.3333	33.9217	39.0729	68.7047	103.326	34.0325	45.2573	14.5643	16.2763	51.4789	53.1651	59.4332	53.624	56.5047	57.5511	53.2396	53.9707	59.641	62.7527	53.5931	51.69	46.2485	56.7691	48.0484
ZNF516_1	ZNF516	zf-C2H2	protein_coding	32.156	33.2824	43.096	53.9966	53.725	68.6346	47.4944	55.037	21.4362	18.7787	14.2034	16.0583	15.5171	13.0687	17.1788	16.1929	15.154	15.3994	16.5186	15.3681	16.3513	14.6329	14.764	15.989	15.2673
ZNF518A_1	ZNF518A	zf-C2H2	protein_coding	13.9323	12.9428	15.2638	16.4124	10.9318	10.6507	19.7768	14.2899	13.2627	9.38743	11.2502	12.6668	10.9099	11.4998	11.5295	12.0982	12.9638	13.2477	13.7012	13.8374	16.0752	14.2675	17.3072	18.7142	13.9513
ZNF518B_1	ZNF518B	zf-C2H2	protein_coding	38.5696	36.8225	29.7907	34.3857	45.2902	39.7309	31.3407	22.151	6.49576	4.95587	21.5573	19.371	21.408	18.4459	18.2948	16.2119	21.0635	22.9841	21.1488	22.4235	19.5554	20.1001	17.121	19.8157	15.9773
ZNF521_1	ZNF521	zf-C2H2	protein_coding	36.5972	39.4878	11.8245	15.062	56.4428	95.3252	7.72806	9.59243	7.34717	5.24447	30.7864	31.1242	29.3867	30.9824	32.4962	31.5581	36.3129	30.8601	30.5343	25.9202	23.4626	24.4764	17.4527	21.3023	22.5863
ZNF536_1	ZNF536	zf-C2H2	protein_coding	26.6585	26.7263	0.278433	0.437513	45.3028	77.2999	0.238561	0.124101	2.26916	1.85333	6.4608	6.54304	6.71132	5.33534	5.32845	5.13866	5.9515	5.99284	5.60767	4.62159	3.337	4.15782	3.43698	4.5092	4.13108
ZNF592_1	ZNF592	zf-C2H2	protein_coding	24.2075	24.708	25.0668	28.4625	28.6509	35.2958	26.3786	25.6424	5.49366	5.62611	22.1018	25.4469	24.1475	23.0565	25.541	23.1619	25.8877	24.6744	23.4813	22.0427	20.9423	20.508	20.4819	24.8467	19.5972
ZNF618_1	ZNF618	zf-C2H2	protein_coding	23.6174	22.3593	12.825	22.2192	24.7527	45.495	19.6042	31.837	3.4003	3.1938	19.6829	18.5499	16.6006	16.306	25.6814	21.9929	21.5911	18.6471	18.7522	20.5124	16.2973	15.3561	16.2228	18.7228	16.9649
ZNF622_1	ZNF622	zf-C2H2	protein_coding	33.8921	33.6621	41.1571	41.3699	30.717	28.6348	42.1553	37.1543	21.1036	20.273	30.9302	33.6955	27.4083	31.8494	31.1652	32.4269	30.6155	30.1754	31.5424	32.6483	36.1286	34.7079	39.1671	36.2208	31.5656
ZNF639_1	ZNF639	zf-C2H2	protein_coding	40.7945	39.5932	31.0485	30.7848	39.3439	36.5962	29.3164	23.7106	7.33619	6.13524	34.5206	31.5882	37.6912	34.3318	31.8476	33.4542	37.5165	34.4995	30.3715	32.2015	29.7169	34.4424	28.4559	32.7636	26.3955
ZNF644_1	ZNF644	zf-C2H2	protein_coding	37.0532	34.9863	38.9922	38.9637	41.6774	40.781	37.5008	32.5707	14.4652	11.2862	30.3323	33.4422	32.8189	33.4	33.4667	32.4293	36.8261	35.2861	32.7444	37.9631	32.3934	32.394	35.5628	38.7779	31.4592
ZNF652_1	ZNF652	zf-C2H2	protein_coding	36.281	34.7059	36.1499	39.2773	38.4023	41.159	38.1692	35.492	7.54743	6.61409	44.0868	48.9083	48.8718	40.8861	48.6688	44.4897	45.3491	43.3807	44.5839	48.7656	42.7036	40.352	38.371	45.0779	36.3292
ZNF654_1	ZNF654	zf-C2H2	protein_coding	17.4761	17.833	19.6854	22.9796	18.8446	22.503	23.4988	24.9942	8.60205	7.0788	10.9908	13.7482	13.8383	12.9553	13.2662	13.894	15.4705	14.8375	15.3324	15.4572	15.345	13.5276	17.0109	17.0084	14.115
ZNF687_1	ZNF687	zf-C2H2	protein_coding	13.2541	12.9581	22.6236	27.8208	15.5799	23.3471	22.5658	35.5361	10.1679	13.6809	9.42849	8.86695	10.3506	8.99097	10.3321	12.0853	9.84456	9.97354	9.60873	12.5243	11.9227	12.6069	10.5047	10.6612	11.5946
ZNF692_1	ZNF692	zf-C2H2	protein_coding	9.50214	17.3927	9.88147	21.4066	15.1862	31.1165	18.537	43.0758	3.20556	5.35309	7.04932	6.95938	23.8888	9.1337	12.9148	14.0901	12.2613	6.67461	6.7441	15.6065	26.9307	14.9633	12.1525	8.19053	8.4497
ZNF710_1	ZNF710	zf-C2H2	protein_coding	14.7408	13.4348	9.05932	11.223	12.6365	19.3115	9.12041	15.8025	5.26276	5.83244	17.1852	15.7566	16.3118	15.9761	18.1898	19.3128	16.5808	15.7998	16.3928	15.5054	18.0632	16.6388	14.2015	16.1877	14.9743
ZNF711_1	ZNF711	zf-C2H2	protein_coding	50.9542	48.6179	34.0118	36.2905	43.5507	70.3454	29.8594	47.507	10.6753	8.2531	37.6143	40.3935	38.3591	39.6992	44.6499	38.3854	45.0852	42.6221	39.1228	46.1	40.3884	38.7767	35.2411	46.2728	34.2878
ZNF740_1	ZNF740	zf-C2H2	protein_coding	33.716	34.2908	52.3458	52.559	31.5277	44.1068	41.043	52.5154	14.662	13.0835	34.8775	39.6021	36.3136	40.3704	40.5652	47.6391	40.6219	47.7274	49.0557	45.3895	45.7292	43.1263	41.9805	43.6785	45.0713
ZNF76_1	ZNF76	zf-C2H2	protein_coding	10.4048	9.50546	12.063	12.2426	9.65016	14.8468	11.4913	18.0879	4.65717	4.02292	11.8669	10.3516	12.223	10.2561	10.136	10.8244	12.4785	13.5278	12.2195	14.2986	12.3209	12.52	10.9884	11.8618	11.772
ZNF767_1	ZNF767	zf-C2H2	protein_coding	8.43015	8.16795	15.9077	18.3166	7.41791	11.748	13.4774	18.73	3.84828	2.60555	6.20422	7.2829	4.78935	6.36901	8.30315	7.33758	6.45946	7.86006	7.47471	7.3681	9.08905	9.65628	8.66681	7.89361	8.16931
ZNF770_1	ZNF770	zf-C2H2	protein_coding	12.7682	11.9741	10.8455	12.1829	14.5854	12.2269	12.7554	9.81717	5.14276	3.7169	14.5699	15.3139	13.418	13.0344	11.9481	12.8348	14.4386	16.3049	14.4469	13.596	12.6129	12.5374	14.7672	15.7781	11.1006
ZNF800_1	ZNF800	zf-C2H2	protein_coding	3.23186	2.18998	6.29507	7.2492	1.58459	1.50645	8.98372	6.17069	1.01543	0.770318	2.08607	2.90077	2.0567	2.4457	2.83824	1.81442	2.76486	2.23237	2.12219	1.81034	2.18291	2.13063	2.66891	1.96713	1.59413
ZNF821_1	ZNF821	zf-C2H2	protein_coding	24.1271	26.412	35.5828	45.9298	25.1665	65.861	24.1532	50.8613	12.4862	11.1995	40.7063	37.5043	32.5785	35.1435	36.0857	37.572	36.9273	34.1203	36.4231	31.8074	25.7382	30.6616	34.2482	36.4741	27.9653
ZNF827_1	ZNF827	zf-C2H2	protein_coding	26.7134	24.5083	9.15529	7.43739	17.3091	29.1283	5.64528	8.57017	2.35177	2.51467	11.4871	10.7834	10.8273	9.68952	10.482	10.1721	11.9077	9.25763	10.0167	10.4685	8.15955	8.85909	8.07682	8.97175	7.25833
ZXDC_1	ZXDC	zf-C2H2	protein_coding	23.8403	23.6763	20.9364	23.0804	22.3606	28.693	17.7745	23.2967	7.1192	6.89479	25.8001	25.9938	29.747	25.6835	28.6659	27.1783	27.551	23.2117	26.3594	28.429	23.2581	26.2167	23.4294	25.4966	23.8129
L3MBTL1_1	L3MBTL1	zf-C2HC	protein_coding	4.98468	4.54638	5.98506	3.28917	4.04427	12.1249	4.00367	7.31581	1.30075	1.09951	7.52764	6.67198	5.57355	6.73719	6.59358	6.9559	6.82284	6.65353	6.18551	6.12227	4.84827	5.45056	4.97651	6.53036	4.84433
ZFP36L1_1	ZFP36L1	zf-CCCH	protein_coding	199.93	186.912	105.947	116.962	165.846	302.299	100.2	212.471	48.2118	50.3	345.235	343.725	295.555	368.828	372.449	356.948	340.783	366.232	350.256	269.899	255.277	273.329	252.813	331.634	250.381
ZFP36L2_1	ZFP36L2	zf-CCCH	protein_coding	140.963	152.714	294.974	360.388	228.236	345.857	218.382	275.386	82.0089	68.0637	285.552	279.638	302.333	270.505	289.095	257.608	373.589	336.613	300.339	275.589	251.35	242.508	204.706	230.814	250.252
GATA2_1	GATA2	zf-GATA	protein_coding	1.56914	1.37442	0.794747	1.3895	3.7382	3.60925	0.808533	4.5477	7.28354	8.2218	16.1954	18.4499	13.9072	18.0221	13.7607	15.9414	12.2477	14.056	12.1791	14.7962	11.108	15.7464	10.5109	14.4706	9.12362
GATA3_1	GATA3	zf-GATA	protein_coding	2.13616	1.08424	94.4747	132.041	4.23496	6.8521	556.974	806.98	261.73	275.199	57.7072	50.6735	55.7661	60.7608	54.6824	66.1959	72.3468	72.887	82.1692	98.3116	122.089	97.9309	109.382	107.468	109.317
GATA6_1	GATA6	zf-GATA	protein_coding	0.464352	0.656724	0.093252	0.805751	0.803076	1.64696	0.046799	0.122548	0.372365	0.641075	1.87356	1.20634	1.21836	1.547	1.69957	1.20573	2.48468	2.3055	1.12085	2.39877	1.78905	2.91684	1.74286	1.85816	3.50259
GATAD1_1	GATAD1	zf-GATA	protein_coding	38.7849	34.539	38.8438	36.0804	20.9834	24.5123	37.1018	41.6095	26.1526	21.4785	40.0857	47.3452	42.2187	43.5383	49.0801	48.7571	43.512	45.6799	46.6107	43.3053	46.6568	46.6286	51.3633	52.1118	47.196
GATAD2A_1	GATAD2A	zf-GATA	protein_coding	48.4709	49.0075	68.4545	80.9804	53.7408	64.8226	85.2628	88.4977	41.9877	44.0373	40.4476	44.2375	44.485	40.1417	43.5247	47.6564	38.646	39.9582	47.0976	55.7796	54.0868	49.6502	54.271	55.0022	45.4708
MTA1_1	MTA1	zf-GATA	protein_coding	91.8499	90.4423	100.415	113.861	88.6134	110.378	97.005	109.558	27.5744	28.2762	40.6017	46.1655	42.2964	42.3181	44.1161	47.8953	45.852	44.1687	45.2785	58.2149	52.6522	46.235	48.8512	53.5273	44.2328
MTA3_1	MTA3	zf-GATA	protein_coding	12.7979	22.5092	27.8678	35.1785	24.5583	28.5697	18.6489	26.6391	12.0069	23.4814	8.26456	9.12271	7.89701	17.2822	8.12322	22.4517	9.18502	22.0009	23.0864	26.0636	12.4923	10.9653	35.7373	13.2543	24.1595
TRPS1_1	TRPS1	zf-GATA	protein_coding	7.6591	6.53815	10.2196	7.47116	223.178	384.539	13.3639	22.2875	136.592	127.514	14.9302	17.9558	17.7288	19.6645	22.7022	20.0706	27.235	28.6153	29.1828	39.3682	38.7799	36.1063	39.585	40.0875	45.1706
CDIP1_1	CDIP1	zf-LITAF-like	protein_coding	13.8446	12.0479	19.51	20.8541	13.9756	22.6163	19.2032	26.9487	13.043	14.7225	27.5566	29.2566	26.5573	28.988	25.0785	32.1926	20.864	20.3036	22.1981	22.9707	19.1396	27.9032	19.2542	25.0588	22.3463
LITAF_1	LITAF	zf-LITAF-like	protein_coding	0.265948	0.618651	0	0	0.886642	1.34087	0.425814	0.491737	0.170109	0.126845	3.11756	0.688454	1.36163	1.10849	2.6495	2.17993	1.02305	1.85258	1.06379	1.53532	9.60625	1.43008	0.713543	2.58834	0.633176
PIAS1_1	PIAS1	zf-MIZ	protein_coding	24.8971	23.659	25.7199	31.7414	30.4664	45.5306	29.4447	42.414	19.3084	16.4093	36.5779	30.0974	35.4756	31.3671	32.7655	31.9849	34.2696	31.2301	30.4752	32.958	30.1094	27.376	26.4418	31.448	26.8904
PIAS4_1	PIAS4	zf-MIZ	protein_coding	19.0219	17.8475	22.9228	22.2585	11.9213	18.7892	21.3454	24.5562	8.15219	7.91884	10.57	13.7357	10.021	13.8259	14.5699	15.4821	11.2259	11.6273	12.6231	14.8547	11.994	13.1185	16.6159	8.81778	12.5823
ZMIZ1_1	ZMIZ1	zf-MIZ	protein_coding	70.4573	60.9174	48.6409	51.1018	64.653	81.0459	45.9928	55.4476	14.2323	14.7944	34.1645	32.6316	38.7608	33.0355	31.9995	32.4077	38.2926	34.449	31.5454	32.5013	28.7701	31.0052	25.2946	29.2928	29.2464
NFX1_1	NFX1	zf-NF-X1	protein_coding	26.1723	24.3318	26.3876	27.4656	23.7237	23.6474	31.629	32.6097	13.252	11.0404	20.6041	18.9361	18.8271	18.4247	21.456	20.362	22.6928	18.4808	20.3813	23.4275	20.5963	20.5441	22.8858	25.7145	20.0335
NFXL1_1	NFXL1	zf-NF-X1	protein_coding	20.2144	17.0431	54.7025	59.0866	19.5168	19.1318	42.8344	30.8013	10.3886	9.31889	9.08695	10.3014	9.0641	9.36529	9.26258	10.4208	11.7195	10.4902	12.811	17.6412	17.6988	13.5215	17.1557	18.4016	15.7117
MARCH1_1	MARCH1		protein_coding	8.2939	7.10973	30.4309	29.9407	5.82714	3.85393	11.3548	10.5635	1.3104	1.3034	3.70433	4.01177	3.29611	3.0815	3.38562	3.17911	3.38054	3.11781	3.5774	2.95035	5.42892	2.98818	2.38936	3.66755	2.88824
MARC1_1	MARC1		protein_coding	22.2239	18.2025	24.577	23.0501	22.9253	16.6409	31.7147	21.4646	19.8888	15.0393	52.8984	52.0553	57.1318	53.6058	51.0235	56.562	65.3192	63.8726	55.068	65.0603	51.4875	59.1526	53.1772	55.6028	49.9274
MARCH2_1	MARCH2		protein_coding	30.7372	33.8975	11.7876	12.9147	20.7331	22.4927	8.04732	7.77785	8.18014	7.88352	31.2844	33.1501	30.6144	31.2508	33.7843	38.171	25.2471	26.9771	29.2006	27.7932	24.2262	27.5431	22.9356	24.071	21.6572
MARCH4_1	MARCH4		protein_coding	0	0.028873	0	0.017091	4.40893	6.3522	0.139276	0.087235	0.024343	0.055505	0	0	0	0	0	0.044457	0	0	0.062705	0.251815	0.195223	0.205127	0.186935	0.307425	0.274667
MARCH5_1	MARCH5		protein_coding	31.26	31.0027	27.5907	28.499	23.3177	23.8899	29.4743	28.6173	31.3985	21.1507	28.2732	35.0938	38.9769	33.0238	30.8937	33.4937	37.1765	36.8119	40.4779	48.8293	38.5965	37.3935	40.1537	41.9464	37.116
MARCH6_1	MARCH6		protein_coding	27.1051	25.9623	24.5914	24.7755	24.8024	23.0807	28.6702	21.643	16.9185	12.302	40.2577	48.4783	43.0924	42.9056	45.0676	42.2237	50.4768	45.8205	50.1333	44.5207	46.7121	42.236	49.4376	29.9675	47.6015
MARCH7_1	MARCH7		protein_coding	47.4651	42.3553	45.6088	46.7949	49.45	45.9961	51.9806	46.6727	27.1648	24.5061	61.036	62.0521	60.5278	58.401	62.7879	58.1738	68.4839	65.0962	63.7066	70.1696	65.4069	62.001	65.8252	71.1669	59.1055
MARCH8_1	MARCH8		protein_coding	13.6642	10.7754	12.0748	13.9646	11.9784	9.83083	13.5455	12.2552	4.03587	2.80782	22.0519	20.8405	17.4281	16.2867	21.3287	18.4119	19.2948	18.6622	19.7647	20.0227	21.3167	16.2079	15.5172	18.7006	16.086
SEPT2_1	SEPT2		protein_coding	249.201	205.852	68.9415	75.1093	153.405	96.2697	103.907	56.5105	63.7771	65.6607	44.6202	55.4509	60.2698	52.415	58.5265	41.6899	67.6646	58.5079	48.7042	102.726	125.506	79.378	138.062	94.9359	107.04
SEPT4_1	SEPT4		protein_coding	2.54972	2.08605	0.022518	0.052408	3.38026	4.14707	0.031729	0.121877	1.1528	0.73637	4.29824	4.85323	4.73765	5.42115	5.75017	7.65438	7.78453	7.26722	7.88798	6.30072	4.24594	5.36442	5.14977	5.31782	7.05221
SEPT7_1	SEPT7		protein_coding	480.229	415.325	156.703	189.847	440.671	348.224	261.608	161.604	151.808	119.913	386.383	432.286	401.823	386.91	414.108	346.244	410.215	396.458	382.541	395.065	373.567	362.264	342.862	375.032	346.095
SEPT12_1	SEPT12		protein_coding	12.1592	10.8628	15.1055	18.3423	23.0517	48.7986	34.8981	56.4627	134.01	135.022	3.72412	4.43429	3.78356	5.77246	7.82269	6.29889	10.2981	9.2988	11.2672	15.1585	15.534	10.1325	21.5114	14.909	19.1432
SEPT14_1	SEPT14		protein_coding	11.0785	10.9784	10.3969	10.6419	12.8339	11.697	11.4788	12.2226	12.0054	5.58432	31.5402	36.3604	28.3029	34.94	34.0616	27.5857	30.7729	37.5661	32.0655	27.5898	24.5483	29.6695	22.6666	32.8207	26.1621
A2ML1_1	A2ML1		protein_coding	5.31478	2.44168	1.5876	1.59873	1.63906	6.15576	1.12608	3.75311	0.356645	0.260574	2.88131	2.95881	3.10678	3.82416	3.9168	4.73735	2.96891	4.29213	3.87088	3.10711	2.58161	3.91539	3.91129	2.86454	2.05361
A4GALT_1	A4GALT		protein_coding	1.59828	1.19125	1.97819	2.18149	3.94252	6.85748	2.85624	2.37951	1.78712	0.775955	17.5016	13.6858	18.4174	14.9028	13.7219	14.9337	14.1342	11.745	13.7832	10.9385	8.22185	11.8369	7.08558	11.8525	9.31952
A4GNT_1	A4GNT		protein_coding	0.051492	0	1.11648	1.43346	0.165089	0.203993	2.19113	1.9936	3.69686	3.02762	3.3251	2.66045	2.33472	2.24962	2.4779	4.25786	3.45195	3.98373	2.52435	2.23038	4.00831	3.69755	3.61603	2.91239	4.5843
AAAS_1	AAAS		protein_coding	35.0591	36.662	40.8125	44.0708	31.023	41.3411	53.0168	78.8577	12.8612	13.4287	43.0889	41.4557	40.1754	49.4398	49.1041	42.3297	50.5869	39.1021	49.6054	48.6047	59.4948	54.9175	44.3135	43.2994	43.3051
AACS_1	AACS		protein_coding	47.0135	46.8718	42.8048	41.5865	32.7681	30.8551	44.8622	46.9959	17.5581	16.7504	57.7623	60.3595	60.1308	59.5204	68.2045	56.8273	61.0423	70.6851	64.6405	60.2198	53.814	55.4472	55.9369	54.811	49.1211
AADAC_1	AADAC		protein_coding	0.196762	0.529336	0.675002	1.19576	2.5465	5.83747	1.11565	1.49206	3.03714	1.88899	45.5283	38.6799	46.7739	48.5137	47.1176	49.8246	54.3856	46.0655	45.47	41.0789	34.1964	43.9157	23.4121	27.1674	36.1396
AADACL3B_1	AADACL3B		protein_coding	0	0	0	0	0	0.083733	0	0.034282	0.031385	0.207353	47.8942	40.251	35.8739	33.3483	68.8549	66.9262	55.6118	39.9053	62.5461	19.4384	16.7457	10.4093	38.7146	45.8946	3.98965
AADACL3C_1	AADACL3C		protein_coding	0.068614	0.073214	0.173551	0.137307	0.335668	0.165676	0.079042	0.093378	4.16211	3.18081	4.92413	6.84206	10.907	6.22615	6.69715	5.13957	6.44952	10.0683	6.7068	4.71476	5.46352	6.09991	5.3374	6.16875	5.65128
AADACL4A_1	AADACL4A		protein_coding	0	0	0	0.081404	0.034796	0	0	0	0	0.078693	17.6156	12.5341	14.5097	11.4055	14.3236	18.8536	18.3593	11.9549	17.7711	7.60491	9.07835	8.43927	9.22311	15.6167	2.33556
AADACL4B_1	AADACL4B		protein_coding	0	0	0.083185	0.093734	0.09491	0	0.223585	0.226962	56.7152	42.2587	116.046	114.699	124.21	112.524	121.122	99.7586	145.335	169.373	143.449	85.8383	103.963	96.321	98.4734	124.769	94.5413
AADAT_1	AADAT		protein_coding	23.5147	19.7803	13.22	11.9606	34.3912	37.4687	15.8776	16.0171	6.2385	5.2065	29.8583	24.4889	31.0201	32.0743	30.3832	28.0358	33.1838	38.2188	30.6461	28.236	24.2849	29.2946	17.5002	22.4412	26.3315
AAGAB_1	AAGAB		protein_coding	59.4036	61.9658	47.0413	49.3321	42.4214	42.014	45.1623	45.1857	13.4635	12.6885	27.2516	25.8041	27.7004	31.5061	25.0242	26.9761	31.2754	31.2056	28.1063	31.6144	31.6489	26.9675	26.8933	26.9465	29.4475
AAK1_1	AAK1		protein_coding	42.4402	42.0286	44.9258	45.6564	48.0828	59.6009	37.4125	46.5475	30.2894	28.4528	28.3491	30.1971	30.5626	27.0559	36.3999	37.2109	32.786	29.3493	30.0875	34.1789	33.1209	31.9076	32.1422	32.3668	36.9985
AAMDC_1	AAMDC		protein_coding	12.8038	11.1994	9.3012	13.1673	13.1367	12.7044	17.5147	13.5257	6.50189	8.33845	22.8032	17.0973	25.3908	16.2005	23.3984	20.5522	25.4808	28.0359	24.7361	23.1984	23.9734	35.2678	17.4182	21.0256	20.4418
AAMP_1	AAMP		protein_coding	31.9446	29.0516	35.26	35.0368	28.4758	33.4075	32.2721	41.6186	17.7679	19.3681	40.3949	40.8016	38.4863	35.8497	38.1078	42.0774	36.5327	38.4325	41.7442	40.1178	42.2244	42.1491	38.816	42.4073	40.8654
AAR2_1	AAR2		protein_coding	43.0307	38.1963	44.819	44.316	42.3642	41.4736	46.4639	39.4694	20.1666	17.724	61.207	68.7917	58.6873	67.591	65.7717	67.1882	63.8937	58.9	56.2661	61.405	52.8998	57.4014	51.2493	53.26	52.7722
AARS1_1	AARS1		protein_coding	107.962	110.978	86.6536	85.9733	104.553	106.401	96.3544	93.836	73.1789	75.2942	71.1557	70.0074	82.1588	77.6933	72.9864	70.0142	87.0101	70.3205	76.047	82.746	87.3326	88.3746	85.9313	81.8362	77.1718
AARS2_1	AARS2		protein_coding	12.0018	11.5418	14.8517	15.1847	12.315	15.5263	12.9959	16.1962	4.02546	3.80461	10.7245	12.198	12.4092	12.2639	13.74	13.8143	13.4995	12.1935	13.2013	14.5483	13.1405	13.4399	13.2797	11.8271	10.9787
AARSD1_1	AARSD1		protein_coding	46.6883	36.0352	34.2058	33.864	35.3276	43.4596	36.0554	39.1493	28.8339	25.513	69.1132	68.8433	58.631	57.0562	52.2683	68.9019	70.7683	67.7762	64.3113	67.7268	57.125	68.3276	59.4938	57.1617	62.6345
AASDH_1	AASDH		protein_coding	8.76776	9.3922	7.36175	9.08145	7.28355	13.2726	7.01284	12.1503	4.22099	3.28217	10.5366	11.2963	10.1637	11.2696	10.4076	11.0166	13.2955	14.3356	12.5015	12.0681	12.2862	11.6614	10.6951	12.9068	10.2841
AASDHPPT_1	AASDHPPT		protein_coding	11.6527	9.21514	10.3872	8.74473	11.1505	13.8479	10.9179	14.2986	5.82709	4.22593	8.50239	13.3022	9.77637	9.87302	12.8811	7.71524	11.7197	10.7945	11.6701	15.1106	11.7693	8.37115	13.7057	11.1474	10.2551
AASS_1	AASS		protein_coding	35.9707	33.9936	27.9406	34.2961	29.3331	27.0538	33.7898	36.3723	61.079	55.796	43.9478	44.8215	42.1687	43.621	51.7653	45.0449	47.6429	38.9188	40.9506	38.4338	24.4495	36.8592	22.9309	30.6032	34.8603
AATF_1	AATF		protein_coding	32.5658	33.9363	46.7237	51.4339	31.9509	29.6136	58.8501	56.6559	9.16349	10.0372	17.8998	20.3793	14.9848	21.3548	18.6583	17.871	18.7758	21.8661	22.0697	26.6762	26.7697	25.8147	29.5297	25.5458	21.9607
AATK_1	AATK		protein_coding	4.66057	5.22891	1.50032	2.2345	5.18806	12.8396	0.950738	2.83831	0.888241	1.40694	22.6594	20.5448	24.4227	16.7348	16.9577	24.4711	20.4034	19.5846	19.0247	11.9634	7.91261	13.4643	9.7658	12.6027	13.0639
ABAT_1	ABAT		protein_coding	28.6956	24.8395	12.0489	9.23512	14.2102	13.1902	8.32793	7.48724	4.04806	2.56524	7.92391	9.452	7.11151	10.0608	9.28224	6.30997	9.05139	10.0463	10.2627	9.48283	7.88124	9.15465	7.98443	8.59624	10.3063
ABCA12_1	ABCA12		protein_coding	1.76871	0.371043	17.0206	10.1155	0.537564	1.38132	6.85367	12.9164	164.293	183.095	102.586	104.138	105.691	90.8163	98.3446	103.146	104.906	99.9665	97.2491	89.1212	112.655	83.8575	117.191	107.776	110.834
ABCA2_1	ABCA2		protein_coding	23.7121	25.3623	26.1543	28.297	25.6132	42.6229	16.6249	23.1227	3.79406	2.77824	15.9571	15.261	16.8017	13.6082	15.4434	15.0906	15.3001	12.9856	14.0095	15.0352	11.8157	13.1733	10.9073	12.0231	12.8465
ABCA3_1	ABCA3		protein_coding	40.5578	39.251	40.9999	43.2001	40.9844	54.0337	32.1842	37.6294	31.5942	33.1046	68.7504	73.4429	66.2786	72.689	83.2288	82.5665	75.9486	62.7967	73.0655	69.4321	62.4072	61.9837	57.2025	59.227	68.6404
ABCA4_1	ABCA4		protein_coding	0.277813	0.198832	2.1178	2.50405	0.202849	0.356009	1.10756	3.44813	0.344052	0.544549	3.90267	2.73133	5.34306	1.42115	4.12676	3.51044	2.95625	2.4126	2.58615	2.54153	1.49191	3.21888	1.68754	2.04959	1.22293
ABCA5_1	ABCA5		protein_coding	11.4902	10.5138	17.0653	20.0648	13.8058	21.2688	15.4258	18.9064	4.04327	3.39629	15.5967	15.5939	18.9391	13.2664	12.1831	17.8304	18.6507	17.6997	16.3992	15.9129	14.21	14.3325	10.3154	13.5249	13.1392
ABCA7_1	ABCA7		protein_coding	0.800834	0.899391	1.03592	1.27322	0.810635	4.87932	0.954477	3.88559	0.672555	0.645462	1.33563	1.55929	2.60097	2.0859	1.98882	3.11026	2.49175	3.34095	3.04128	2.38041	2.60735	2.16761	1.96435	2.6606	2.48544
ABCA8_1	ABCA8		protein_coding	1.23741	2.45194	0.090641	0.209499	8.36821	15.7781	0.584898	1.11848	3.06448	2.27947	60.6395	50.8742	79.2307	53.2411	44.5502	58.1075	49.6796	49.1902	52.0688	37.4214	33.9502	43.7188	21.832	36.9201	31.8198
ABCA9_1	ABCA9		protein_coding	1.7949	1.00391	0	0.02055	1.67604	1.80473	0.752805	2.04574	0.397866	0.463416	17.8622	14.5853	15.9908	16.0589	21.6362	12.2456	23.3981	13.9111	13.5061	13.8717	20.0992	11.9507	6.74788	9.59685	14.2285
ABCB1_1	ABCB1		protein_coding	1.24138	0.80973	0.046677	0.017068	2.79298	1.03556	0.029471	0.048567	0.381518	0.725007	1.19461	3.95473	8.94958	3.71932	4.20963	1.69641	1.23299	4.00919	4.14555	4.35665	4.12091	4.07665	1.36467	1.78275	6.1957
ABCB10_1	ABCB10		protein_coding	17.3079	15.5642	14.8812	14.7771	14.7157	17.8875	18.7329	18.4096	9.9668	11.7919	36.2068	40.249	40.1416	32.5874	35.926	34.413	34.4613	38.4839	38.4778	35.4439	34.3782	34.4387	32.4369	37.759	30.9127
ABCB5_1	ABCB5		protein_coding	4.97873	2.05946	0.412796	0.231486	0.466488	0.732663	0.203836	0.020607	0.127804	0.257212	2.04341	2.01536	4.05281	1.7146	1.93962	1.6685	2.23177	1.27329	1.20686	1.08812	0.666471	0.803913	0.747693	1.2681	1.0326
ABCB6_1	ABCB6		protein_coding	5.40858	4.89788	7.98393	9.85403	5.60016	7.58989	12.499	14.3482	14.2049	15.9698	8.05487	9.12454	7.74069	8.3586	7.165	8.92733	9.31002	8.08024	9.88164	10.4074	11.3271	12.2477	12.7978	9.22302	12.4073
ABCB7_1	ABCB7		protein_coding	26.3774	23.6591	29.1003	32.3837	24.1738	25.9294	18.5965	34.7087	11.4726	10.4926	21.4503	23.655	22.7603	22.3646	21.7213	22.7178	26.9798	25.7803	26.1638	30.0783	28.9862	25.9885	31.7378	31.4864	25.0009
ABCB8_1	ABCB8		protein_coding	21.3847	21.944	32.0986	32.5455	25.5498	48.9149	25.7426	50.3074	16.2513	16.8116	46.5262	44.5246	43.3481	45.9719	44.164	46.8205	42.1194	42.4542	45.2197	45.6962	47.121	50.0227	41.7171	40.6473	44.8395
ABCB9_1	ABCB9		protein_coding	2.05763	1.90375	2.99638	4.23655	1.7846	5.44526	3.61198	6.79708	4.84401	3.23783	7.41383	7.63794	7.50136	8.0885	9.74102	9.09635	8.11984	9.41346	9.4857	8.16035	8.03765	8.59177	8.94898	9.6601	7.99527
ABCC1_1	ABCC1		protein_coding	20.6197	19.002	47.8357	44.034	22.1693	25.4009	64.2273	52.4366	25.6239	22.4116	46.9186	48.8283	47.032	45.5765	51.7787	50.2153	53.6283	57.6192	59.5867	65.1926	74.2298	60.2837	73.587	68.8959	58.1654
ABCC10_1	ABCC10		protein_coding	8.10403	8.36788	10.2101	12.5559	8.53848	15.5594	9.29216	13.1501	3.44834	3.11556	12.2612	10.6561	10.7756	8.89973	11.6606	11.7829	11.2563	10.5094	12.4939	11.5477	11.7275	11.1652	10.4708	10.5271	9.58938
ABCC13_1	ABCC13		protein_coding	7.98683	6.3234	3.78741	3.66	5.85749	10.9835	2.59866	4.93747	1.16733	1.26532	6.06479	4.96561	4.86569	4.85749	5.28073	4.4992	6.85249	5.54512	5.64827	4.97691	4.09389	4.6503	3.63571	5.14277	3.97146
ABCC3_1	ABCC3		protein_coding	13.9423	11.8953	12.027	11.5918	8.41594	9.77548	18.0629	22.0908	1.67176	0.986669	11.0502	10.3758	13.5273	10.8282	12.7568	12.7728	14.0517	13.713	11.9234	21.7626	18.0755	19.943	12.8442	15.4377	14.0299
ABCC4_1	ABCC4		protein_coding	5.76872	2.69877	17.2459	9.22231	1.71581	1.87109	10.5807	10.6559	8.9399	9.91427	11.2188	11.738	10.5988	12.4965	13.8499	13.0384	14.9155	15.8024	17.0692	18.1297	19.8895	15.3421	22.1281	20.4774	20.0859
ABCC5_1	ABCC5		protein_coding	20.0567	15.9971	23.5841	30.1002	11.7484	26.2954	16.2331	30.6108	17.441	8.77106	45.8077	58.6301	47.2795	46.5275	57.7483	57.7627	57.5605	66.9677	60.573	56.0753	55.6376	53.443	71.7051	68.5457	53.2363
ABCC6_1	ABCC6		protein_coding	0.562427	0.732222	0.677777	1.43108	0.607917	3.7037	0.648707	1.98273	1.26012	1.01827	5.60189	4.2968	6.81159	6.39443	6.75433	5.78164	5.95521	6.39509	6.8702	5.82297	5.03593	5.15892	3.29401	5.59897	3.6332
ABCC8_1	ABCC8		protein_coding	4.03104	6.68795	3.21338	2.61942	10.5711	12.3881	1.81519	2.04219	2.04885	2.01529	26.0931	18.2181	23.8753	20.3333	30.27	30.865	19.2959	22.3707	20.1441	17.1824	14.8547	16.0132	10.9951	13.6483	17.5022
ABCC9_1	ABCC9		protein_coding	9.83997	13.1877	30.5826	51.1598	13.3923	15.0237	17.9124	5.3585	1.40745	1.49091	9.69988	11.2625	11.3445	9.5053	11.9498	12.8627	13.5261	12.0023	10.5133	11.8659	12.0303	10.049	7.79459	7.76116	8.86736
ABCD2_1	ABCD2		protein_coding	18.9316	18.0333	8.96011	11.1053	15.7317	19.4233	7.73595	7.15249	1.85847	2.49835	39.9284	39.4976	37.9721	43.1377	45.28	35.4283	53.2389	36.0128	36.2516	29.6734	29.3988	34.437	19.3184	28.685	30.3004
ABCD3_1	ABCD3		protein_coding	29.7784	27.0494	41.2664	41.8911	32.1444	32.6253	55.4556	48.6519	79.5298	58.5841	177.253	172.667	160.263	137.48	157.836	167.733	173.09	176.638	170.299	146.139	178.139	149.945	175.114	192.243	149.509
ABCD4_1	ABCD4		protein_coding	13.537	12.6154	15.5227	16.0228	11.6043	18.689	11.9477	18.4608	7.05909	8.61314	20.5165	16.7129	18.4117	21.2881	18.8313	21.189	21.2524	22.3313	19.1311	19.5104	21.8054	21.7518	19.472	20.5604	16.8076
ABCE1_1	ABCE1		protein_coding	206.847	189.195	189.398	163.327	169.349	124.143	244.584	161.164	130.358	93.5439	154.392	171.894	157.144	169.685	158.838	152.641	167.065	182.34	183.835	210.025	231.785	203.127	241.119	233.227	232.253
ABCF2_1	ABCF2		protein_coding	59.0332	58.3155	74.1974	76.7998	52.8582	47.7701	90.8633	81.4193	26.7841	25.5386	47.1668	63.1681	48.557	58.6252	54.6975	62.999	49.9555	51.6638	55.3004	67.556	66.3236	64.338	74.6955	64.7874	65.9441
ABCF3_1	ABCF3		protein_coding	42.3793	40.115	43.2328	45.7131	40.146	56.9425	43.5956	57.6612	25.9715	28.9206	56.6277	58.1561	57.6585	55.469	60.803	69.3449	56.2162	51.8695	64.0222	56.0267	56.6918	60.9587	54.7023	54.1103	54.4123
ABCG1_1	ABCG1		protein_coding	3.51146	3.01778	0.764904	0.417696	2.883	1.57826	9.57527	14.7118	1.17818	0.710647	5.74378	5.58592	4.17078	3.24165	4.05209	4.80092	3.12611	3.22277	3.55691	2.88377	4.26294	2.0578	2.00161	3.23062	3.07319
ABCG2_1	ABCG2		protein_coding	14.096	13.261	0.17996	0.472874	17.5888	12.9273	0.197184	0	3.42437	4.3026	73.5363	78.1229	72.9864	72.1646	82.7375	83.6699	74.3781	95.601	85.2161	66.1473	58.3636	75.4752	40.6781	58.1029	82.0714
ABCG4_1	ABCG4		protein_coding	21.4899	17.9515	0.288105	0.214898	9.3651	12.9371	0.328055	0.794076	1.61084	1.55514	3.50618	3.54816	2.66752	3.09398	1.70176	3.10679	1.34637	1.64568	1.88725	2.26367	2.2603	1.95267	2.76446	2.14158	2.3358
ABHD1_1	ABHD1		protein_coding	8.93753	7.69886	20.9765	19.7472	11.7583	18.5258	17.8452	24.1684	19.2927	22.765	39.5798	37.4123	33.3435	30.8778	38.6557	50.8808	38.3663	33.1357	40.8017	39.9459	35.0695	42.9449	35.6053	33.6151	41.2172
ABHD10_1	ABHD10		protein_coding	12.4258	11.2923	11.3417	15.6826	17.3215	15.3641	12.4997	8.61003	4.81501	3.43939	17.6879	16.2909	17.5762	15.5588	15.5808	15.1838	17.4141	15.6456	16.877	15.4033	15.3536	13.1538	13.9205	15.3426	11.4731
ABHD11_1	ABHD11		protein_coding	2.64597	3.48404	2.65636	4.01244	1.95512	4.32532	3.20522	5.67697	2.37807	2.39866	6.32514	5.5991	6.76139	4.65902	7.60766	7.90326	6.52394	7.41337	4.78778	5.04175	3.61259	8.01632	4.61825	6.26469	5.08518
ABHD12_1	ABHD12		protein_coding	63.2912	60.7585	95.4896	90.3897	53.0505	52.8056	76.0388	81.1582	25.3795	22.9348	77.2653	74.5617	84.6778	80.699	83.7004	78.8095	92.2444	83.4374	76.9152	77.5496	78.866	77.9858	66.8657	73.4961	71.1655
ABHD12B_1	ABHD12B		protein_coding	12.0448	10.7472	14.671	14.4945	9.79952	15.5684	18.1413	24.8077	14.7404	14.0271	263.391	241.692	244.246	337.945	288.423	280.325	276.929	201.053	235.047	207.944	157.351	251.58	136.711	157.02	178.516
ABHD13_1	ABHD13		protein_coding	21.7607	20.3259	15.1566	15.7026	20.5145	18.258	19.3915	14.472	9.66298	7.3477	30.8881	31.1574	35.436	27.3727	24.6973	26.221	34.0813	30.8377	28.0005	27.4193	26.2389	28.4964	29.0302	34.0172	23.7385
ABHD14A_1	ABHD14A		protein_coding	2.81238	5.096	8.07184	8.88679	4.52042	14.2787	6.43451	12.6219	4.1974	4.11557	15.281	18.1536	17.1316	18.5257	23.202	19.463	20.0085	13.4535	11.6234	18.5678	18.1374	20.4945	13.4044	20.4734	16.3375
ABHD17A_1	ABHD17A		protein_coding	61.8055	56.6241	176.337	177.462	49.9022	56.6522	145.091	165.011	42.6563	38.2235	72.061	86.9297	73.3495	78.659	82.868	87.5955	75.3959	79.7207	79.0279	83.2165	88.8179	88.4917	95.836	81.6649	91.4797
ABHD17C_1	ABHD17C		protein_coding	13.5239	11.5406	19.8862	22.4903	10.6552	12.4059	20.3019	18.9575	8.94619	7.36503	14.7469	15.1001	15.0387	17.1526	15.6907	16.788	15.6614	18.173	16.7253	19.0978	20.0442	19.4048	22.7167	17.7742	17.5549
ABHD18_1	ABHD18		protein_coding	21.1395	19.8377	17.556	17.8623	22.3732	14.4704	25.8683	14.126	9.20752	5.17676	28.1337	29.4962	31.9767	28.6595	31.8507	28.8591	33.7466	33.9212	28.0718	33.0076	29.803	29.6108	30.6562	31.7016	28.321
ABHD2_1	ABHD2		protein_coding	20.9836	21.57	23.7658	26.9807	19.5053	21.676	25.3827	22.2169	7.80418	8.18429	78.1135	72.7413	57.3443	57.0797	57.2506	75.0769	69.5894	71.7344	68.9342	44.8345	52.4145	50.5303	46.1701	61.9493	44.8793
ABHD3_1	ABHD3		protein_coding	2.74394	2.24063	0.06526	0.261649	1.45706	1.42489	1.49603	2.95622	1.74229	1.19793	15.221	19.8874	15.5984	16.8747	19.55	25.1972	22.6883	23.6965	23.1383	23.112	17.071	22.0114	25.176	25.9662	25.5143
ABHD4_1	ABHD4		protein_coding	6.85242	4.53766	2.47141	3.12486	3.56364	3.72122	3.96687	5.86325	23.1679	17.6886	53.0671	58.8873	95.339	90.4395	83.4955	52.9292	84.5021	58.6234	57.7638	94.887	57.8614	71.5534	45.2507	55.5856	57.7217
ABHD6_1	ABHD6		protein_coding	7.3103	6.87195	2.16345	1.78618	6.95162	8.96451	2.6351	3.11137	2.30005	2.19453	33.1094	28.0722	36.6034	26.4244	31.2402	35.9623	34.358	22.2961	21.9969	22.6922	20.8542	24.2973	13.1205	20.005	19.6028
ABI1_1	ABI1		protein_coding	89.6685	90.9447	57.4079	58.0095	70.4338	72.5564	53.3279	54.5871	41.3786	36.0825	72.3768	72.4425	70.6903	77.5029	80.5982	82.5444	77.3223	75.9622	78.435	79.1145	81.9653	79.3702	72.228	79.0708	75.9812
ABI2_1	ABI2		protein_coding	111.397	124.111	48.6558	49.2926	91.1675	94.0635	47.8133	48.7875	6.70863	6.66317	45.8913	50.0689	50.9961	44.8926	52.3004	41.9155	52.1354	50.0263	47.0357	51.2512	39.1775	38.0436	34.218	39.4196	39.3184
ABI3_1	ABI3		protein_coding	0.570848	1.11118	0.647613	1.04101	1.67789	3.54343	1.00879	2.91865	0.785277	0.705714	6.29221	3.09934	3.19745	2.92822	2.90918	3.8458	6.24862	2.25502	3.21011	3.36133	3.11429	3.98598	2.33866	2.24047	2.90722
ABI3BP_1	ABI3BP		protein_coding	2.10412	1.54544	12.379	16.8012	17.2449	23.7502	53.4824	28.6528	5.31251	3.52427	195.392	236.275	264.432	120.614	169.924	144.949	200.122	186.904	149.268	175.432	117.916	99.9373	93.1186	110.555	120.383
ABL1_1	ABL1		protein_coding	119.31	115.392	95.427	94.0712	153.318	178.054	106.055	95.0296	33.3892	30.4817	122.475	124.056	127.361	119.832	129.07	133.954	108.05	111.383	109.908	112.706	95.6442	109.287	86.7103	103.236	95.204
ABL2_1	ABL2		protein_coding	17.3619	15.7594	19.709	16.0789	16.1534	23.149	14.8859	18.1935	8.94114	7.05231	9.48447	9.81199	10.4793	10.1592	11.6619	12.1887	10.6275	9.48362	12.1724	12.0138	10.0728	9.60587	10.5357	11.4728	9.81948
ABLIM1_1	ABLIM1		protein_coding	9.13171	9.55867	21.77	21.4199	3.85542	5.32143	12.082	14.9659	36.7087	41	25.27	23.8116	24.6801	26.4593	25.2539	26.6438	32.1183	29.8194	28.989	20.2472	21.8012	21.5623	18.7322	20.1135	28.8186
ABLIM2_1	ABLIM2		protein_coding	1.76382	0.895284	0.204801	0.27199	1.81911	1.56403	0.569419	1.23548	1.49904	2.37981	10.1876	13.4729	13.3373	8.92429	15.439	17.6934	8.14406	8.74915	9.14184	9.73802	8.41023	7.63613	6.48225	7.39487	6.18055
ABLIM3_1	ABLIM3		protein_coding	14.0727	12.5101	0.434666	0.122824	8.72161	11.0045	0.860107	1.96576	3.98778	4.33671	22.1225	19.4107	18.4283	18.2774	17.4038	24.3497	15.9121	21.6784	19.0032	17.2666	14.8963	17.5113	15.8748	18.0724	13.461
ABR_1	ABR		protein_coding	19.8676	19.644	11.7606	10.5927	16.4185	22.5388	11.168	15.5063	12.994	15.9771	71.0608	60.974	72.5486	66.4609	63.1054	100.98	62.573	52.8464	53.7648	43.0445	41.0546	49.9052	31.9867	41.0141	39.3765
ABRACL_1	ABRACL		protein_coding	46.6793	45.5848	26.5064	23.0483	32.2384	22.4273	24.7436	20.0735	17.7326	13.6076	61.2176	61.7255	62.7439	49.6666	65.9884	61.8177	59.0171	74.7084	61.5834	63.0343	71.5012	55.0797	61.859	58.0174	56.0002
ABTB1_1	ABTB1		protein_coding	15.3744	15.1307	18.2561	18.3476	20.6878	23.4228	16.9134	17.7652	13.1536	10.8324	41.0751	33.1643	38.9301	34.512	37.3438	36.2275	41.7876	42.8013	36.8399	36.2832	38.4805	38.2368	26.8946	35.8788	30.6501
ABTB2_1	ABTB2		protein_coding	26.7731	39.59	31.8029	25.9916	21.1217	26.5457	25.6567	26.0985	22.9276	20.6719	13.2417	13.6456	14.7581	10.6319	13.7012	12.2995	17.9196	14.9761	18.1228	17.9794	19.1683	15.8116	19.5483	19.3857	18.7878
ACAA1_1	ACAA1		protein_coding	27.7241	25.1525	32.5129	37.2273	24.5421	25.6021	33.4847	30.309	36.4318	22.2523	120.667	103.742	111.634	106.037	106.861	129.213	117.892	118.176	104.475	105.467	108.026	112.418	84.5727	92.4886	99.6589
ACACA_1	ACACA		protein_coding	76.7337	64.1506	57.5755	67.7026	41.0518	54.7264	53.85	68.9471	14.0427	14.8003	73.5295	80.7848	78.1294	68.1493	79.0682	77.5262	71.6005	84.0576	79.2853	63.7091	62.7658	52.8341	56.3858	62.1879	58.8006
ACACB_1	ACACB		protein_coding	0.033489	0.097275	0.032776	0.362522	0.161648	0.445263	0.1023	0.295273	0.018051	0	3.57944	3.71818	4.01331	3.04927	2.59672	6.03366	8.49557	3.37799	2.38722	6.61193	3.90042	12.869	2.01468	3.33323	5.16493
ACAD11_1	ACAD11		protein_coding	25.5402	23.7963	24.5482	27.3457	15.2105	19.9982	17.2881	22.0056	7.23293	4.98735	22.7622	26.1138	30.8393	34.144	38.4955	36.5099	30.455	23.1602	26.9332	26.6743	25.9046	34.7311	17.881	23.3955	24.4047
ACAD8_1	ACAD8		protein_coding	26.7397	21.7072	19.0339	16.8527	26.7476	32.4245	14.0988	13.3311	3.90779	4.26014	25.4372	24.9073	27.0559	26.1252	23.5094	23.1841	23.6678	23.6714	21.893	24.1058	20.6756	25.2841	16.1963	19.9705	19.965
ACAD9_1	ACAD9		protein_coding	114.76	117.223	117.301	116.578	115.398	111.515	138.199	128.453	114.657	110.206	145.112	163.838	159.531	163.832	157.414	141.088	185.462	160.705	157.829	170.99	164.147	172.019	161.756	151.33	184.464
ACADL_1	ACADL		protein_coding	170.982	143.194	129.438	111.088	111.117	111.678	128.84	110.444	120.522	83.9448	245.404	242.23	244.288	238.104	240.062	226.221	238.784	239.314	212.02	225.824	213.706	232.591	188.112	203.342	206.636
ACADS_1	ACADS		protein_coding	34.961	37.5454	44.1912	48.6215	34.6051	41.2838	43.7525	52.2155	31.916	21.5806	48.7803	57.6453	54.2706	49.1877	49.6803	42.6301	44.7407	47.4372	49.731	61.3108	47.1834	47.3585	37.6885	42.0893	44.2271
ACADSB_1	ACADSB		protein_coding	48.8696	43.1859	30.5931	28.4714	26.5439	30.1304	31.4943	21.1199	5.9052	3.65925	22.6624	27.3803	27.745	25.2804	21.7971	23.192	25.511	27.8435	22.1679	21.7834	21.2132	20.6298	20.8421	18.5133	22.7707
ACAN_1	ACAN		protein_coding	0.132768	0.106401	0	0	0.832488	1.83638	0.013267	0	4.50953	4.43035	0.662979	0.964772	0.834615	4.74982	4.22422	1.67065	4.40884	3.99729	11.0907	10.3554	8.89008	5.9415	6.32587	5.53806	5.66256
ACAP2_1	ACAP2		protein_coding	157.57	131.903	27.8504	27.7724	66.9421	67.0098	31.829	31.604	20.8517	19.685	49.2802	48.2036	47.5053	47.7906	52.1119	52.6968	49.8339	47.9579	47.3554	46.1374	45.0261	44.0801	37.6743	44.1103	38.2724
ACAP3_1	ACAP3		protein_coding	40.4734	33.915	3.34245	5.03536	13.2152	22.1251	8.53239	22.839	10.1302	10.5312	48.1587	48.1283	42.9753	37.3546	45.9223	44.7894	41.8198	46.5397	54.2512	42.3787	37.9054	39.5203	41.5424	46.5338	29.7112
ACAT1_1	ACAT1		protein_coding	259.717	237.215	242.4	217.841	144.534	128.183	206.758	177.984	102.164	105.828	204.258	194.59	202.257	246.479	208.578	163.869	209.675	203.432	184.381	205.27	191.329	200.168	183.783	175.179	181.195
ACAT2_1	ACAT2		protein_coding	76.6623	62.5945	84.3726	81.1488	56.5471	47.1117	83.0593	62.535	22.5848	20.8263	58.9602	69.5503	69.3315	66.0023	85.0625	56.6107	65.451	87.9757	83.8612	89.3232	79.3837	75.0617	96.6347	80.6697	80.8336
ACBD3_1	ACBD3		protein_coding	46.5909	43.071	38.3568	39.812	35.7735	35.4923	35.3603	31.1729	29.8775	22.496	72.4141	82.8092	67.7826	68.1606	74.8646	81.0504	65.7929	67.6706	69.7377	63.4578	62.9672	62.9574	60.484	62.7885	55.7984
ACBD4_1	ACBD4		protein_coding	9.84187	8.82926	13.2365	13.2335	8.83891	21.4413	12.356	29.9752	6.87686	7.36427	43.33	42.458	42.3165	39.4374	43.9754	49.275	31.5466	34.4248	36.2454	37.9298	27.9126	34.6162	32.4445	27.5578	31.457
ACBD5_1	ACBD5		protein_coding	27.6908	26.4495	21.9221	22.0484	23.0366	24.4525	20.1884	21.6633	34.5299	23.4077	94.2668	86.4224	95.5314	75.3273	85.2705	85.3134	108.846	86.3257	80.3902	81.72	82.8998	98.3445	71.8475	75.6659	80.0577
ACBD6_1	ACBD6		protein_coding	58.5553	55.9105	56.8479	58.2823	51.3426	60.7843	59.4733	66.9055	20.5232	20.7764	53.1311	53.0205	54.7391	51.9202	50.7684	57.377	47.9257	53.7836	53.5763	56.024	54.415	55.1836	46.9017	48.8098	48.916
ACBD7_1	ACBD7		protein_coding	42.2664	38.2878	11.2648	9.11181	25.8279	29.2638	12.9074	13.0229	27.2764	20.8173	59.6067	53.6188	49.2258	43.9629	37.8504	61.4624	34.8607	38.0654	40.0816	28.8283	23.9933	25.8013	28.607	44.1578	25.0011
ACCS_1	ACCS		protein_coding	7.22394	7.18405	6.22828	7.13051	10.6704	17.4661	7.21577	7.38563	2.37602	2.44891	8.12302	7.30005	8.12866	7.28105	7.67318	8.80022	8.09111	7.92683	8.20477	8.57054	7.30145	7.73926	6.76154	7.90606	7.46851
ACCSL_1	ACCSL		protein_coding	1.58274	0.827224	3.27329	2.6876	0.34511	1.03559	3.98612	11.3636	2.24081	2.29196	1.39979	1.30685	0.807046	0.870198	1.02454	0.701469	1.62258	2.20899	2.35503	1.69872	2.10052	1.5293	2.4405	4.52455	3.23488
ACD_1	ACD		protein_coding	16.0743	16.1906	19.9035	19.9893	13.9641	16.978	19.5288	21.015	7.62563	7.27523	20.6198	22.7363	20.5809	22.2339	24.8358	28.0963	20.9271	22.3389	21.2655	22.1108	21.575	23.3457	25.1952	26.5178	23.8503
ACE_1	ACE		protein_coding	1.20779	1.20588	0	0.020216	14.2754	19.6854	0	0.0211	2.32606	2.28803	27.5207	31.2756	32.902	57.7877	85.2327	30.5292	43.9888	46.3937	47.725	49.8535	32.4187	41.9678	12.6336	15.5848	31.7552
ACER1_1	ACER1		protein_coding	0	0	0	0	0.016664	0.057841	0.058124	0	36.5978	60.3143	390.702	356.074	393.874	322.809	366.693	330.045	322.494	389.323	417.823	129.654	165.281	169.644	223.585	286.097	114.767
ACER3_1	ACER3		protein_coding	22.3698	22.2955	15.4779	15.7627	23.0007	22.593	17.7011	16.9218	22.7573	17.2131	28.7855	25.472	26.2963	26.9813	27.8086	28.5345	33.6336	32.4099	33.0281	47.1931	44.2887	41.5835	48.7578	49.5997	44.493
ACHE_1	ACHE		protein_coding	1.7911	3.55072	1.36627	1.38706	4.93653	22.1988	0.581533	2.67644	0.834507	0.67082	1.12357	1.41406	1.84762	1.37058	0.930761	1.91956	1.67663	0.979336	0.976546	2.03374	0.694203	1.2874	1.30889	1.0108	0.691016
ACIN1_1	ACIN1		protein_coding	70.0285	73.4622	80.7786	79.7065	63.3709	104.435	78.2711	124.598	22.7108	30.1299	47.2078	42.3024	44.1018	43.567	47.6466	46.3916	46.6886	53.9322	56.0904	65.5122	54.6217	56.4047	54.4454	50.7405	50.9024
ACKR2_1	ACKR2		protein_coding	0.631429	0.755384	0.027693	0.104225	0.367759	0	0.234852	0	0.069996	0.037266	2.07238	1.78631	2.34819	1.91078	2.92721	2.16074	2.53356	2.73149	1.35198	1.8944	3.09328	1.54783	0.936293	1.03521	1.54002
ACKR4_1	ACKR4		protein_coding	1.71544	7.38032	0.02341	0	4.71626	2.2774	0	0.075629	3.63341	1.65887	20.7923	15.5885	13.731	12.7882	21.3875	17.0324	42.7267	36.2443	43.3984	18.2025	41.3231	25.5956	22.7052	29.894	23.9139
ACLY_1	ACLY		protein_coding	133.618	143.487	201.961	209.343	114.636	105.283	234.392	207.124	38.3718	41.1525	111.597	122.478	114.854	109.129	124.575	122.836	117.272	126.314	135.618	130.75	126.423	112.578	118.259	114.645	114.261
ACO2_1	ACO2		protein_coding	156.854	158.862	166.438	165.811	149.17	146.828	172.703	173.087	76.1166	73.6834	149.229	157.015	176.195	160.746	154.336	142.451	153.543	137.618	154.151	164.697	157.698	163.779	139.868	151.689	158.437
ACOD1L_1	ACOD1L		protein_coding	0.154202	0	4.27604	5.81074	0	0	0.837193	0.570347	0	0	0.196733	0.089157	0.085623	0.078234	0.191271	0.232833	0.061168	0.028012	0	0.026932	0.100294	0.081463	0.078111	0.080705	0.051755
ACOT11_1	ACOT11		protein_coding	6.21396	4.46486	5.80733	6.98564	5.00157	5.29425	5.95441	6.81266	4.03607	3.47949	10.3318	8.46626	8.81348	8.1486	7.82401	7.03669	10.024	9.31159	10.8772	6.33989	8.18992	7.45375	6.86337	6.90161	8.79587
ACOT13_1	ACOT13		protein_coding	35.3298	36.1418	53.0067	59.0184	41.2792	23.4953	63.9269	36.8553	23.8359	21.362	121.587	113.688	171.737	153.183	96.3892	97.3205	123.766	173.512	131.409	101.866	82.0107	108.124	81.3063	77.4886	89.4393
ACOT6_1	ACOT6		protein_coding	4.34617	4.91134	12.1817	13.3398	6.24511	6.01417	10.0076	9.62693	22.9178	17.9819	51.8844	42.6719	43.6667	39.5714	37.8914	34.07	35.6749	38.6908	38.3918	32.2408	27.4294	31.856	26.9029	33.181	27.7481
ACOT7_1	ACOT7		protein_coding	23.6487	17.1149	19.5598	19.6874	17.7669	20.9178	30.2267	44.8036	10.3212	11.7812	23.7148	30.1904	22.5813	32.2404	30.0179	36.9204	28.8026	37.9885	34.5668	44.9511	47.1222	44.6812	49.8587	45.6001	42.0117
ACOT8_1	ACOT8		protein_coding	9.42047	8.32371	15.2032	14.4601	7.06604	9.14491	11.8421	16.6459	9.42744	8.32598	29.5951	33.4838	34.3231	38.342	40.9857	40.3551	35.986	32.902	36.2836	44.118	35.9417	35.5942	41.4469	37.5441	33.7049
ACOT9_1	ACOT9		protein_coding	55.9119	40.1948	35.4997	34.4038	34.5933	28.5448	32.6558	30.9	5.79429	4.0847	44.4386	53.2112	54.9056	53.0746	39.5712	53.102	53.8349	54.7885	48.7242	37.2603	46.196	44.8546	30.1917	27.879	38.4068
ACOX1_1	ACOX1		protein_coding	38.9987	39.2508	39.6247	50.0089	33.1226	32.7796	36.5666	38.5562	17.2203	15.5024	87.9563	89.8075	89.7464	91.5165	89.368	94.0101	110.513	87.3849	92.8022	83.5781	93.3694	91.5587	76.6728	93.7586	81.5319
ACOX2_1	ACOX2		protein_coding	1.66389	0.497005	55.362	42.3801	1.60759	1.64829	34.268	40.5581	14.7546	12.9282	8.55788	22.8925	16.4948	13.9972	19.8146	20.8106	17.7599	20.5637	22.7707	24.0102	15.537	22.0897	18.4261	16.1572	20.3755
ACOX3_1	ACOX3		protein_coding	4.84713	4.38689	4.38016	5.33246	4.97969	5.25668	5.15558	4.70585	2.16113	1.84327	11.7003	10.6885	12.317	10.4849	8.30293	9.13437	10.1848	11.3323	11.2865	8.32115	9.55798	9.8386	9.18948	10.9151	6.79997
ACP1_1	ACP1		protein_coding	85.9981	77.995	83.1507	82.0927	61.5416	55.4121	89.5993	76.351	52.5277	37.7699	80.3245	94.2214	79.482	110.617	104.665	98.9164	116.377	119.075	124.879	116.511	110.422	108.418	135.834	115.065	106.501
ACP2_1	ACP2		protein_coding	32.3028	26.9187	31.258	35.699	20.0785	21.1796	38.7621	41.4191	11.8637	11.2717	28.0172	26.8634	26.8478	24.696	26.9408	29.4177	26.6693	25.9612	27.5576	31.1653	32.7678	29.3298	29.0282	26.3951	28.5721
ACP5_1	ACP5		protein_coding	5.68113	4.8462	1.99873	1.88107	3.10264	3.78501	0.886947	0.910386	0.245022	0.605734	20.0856	15.7134	17.0732	12.3741	16.1924	15.4794	14.682	11.4793	7.52023	9.61735	17.6767	13.9189	8.06608	8.95075	11.5749
ACP6_1	ACP6		protein_coding	19.3266	15.2177	36.0584	35.2649	18.0262	18.8465	28.678	30.6319	19.6212	15.994	51.8606	44.9964	44.299	46.419	53.211	63.2267	50.4059	50.6662	58.3054	50.5157	57.4959	48.2223	53.9114	59.5286	47.5609
ACPP_1	ACPP		protein_coding	0.191255	0.037459	36.9765	52.2353	0.053062	0	7.64229	12.197	37.6062	40.4348	52.0416	52.4652	51.331	51.9075	54.5453	59.7213	56.8939	84.7712	68.8351	63.0409	71.1645	58.48	85.0238	74.4288	67.5463
ACSBG2_1	ACSBG2		protein_coding	13.1236	20.9617	4.52806	7.13125	9.21195	7.63182	10.1616	10.5062	16.5552	8.97299	84.5554	78.1138	117.597	66.9969	80.4202	50.9502	63.8154	101.322	106.873	48.6218	61.2459	49.2501	58.5652	53.9348	63.2984
ACSF2_1	ACSF2		protein_coding	26.1826	32.5553	15.4326	16.6699	23.9903	37.3213	17.2484	23.2248	6.29827	4.27433	32.722	36.2678	38.6118	32.5051	40.0692	30.3789	36.6574	35.7923	38.9794	38.8419	36.1162	36.748	28.5237	30.0805	34.4372
ACSF3_1	ACSF3		protein_coding	5.11014	4.95178	8.95808	9.36302	4.51748	8.18257	6.0128	7.21543	2.11226	2.6689	6.48111	5.39771	6.33679	5.53335	5.82419	6.11443	6.12843	5.74916	5.25834	6.3166	7.08248	6.11638	4.20628	5.62453	4.70517
ACSL1_1	ACSL1		protein_coding	27.4584	28.1488	30.7714	32.5675	23.8665	23.2787	35.7229	35.0189	30.3745	26.1476	582.434	783.412	656.45	868.637	678.553	575.914	640.628	489.842	540.589	368.027	304.88	325.193	334.595	376.994	328.137
ACSL3_1	ACSL3		protein_coding	29.7363	28.4532	80.9569	85.8512	25.6267	27.7631	50.5607	45.825	27.2633	28.4162	30.7715	34.599	29.6616	30.9986	32.338	30.384	33.6186	34.103	35.158	39.2262	38.9994	34.8955	41.0186	41.4726	37.4059
ACSL4_1	ACSL4		protein_coding	31.9609	30.2833	15.4138	21.2608	19.9328	19.5205	37.1065	22.4263	12.7687	11.1604	50.5102	42.206	55.1393	44.2487	49.411	38.404	54.1078	43.197	45.1923	45.656	52.0816	52.3699	37.6929	41.1448	34.901
ACSL5_1	ACSL5		protein_coding	0.608991	1.65674	2.23279	3.43834	0.549502	0.253307	0.733413	0.736298	3.26496	1.62095	63.0185	47.3794	59.8487	48.5396	53.5154	73.0833	53.0488	56.359	53.9581	39.8476	45.8833	40.8789	39.0611	49.9568	26.1023
ACSL6_1	ACSL6		protein_coding	0.810203	0.549957	1.10604	1.05219	0.404428	0.641179	1.87213	1.73186	0.596653	0.12476	35.9634	29.3844	25.4362	21.6786	23.9133	28.4881	22.0919	18.0519	24.7094	16.6296	8.93054	18.3387	13.014	15.1186	11.0814
ACSM5_1	ACSM5		protein_coding	4.92859	4.35869	0.093626	0.445212	0.132601	0.205904	0	0.042553	0.03474	0.019798	0.1927	0	0.253949	0.072301	0.077295	0.076054	0.148183	0	0.083789	0.073322	0.086756	0.145193	0.036094	0.278341	0.071646
ACSS1A_1	ACSS1A		protein_coding	17.0467	16.4863	0.199706	0.385465	17.2432	20.2257	0.55563	0.320331	2.99622	2.72246	33.835	29.1656	32.6213	35.3532	36.7738	32.027	36.803	27.4543	29.7171	27.1184	21.514	28.5474	19.4042	20.5124	21.1231
ACSS2_1	ACSS2		protein_coding	14.6089	16.0708	12.991	13.8693	18.2489	26.2829	15.7511	17.6283	2.30865	2.12264	81.2403	70.0017	80.4801	101.706	76.6639	85.8447	99.6698	73.9637	62.9048	69.7444	56.0133	80.5832	41.9463	52.5925	55.6767
ACSS3_1	ACSS3		protein_coding	1.54808	0.950838	10.0409	6.07332	16.9719	27.1563	2.49031	2.69519	1.73761	2.72266	18.3835	13.086	15.1608	21.1872	12.4683	13.1378	19.1002	13.5179	17.051	10.8758	11.4301	19.3407	12.0665	14.7269	12.8151
ACTA1_1	ACTA1		protein_coding	3.23482	5.24081	9.74342	17.2631	3.6848	7.5726	9.54162	14.7454	105.34	88.1332	1136.77	1140.05	1499.62	960.887	766.091	1464.6	1166.68	776.692	958.347	790.007	422.385	973.878	590.942	688.567	773.579
ACTA2_1	ACTA2		protein_coding	30.3463	39.9308	0.546407	1.12723	90.9022	109.22	0.357239	0.211518	65.5101	43.3121	461.58	514.522	573.142	465.384	574.893	548.795	645.711	543.368	469.073	425.333	316.456	343.18	320.593	346.995	512.125
ACTB_1	ACTB		protein_coding	9079.36	9870.37	3661.18	4039.56	5040.94	4768.12	4150.18	3647.62	3021.14	2790.09	4060.38	4295.87	4434.31	4619.73	4201.89	4362.04	4014.03	3544.6	3792.02	4418.21	4428.68	4141.57	3659.88	3680.76	3916.36
ACTC1_1	ACTC1		protein_coding	3.90515	0.324991	0.221404	0.165545	0	0	0.04254	0	3.54235	3.25857	1.08639	1.60088	65.9459	0.414213	0.955701	1.07793	0.955083	1.40032	0.682947	0.448517	0.46304	0.714657	0.459951	0.547557	0.735172
ACTG1_1	ACTG1		protein_coding	271.218	263.083	233.844	222.031	201.787	175.778	203.085	169.255	72.1019	69.69	286.737	309.968	350.248	309.443	231.553	319.162	272.821	229.59	241.012	246.691	185.612	255.156	179.489	201.335	240.039
ACTG2_1	ACTG2		protein_coding	2.81828	4.0876	0.093211	0.064649	6.91468	19.6172	0.090514	0.885216	107.982	65.5968	1849.86	2195.99	2402.2	1833.25	1453.54	2549.94	1920.55	1279.04	1546.83	1600.86	1114.16	1817.92	1238.51	1233.42	1549.14
ACTL6A_1	ACTL6A		protein_coding	87.9287	90.2002	105.054	109.366	78.902	57.446	122.283	83.0539	19.3939	21.3323	44.9783	56.7533	47.8667	55.437	49.7842	44.8384	53.3985	49.9187	52.8427	64.8791	65.3573	58.9328	63.4044	57.3314	52.2887
ACTN1_1	ACTN1		protein_coding	122.115	124.84	116.083	151.337	93.0201	116.478	137.717	130.893	67.3948	67.135	268.641	308.426	307.153	314.168	304.445	347.14	352.6	271.582	311.309	322.45	271.164	298.508	262.647	267.606	290.045
ACTN2_1	ACTN2		protein_coding	1.6057	0.532415	0.680918	0.909925	0.32879	1.25276	0.707716	2.51859	1.87564	0.346023	0.328644	0.870843	44.3727	0.535264	0.636955	1.56599	1.24419	1.31807	0.884061	0.97951	1.00839	0.777002	1.02689	0.975746	1.06426
ACTN4_1	ACTN4		protein_coding	183.61	184.829	155.855	174.118	141.059	169.147	170.549	222.378	137.398	159.614	198.052	200.45	190.147	184.237	183.126	209.949	198.124	179.184	203.458	199.656	181.358	184.58	170.669	169.63	179.846
ACTR10_1	ACTR10		protein_coding	107.213	91.2979	91.0946	71.079	99.5578	86.6342	76.1645	66.9216	30.6946	26.4418	94.7497	97.7526	89.8663	93.0076	105.431	95.4486	101.528	99.4144	91.3035	103.248	95.1363	98.6485	80.5337	91.2412	94.5601
ACTR10L_1	ACTR10L		protein_coding	4.94163	8.35709	4.78352	5.65117	7.82665	8.56721	5.92566	5.95547	2.3441	1.24013	10.5348	10.4214	16.4643	10.1761	6.14607	9.60536	11.3112	9.4755	10.2509	10.302	10.6739	10.2196	8.32005	10.3333	10.1929
ACTR1A_1	ACTR1A		protein_coding	189.34	211.349	175.72	186.576	198.405	192.864	166.082	137.338	125.555	109.418	142.269	115.913	125.911	128.616	121.605	122.281	130.452	145.913	134.414	141.028	125.891	143.195	118.006	125.066	116.353
ACTR2_1	ACTR2		protein_coding	368.466	333.659	240.76	252.626	261.786	224.068	278.402	218.051	131.249	123.491	178.448	187.459	181.308	197.3	191.97	178.584	211.622	196.809	186.177	212.962	229.175	181.057	193.657	184.584	206.931
ACTR3_1	ACTR3		protein_coding	200.157	196.215	181.251	176.02	185.124	169.782	203.906	144.524	103.743	101.694	250.854	287.922	250.509	244.099	250.646	248.262	259.092	270.536	249.649	241.24	283.146	229.852	242.324	239.759	229.242
ACTR3B_1	ACTR3B		protein_coding	13.2553	10.784	33.7144	37.3603	14.8377	13.2346	63.0375	45.0766	12.923	10.5965	21.8819	27.3077	26.5367	23.0326	22.6045	22.5974	28.6084	24.7299	29.6019	42.9857	45.6101	41.5206	47.2654	44.8416	41.168
ACTR5_1	ACTR5		protein_coding	11.8977	13.5562	17.7402	18.1129	12.4921	14.2647	17.7208	19.1314	5.18729	4.96239	11.5791	11.3201	11.9673	11.2508	11.9345	11.0026	13.1253	11.3216	13.2911	11.7227	11.9935	11.1371	11.4654	12.1907	9.08166
ACTR6_1	ACTR6		protein_coding	128.499	109.857	86.4799	73.7276	81.3549	58.5693	104.788	75.6609	35.1399	25.344	91.6063	120.891	95.5133	110.517	101.883	88.1905	100.561	111.795	115.793	116.231	119.387	109.518	118.434	123.962	103.727
ACVR1B_1	ACVR1B		protein_coding	14.8527	15.493	33.6018	20.1575	10.4194	17.7001	18.718	29.4465	9.93312	12.336	19.5378	24.2181	27.8691	15.4329	16.6367	20.7694	28.0872	30.9191	30.4055	18.5142	20.4786	29.0236	27.1322	28.2343	18.7808
ACVR1C_1	ACVR1C		protein_coding	0.174643	0.267864	0.320655	0.483075	0.246615	1.42625	0.106213	0.633801	0.285891	0.195921	8.06887	4.34463	6.13151	8.31757	5.06527	4.89556	12.8992	7.08174	4.47846	8.16808	7.30436	16.4967	1.9361	5.03671	5.7153
ACVR2A_1	ACVR2A		protein_coding	145.977	159.625	342.388	309.072	79.954	96.1898	235.468	262.091	43.7172	44.9157	75.9971	69.7107	76.6386	70.7597	77.8917	64.3561	79.578	87.01	84.3294	90.3983	97.8023	86.6882	81.7254	92.512	85.0803
ACVR2B_1	ACVR2B		protein_coding	22.2878	20.1214	45.4737	41.2257	25.9045	43.8225	29.4808	37.6645	1.72335	1.70711	0.860846	1.22493	1.40077	1.63812	2.00561	1.57468	3.77903	3.44342	2.93128	4.92038	4.73779	3.59778	3.34736	3.20566	3.37953
ACVRL1_1	ACVRL1		protein_coding	6.92153	7.03005	0.039497	0	8.93544	9.3071	0.192594	0.116507	4.87296	5.02375	32.9628	29.9056	32.031	30.3721	33.0978	34.4439	29.6968	31.7684	30.9967	29.0703	22.7598	25.8567	22.7327	25.4315	23.3129
ACY1_1	ACY1		protein_coding	20.8099	20.2596	22.6497	23.6522	27.9518	34.5784	28.8967	42.7719	10.2496	12.7252	34.4578	32.0666	33.1449	26.4144	30.1253	31.402	33.1471	34.3097	43.9676	42.3221	38.4983	39.6326	43.3183	34.5298	40.9421
ACYP1_1	ACYP1		protein_coding	12.6724	13.1929	21.875	20.2302	12.8283	17.3281	19.3101	23.7164	12.6076	9.61905	18.2026	19.263	16.2082	17.7543	20.6629	24.9611	18.5907	19.6793	21.4811	23.4567	24.2405	23.76	16.8227	23.4619	22.4857
ACYP2_1	ACYP2		protein_coding	8.17829	8.14943	11.1349	10.8484	8.37633	9.98394	9.78272	9.6427	3.00619	2.745	22.8327	25.0106	25.5922	20.7881	21.1661	20.0527	27.4504	19.0735	19.9507	21.2347	16.1989	22.0228	17.8814	19.614	19.7252
ADA_1	ADA		protein_coding	49.3194	30.1148	28.6057	27.2442	28.0396	28.5957	11.9991	19.0495	28.3311	21.6465	114.915	119.594	144.061	148.681	135.091	129.672	142.237	108.692	106.262	104.305	82.3578	102.41	78.9265	81.2879	109.396
ADAL_1	ADAL		protein_coding	12.9304	12.1244	9.25738	10.7632	12.5676	14.7494	8.93764	9.95914	4.15979	3.00402	13.5922	10.3717	13.4002	11.0225	14.0334	11.5197	15.9194	16.2721	15.5983	13.1442	13.6741	12.649	13.3913	12.0819	11.7374
ADAM10_1	ADAM10		protein_coding	109.394	111.347	61.0365	67.9552	81.7337	77.216	85.4945	78.667	48.0959	38.417	97.0274	97.6263	95.6949	95.4869	102.13	103.159	112.586	100.226	106.067	115.167	118.268	105.82	109.872	114.702	98.1899
ADAM12_1	ADAM12		protein_coding	46.6131	67.6273	2.79452	3.66276	42.418	53.1238	2.91823	3.51881	2.73002	1.94665	29.3418	30.6383	29.9833	22.4121	36.093	26.97	33.3302	27.6815	25.1475	19.2617	17.6214	18.8689	14.2899	16.5934	14.7247
ADAM17_1	ADAM17		protein_coding	43.4569	43.1014	69.1834	71.2157	46.8343	50.31	78.9105	74.3608	19.6573	19.5588	60.9123	58.464	60.9255	54.2041	59.3375	61.3763	61.8865	56.4406	61.4459	61.3064	60.116	60.0095	51.5157	59.271	52.6633
ADAM19_1	ADAM19		protein_coding	4.56913	2.16833	2.18431	0.845309	3.65616	3.24213	0.254437	0.463504	0.818221	0.397235	17.1921	12.5738	14.9371	9.83045	12.1748	16.009	16.8362	16.1931	11.4725	10.8094	9.80934	11.0007	5.99097	7.89873	10.0058
ADAM20_1	ADAM20		protein_coding	0.977268	1.18508	2.29251	2.90239	0.635902	2.03799	1.32461	4.13503	0.306375	0.532106	0.264776	0.187329	0.336848	0.165988	0.044456	0.170064	0.096591	0.366255	0.252419	0.190714	0.620471	0.47016	0.123777	0.426056	0.163968
ADAM22_1	ADAM22		protein_coding	33.4675	41.8389	0.609952	0.558479	77.5263	73.8764	1.12594	1.10786	1.48716	1.13982	7.44528	5.28475	6.56512	6.09044	4.36508	4.95642	6.0344	6.5828	4.66878	4.77529	4.85469	4.96722	3.85566	5.03089	3.65929
ADAM23_1	ADAM23		protein_coding	18.4224	14.8347	23.9788	24.4917	10.8466	20.5948	29.3357	71.6481	6.71178	7.05064	21.7859	18.7147	20.1854	13.6344	19.5157	14.0827	23.7785	28.9806	21.6733	24.315	15.9867	16.6619	19.7818	23.1944	22.3428
ADAM32L1_1	ADAM32L1		protein_coding	0.225691	0.341112	0	0.019357	1.07666	4.86054	0.04923	0.040296	0.136033	0.168043	1.81956	0.789789	0.980162	0.604504	0.757076	1.27356	1.00602	1.25177	1.82867	0.832112	0.479519	0.503413	0.660119	0.794403	0.177907
ADAM32L2_1	ADAM32L2		protein_coding	0.696921	0.891081	0	0.031057	2.994	7.78602	0.025315	0	0.240421	0.188221	7.1282	4.6171	4.26505	3.33021	4.79448	4.62797	3.30867	4.69764	5.85586	3.59417	2.67081	2.92727	3.41745	4.34242	2.59654
ADAM33_1	ADAM33		protein_coding	25.7003	28.4546	0.510944	0.759479	42.7743	66.9051	0.345898	0.486098	7.55191	6.86073	41.7781	42.472	44.0193	42.9783	35.0329	48.8287	36.7252	35.9935	32.6363	29.8748	30.2969	25.4878	20.377	21.2074	23.9794
ADAM8_1	ADAM8		protein_coding	1.00746	0.923742	0.044743	0.029327	0.549279	0.825552	0.138923	0.06485	0.139843	0.308297	3.83475	2.6576	2.53991	4.42843	4.54035	5.07519	3.6269	4.00375	3.28959	2.18518	4.15836	2.63543	2.64824	2.28565	2.59844
ADAM9_1	ADAM9		protein_coding	36.9999	38.7128	45.5033	49.2249	41.1583	45.5494	38.5945	29.7147	28.6251	32.8223	101.122	112.903	113.003	85.1384	104.763	112.918	113.405	90.0701	93.8297	73.7372	69.205	74.556	66.8063	85.5567	52.596
ADAM9L_1	ADAM9L		protein_coding	0.35037	0.333676	2.62049	2.58816	0.175508	0.365148	0.585989	1.99236	0.491244	0.398853	3.14646	2.30552	2.69295	3.91507	4.51673	4.95937	3.99293	4.41222	4.15555	3.55117	3.97113	4.46904	3.57197	3.5979	3.74312
ADAMDEC1_1	ADAMDEC1		protein_coding	1.36683	1.41429	0.037116	0.142576	1.64018	1.60234	0.025305	0.138422	0.528053	1.17504	3.8059	3.2329	2.26898	2.31775	2.49529	3.88306	1.85657	3.45748	2.51897	3.13882	4.44836	2.07756	1.87246	2.44821	2.51468
ADAMTS1_1	ADAMTS1		protein_coding	60.7258	51.4252	8.42496	10.1731	50.0082	86.7157	17.6063	17.0265	9.24404	8.24264	59.954	62.5459	60.5138	61.388	29.0391	63.7742	61.136	40.5646	48.0912	39.9181	37.1526	34.9148	38.6215	42.4787	42.9979
ADAMTS10_1	ADAMTS10		protein_coding	46.2798	36.9437	13.026	19.061	19.7589	35.6159	25.1381	34.1896	5.98989	4.68595	13.9557	9.84017	9.28199	10.249	15.3462	15.446	17.1043	17.0329	20.4144	18.5342	16.6359	14.6521	19.045	19.9817	19.2656
ADAMTS13_1	ADAMTS13		protein_coding	0.517315	0.420839	1.63292	1.9962	0.320814	2.37901	1.88223	5.19914	0.47469	0.532708	3.83984	2.88888	3.94907	3.31785	2.375	3.25931	2.3	2.44515	3.10717	3.06903	2.31806	4.45215	1.84443	3.01831	2.56756
ADAMTS14_1	ADAMTS14		protein_coding	8.7776	7.8156	5.86911	5.31541	21.127	42.5442	3.38623	3.99325	3.84364	3.84489	10.0367	10.2144	6.70523	10.7761	11.0082	11.148	11.3458	9.80891	11.5901	9.92034	10.1323	7.99479	8.10461	10.4958	8.58283
ADAMTS15_1	ADAMTS15		protein_coding	43.874	48.8575	0.118156	0.061699	30.2894	33.1437	0.075584	0.019131	2.95438	2.86178	118.762	118.013	114.691	150.841	134.561	131.353	134.488	82.7564	92.7848	71.5434	71.4722	67.174	54.4866	50.6762	72.3984
ADAMTS17_1	ADAMTS17		protein_coding	8.85997	4.19833	263.331	338.539	92.2421	203.966	154.477	182.753	12.6537	6.07548	5.48958	5.39022	4.4221	6.58698	7.19332	7.27891	10.9626	10.8698	14.5729	9.26545	16.7235	12.1545	12.6908	13.2387	16.2506
ADAMTS18_1	ADAMTS18		protein_coding	2.50999	0.707035	54.5822	57.6828	2.85054	4.403	23.6405	28.9099	8.94279	4.86941	1.29733	1.55182	1.59943	1.91649	2.34765	1.53638	3.55848	3.00735	4.09809	3.96663	4.54255	2.69063	3.86344	4.0435	3.54891
ADAMTS2_1	ADAMTS2		protein_coding	4.06568	9.61291	9.46438	10.5719	22.2082	32.4363	13.0424	13.8945	4.94811	4.52844	59.2158	53.8243	55.3981	46.093	53.6642	55.1795	60.3629	46.3794	47.2513	56.3549	50.2623	55.1445	30.5633	37.2012	52.9379
ADAMTS20_1	ADAMTS20		protein_coding	7.65329	7.35111	1.62276	3.61635	4.7504	4.45126	4.86571	5.18835	0.409133	0.725653	12.5442	7.49799	14.6893	6.60959	8.42148	10.2671	10.3568	9.68235	9.43515	8.19792	5.76394	8.73982	5.4683	6.99438	7.17325
ADAMTS3_1	ADAMTS3		protein_coding	26.5997	34.5191	52.686	48.5349	41.3494	45.8764	30.7283	39.1329	5.41573	5.28362	17.4718	15.9614	14.3098	17.1321	16.9568	13.1459	26.8213	22.0591	22.751	29.1992	29.0523	24.2703	25.551	25.0965	28.8577
ADAMTS4_1	ADAMTS4		protein_coding	0.267476	0.316244	0	0.031269	1.44914	3.13774	0.01666	0.381768	0.105448	0.115625	1.46763	1.72014	1.37604	1.75088	2.1349	3.13543	1.62493	1.06711	1.21487	1.82869	2.25084	1.34861	1.44814	1.87134	1.86105
ADAMTS5_1	ADAMTS5		protein_coding	5.98324	5.9184	11.8587	16.119	12.9254	7.36488	14.8667	14.0226	2.03357	2.76383	23.2171	21.4963	27.4679	17.9779	21.2096	20.1158	29.3283	24.7085	29.6599	31.806	28.3254	23.8763	25.9767	26.2354	27.1267
ADAMTS7_1	ADAMTS7		protein_coding	8.78913	7.51497	16.4244	12.031	31.9792	56.2885	24.6702	26.3604	5.26541	4.57676	15.4989	12.2934	14.6342	13.3512	15.7164	14.0874	18.3137	14.9862	16.2538	22.5932	15.6345	18.1367	13.3728	16.2581	16.1318
ADAMTS8_1	ADAMTS8		protein_coding	67.1757	71.7592	0.819793	1.60171	2.83594	5.32372	2.54793	2.2736	4.8258	3.49333	22.8084	23.1463	20.3285	23.5069	25.4664	27.4749	23.7251	16.5565	17.3341	12.5084	10.3576	14.4003	12.5312	12.198	15.8789
ADAMTS9_1	ADAMTS9		protein_coding	2.56157	2.34366	0.145577	0.171304	12.0877	21.4651	0.67347	0.680508	3.37299	2.58178	25.0108	28.6375	26.9181	36.7755	34.052	27.425	35.8753	39.4906	46.6184	42.5501	32.1239	29.6422	29.4832	31.279	32.652
ADAMTSL2_1	ADAMTSL2		protein_coding	4.48075	4.22459	2.4023	3.22504	1.4119	2.81179	5.73292	17.5367	1.97909	2.29851	13.1506	12.4044	10.4566	10.8796	16.6631	17.0528	22.0107	16.3345	20.3029	23.6463	18.0692	23.1081	26.0195	22.5452	27.4621
ADAMTSL2L_1	ADAMTSL2L		protein_coding	5.40629	5.78615	15.8383	16.551	4.49774	11.1743	5.392	11.3085	0.690087	0.617601	1.22151	1.66373	2.59099	1.48357	1.70958	1.518	1.5411	2.22625	1.87466	2.9338	1.70724	1.77955	1.32939	1.55542	1.8662
ADAMTSL3_1	ADAMTSL3		protein_coding	16.4019	13.6328	0.435241	1.33011	8.38762	13.4684	0.997088	2.84368	1.03086	0.726115	12.2728	15.3279	18.539	13.2296	16.0681	15.0672	14.8779	10.1987	11.9623	10.3168	9.88153	10.8565	7.9967	8.09326	9.44397
ADAMTSL5_1	ADAMTSL5		protein_coding	0.342167	0.07326	2.95837	4.48898	0.492082	1.09031	5.71691	12.1834	4.87771	4.68436	29.5264	28.5576	29.5085	26.9152	20.4975	31.369	18.6068	21.1907	19.6484	20.4783	16.5862	24.6583	21.8696	23.3705	19.9588
ADAP1_1	ADAP1		protein_coding	64.2856	51.5621	9.56437	21.2714	14.762	16.615	26.1975	13.834	4.45314	4.40096	13.9242	14.622	12.7533	15.5441	11.8972	17.2033	14.3053	11.4496	12.8497	9.52305	11.3235	9.14593	9.2249	10.5035	8.71602
ADAP1L_1	ADAP1L		protein_coding	1.28801	0.80452	34.4573	34.4647	0.415241	0.72831	20.9793	26.7161	9.03244	7.12457	9.54778	9.54654	9.88538	8.50777	8.11535	10.4133	9.82328	11.7308	10.8273	9.92153	11.2727	10.9769	11.777	12.0868	10.7957
ADAP2_1	ADAP2		protein_coding	1.9951	1.85974	0.370871	0.702246	1.58913	2.19232	0.404449	1.35123	0.518327	0.439087	4.9767	5.50459	4.24229	4.74417	4.65068	4.6074	4.06675	5.29204	3.58617	4.29319	9.21714	3.45198	3.32159	3.71564	3.80566
ADAR_1	ADAR		protein_coding	23.7781	21.7485	26.7139	29.841	22.6681	27.4442	33.503	40.8164	10.3262	11.7774	21.85	22.9452	21.9376	21.2947	22.3485	23.6585	22.3963	20.4505	23.8784	26.8628	28.1992	24.7062	24.6889	23.5918	25.2254
ADARB1_1	ADARB1		protein_coding	19.6473	16.5121	9.98547	10.8941	7.71891	13.1658	10.8606	17.8778	11.1769	9.14877	17.5696	21.8173	21.5547	16.6262	19.8436	23.3505	23.5154	20.7822	25.3424	26.1856	21.5083	19.8809	25.0097	23.8908	21.8595
ADAT1_1	ADAT1		protein_coding	22.8777	17.8136	19.3783	21.8008	16.9759	32.3115	16.8397	32.8954	12.1459	11.0788	22.2101	24.4287	23.0693	21.8176	25.4549	25.1076	25.5197	23.6053	27.4842	29.5777	19.9625	25.9458	33.9442	30.3381	24.2573
ADAT2_1	ADAT2		protein_coding	34.5814	32.9867	35.8961	39.0194	33.8962	27.6459	35.5094	34.2197	20.2538	19.8764	49.6288	51.4892	58.8861	47.9528	51.0445	54.0384	52.1354	54.9888	62.7884	55.6098	60.0596	58.1096	58.6879	54.8809	53.7353
ADCK1_1	ADCK1		protein_coding	3.97365	4.32771	7.0495	9.56912	3.74365	5.31458	9.79948	10.2012	5.23453	4.99852	7.92785	8.29578	6.88326	8.50792	7.30051	8.73073	8.07335	10.4777	9.00134	10.5362	10.1995	9.6831	11.0404	10.4823	8.86999
ADCK2_1	ADCK2		protein_coding	11.2704	11.0186	6.77193	7.22215	13.186	15.7444	10.2223	12.958	3.00439	2.86367	17.8124	15.553	18.342	16.5884	15.9587	14.1144	15.1485	17.87	17.8443	17.54	17.4554	18.224	16.6848	17.441	14.9182
ADCK5_1	ADCK5		protein_coding	6.35199	5.41507	9.23126	10.4744	6.88849	10.7375	10.3607	18.8927	2.25269	2.5087	3.98334	3.32666	4.25756	4.44286	3.92989	2.64377	3.81873	5.50618	6.19347	6.95408	5.49329	3.05839	4.88393	4.65058	4.15124
ADCY2_1	ADCY2		protein_coding	27.9304	19.952	2.41182	0.725247	11.4741	21.9417	6.11078	7.2034	1.41781	1.52761	3.79648	3.69825	3.45682	4.66425	3.99226	3.70819	7.82917	6.86585	9.05316	8.06989	6.90076	6.74113	6.45167	7.96958	7.09178
ADCY3_1	ADCY3		protein_coding	2.36031	1.78665	1.7387	2.22723	3.61926	9.22246	1.90243	2.59345	1.49304	1.94483	11.855	10.8518	13.0787	9.65054	8.46178	13.1845	9.99869	8.89613	9.05643	7.69097	5.50658	8.31717	5.77751	6.16817	10.4623
ADCY6_1	ADCY6		protein_coding	17.4474	25.1701	16.661	15.2333	73.1598	86.6325	32.0841	25.3295	6.76282	7.04347	10.0317	11.4031	11.0142	12.677	14.3262	10.7788	13.8342	10.8445	12.6595	13.2152	10.2187	11.5663	8.64784	10.6844	10.0662
ADCY7_1	ADCY7		protein_coding	1.44448	0.905871	4.15191	5.8898	1.03711	0.852284	13.1879	13.8106	19.8092	11.6275	11.0365	12.7797	12.6777	12.3322	11.4057	11.7976	16.1213	16.2413	18.0411	22.342	30.6194	18.1372	29.3791	27.13	22.6607
ADCY8_1	ADCY8		protein_coding	7.7334	3.1744	0	0.020518	2.93111	3.86085	0.205104	0.36569	0.299999	0.29524	0.275008	0.410164	0.097479	0.175597	0.455875	0.211516	0.792166	0.566495	0.862137	1.35269	1.05663	0.800144	1.12449	0.782822	0.748318
ADCY9_1	ADCY9		protein_coding	50.824	48.7917	22.7899	24.343	59.6934	83.9907	26.2647	30.6764	12.1175	11.0705	59.7212	63.524	60.7043	57.9961	59.1746	63.2686	59.7527	53.1616	58.0908	45.882	38.7148	43.0068	38.0621	44.5632	42.8971
ADCYAP1_1	ADCYAP1		protein_coding	0.139888	0.076497	0	0.246967	0.139287	0.061198	3.19762	3.19399	35.2825	11.2915	11.0222	8.37818	8.81348	4.72749	6.11066	10.5892	3.24029	5.04208	7.28316	4.66454	7.4288	10.8778	10.9024	5.98248	9.0377
ADCYAP1R1_1	ADCYAP1R1		protein_coding	3.4487	2.28775	0.778412	0.447364	1.44625	1.61022	1.45456	2.38766	0.238069	0.46372	3.70146	3.39443	4.54556	3.00502	4.99159	3.5572	6.62545	4.9443	4.95288	4.34752	5.28031	6.2838	5.02336	5.35234	4.42409
ADD1_1	ADD1		protein_coding	186.048	170.16	233.682	230.426	204.033	183.881	187.156	144.881	55.742	45.2173	151.33	143.066	159.185	137.105	148.72	134.66	147.835	142.552	138.891	145.3	130.435	128.991	106.346	109.882	117.878
ADD2_1	ADD2		protein_coding	2.30772	2.37974	1.73417	2.15553	3.12079	7.44902	1.97783	7.90501	0.651245	0.783194	3.07948	2.69668	3.81664	2.27859	1.94089	2.57702	1.38302	1.29128	3.28946	2.1917	1.53163	2.26861	2.6868	1.75756	1.6586
ADD3_1	ADD3		protein_coding	133.731	107.044	81.3341	100.599	136.864	129.896	98.9562	94.2191	78.5305	104.452	191.902	181.743	219.366	175.595	205.268	177.532	171.401	162.47	145.279	139.864	138.686	133.344	106.498	119.584	127.724
ADGB_1	ADGB		protein_coding	6.21323	1.15928	1.77562	1.69881	0.425877	0.372105	1.17386	3.37405	0.753246	0.453483	0.694326	0.692284	0.46593	0.230103	0.670445	0.426424	0.55939	0.821622	0.659028	1.41909	1.69211	1.41841	1.40738	1.54527	1.38891
ADGRA1_1	ADGRA1		protein_coding	1.25822	1.21513	4.7164	4.94691	2.20372	1.42194	0.34174	0.281625	0.435702	0.363787	6.87048	7.09388	7.8919	6.42661	7.36055	8.28602	9.12858	7.29141	7.00218	5.4325	4.27772	8.46036	3.51579	7.1861	5.12544
ADGRA2_1	ADGRA2		protein_coding	31.4286	32.6663	0.517465	0.548368	28.4062	42.8404	0.435391	0.849914	3.68719	3.2928	49.1177	47.9015	52.3867	41.7841	48.8152	51.3146	41.1138	41.3088	40.8801	37.0524	30.9115	36.0044	24.3205	29.7933	27.0415
ADGRA3_1	ADGRA3		protein_coding	46.6188	44.6733	42.1545	46.3071	40.2856	45.1276	44.0498	41.8898	12.0027	10.9174	12.5883	11.9197	12.9285	11.7541	14.1826	13.8503	16.7188	13.8506	14.428	19.4943	15.9553	16.4197	17.0684	19.686	15.187
ADGRB1_1	ADGRB1		protein_coding	2.24201	1.01673	2.59104	3.21662	1.65907	2.43637	0.605431	1.0318	0.167211	0.06074	0.712607	1.03401	0.707397	0.881958	1.26015	1.15904	1.2845	0.816696	0.925801	1.20425	0.594608	0.851254	0.658564	0.652252	0.771188
ADGRB2_1	ADGRB2		protein_coding	1.6444	2.80828	0.419074	0.720708	5.75049	11.8415	0.530912	1.53581	0.306522	0.272396	0.797443	1.16917	1.12813	1.0212	1.01856	1.07098	1.02053	1.00968	1.07807	1.24944	0.761796	1.14137	1.05325	1.03988	1.11115
ADGRB3_1	ADGRB3		protein_coding	3.62512	2.8746	1.52982	1.93823	2.65351	2.71126	1.76666	5.01579	0.110987	0.041992	1.0448	0.589084	0.46613	0.23746	0.532038	0.418652	0.496759	0.52061	0.718464	0.611641	0.236591	0.57656	0.283078	0.261705	0.410407
ADGRD1_1	ADGRD1		protein_coding	2.32589	3.29102	0.076277	0.015591	64.494	79.4575	1.02142	0.736728	4.21965	2.28861	27.0457	29.0016	35.8019	22.7933	29.6865	26.8959	10.9823	9.69245	19.8388	20.3674	14.8622	20.2184	10.1702	16.2543	13.6886
ADGRF4_1	ADGRF4		protein_coding	0.665177	0.642884	1.16633	0.989636	0.459763	2.54295	1.12157	3.1163	1.55456	0.854822	18.188	18.1323	16.8076	16.8064	13.42	24.8811	16.969	21.1266	17.2013	10.8824	16.5679	10.9686	14.9836	15.7824	14.3266
ADGRF5_1	ADGRF5		protein_coding	2.838	3.92289	0	0	3.959	3.59287	0.016916	0.028302	0.401751	0.729215	4.14629	3.51299	5.28307	5.02977	4.3516	5.19596	10.0528	4.70614	5.30283	6.74239	4.4082	7.39532	3.26714	5.04143	6.76372
ADGRG1_1	ADGRG1		protein_coding	6.02376	2.93955	141.852	143.778	3.71094	3.9561	202.645	267.484	18.6993	23.5477	24.8968	25.747	25.5495	29.9961	29.2236	33.115	37.0026	35.326	41.1463	61.5818	53.8018	55.3578	52.8085	53.6284	49.874
ADGRG2_1	ADGRG2		protein_coding	3.21063	2.25624	2.41228	4.41765	9.62291	14.7881	13.8076	10.2975	0.749424	0.429494	11.6147	11.132	8.9218	14.0657	11.6804	9.74094	12.8515	10.2987	8.90637	4.30556	4.42052	4.43721	4.80624	5.92974	5.93281
ADGRG3_1	ADGRG3		protein_coding	0.0007	0	0.25231	0.496741	0.023479	0.024061	0.274461	1.36204	0.171431	0.130273	1.89588	3.00566	1.27899	0.873719	1.67636	1.73094	1.42395	1.1925	0.542856	1.46388	1.3568	1.2519	0.863565	1.00827	0.874696
ADGRG6_1	ADGRG6		protein_coding	30.562	29.1716	9.31397	12.7634	24.565	22.2462	35.8755	52.3454	22.3516	25.6186	9.41968	7.91378	8.07389	6.74796	7.84996	8.24189	10.7482	9.4018	10.7378	13.2118	15.6478	9.97002	12.3368	14.2707	11.9635
ADGRL2_1	ADGRL2		protein_coding	87.8358	83.9139	33.2518	36.8394	97.1873	124.056	40.5245	54.3491	31.5909	27.2688	24.7588	26.5236	24.276	24.0996	29.7988	29.2524	30.3353	28.0715	30.0274	41.3819	38.6529	30.0961	30.6274	37.1242	37.7343
ADGRL3_1	ADGRL3		protein_coding	70.3572	66.6302	76.8174	90.7034	63.8472	80.6253	41.9938	42.623	13.8982	10.141	17.2206	14.8425	18.0374	14.0118	15.8259	15.935	15.7465	11.6629	14.166	13.6974	9.92235	13.4558	7.8799	9.42363	10.0249
ADGRL4_1	ADGRL4		protein_coding	8.0372	8.35355	0.015113	0.033779	11.3316	7.59596	0.213155	0.07053	1.98379	2.50252	49.5568	47.9233	52.0337	50.1837	59.3094	59.8883	67.0368	51.4013	55.2453	52.6535	37.6573	54.2511	35.854	45.5758	41.5829
ADH1C_1	ADH1C		protein_coding	2.60686	0.859544	0.717667	0.729552	0.02594	0.104144	5.18883	3.91224	2.48505	0.40542	11.3737	9.76833	20.2371	9.78369	6.05553	6.07461	7.71532	6.92898	7.72536	5.15768	4.50737	7.17056	2.7976	3.75536	2.46355
ADH4_1	ADH4		protein_coding	339.937	349.602	309.609	268.301	308.399	268.395	312.695	244.817	61.8609	71.0412	193.588	183.177	200.423	188.634	184.051	182.681	200.906	205.28	188.075	218.385	222.774	207.332	189.204	186.49	177.688
ADH6_1	ADH6		protein_coding	0.048399	0	0.044194	0	0	0	0.051916	0.081604	1.89277	2.60206	15.7418	4.14062	14.7303	2.67978	1.87088	7.83036	11.8272	2.09766	13.126	1.22146	1.56575	3.12086	1.196	1.99929	1.40361
ADHFE1_1	ADHFE1		protein_coding	0.682253	0.820841	0.382766	2.21196	1.9096	3.18011	2.16765	4.90169	2.13066	0.714292	6.92452	6.11302	8.55908	7.6004	5.74946	5.5094	5.77215	5.95599	6.1264	5.31565	3.10266	5.39325	7.17426	4.82266	11.1928
ADI1_1	ADI1		protein_coding	99.6501	105.635	32.7882	37.3698	71.5417	65.0278	43.7352	32.5317	22.4141	20.1908	69.2308	67.5601	73.8763	68.5231	67.8533	62.1713	78.1123	65.789	69.8751	77.7463	78.5705	69.1095	65.9298	71.551	68.6373
ADIPOQ_1	ADIPOQ		protein_coding	0.244143	0.145268	0	0	1.66824	2.44604	0.067392	0	4.6863	4.17512	399.534	414.891	443.609	365.449	375.772	452.36	351.706	303.385	361.734	319.682	193.034	278.965	173.284	235.736	316.712
ADIPOR1_1	ADIPOR1		protein_coding	38.0954	36.3902	34.0923	33.7879	29.4089	33.9266	34.4037	38.2766	26.9969	25.7901	68.6586	67.1966	61.2697	71.2169	69.7864	78.6923	73.6593	63.5338	66.7514	65.2845	62.7894	62.2373	60.4838	57.8305	66.7769
ADIPOR2_1	ADIPOR2		protein_coding	60.9423	59.9899	58.0082	66.0389	54.9515	62.5191	82.7802	70.5449	42.5404	46.3321	99.3191	100.592	112.042	111.794	121.106	104.912	116.787	123.151	122.74	119.143	112.267	106.6	108.854	106.156	112.228
ADK_1	ADK		protein_coding	111.929	106.383	52.3171	51.4718	89.9157	70.9543	85.2506	70.4161	114.836	96.2825	67.4308	64.3045	71.8176	64.0072	59.8835	52.2577	88.2849	71.5032	97.8799	102.322	134.731	75.7638	131.203	98.6932	103.823
ADM_1	ADM		protein_coding	4.11413	3.20286	2.39387	3.50839	6.30274	3.72864	1.54198	1.16291	4.18798	5.0869	60.5995	54.5802	69.1117	47.1565	56.8146	50.6039	54.2312	57.6285	39.0579	45.2107	44.2283	42.3433	24.3797	27.9784	49.1116
ADM2_1	ADM2		protein_coding	0.098136	0	0	0.083357	0.149776	0	0.335207	0.086225	4.60386	25.9644	0.491165	0.860866	0.863705	0.817495	1.8141	2.17018	5.31996	0.989757	2.24348	1.4512	1.68012	2.17051	1.80705	0.962788	2.37125
ADO_1	ADO		protein_coding	40.9901	43.9244	26.9195	33.3816	44.6895	44.8618	39.6604	33.2259	13.446	11.6925	41.0506	46.3254	39.2342	44.9007	43.2941	46.2422	39.7837	37.9192	40.137	42.12	37.649	40.7857	36.9456	39.2343	37.1411
ADORA1_1	ADORA1		protein_coding	1.80843	0.524573	0	0	1.38564	0.550038	0	0.374225	3.94733	3.3839	16.6608	22.2919	18.0145	38.154	26.4191	25.7369	22.6997	18.3351	20.9856	13.9748	14.3576	17.8849	10.3423	14.2485	10.5627
ADORA2A_1	ADORA2A		protein_coding	15.7207	15.6375	3.06003	2.2239	15.3625	16.0116	1.94388	3.90517	1.91546	1.93909	5.74963	5.42917	6.24211	6.26901	7.24425	7.39514	6.71261	6.68242	6.51424	6.32785	5.88604	5.4072	4.65275	5.66863	5.5807
ADORA2B_1	ADORA2B		protein_coding	1.93766	1.79797	0.095515	0	1.65519	2.62194	0.125115	1.64781	1.50354	1.2955	8.5147	9.57062	7.59387	11.2914	8.7431	11.1155	9.01483	7.99023	8.04935	7.26124	6.89739	6.24797	6.87887	6.12823	8.19363
ADPGK_1	ADPGK		protein_coding	57.4978	53.1236	25.6579	32.2303	56.5696	58.1591	49.9505	43.0487	24.3592	22.1551	50.6037	52.8341	51.0209	48.6925	52.1996	50.918	51.9406	52.9573	57.6769	55.9221	55.5868	54.4544	56.3457	51.8794	49.6141
ADPRH_1	ADPRH		protein_coding	16.7339	20.4934	20.9629	26.4856	25.1222	38.3345	20.8658	24.7967	16.4877	16.1288	87.7493	80.2425	84.8642	85.1242	81.3971	31.8767	68.5791	25.2058	85.007	64.8722	60.2578	75.6445	50.738	63.6924	62.525
ADPRHL_1	ADPRHL		protein_coding	2.97372	3.11122	4.48025	4.79852	4.29804	9.47126	3.15404	8.5338	2.33627	1.89555	6.71943	7.02421	7.26917	8.11792	7.53223	8.65429	6.3329	5.74785	5.15129	6.22686	3.3534	6.91284	5.15015	5.01067	6.80732
ADPRHL1_1	ADPRHL1		protein_coding	0	0	0	0.120796	0	0.095934	0.067322	0.172046	0.281552	0.020338	0	0.253115	7.52932	0.167746	0.194472	0	0.133011	0.406035	0.428876	0.548797	0.104146	0	0.170091	0.462141	0.539926
ADPRHL2_1	ADPRHL2		protein_coding	56.8537	53.2997	44.298	44.0602	61.2151	56.6719	49.1152	43.2529	18.6439	14.8609	44.7872	46.9542	45.8757	43.8063	46.9479	44.9857	38.4497	41.9424	45.8066	47.2906	44.9473	47.4648	44.1324	48.3224	38.9692
ADPRM_1	ADPRM		protein_coding	9.43474	10.9018	8.3241	10.019	10.3844	14.1269	9.22037	10.6479	5.18029	3.78264	15.5323	13.5273	16.2585	13.4	13.707	14.367	13.6474	16.8477	17.2826	14.7501	15.095	13.8711	12.9121	15.9223	12.8839
ADRA1A_1	ADRA1A		protein_coding	0.113865	0.226439	0	0.008669	2.93928	5.12992	0.032937	0.023695	3.98074	4.28242	6.98491	6.90045	8.36102	7.70758	6.5595	7.40367	8.13171	5.93468	6.79005	6.39996	4.17923	6.14294	4.26687	5.66522	5.2275
ADRA1B_1	ADRA1B		protein_coding	0.066578	0	0.081105	0	0.131283	0.450679	0.03433	0	0.090501	0.160464	2.56313	2.89737	3.53123	2.91567	3.26836	3.74757	5.27166	2.45236	2.02115	1.49291	0.87222	1.92504	0.975661	1.56326	2.1024
ADRA1D_1	ADRA1D		protein_coding	1.11453	2.2892	0.039855	0.038769	1.07931	1.35688	0.044601	0.018345	0.513179	0.590679	2.6046	2.40586	2.15084	2.89967	3.43019	3.81945	3.19423	3.66301	2.15601	3.04745	2.2891	2.68659	1.43725	1.59154	2.00042
ADRA2A_1	ADRA2A		protein_coding	1.31448	2.04513	0.477841	0.222434	6.96778	10.4524	1.24442	1.28511	2.41686	1.97693	12.6316	12.8188	9.76743	10.1816	12.4617	14.2557	11.588	9.55979	9.11679	7.74999	7.41443	8.41275	5.53647	6.91519	11.2666
ADRA2B_1	ADRA2B		protein_coding	2.47535	1.601	2.93415	3.3092	3.2948	7.04284	2.04035	4.9091	1.53983	1.64769	12.0382	9.99679	10.6442	9.45552	10.475	12.0755	9.01166	8.73127	9.13445	11.0592	6.35167	11.948	6.98714	7.68829	10.173
ADRA2C_1	ADRA2C		protein_coding	1.21975	0.753884	3.51711	1.46347	3.07646	2.31699	4.66712	3.10103	0.381723	0.109597	1.07033	1.09591	1.39272	1.13292	1.27698	1.52729	1.32318	0.981118	1.32574	0.557105	0.159044	0.530007	0.550564	0.980447	0.875599
ADRB1_1	ADRB1		protein_coding	0.970295	0.515695	0.407605	0.324918	0.720046	0.798418	0.600574	0.278897	0.317455	0.379867	4.92775	2.8632	2.87158	3.88254	2.49125	4.34594	2.48941	2.60162	3.09603	3.4723	1.81504	2.38131	2.56347	3.02724	2.24458
ADRB2_1	ADRB2		protein_coding	0.526711	0.748797	0	0.028667	3.082	3.36773	0.468846	0.581773	4.41911	3.38803	7.60385	8.0872	7.3309	6.96935	7.33793	7.99287	7.37896	5.11838	5.81178	4.7069	5.15914	5.1284	3.35098	5.4884	4.9109
ADRM1_1	ADRM1		protein_coding	103.706	105.355	113.731	127.535	85.0564	83.1932	107.409	106.188	50.8592	50.8576	115.878	133.948	124.489	139.417	130.517	136.586	122.679	123.891	125.024	139.202	140.768	128.772	137.088	132.617	123.163
ADSL_1	ADSL		protein_coding	100.331	120.825	82.7078	105.092	125.79	126.535	138.257	103.892	66.5128	55.4611	112.217	86.1484	100.894	138.55	115.208	110.883	89.1205	103.102	98.0364	108.624	105.624	99.4957	81.7986	84.4161	94.3318
ADSS1_1	ADSS1		protein_coding	57.2647	43.9691	10.9168	10.2155	46.7314	36.991	16.8065	11.7322	4.6033	3.57509	36.4635	35.0938	34.6626	35.5296	44.0296	57.6792	37.8175	46.6373	46.255	30.9772	32.9528	28.0498	28.8647	25.7546	40.9197
ADSS2_1	ADSS2		protein_coding	114.968	99.2709	96.0769	105.079	63.2441	53.8379	132.102	88.0453	11.8171	11.7072	72.8829	85.3723	76.2687	75.9304	68.7764	66.7348	81.4823	77.2882	72.2283	72.6756	86.1912	72.7534	67.598	75.0138	65.811
ADTRP_1	ADTRP		protein_coding	0.216659	0.181576	0	0.153167	0.426763	0.425178	0	0	0.032304	0	4.68811	2.18135	3.14988	3.24462	1.94616	4.54835	1.45658	2.9575	1.19065	0.977379	0.966825	1.55172	0.472624	1.54316	2.21139
AEBP1_1	AEBP1		protein_coding	90.3097	96.8548	12.1209	14.8796	48.8496	81.3121	26.7183	35.9247	17.9944	18.8347	182.628	171.258	205.732	126.847	198.17	154.278	193.31	163.987	198.485	168.954	171.477	160.275	123.842	103.07	148.826
AEN_1	AEN		protein_coding	3.68514	2.92384	10.5119	9.47358	3.86532	3.69625	9.28476	13.0835	7.25436	5.20584	9.6105	12.697	10.476	12.0231	9.39618	14.7539	8.09962	7.18197	10.0547	9.99548	10.5161	10.9606	12.1111	13.045	9.80257
AES_1	AES		protein_coding	281.627	275.921	136.759	145.769	155.985	162.358	127.926	110.582	56.4425	49.7154	179.285	172.14	173.6	157.386	177.991	189.325	172.706	158.125	169.639	172.639	155.072	165.876	135.875	150.023	152.835
AFAP1_1	AFAP1		protein_coding	37.8473	40.7886	25.6564	32.5917	59.1395	66.9269	42.3425	44.38	16.3783	16.1013	44.7913	47.7647	48.1492	42.6492	46.8166	47.4693	52.7812	46.4546	42.8995	43.5459	34.6365	35.9415	32.8373	35.4672	34.6576
AFAP1L1_1	AFAP1L1		protein_coding	10.7516	11.8414	4.13751	3.02153	17.0247	15.4835	40.2062	34.9987	12.4671	6.71506	14.9583	14.7305	13.2125	13.1239	17.1968	19.1471	14.4617	14.6486	18.4284	17.5448	18.8528	16.1778	15.9963	15.4299	16.7015
AFAP1L2_1	AFAP1L2		protein_coding	64.1309	61.2962	5.11128	7.34175	143.378	120.583	10.6928	8.30553	9.12048	8.67663	48.4126	48.2906	49.8666	42.7577	53.3615	56.6217	34.9844	41.9302	51.2134	38.5864	38.003	41.8858	33.0945	33.9319	32.4455
AFDN_1	AFDN		protein_coding	52.9989	60.1566	183.04	202.809	37.5268	52.1401	107.934	187.593	73.0956	58.1038	84.6773	80.0825	82.5849	75.5773	81.8098	90.6131	88.5677	90.1083	91.9653	83.6989	87.386	77.0656	83.8274	89.546	74.4895
AFF3_1	AFF3		protein_coding	22.4904	12.6585	1.1846	0.377873	6.36409	11.2613	0.782433	0.490706	0.713333	0.905772	0.377047	0.456986	0.392366	0.78248	0.685751	0.370581	1.2644	1.3249	1.83829	3.97151	4.10344	3.03115	2.42693	2.72411	2.90463
AFG1L_1	AFG1L		protein_coding	5.57035	5.61796	2.3618	6.52916	4.33259	6.95786	6.05277	6.7605	3.0154	2.48362	8.1616	6.78314	8.39909	7.07378	8.14112	9.9117	8.76834	8.88799	8.68176	8.00959	8.32431	7.2725	7.67507	10.5717	8.96384
AFG3L2_1	AFG3L2		protein_coding	54.8816	54.2443	71.3043	74.5085	53.6117	57.16	70.7668	63.6904	35.4407	35.6868	46.8203	53.6164	48.6913	52.4732	51.8159	48.9785	54.8607	53.8457	52.0893	56.1064	60.1142	58.1437	61.8088	58.9907	55.9591
AFMID_1	AFMID		protein_coding	11.6816	11.3945	11.7805	14.2799	8.09382	15.5667	11.4655	29.4189	6.84801	6.18019	26.9574	26.5678	29.4387	30.2481	28.7427	33.4731	30.9985	28.0787	30.9718	32.4959	29.0344	31.4967	29.9719	28.8626	29.9488
AFP_1	AFP		protein_coding	0.12499	0	1.02557	0.839798	0	0.134903	1.52464	1.34775	1.56225	0.780572	11.8282	8.43591	11.6742	6.3712	4.72323	5.69841	4.81055	7.36718	5.90799	4.46931	3.76456	5.88648	4.02817	7.44775	4.06898
AFTPH_1	AFTPH		protein_coding	18.2928	16.4267	32.5409	36.6832	17.6987	23.0626	34.9785	34.0374	15.2176	15.2867	35.3023	36.7688	36.1187	30.5811	34.1215	34.9133	33.2653	36.172	37.4773	36.8333	40.7187	38.7857	40.4835	41.6527	36.4868
AGA_1	AGA		protein_coding	31.0668	27.7778	26.8453	30.7998	27.7981	29.6167	35.0505	27.8857	7.58325	7.5427	58.574	42.565	63.49	50.1545	54.1743	42.5435	48.3427	60.041	42.2931	53.9268	63.9748	52.312	40.1864	69.9631	31.2914
AGAP1_1	AGAP1		protein_coding	24.2259	24.5639	34.4717	39.1044	26.019	31.06	26.8573	33.7298	4.72449	4.35989	20.1287	21.6129	19.5405	22.6757	18.1408	24.7983	20.9309	24.4556	20.4307	19.2901	19.1769	17.3069	14.9765	20.4209	18.5921
AGAP3_1	AGAP3		protein_coding	26.6086	24.2357	38.9937	42.627	25.4087	38.4008	48.3008	82.8556	21.8407	26.6641	43.0073	47.7359	38.1561	43.826	45.3774	59.7469	41.3346	41.3304	50.1831	55.5093	52.3729	52.4971	59.7069	55.2156	50.4062
AGBL1_1	AGBL1		protein_coding	0.145984	0.128331	0.358947	0.351261	0.375173	0.531124	1.97024	3.09129	6.35102	4.71694	3.78046	4.88862	6.70341	4.80866	2.47805	4.69392	2.10732	3.79958	2.52509	4.44884	9.36707	5.07888	5.29471	6.63918	5.46307
AGBL2_1	AGBL2		protein_coding	0.260359	0.758091	0.38217	2.53647	0.11705	3.34341	0.183924	3.15843	0.198354	0.102427	0.524404	0.215788	0.255805	0.392282	0.511351	0.108924	0.535704	0.375183	0.691549	0.784982	0.398706	0.252142	1.03921	0.736374	0.236057
AGBL5_1	AGBL5		protein_coding	9.08589	8.51115	9.64151	11.0604	6.80833	11.0249	9.3798	17.6956	2.46604	3.19069	7.79701	7.68238	6.02046	6.9384	9.34849	9.27859	8.00945	6.79817	7.78054	9.47054	7.15868	7.43418	9.92058	8.07763	7.45797
AGFG1_1	AGFG1		protein_coding	33.751	33.7545	33.4532	35.9402	31.8975	35.0776	33.9552	36.289	15.4107	14.9169	53.1937	57.6453	60.6593	56.7165	59.5621	55.385	61.6744	59.911	57.0477	51.4572	59.4996	52.5742	47.7144	52.5254	52.779
AGK_1	AGK		protein_coding	31.8217	27.9496	25.5132	21.7312	28.6773	23.4264	30.7119	21.8477	7.61462	6.45114	28.5547	24.1023	31.3217	32.0873	27.074	27.6503	25.1895	27.6466	25.7708	29.5704	29.8215	29.6229	26.5856	23.8621	30.3715
AGL_1	AGL		protein_coding	28.9352	28.0613	30.2941	33.8902	28.6866	46.361	47.8313	42.5656	8.52656	5.19826	51.0896	54.3488	51.7485	45.407	53.0555	46.0991	55.9464	48.2025	46.471	41.6818	31.8064	45.302	35.3277	36.6944	38.7787
AGO1_1	AGO1		protein_coding	85.1128	86.5161	96.7285	95.4639	66.1349	70.5005	75.1994	68.4401	19.3098	17.4092	21.583	24.8571	22.0845	21.9545	25.4331	23.026	21.777	22.4476	23.4373	29.9922	27.4904	26.0394	25.6645	27.9205	24.809
AGO2_1	AGO2		protein_coding	16.4433	18.5307	21.7723	19.3039	23.8745	33.1494	39.1561	49.9266	12.9927	12.2156	13.4694	14.8411	16.4513	13.1774	12.9809	11.9982	16.5042	12.9624	14.3779	13.1606	9.83656	8.97846	15.2454	17.2635	10.8391
AGO3_1	AGO3		protein_coding	38.1194	32.8643	35.1136	36.6368	24.0052	35.8874	40.895	49.2981	18.3615	15.5192	23.5599	32.2001	24.6125	28.772	27.2047	26.2362	30.2521	27.3779	28.098	27.7627	26.5938	20.4083	31.5689	33.4163	27.2045
AGO4_1	AGO4		protein_coding	54.0575	52.3735	211.213	208.409	50.8927	66.714	117.582	121.908	37.8421	37.7589	46.5347	53.2478	53.8672	51.6166	52.1865	56.4493	51.807	49.4409	56.9628	61.6204	61.4986	55.4727	65.6935	64.147	60.0625
AGPAT1_1	AGPAT1		protein_coding	0.141873	0.115862	0.176303	0.049412	0.00928	0.255182	1.20443	9.34322	123.34	120.035	133.635	105.349	98.7713	84.9176	132.694	124.19	129.721	104.025	98.248	82.7243	94.4064	112.927	88.4743	122.801	82.8841
AGPAT2_1	AGPAT2		protein_coding	7.30444	8.08745	4.64301	7.30114	24.9455	25.7221	8.05138	8.6947	13.5266	12.8303	61.4218	54.0806	54.7718	63.8287	63.9669	75.551	42.2736	61.9962	54.6128	44.0214	39.0114	48.6871	39.2699	43.6135	37.7157
AGPAT3_1	AGPAT3		protein_coding	27.2845	25.9722	13.1075	9.94776	25.5295	21.3935	19.3355	14.3858	5.77145	4.27912	37.2756	38.9942	37.8613	36.6546	36.5247	32.6317	38.4233	40.9024	39.436	37.1825	37.2177	34.8727	33.5477	38.7786	34.5742
AGPAT4_1	AGPAT4		protein_coding	25.1516	24.872	44.5759	42.9567	12.7146	11.4742	27.0322	22.5028	1.73829	1.72126	10.0865	9.56833	9.44867	11.2432	12.2355	10.2551	10.742	9.10716	9.80158	12.4246	9.54663	11.0599	8.54906	10.5957	8.92287
AGPAT5_1	AGPAT5		protein_coding	12.7338	10.9548	15.9666	19.5199	19.152	17.0329	23.6139	18.5694	43.241	43.7822	27.219	28.6769	26.3565	26.7147	26.8095	27.009	30.4545	27.2851	31.1852	48.1832	56.0598	49.3148	59.5117	53.3708	52.9591
AGPS_1	AGPS		protein_coding	38.3805	38.8388	24.5254	26.5782	44.4741	38.9916	34.2422	30.6216	7.94695	6.96606	32.9561	32.8395	34.9087	31.788	33.5646	30.4983	35.1589	36.3795	34.0065	34.9357	35.0841	30.1019	30.5466	32.1273	29.0949
AGR2_1	AGR2		protein_coding	2.65553	0.654545	78.6152	90.4847	0.205727	0.112222	43.9385	31.5416	1.83652	7.19492	0.86946	0	0.522266	0	0	0.49294	0.139547	0.256697	0	0.783578	2.49357	1.89503	1.86164	1.03179	0.716084
AGRN_1	AGRN		protein_coding	51.0754	58.3658	110.325	116.692	59.2345	84.3261	79.7601	75.693	17.7335	18.2976	41.0954	34.916	40.1675	28.1827	30.6605	36.3075	37.1097	33.5768	38.2092	42.3176	42.1666	40.5714	33.8343	37.1056	38.9834
AGRP_1	AGRP		protein_coding	0.513328	0.814454	0.131764	0.299287	0.532391	3.10095	0.149702	1.33586	0.285812	0	0	0.335456	0	0.530623	0	0.503566	0	0.396699	0.110541	0	0.569596	1.38775	0.380147	0	0
AGT_1	AGT		protein_coding	0.031026	0.026913	0.056106	0.076271	0.128256	0.155557	0.02679	0	0.596732	0.092118	0.182856	0.204756	41.1983	266.874	153.891	0.209458	0.121565	21.0135	0.515546	92.4116	44.5489	34.6098	0.108969	6.19257	52.2322
AGTR1_1	AGTR1		protein_coding	0.359558	0.294039	0.926602	0.736129	5.28818	3.21305	0.075603	0	0.615478	0.391536	63.4253	33.6426	70.3666	38.3252	44.7526	40.4699	62.9756	57.3253	39.5041	35.3107	21.8813	37.3546	9.64467	20.0172	28.6231
AGTR2_1	AGTR2		protein_coding	2.06084	1.11492	0	0.019742	1.30432	3.3247	0.104721	0.324236	0.454381	0.32538	19.7931	19.3884	27.7813	12.4337	22.9767	19.8606	22.6052	17.596	11.1959	12.2226	8.51197	8.76778	5.34905	7.88051	9.18968
AGTRAP_1	AGTRAP		protein_coding	18.3103	15.0567	17.9475	20.3853	16.7333	18.2086	47.4239	43.3613	24.3131	27.6753	44.4349	43.1971	44.0235	41.9869	39.825	46.1644	51.9252	39.1537	53.6651	53.2543	47.4506	60.9471	48.5153	69.4628	51.9545
AHCY_1	AHCY		protein_coding	107.592	138.152	191.608	238.869	119.963	121.182	413.218	341.428	167.166	132.82	63.5801	66.4186	77.1352	77.4224	80.4813	68.6253	93.2787	114.81	99.2342	155.525	147.32	114.123	137.443	110.086	136.114
AHCYL1_1	AHCYL1		protein_coding	52.4388	46.146	44.7911	52.1607	55.9595	75.5948	48.9263	58.3159	14.9553	16.4828	51.8174	43.9806	42.9899	46.9596	41.7634	47.6245	48.8914	40.3976	50.2663	57.805	47.9858	47.59	35.251	42.7222	45.1644
AHCYL2_1	AHCYL2		protein_coding	19.2249	17.9652	35.7862	37.4372	21.445	23.6864	31.3777	31.9649	18.3461	15.7285	24.43	21.8923	23.1768	21.9708	23.147	25.3016	23.6531	24.8577	24.7397	24.9339	25.4715	22.6287	22.6513	22.3412	25.1452
AHDC1_1	AHDC1		protein_coding	19.278	18.9783	24.4067	27.9454	16.5922	35.8635	14.8891	32.3792	6.33524	6.18508	24.3106	22.5104	22.0845	20.5415	20.4316	27.4087	17.7918	20.2581	22.6184	21.0435	16.0391	19.0228	16.6455	18.6397	18.0044
AHI1_1	AHI1		protein_coding	6.13196	5.25061	2.59097	3.13483	6.09754	7.44026	5.57394	6.76568	1.62093	0.969434	8.6715	9.25959	10.1324	9.34947	10.207	10.0871	11.6663	9.7473	10.115	7.61583	6.52638	7.922	6.5083	7.24264	7.21843
AHNAK2_1	AHNAK2		protein_coding	5.50251	13.8277	4.75959	17.8186	5.70639	26.1037	10.4513	54.6966	125.164	53.6389	97.6211	92.8104	86.6436	69.6786	75.9166	31.0139	72.6911	81.2323	78.6706	87.7405	33.6514	85.0129	62.8264	68.8621	66.8691
AHR1A_1	AHR1A		protein_coding	45.2284	72.0275	13.1589	13.2078	69.7509	70.3321	22.7668	21.5688	27.627	26.5206	30.6737	32.0773	27.2804	29.712	31.9222	28.0275	30.9284	33.8389	31.4817	35.7137	40.1268	32.5795	37.7067	42.7936	38.4281
AHR1B_1	AHR1B		protein_coding	0.437396	0.642262	0.291237	0.165471	7.36669	11.7913	0.258646	0.097888	0.478595	0.099367	7.06055	9.46171	9.38239	7.52763	11.2296	8.9286	14.7966	10.1225	14.8204	13.3963	11.1376	13.3434	9.80433	11.7595	7.98963
AHSA1_1	AHSA1		protein_coding	119.97	119.101	121.751	121.734	115.333	96.9667	141.167	129.664	46.4044	45.0562	96.3735	135.635	113.321	126.178	121.268	112.527	104.689	97.9675	117.811	129.087	110.614	113.74	134.728	125.043	111.094
AHSA2_1	AHSA2		protein_coding	57.2671	52.2918	38.4565	38.025	30.6685	29.156	45.7954	45.6082	12.6626	10.0568	34.4819	44.7546	35.9589	39.7839	41.5933	35.6715	42.0199	41.2841	43.5576	47.5152	44.6064	44.8398	52.5352	48.3618	36.4453
AIDA_1	AIDA		protein_coding	66.9323	65.532	40.555	42.6731	65.0488	61.1665	55.1677	40.3714	12.2946	10.1482	89.3863	92.1219	79.0155	82.5123	93.4256	75.8356	90.4085	82.7761	79.4675	72.9134	64.7468	62.1986	57.5207	62.944	65.0726
AIFM1_1	AIFM1		protein_coding	92.9928	92.3892	109.409	106.4	73.0961	80.8908	100.091	104.676	17.0571	15.8955	70.8836	80.9611	77.8078	85.4654	66.0818	71.4113	73.1482	68.0574	70.9328	66.0233	63.149	68.5426	58.5209	67.5613	61.7485
AIFM2_1	AIFM2		protein_coding	6.76628	6.46168	3.28373	3.86855	7.57194	8.50418	2.97907	2.38635	0.986537	0.766141	8.66542	8.10199	9.92878	8.47787	8.99837	6.84758	9.36469	8.7709	7.34935	7.93226	6.56722	7.955	5.6902	5.51261	5.83915
AIG1_1	AIG1		protein_coding	9.90104	9.01034	21.323	20.9251	5.61021	6.44723	34.0909	34.805	35.0013	30.6159	51.7671	55.2766	52.813	49.9001	49.9147	53.1377	48.5301	50.6463	46.1049	50.0361	56.0858	51.429	55.0187	51.3569	49.8315
AIM1_1	AIM1		protein_coding	8.56428	4.00607	52.3428	48.1023	1.22456	1.98603	53.6416	77.5145	320.178	361.284	87.748	86.4926	82.0455	85.4799	82.167	88.2559	126.633	125.648	134.185	132.715	166.943	129.863	211.028	200.47	155.918
AIM1L_1	AIM1L		protein_coding	1.32542	0.337477	36.9498	39.0209	0.144676	0.0678	22.9601	55.8583	37.0151	28.58	10.4462	11.0145	8.53613	9.93039	11.5685	12.9851	12.4978	15.0614	15.2975	16.8949	19.5016	16.7521	32.2211	21.168	24.8809
AIMP1_1	AIMP1		protein_coding	116.301	124.157	93.1539	92.7506	143.203	116.131	107.13	90.3318	51.1985	39.0991	108.803	93.6199	109.796	81.0324	81.8602	74.1288	84.6051	100.203	80.0675	72.7231	74.5543	91.3837	86.0557	84.9854	78.4471
AIMP2_1	AIMP2		protein_coding	80.7414	76.663	72.7414	60.5622	64.542	49.0469	82.4668	70.1623	40.4563	34.6096	70.1133	82.2564	68.2906	76.1302	70.3722	72.7014	71.4829	66.558	77.5552	87.9688	83.8716	79.3683	99.5685	88.4488	84.8637
AIP_1	AIP		protein_coding	18.8305	21.4273	22.8103	22.7178	19.2537	22.6779	20.3237	29.7281	9.80418	11.2088	36.4983	35.972	37.2773	37.4443	34.7495	42.4311	30.4805	29.8979	28.6699	34.1446	38.9024	38.1095	24.8803	31.6411	33.79
AIPL1_1	AIPL1		protein_coding	1.05008	1.13465	2.36098	3.29405	0.429306	1.77712	0.599903	1.94939	0.536139	0.298217	0.581966	0.926577	0.709314	0.612252	0.937997	0.579046	0.896524	0.336796	0.618458	1.0099	0.324859	1.14011	0.949494	0.89763	0.523771
AJAP1_1	AJAP1		protein_coding	0.4132	0.414604	1.18935	1.71133	0.493831	0.678034	9.21747	19.6645	1.33227	1.02681	17.1516	18.4164	18.5587	15.3001	20.2165	18.4354	19.8754	19.1079	26.2424	15.2314	15.3406	16.9005	16.1503	21.1263	13.827
AK1_1	AK1		protein_coding	54.8124	52.4915	1.74335	0.443238	57.1135	56.9216	1.53903	0.590577	14.5822	13.7732	44.1384	54.7741	63.0226	62.3646	44.9693	50.8266	44.9796	36.6095	44.0005	47.782	30.8253	39.3465	30.7517	30.3347	45.8393
AK2_1	AK2		protein_coding	113.638	115.201	117.862	121.894	106.841	102.804	129.478	115.102	65.4472	61.8652	249.107	252.939	247.306	295.942	251.79	240.735	239.427	236.223	244.48	233.542	212.476	217.784	193.378	212.238	214.976
AK4_1	AK4		protein_coding	28.9523	29.0065	33.6282	49.4297	19.9262	29.1327	24.7839	33.2296	7.04634	7.09837	45.0159	44.6318	41.1592	37.5063	44.0507	48.7651	44.1423	47.3199	47.2938	35.1624	38.42	35.2878	35.2599	35.8215	32.5171
AK5_1	AK5		protein_coding	4.74192	5.4101	0.320117	0.358754	2.58043	1.46599	0.702257	0.895046	0.31596	0.5254	1.06201	2.03928	1.32841	2.00958	1.59585	2.38996	2.13887	2.49369	2.89974	2.81496	2.48376	2.05226	2.89799	2.95495	2.48498
AKAP1_1	AKAP1		protein_coding	55.0364	56.9989	64.8731	75.3754	54.272	58.0994	94.0732	100.817	77.094	67.9166	58.4211	64.1231	63.1738	61.4508	57.1211	64.2302	62.4982	61.3299	43.082	76.1005	70.0615	75.3381	88.633	82.8065	83.0533
AKAP10_1	AKAP10		protein_coding	33.2278	34.7394	30.1119	32.1389	34.5022	36.6049	30.5193	28.0432	13.3087	11.035	43.5199	49.3126	46.0349	44.2436	50.8008	44.1256	51.9111	48.8027	49.6729	47.9496	47.7727	46.4079	45.6599	48.5247	43.112
AKAP11_1	AKAP11		protein_coding	21.6699	20.107	18.9054	21.691	16.6498	20.4698	20.5532	20.3807	7.57199	5.93314	20.2509	19.6565	18.1815	18.6712	20.7414	18.4214	22.454	22.6482	19.9462	22.2592	21.3354	19.412	19.6976	21.638	19.8118
AKAP12_1	AKAP12		protein_coding	360.354	320.596	15.9701	8.69997	493.189	514.396	18.9833	21.6263	13.4471	12.3674	69.7685	61.5595	80.7309	66.6438	84.5162	75.3095	82.6472	70.0821	76.3162	62.063	46.7432	58.3179	50.5451	52.5844	56.1794
AKAP13_1	AKAP13		protein_coding	23.6017	49.2762	33.2858	35.5702	57.6724	69.9672	41.7067	48.3789	15.0301	15.1418	49.4701	44.8575	44.8872	48.0131	48.5022	46.1468	21.9249	20.1552	49.7088	44.9593	45.6089	39.7562	36.7736	45.1216	17.4336
AKAP17A_1	AKAP17A		protein_coding	18.5122	17.846	23.7811	24.7199	20.431	23.5907	23.7852	25.7975	9.44669	8.14025	21.7897	27.0868	22.1743	20.4745	24.6312	23.0314	25.3298	21.3228	21.9404	23.889	22.9157	21.1274	25.2032	27.8757	19.3578
AKAP5_1	AKAP5		protein_coding	3.60719	4.23231	4.76122	4.21903	8.86505	1.5478	6.91983	8.42991	1.26823	1.37985	0.991199	1.28082	1.02168	1.5258	1.06722	1.43317	2.30622	1.68753	2.24403	3.70788	2.93229	2.94936	3.44326	3.61022	2.95744
AKAP7_1	AKAP7		protein_coding	16.6371	13.1264	10.7102	10.3697	25.4705	20.338	12.9998	12.605	3.48088	3.10448	31.9707	37.3894	31.8717	35.9612	44.3136	31.0597	30.0062	27.3788	33.1116	29.0607	19.0067	50.3931	25.3382	27.5556	28.0486
AKAP8_1	AKAP8		protein_coding	50.4315	45.3683	51.2223	61.0341	52.576	112.317	51.595	79.8243	16.5458	15.8807	37.4393	29.9815	34.8399	30.7428	29.8012	37.0777	31.7222	34.3963	30.8203	43.4525	31.0887	37.7603	29.9134	33.2397	27.8058
AKAP8L_1	AKAP8L		protein_coding	52.3895	52.8731	62.5813	63.4775	62.391	66.4781	62.4081	66.0192	21.175	20.5832	30.6108	34.9865	34.3451	33.2342	37.7739	43.2047	32.9307	32.4667	34.7858	36.8299	38.2952	35.162	39.3952	37.1548	33.9724
AKAP9_1	AKAP9		protein_coding	35.5867	36.431	37.4907	42.9021	30.2588	51.3603	32.6862	48.4187	34.3834	38.1592	23.0858	21.9369	21.0741	19.5845	24.9689	21.1795	26.3207	21.4296	26.9122	29.0235	28.007	25.5666	34.4142	32.3621	27.4565
AKIP1_1	AKIP1		protein_coding	31.8867	21.9049	18.582	16.8031	15.6244	17.8873	25.9324	27.2108	6.17567	6.08629	24.4675	32.0476	23.7349	29.4966	30.3479	24.6639	28.9034	34.9854	39.4829	39.2265	32.701	35.9406	39.7149	36.9867	36.0859
AKIRIN2_1	AKIRIN2		protein_coding	129.663	134.693	117.483	119.333	129.195	136.673	116.154	112.674	45.8866	39.4159	90.7146	105.951	100.115	104.313	109.306	99.3821	114.385	105.785	98.1494	115.343	126.905	112.734	110.454	111.457	104.438
AKNA_1	AKNA		protein_coding	14.6809	16.8705	15.7286	20.5742	14.989	28.398	8.80104	13.1828	2.07207	1.80339	6.7839	5.74242	6.23417	5.9336	5.83833	6.28686	6.0217	4.91799	5.02391	6.82892	6.05954	5.0359	4.02135	6.06034	3.77895
AKNAD1_1	AKNAD1		protein_coding	1.85812	1.54327	1.42065	1.719	2.38668	4.6415	1.72905	3.32953	1.48115	1.05069	2.40759	2.45258	1.16548	1.50793	2.51252	1.67488	1.15812	1.62259	2.09332	1.40357	1.90461	2.00066	1.40706	2.25338	2.12716
AKR1A1_1	AKR1A1		protein_coding	129.41	117.654	134.671	127.306	81.5935	80.9925	93.4981	77.8753	13.9359	15.8179	100.396	122.282	118.536	93.6242	106.047	81.1486	82.9571	85.5608	104.833	87.9024	85.9312	77.7782	75.7405	72.8105	72.3372
AKR1B1_1	AKR1B1		protein_coding	220.693	235.223	234.345	218.82	385.046	358.818	233.142	177.934	32.557	28.2451	385.109	384.736	390.647	477.082	427.319	293.87	305.897	342.885	346.562	297.034	262.749	298	220.206	249.203	246.343
AKR1B10_1	AKR1B10		protein_coding	27.6596	25.2059	26.6057	18.0682	203.455	189.4	121.176	101.907	31.7115	14.323	338.334	474.735	328.274	388.312	401.985	308.089	374.706	473.108	324.51	257.192	248.244	274.741	261.236	247.009	216.182
AKR1D1_1	AKR1D1		protein_coding	696.864	564.384	76.9775	61.2701	27.6944	16.1107	31.0202	15.3693	1.3215	3.24254	30.3156	30.0608	36.2772	46.9212	22.2793	38.6047	57.0716	58.1334	42.1588	86.8553	66.1175	65.6442	41.1234	62.865	64.9981
AKR1E2_1	AKR1E2		protein_coding	14.8877	14.7001	23.2802	30.5975	17.316	17.0126	24.4817	21.8923	7.40586	8.05463	48.2596	40.6649	43.7493	36.2143	39.7718	39.5222	41.5059	44.9646	36.6802	35.9541	36.0714	34.6316	31.8414	36.3217	33.5418
AKR7A2_1	AKR7A2		protein_coding	61.3122	62.2495	77.5569	75.007	52.5675	61.5869	71.5668	77.2667	28.3603	27.9336	80.2059	78.2669	87.8157	74.8551	81.6576	74.8423	71.2294	81.7698	80.5284	84.6856	87.8049	80.9901	66.2621	74.3963	70.3292
AKT1_1	AKT1		protein_coding	111.956	117.136	66.4142	66.4096	107.92	111.818	71.0384	68.0594	20.7532	18.7575	65.3345	81.9599	69.2077	74.5223	77.2813	72.2967	77.7199	66.6186	62.1546	68.5905	64.1861	67.1545	62.4635	68.5894	61.4234
AKT3_1	AKT3		protein_coding	39.6845	34.373	10.466	13.2186	21.9511	25.2742	8.49848	8.39816	3.19529	2.31742	22.4881	22.9069	23.0712	20.4969	24.1596	27.3712	25.953	25.128	24.171	19.133	14.996	16.9933	14.2323	18.1427	16.0842
AKTIP_1	AKTIP		protein_coding	38.5423	57.6016	25.4951	29.7807	18.8711	20.5721	27.9314	28.6882	34.4029	27.1249	49.5837	54.4569	53.2207	48.9405	50.9968	55.0561	53.4614	51.4155	50.2655	50.9426	53.3186	56.8294	53.7687	60.0062	51.8308
ALAD_1	ALAD		protein_coding	14.6254	12.8222	20.682	20.369	10.5909	12.9318	21.9559	28.1489	11.5913	15.4651	24.3615	23.5003	22.3665	25.6245	22.4332	30.0066	21.3892	23.7778	21.1058	27.5618	24.0433	23.6294	22.9688	21.9647	27.307
ALAS1_1	ALAS1		protein_coding	57.2963	55.7137	49.6501	45.1435	45.3472	49.8123	40.8056	46.65	18.0309	21.861	58.7862	53.0031	68.0863	57.5598	45.3806	62.4594	50.2531	44.2093	46.7248	64.8979	48.3207	48.5671	44.8827	43.6855	62.5
ALB_1	ALB		protein_coding	1.28543	1.8053	1.32183	1.93173	1.4302	1.77709	0.777457	0.547	6.00906	2.14227	1.09027	0.792526	0.886372	1.48821	0.721556	0.429496	0.610856	0.809042	0.296056	0.791374	0.922283	0.601301	0.227526	0.422875	0.339812
ALC_1	ALC		protein_coding	0.325982	0.069277	44.6645	25.9668	0	0.126821	18.6031	22.7277	9.60512	8.77658	1.26875	1.8238	0.842254	1.73005	0.888494	1.74354	1.8807	2.5422	2.74379	4.53409	4.50078	5.99954	5.40609	4.35406	5.39113
ALCAM_1	ALCAM		protein_coding	117.825	120.72	130.701	149.229	193.596	151.403	161.559	178.521	45.3357	33.7574	48.5472	43.0251	47.724	41.8716	38.4213	37.2715	51.6353	38.6293	38.0757	41.7985	24.6842	33.8137	23.0305	28.3785	33.9521
ALDH18A1_1	ALDH18A1		protein_coding	32.7819	25.7469	68.8829	66.9062	21.5267	24.9633	57.7523	65.2468	130.141	126.454	66.8528	57.2085	49.0294	56.5856	57.6607	45.4091	62.9518	47.6331	59.2577	61.7963	67.3445	58.4366	75.4248	57.7861	82.1818
ALDH1A2_1	ALDH1A2		protein_coding	8.4725	11.0316	2.69714	3.10706	15.2565	12.8399	5.93017	4.26664	5.18351	5.21439	8.07313	5.67974	7.30515	4.79814	5.80553	8.4125	7.16324	8.27357	9.51756	5.56149	6.31616	6.32181	7.08845	7.90866	5.20383
ALDH1A3_1	ALDH1A3		protein_coding	29.6381	43.8501	0.123122	0.0653	98.736	178.043	0.219606	0.305521	32.3729	19.2833	49.7213	38.1221	33.9658	47.1134	41.7927	42.7019	52.5689	70.2952	41.1612	44.7145	32.0407	37.2036	22.6315	36.2058	41.6884
ALDH1L2_1	ALDH1L2		protein_coding	76.8877	104.281	16.8722	19.971	26.6923	29.8494	43.7857	42.5538	98.6299	121.507	64.2988	59.8523	64.9853	52.3254	52.813	38.4484	48.7682	45.5287	36.1866	31.7762	24.1293	32.6107	26.6232	32.0693	34.9575
ALDH2_1	ALDH2		protein_coding	128.687	141.472	182.895	209.374	158.17	140.503	167.722	152.677	125.989	122.74	192.684	193.474	185.86	192.769	177.849	166.466	187.676	181.182	183.097	195.437	187.24	206.517	173.121	184.253	191.6
ALDH3A2_1	ALDH3A2		protein_coding	44.1369	42.7303	60.0135	62.2548	45.0075	50.0304	63.6939	58.3028	50.8201	41.7301	309.11	251.002	272.451	273.127	259.264	319.222	306.453	236.055	250.793	226.805	195.876	253.395	150.615	195.996	169.039
ALDH3B1_1	ALDH3B1		protein_coding	0.679102	0.981051	6.93235	6.5478	0.554904	1.39451	1.57247	1.93945	117.821	113.307	48.7219	43.6169	40.9089	57.5264	68.1945	77.3285	96.6067	102.747	110.525	86.2616	123.56	90.684	137.493	139.83	97.6947
ALDH3B2_1	ALDH3B2		protein_coding	2.98753	3.68031	0.675111	1.17896	5.24221	4.73076	3.07576	2.58622	3.20046	3.85561	8.87672	9.33781	9.63274	8.74929	9.28439	10.6637	10.3791	8.70705	10.25	11.3722	12.1592	9.11445	14.1652	10.4418	8.80993
ALDH4A1_1	ALDH4A1		protein_coding	35.8408	27.7755	69.0825	60.3651	27.4892	30.844	62.5586	70.9785	13.4021	11.1525	45.238	47.8094	45.3804	53.1149	44.8247	46.4325	54.165	44.5108	48.8518	50.9185	43.9193	46.0041	35.8405	41.7571	41.7653
ALDH5A1_1	ALDH5A1		protein_coding	30.4745	32.3228	22.556	28.8059	22.8762	22.4507	23.5455	20.3056	5.49856	6.09422	29.9422	34.1112	28.5766	29.2992	31.5108	30.01	34.7339	32.6082	29.0609	29.2766	26.4796	27.6656	26.5756	27.6082	30.8016
ALDH6A1_1	ALDH6A1		protein_coding	47.2411	43.5386	36.5572	37.7943	39.3591	36.6898	35.408	29.0198	11.5077	9.78161	89.6842	77.694	86.9344	88.1802	67.1796	74.6848	67.4431	66.3685	57.2866	51.1354	41.2636	50.1709	33.8534	49.6235	42.7743
ALDH9A1_1	ALDH9A1		protein_coding	120.719	114.266	136.674	130.228	110.47	102.09	140.305	121.528	44.8561	45.203	118.351	140.244	140.13	137.494	142.74	106.624	131.252	117.447	132.356	135.854	125.73	127.129	112.648	106.278	122.358
ALDOC_1	ALDOC		protein_coding	416.554	407.429	531.518	505.634	287.189	326.615	416.226	405.415	603.341	660.322	495.389	557.52	590.392	511.389	484.262	527.941	520.734	471.634	482.557	528.831	504.528	560.005	496.42	473.585	553.224
ALG1_1	ALG1		protein_coding	26.9919	20.1709	23.0469	18.4965	14.5179	18.4793	18.1259	20.5868	9.19365	12.2663	34.9372	34.7747	37.1523	25.8388	36.1678	26.267	25.899	34.126	37.5928	29.6595	29.9873	22.6537	23.7649	22.4557	26.1441
ALG10_1	ALG10		protein_coding	21.3023	20.4228	16.9566	20.469	19.4001	13.5885	24.3344	13.9294	6.94799	5.61976	22.4404	20.8984	18.1872	19.61	21.687	19.2997	23.3765	21.1095	20.088	20.7539	19.9267	21.8437	19.2702	20.8003	20.3982
ALG11_1	ALG11		protein_coding	11.3995	11.024	16.9153	18.193	10.9985	15.253	18.1393	14.5207	8.89659	9.17529	18.2069	13.2949	15.0322	13.6483	15.6148	12.9055	16.0777	19.2403	18.9194	18.2836	17.409	20.2153	15.9198	17.7891	16.4518
ALG12_1	ALG12		protein_coding	70.546	73.5667	37.5648	44.3894	75.07	55.7628	52.633	35.2879	14.205	9.39208	99.1226	110.872	104.697	101.612	108.976	72.0282	97.2267	95.0546	111.039	92.9957	88.6545	84.4503	91.6881	98.937	80.3474
ALG13_1	ALG13		protein_coding	5.43431	4.75872	1.92515	2.05776	3.18956	3.44716	2.15079	3.3782	0.531449	0.611276	3.22819	3.21804	3.06044	2.79493	3.02984	2.80881	2.40241	2.8459	2.77724	2.99176	2.90846	2.63377	2.83604	2.53938	1.9882
ALG14_1	ALG14		protein_coding	10.8282	8.26787	9.27377	9.09835	7.55981	8.44937	7.07959	8.54402	4.10321	3.55887	15.7365	14.4103	15.4089	14.3026	18.4114	17.0106	15.0285	17.174	15.0254	15.42	15.7142	12.8289	18.1981	15.9918	14.6336
ALG2_1	ALG2		protein_coding	31.2104	28.1402	31.016	27.9864	23.7056	22.3804	23.2901	22.1497	9.63851	7.58563	37.4495	43.4836	35.996	38.1079	38.893	42.379	34.0343	36.6851	35.7799	33.896	33.5937	33.2011	35.2921	36.1306	35.2276
ALG3_1	ALG3		protein_coding	13.8387	13.0465	20.8586	25.7031	12.8706	17.3566	18.0875	29.1901	11.2262	11.7761	13.918	14.1176	13.8971	12.1291	14.1221	14.203	13.784	11.9299	15.1524	17.8661	17.2887	20.3752	17.8481	16.8758	16.7549
ALG5_1	ALG5		protein_coding	20.563	19.4336	17.6913	20.6725	18.5636	19.694	20.5572	17.1937	9.5869	8.35552	52.4657	56.104	47.4913	47.965	53.5058	52.0878	52.0104	49.3986	48.916	42.5659	38.7611	41.8199	36.2924	42.4284	37.1658
ALG6_1	ALG6		protein_coding	26.8794	23.4292	21.1125	21.1453	18.3218	17.657	30.224	24.9925	6.22055	5.8864	39.6688	44.241	42.437	38.82	43.5861	35.3228	47.3183	40.2078	39.415	34.421	33.9554	36.4114	28.9915	36.17	28.7334
ALG8_1	ALG8		protein_coding	26.2428	25.0805	26.6293	31.9301	23.1331	26.6316	33.5954	39.957	6.86583	5.9585	22.6739	24.4695	26.9615	26.1397	25.3448	23.9744	23.9896	23.6632	22.881	27.1149	26.2234	21.3118	26.3156	25.6695	19.634
ALG9_1	ALG9		protein_coding	20.4064	21.1783	32.8492	34.0565	25.8619	29.7416	31.2043	34.9525	12.4488	10.3228	33.989	33.4176	35.855	30.0604	30.3364	30.3257	29.3981	31.9215	28.8127	30.5056	33.1167	32.1598	28.0199	30.4952	29.0038
ALKBH1_1	ALKBH1		protein_coding	15.3345	18.4434	14.032	18.8634	13.7162	15.0655	16.2667	18.0165	4.62607	4.07986	19.1526	21.9007	17.563	21.3214	20.0658	20.3458	19.8433	19.2681	18.3601	19.471	18.1204	22.5144	20.1307	22.0883	16.3779
ALKBH2_1	ALKBH2		protein_coding	8.90054	9.04008	9.81182	10.2012	8.57217	9.33525	9.59785	12.6811	3.72958	2.96218	10.3341	14.2261	14.7477	13.2124	14.6034	13.5984	12.1446	16.1966	13.4825	10.5996	13.2647	11.6947	9.6057	12.2417	12.0763
ALKBH3_1	ALKBH3		protein_coding	11.3687	11.9295	8.38864	11.3537	11.004	13.8935	11.0381	13.0709	3.7354	3.63399	9.5638	10.1034	7.56571	9.44162	8.51631	9.59968	10.7954	9.66852	9.57391	11.5422	10.4069	10.9969	11.0975	11.3012	8.14389
ALKBH4_1	ALKBH4		protein_coding	3.77938	3.67241	2.17596	1.48627	4.39641	5.31607	2.0359	2.5894	2.34086	2.04238	7.60277	8.85681	8.94577	7.23004	7.22308	8.9505	7.95922	7.56597	7.7366	6.90439	6.47282	7.88364	6.31055	7.16471	5.6857
ALKBH5_1	ALKBH5		protein_coding	26.2802	24.565	58.7889	52.4925	26.9535	25.6464	35.6322	29.935	18.8429	18.1776	34.8471	39.2514	34.4665	34.225	38.1914	39.6386	33.4586	36.1595	37.852	34.2446	33.7587	31.2138	31.8324	36.9385	31.751
ALKBH8_1	ALKBH8		protein_coding	11.8759	13.133	15.1926	15.7258	7.86889	9.57568	10.4039	13	3.88293	4.07029	7.88957	9.36593	8.85371	8.50768	8.55904	5.86875	8.92695	12.3238	12.88	8.76056	10.3979	11.884	11.0359	11.9552	10.1405
ALMS1_1	ALMS1		protein_coding	30.7944	29.0884	31.3939	33.1757	29.0844	35.3696	35.2466	41.305	6.44394	5.4307	15.3209	15.6304	14.2745	16.346	15.1756	16.1093	17.5732	15.4185	17.2785	19.0496	17.1251	15.9423	19.3977	19.087	14.8578
ALOX5_1	ALOX5		protein_coding	23.662	33.8899	1.32377	1.88458	4.6585	1.9222	0.755888	0.702756	0.72701	0.486107	9.46659	5.8646	4.96873	6.39102	7.10205	4.55912	5.96219	7.78326	5.52367	7.43562	11.187	4.58851	3.78933	3.67164	7.56234
ALOX5AP_1	ALOX5AP		protein_coding	0.155649	0.222669	0	0	0.321671	0	0	0	0.223928	0.153309	8.21423	8.07886	4.36576	6.4127	8.17186	5.0938	10.4604	6.2263	5.27664	9.3721	13.5584	3.84412	5.8003	6.14652	6.55714
ALPK1_1	ALPK1		protein_coding	0.145391	0.137214	1.74666	1.64468	0.059618	0.329236	0.435364	0.910175	5.00731	5.79912	13.741	12.2762	13.5205	10.2343	11.5567	10.4776	10.9995	14.6042	11.9881	8.91837	11.6492	12.3365	9.37326	11.8217	7.33046
ALPK3_1	ALPK3		protein_coding	1.08012	0.788151	4.36531	4.01021	0.441155	0.73925	1.21897	1.25434	0.25926	0.621227	0.786019	0.292063	2.16339	0.600293	0.246123	0.380366	0.297876	0.289904	0.563064	0.431753	0.579006	0.515482	0.535226	0.507304	0.506
ALPL_1	ALPL		protein_coding	3.74695	4.79337	4.7772	6.43429	22.5621	51.843	9.04875	15.5769	9.05506	11.3068	12.1702	10.4257	15.0092	13.4228	17.6016	15.1628	26.2357	22.8322	29.0354	36.223	31.4794	30.0052	25.3393	26.4019	32.0155
ALS2_1	ALS2		protein_coding	18.4284	16.6947	26.2853	31.6699	17.4101	24.7185	27.6271	33.2959	7.61542	6.84112	20.0117	23.4701	21.5783	20.7343	22.1266	22.5353	22.9285	20.2437	23.6498	23.8656	23.3106	21.6148	23.2234	22.2958	19.5558
ALS2L_1	ALS2L		protein_coding	2.6367	3.04088	2.27812	3.5041	2.61461	2.745	3.37844	3.50888	33.1589	21.253	43.2012	47.2862	53.0234	49.4427	51.6331	45.8033	61.8408	53.085	54.8137	55.3018	54.9973	51.918	55.9053	53.5128	48.3574
ALYREF_1	ALYREF		protein_coding	302.34	314.329	291.765	290.468	234.631	196.12	336.721	303.882	66.2872	65.1947	154.814	177.179	166.558	178.264	181.68	144.525	164.495	177.604	181.772	229.231	224.369	194.599	204.972	179.014	187.499
AMBRA1_1	AMBRA1		protein_coding	34.3338	31.8255	33.4114	35.4013	29.8458	43.3451	30.1474	37.9854	26.9775	29.5587	22.5932	21.8705	22.4357	21.6243	24.9908	25.7328	24.5331	22.7997	24.3185	26.7683	28.7711	25.0005	25.2827	24.9005	25.7472
AMD1_1	AMD1		protein_coding	55.0015	48.4265	75.5986	66.5653	73.9184	45.1391	106.013	60.4044	47.9929	23.7967	114.483	169.302	139.119	131.597	118.941	124.138	109.964	106.524	109.889	109.593	103.626	103.64	129.717	141.711	106.802
AMDHD2_1	AMDHD2		protein_coding	16.7549	15.4542	18.3674	19.5738	12.9933	18.4897	16.5828	21.2694	8.50742	8.96044	18.3641	17.1367	15.2238	16.6462	17.4687	19.7858	16.3375	16.5611	16.6692	17.446	17.1785	19.5447	17.7959	16.2366	16.1006
AMER1_1	AMER1		protein_coding	27.2101	25.2939	32.7313	35.8987	28.0563	34.2496	35.6175	38.0998	8.44502	18.4818	19.7887	22.2575	21.0567	13.4147	22.8159	23.0292	20.4793	18.4005	21.2848	25.3487	22.677	22.6013	25.2308	26.244	22.6347
AMER2_1	AMER2		protein_coding	0.831701	0.498599	3.2701	2.68322	2.52142	2.92311	2.37815	1.47403	0.369438	0.944464	0.389459	0.408358	0.48068	1.13804	0.812134	0.335931	0.702465	0.833464	1.08741	0.753209	0.905198	0.924164	0.7986	0.999564	0.750296
AMER3_1	AMER3		protein_coding	10.4932	5.0525	1.14647	1.09262	4.10451	2.93821	0.23975	0.151456	0.494613	0.656632	1.57649	1.19222	1.17148	0.997895	1.08493	1.35956	1.53619	1.30225	1.04233	0.788236	0.626983	1.13757	0.477567	0.592085	0.968888
AMFR_1	AMFR		protein_coding	59.4183	57.471	37.1763	42.7353	45.0692	47.5387	28.7138	25.0763	25.1016	20.5801	64.0966	64.2116	64.5449	59.2149	63.6157	68.5097	63.0714	56.8793	62.0165	62.381	59.5713	63.5788	51.9799	56.8289	58.8226
AMHR2_1	AMHR2		protein_coding	20.3462	20.4014	12.2279	10.8479	12.9575	33.73	9.22574	15.4663	9.39524	6.33912	16.4362	14.0036	12.1777	13.9148	14.4506	23.0644	13.158	12.9488	12.5464	9.9517	17.314	11.0522	8.61292	14.7961	14.2427
AMIGO2_1	AMIGO2		protein_coding	12.8138	10.4962	33.9274	20.1992	8.67838	7.45817	52.3968	26.081	0.998564	0.911307	6.51513	8.26336	8.18096	8.65624	6.57224	8.27126	13.5182	8.53234	13.4318	13.5266	10.5384	12.9619	8.14484	11.4783	11.1738
AMMECR1_1	AMMECR1		protein_coding	63.3582	57.3815	40.8593	47.2259	30.4543	41.5565	50.5652	73.1762	66.5545	51.8186	25.2756	26.6412	23.3031	26.8874	25.1755	24.5901	28.799	27.6296	29.6543	35.8681	37.0462	28.6789	47.6327	42.4726	36.111
AMMECR1L_1	AMMECR1L		protein_coding	26.272	25.7282	22.3042	14.9615	23.3983	30.1068	25.0038	27.0946	10.0098	8.74527	26.7461	28.8837	30.2865	26.2973	31.3363	27.7057	29.4699	25.395	27.1953	28.7259	28.548	27.7324	25.9016	30.8656	26.4986
AMN1_1	AMN1		protein_coding	3.4501	4.15867	2.49229	2.91654	4.00328	5.22508	2.52619	2.79217	1.81387	1.29194	11.7057	9.57913	10.1584	7.15426	10.219	7.5856	8.92894	12.9065	9.35347	8.44433	8.28749	8.13719	6.71629	7.57752	6.54452
AMOT_1	AMOT		protein_coding	92.7508	82.6191	43.0032	51.6523	89.7227	125.445	55.6774	86.3845	61.8195	63.274	52.2196	52.0371	51.6826	46.9793	57.6961	47.4118	56.9106	52.8007	57.7741	56.2637	58.0945	52.8036	55.9871	53.4276	53.1065
AMOTL1_1	AMOTL1		protein_coding	8.2996	8.30404	31.7372	33.3501	19.3621	25.007	22.5153	27.5105	11.305	16.1528	31.0998	32.7607	29.5143	31.4065	32.9801	37.265	32.3203	30.8287	34.7368	38.0625	40.6759	34.6242	37.6065	41.0479	32.6916
AMOTL2_1	AMOTL2		protein_coding	15.172	11.5611	21.9349	24.0274	9.59427	13.0175	22.9988	33.1167	28.9728	34.2719	49.159	49.1322	54.3697	44.0223	51.4339	53.8762	42.4725	34.6762	36.0507	32.8121	27.6064	35.6131	32.4518	38.545	38.0161
AMPD2_1	AMPD2		protein_coding	27.8203	23.5662	21.9955	25.2226	24.6655	41.6669	17.7471	28.8728	8.25302	9.35572	13.0255	12.3034	12.6521	12.9411	15.1074	15.4806	14.9218	13.6175	13.9337	16.9553	14.9062	14.4965	12.5203	12.5698	14.8708
AMPD3_1	AMPD3		protein_coding	0.997136	0.801148	7.8204	12.7688	0.644301	1.40929	12.4368	9.75666	0.340775	0.166863	8.86344	10.3766	8.7411	7.09075	6.99679	6.26298	9.99109	7.3038	7.7387	3.99832	4.53083	4.13676	5.31329	5.62729	3.88132
AMT_1	AMT		protein_coding	43.2999	40.5027	41.534	39.4295	22.7808	46.5997	33.5377	44.2135	22.2251	20.2308	30.3217	31.21	27.1022	36.054	32.821	32.5095	36.1129	35.7217	37.2939	39.3552	35.3515	40.5621	40.1379	37.8974	38.4803
AMY1A_1	AMY1A		protein_coding	5.97417	4.11881	23.1067	28.1727	3.56238	9.45071	32.3376	29.419	8.76982	5.49865	30.0174	25.6317	29.5332	27.2567	27.244	29.8755	26.9104	25.6443	32.0534	21.1734	19.9958	23.2669	18.502	27.1592	18.3768
AMY2A_1	AMY2A		protein_coding	2.09811	1.33208	25.5772	31.8383	0.250513	0.15902	20.5453	35.7903	0.398552	0.385874	4.9478	3.64078	4.36322	7.39572	10.5075	2.48323	3.52209	4.01936	4.06292	3.63435	1.97503	2.51234	1.56233	1.10862	2.12114
AMZ2_1	AMZ2		protein_coding	0	0.153572	0	0	0.088944	0.25312	0.031012	0	25.1996	32.7378	0.343632	0.137375	0	0.327581	0.20629	0.833427	0.755034	0.404656	1.07258	3.51437	6.87761	5.76825	7.21303	5.77923	8.69073
ANAPC1_1	ANAPC1		protein_coding	45.4069	46.2533	65.9812	68.9784	35.6896	36.9027	56.7762	65.3268	20.5077	22.4921	26.569	30.4327	29.0958	29.2508	28.3606	25.9624	36.2208	27.7246	28.7932	34.7676	33.7663	29.3373	36.0703	30.0799	32.0954
ANAPC10_1	ANAPC10		protein_coding	14.283	11.5683	10	7.60562	13.2004	15.5385	11.148	14.4467	3.52175	2.56942	10.9895	12.7125	13.12	13.2304	12.6588	10.8464	11.9695	12.0734	10.4818	15.1546	13.1539	13.0527	13.8811	12.422	10.2133
ANAPC11_1	ANAPC11		protein_coding	18.0408	16.1447	22.9814	25.1859	12.6827	12.8486	20.0331	26.1234	7.26408	6.80981	29.2462	31.3868	27.9632	29.3816	34.8545	31.4395	29.4646	30.0537	23.7807	38.3917	33.7122	34.5543	30.0945	24.9821	33.5327
ANAPC13_1	ANAPC13		protein_coding	30.8048	26.8949	29.4976	26.3313	19.4577	17.3004	21.3809	25.7744	18.9375	14.9	36.9432	42.3466	31.682	34.7151	37.1354	40.0006	34.2189	35.6823	36.6903	43.081	42.9362	36.0551	35.4925	38.5254	34.1366
ANAPC15_1	ANAPC15		protein_coding	84.2773	59.2789	91.6427	54.6248	44.8453	68.6583	64.7703	87.4002	17.3545	8.72689	49.4143	21.118	52.663	28.6751	29.9133	38.1936	48.5357	37.8448	33.6878	31.9344	45.7335	32.1284	37.5125	58.9715	27.7232
ANAPC16_1	ANAPC16		protein_coding	88.0042	99.5377	90.4371	97.9896	74.27	70.5494	91.1381	81.8174	38.1166	37.6396	121.103	111.763	104.567	110.941	117.67	117.727	109.361	119.74	110.652	122.959	117.028	114.248	97.8656	99.3719	109.382
ANAPC2_1	ANAPC2		protein_coding	37.2157	37.7985	43.4871	48.9104	37.8171	41.3644	30.1197	35.1969	10.1625	12.3084	24.9058	23.3616	23.4103	23.234	23.4071	22.3827	20.8111	22.9834	20.2516	26.6279	24.3845	25.094	20.9538	20.6394	20.4324
ANAPC4_1	ANAPC4		protein_coding	35.4152	35.3871	29.7442	33.9843	30.1523	29.0677	40.6164	35.8615	8.46857	6.79697	32.1256	28.8401	29.0892	27.5761	25.8992	25.3461	32.0318	32.6648	33.3489	29.6325	28.2975	28.1906	33.776	31.6599	24.8355
ANAPC5_1	ANAPC5		protein_coding	23.6095	20.741	25.5232	25.7373	18.7227	19.0918	28.9296	28.4243	4.95872	5.13291	22.4428	22.2662	23.0553	23.2222	20.0422	17.327	21.3911	23.1294	24.146	25.4104	24.342	23.7355	21.4913	24.9429	18.2129
ANAPC7_1	ANAPC7		protein_coding	40.1795	38.8332	34.8254	35.0151	37.2669	31.4021	40.2314	36.4313	10.5255	8.39126	22.6784	28.5306	24.5631	25.5547	24.2267	22.6621	26.7924	26.8843	29.8116	28.4115	26.4453	29.4412	28.2042	28.0143	22.3251
ANGEL1_1	ANGEL1		protein_coding	49.9188	51.3853	92.9586	97.5176	61.3008	66.5229	91.4614	86.525	58.9077	56.437	64.1777	68.4139	65.7254	65.45	70.1063	71.8474	72.176	69.8172	71.9988	85.7402	82.729	77.6696	88.7205	84.1416	83.7129
ANGEL2_1	ANGEL2		protein_coding	21.1505	22.1549	28.9305	31.0659	23.1891	24.9493	22.1741	20.8635	11.2866	10.655	28.9209	33.7565	29.9828	30.7194	34.7	32.6389	34.5508	38.7918	33.09	38.4586	34.8832	35.6172	36.0601	36.4224	37.4237
ANGPT1_1	ANGPT1		protein_coding	1.99183	1.72059	0	0.266706	2.83684	1.88596	0	0.039977	0.742363	0.265511	4.2033	4.31333	4.32597	3.77742	5.0065	3.33232	4.92755	4.7167	3.46778	5.1197	3.59583	5.29347	3.12503	3.39335	3.90754
ANGPT2_1	ANGPT2		protein_coding	3.25557	3.25786	0.452766	0.297606	12.7073	10.7854	0.575747	0.218409	2.51478	1.91141	22.8294	24.8163	28.0333	30.3652	26.5343	29.3159	27.4183	22.4532	24.1067	20.9597	20.9616	17.9613	16.0128	19.7407	23.9962
ANGPT4_1	ANGPT4		protein_coding	4.90943	4.96797	0.476202	0.308301	9.76412	10.067	1.27726	3.30087	2.2923	2.99166	24.38	27.5143	33.6102	26.7514	24.9709	30.4825	27.3757	26.4961	24.9096	28.4573	14.2485	32.5941	18.4192	27.9004	23.8321
ANGPTL1_1	ANGPTL1		protein_coding	138.052	124.233	11.5551	10.4483	71.6087	68.0763	11.4327	6.37726	7.31498	5.04103	54.9837	29.6945	35.5435	27.1631	53.0611	33.6819	41.8116	46.3808	38.0493	39.4649	28.7681	31.2918	23.4499	25.6623	43.9346
ANGPTL2_1	ANGPTL2		protein_coding	10.364	11.4095	10.8042	7.64525	18.8262	22.6114	4.35441	2.69731	7.57375	6.38852	296.374	259.3	300.101	267.127	269.038	263.121	393.414	223.511	237.515	170.038	145.491	172.388	115.775	155.785	176.636
ANGPTL4_1	ANGPTL4		protein_coding	13.9427	15.4024	31.5839	49.6078	30.5145	38.9645	12.1505	13.1133	8.27131	8.48127	9.30943	6.30733	7.48041	6.83413	6.99502	9.17276	13.3673	5.17973	6.44426	4.78288	7.40839	10.5817	3.94576	6.07905	5.77419
ANGPTL5_1	ANGPTL5		protein_coding	0.292424	0.3313	0	0.139503	0.170127	0.276124	0	0	0.389818	0.328344	57.7559	59.6577	56.5053	48.5635	87.0237	65.4706	93.9841	95.0355	82.7428	82.053	95.4026	85.9399	56.7907	73.5092	93.5403
ANGPTL7_1	ANGPTL7		protein_coding	0	0	0.248791	0.268054	0	0	0.063292	0.224042	7.03816	1.71971	2.87843	2.72142	3.76618	2.29156	1.57317	2.9826	5.79762	5.23527	3.05634	12.3466	4.8715	8.85281	2.63912	3.72889	12.2793
ANK1_1	ANK1		protein_coding	4.99587	3.13156	0.041082	0.089338	4.06792	7.94272	0.044138	0.053068	1.42534	1.29511	8.4724	5.53831	13.7757	6.6303	4.3026	6.03366	6.37844	4.91539	9.24653	4.75372	3.09218	6.07431	5.6309	3.70659	2.07647
ANK2_1	ANK2		protein_coding	18.4181	16.738	6.50569	3.69837	9.53272	9.30616	4.83733	5.29276	1.15827	0.778933	26.4368	16.174	28.6251	14.137	27.7144	17.0218	24.7251	23.1931	13.3107	18.3361	12.8882	17.5906	11.6469	17.0923	9.41502
ANK3_1	ANK3		protein_coding	7.15159	4.35427	18.0714	16.1545	4.05605	7.48426	18.8802	24.2858	3.71662	3.44401	13.4937	12.615	13.7256	14.284	13.8893	13.4403	14.1115	14.524	12.0345	14.1318	12.1513	14.3438	8.89539	12.7111	12.476
ANKDD1A_1	ANKDD1A		protein_coding	1.88092	1.58804	1.00097	1.70295	2.52186	4.75238	2.73408	6.74982	4.86928	4.99617	17.1394	16.389	17.5831	12.7468	12.1294	13.8306	11.9167	12.6015	11.0838	9.24104	7.54332	11.8616	9.38597	12.5829	8.92422
ANKFN1L_1	ANKFN1L		protein_coding	6.27313	6.62229	2.98593	4.49368	13.2037	27.2539	3.82121	5.28989	20.659	28.898	5.23011	6.79628	6.94762	5.53538	7.75122	7.62354	7.31676	6.6387	8.08698	8.42097	5.68703	5.12142	6.93368	7.39291	9.47291
ANKFY1_1	ANKFY1		protein_coding	81.438	74.6793	65.2735	67.3985	67.904	70.2034	61.5186	50.8299	17.7612	14.4642	53.432	54.1712	53.0537	50.9578	59.9627	54.9743	59.5174	50.8791	54.5132	56.632	54.0711	47.0994	44.8798	51.3874	49.2556
ANKH_1	ANKH		protein_coding	26.7845	24.2625	13.3761	29.0786	9.9934	6.97599	54.5354	33.0212	10.1437	16.6363	58.1525	67.7087	53.2698	36.834	48.6549	47.8164	62.4045	50.5183	51.0833	55.3062	64.1044	61.158	46.2198	51.4098	48.8925
ANKHD1_1	ANKHD1		protein_coding	44.5095	43.282	62.3352	65.5271	43.7201	63.3012	56.8543	74.9598	23.7663	27.7909	25.3054	23.9514	24.0161	23.5686	25.1802	23.9266	28.0781	25.4757	27.2045	29.238	30.3044	27.3118	29.5803	29.0214	28.6279
ANKIB1_1	ANKIB1		protein_coding	43.5062	37.8336	44.8223	47.1355	29.9583	37.2011	38.319	38.7033	37.0322	30.7998	24.246	25.5273	24.8949	26.9804	26.8406	27.726	27.4979	26.8863	25.0497	36.923	31.3448	27.7558	32.9509	32.2453	30.9805
ANKK1_1	ANKK1		protein_coding	0	0	0	0.059557	0.016692	0.895045	0.060118	0.065031	16.6958	23.2002	0.030394	0	0	0	0.030364	0	0.099166	0.210292	0.127429	3.89085	5.83865	3.36689	10.685	5.99334	8.22033
ANKLE1_1	ANKLE1		protein_coding	11.4126	9.51055	7.63663	7.47698	5.95059	18.1229	9.34492	29.6252	1.50396	2.1122	8.70959	8.16144	11.1042	9.03013	9.29136	7.76387	9.29893	10.6919	8.96451	11.4906	8.91929	9.31946	8.734	9.52754	7.25927
ANKLE2_1	ANKLE2		protein_coding	58.7633	59.9686	50.2374	51.1493	57.5815	59.8054	63.3415	65.6103	21.8685	21.6879	41.1173	47.0962	44.2103	46.072	41.7359	49.382	44.3161	39.6323	38.1296	46.6543	43.2433	38.7139	46.0872	49.3179	38.3128
ANKMY1_1	ANKMY1		protein_coding	3.69413	2.80072	4.66308	4.38898	3.55587	10.6371	2.2127	6.06574	1.56722	2.09779	8.0908	5.07392	6.66429	6.35114	5.53784	6.67718	8.14148	6.51847	6.67971	7.23573	5.34389	7.93827	3.81341	7.61967	6.25687
ANKMY2_1	ANKMY2		protein_coding	31.5565	29.0172	17.2547	16.3534	25.6908	21.2556	18.1896	17.3572	9.74861	8.41267	36.5644	44.0601	43.1366	41.5092	43.3621	36.3126	43.9352	43.1798	37.3883	38.5806	36.46	43.3603	36.2371	42.9205	36.7795
ANKRD1_1	ANKRD1		protein_coding	0.048404	0.063398	0	0	0.034622	0.045066	0	0	5.4704	4.8974	1.09984	0.965855	2.70275	1.01458	2.36051	0.736586	1.87622	0.373131	0.893749	0.060065	0.085214	0.227363	0.176792	0.201478	0.08038
ANKRD10_1	ANKRD10		protein_coding	31.168	27.0769	19.5196	22.6807	20.8233	47.7797	16.4263	35.4067	3.44686	3.39883	69.4282	72.2545	70.1735	67.1744	68.6623	72.0794	82.0384	64.6966	62.9279	70.4963	51.9634	60.183	50.7211	62.3566	52.0801
ANKRD11_1	ANKRD11		protein_coding	65.9914	66.062	98.9487	106.671	75.5317	112.25	76.0121	111.898	56.1273	61.7765	62.9562	65.9743	62.0418	56.2548	66.6436	69.9312	62.4275	65.582	68.4517	67.2839	68.5347	59.5312	67.6583	71.9367	64.2476
ANKRD12_1	ANKRD12		protein_coding	19.1592	23.2238	6.96258	8.603	14.7429	15.9942	10.36	10.8764	7.7162	8.46901	12.1329	12.3271	12.1753	11.0952	12.8223	11.7535	13.2092	12.3821	12.4203	11.4118	10.4497	10.7436	9.93672	13.3618	10.4515
ANKRD13A_1	ANKRD13A		protein_coding	87.7564	89.2336	81.0758	90.3508	78.5027	68.7316	87.6437	66.1847	26.1537	22.8123	82.2785	87.2673	80.5795	76.5601	89.8929	77.3279	86.7509	83.4134	84.7975	92.618	91.0532	80.1547	80.9145	82.1831	77.8669
ANKRD13B_1	ANKRD13B		protein_coding	7.446	6.51471	1.84143	3.47049	7.36037	12.806	8.39609	16.7829	1.74931	2.09431	4.00011	4.78924	4.65041	5.53637	6.0102	7.44166	4.58227	6.71015	6.90773	8.2103	5.16232	6.38125	4.49133	6.36672	4.97082
ANKRD13C_1	ANKRD13C		protein_coding	41.5315	40.9464	35.4617	38.4245	47.3584	45.7109	48.9492	44.186	27.4531	30.4095	71.8145	73.2057	71.3134	71.144	76.1091	74.083	85.0401	80.2897	85.2768	72.406	71.3893	63.4074	72.9934	81.892	61.9714
ANKRD13D_1	ANKRD13D		protein_coding	15.4686	16.7021	21.1724	31.0671	22.0195	44.4424	21.1457	46.7205	33.6174	36.3877	56.8794	67.3699	62.614	55.5427	62.0827	76.533	58.804	57.6765	66.3096	69.1085	66.2797	75.2561	69.2022	73.1067	65.0077
ANKRD16_1	ANKRD16		protein_coding	3.8028	3.96005	3.99709	5.88529	3.35509	6.03219	3.41765	5.5876	1.5757	1.05011	3.28334	3.78746	5.14651	4.78583	6.70068	3.77389	5.8493	5.58059	6.12043	4.84739	6.77897	5.11566	4.57846	6.06341	4.72745
ANKRD17_1	ANKRD17		protein_coding	79.2077	82.4625	130.872	151.42	87.4531	110.543	108.397	127.561	32.6993	35.2063	38.1094	39.9196	38.7227	38.934	42.7512	40.4252	41.8929	42.013	44.8023	48.6166	49.267	39.6308	49.2988	50.753	44.6673
ANKRD2_1	ANKRD2		protein_coding	0.466249	0.35034	0.789192	1.01357	0.358566	0.950021	0.81638	2.73045	2.28196	2.08664	1.05115	1.39456	3.79998	1.46249	2.11864	2.01661	1.23725	0.78423	1.62963	1.38791	1.84982	0.987168	3.30533	2.02264	1.55848
ANKRD22_1	ANKRD22		protein_coding	0.760189	0.445362	46.5475	56.8214	0.114276	0.362688	15.9324	9.64501	46.2197	31.7964	25.4732	27.2494	21.7721	14.5071	29.0501	21.6448	27.6751	65.0444	46.9829	59.5955	57.9487	48.1794	59.4422	68.6632	63.3351
ANKRD26_1	ANKRD26		protein_coding	9.99819	9.13359	8.1071	10.496	8.74942	17.9935	6.8663	11.1069	2.05618	1.90712	4.40143	4.14995	4.85697	4.49107	5.17563	4.42582	5.52352	4.50899	5.46798	5.99507	5.1089	5.14553	6.59149	5.91514	4.89442
ANKRD27_1	ANKRD27		protein_coding	9.87949	9.68825	9.20498	11.3322	9.35518	12.7572	11.4203	14.8457	6.62464	6.25187	14.9371	14.3694	12.3227	14.2367	13.9168	12.8408	14.8295	15.0047	15.1939	13.2553	12.2674	11.4434	13.5517	14.9074	11.9114
ANKRD28_1	ANKRD28		protein_coding	14.5353	14.4142	21.8874	22.3306	18.5904	26.0764	24.8274	31.9363	13.0896	10.2559	25.8415	25.1225	33.2375	37.5663	28.2591	32.4308	34.9363	36.8938	27.585	35.6305	32.2508	32.2729	27.2852	31.8397	35.9123
ANKRD29_1	ANKRD29		protein_coding	1.00015	0.500864	10.5184	12.343	0.417036	0.15072	7.23452	3.89259	0.70102	0.820155	18.5134	16.52	15.0875	16.5485	19.2356	16.0884	20.5752	25.4343	16.9416	16.3557	27.3195	16.2434	18.0116	16.0633	16.9401
ANKRD34C_1	ANKRD34C		protein_coding	4.12182	1.87034	0.051982	0.122418	0.517071	0.862841	0.112462	0.11774	0.033774	0.029331	0.017598	0.102654	0.18142	0.142003	0	0.089239	0	0.235515	0.082937	0.051948	0.079392	0.048211	0.088802	0.015298	0.071375
ANKRD39_1	ANKRD39		protein_coding	10.3444	13.9232	17.2297	26.9414	15.9717	36.9568	16.3259	44.2047	9.14196	10.499	62.9046	47.3103	59.6899	53.3641	49.6878	63.0314	51.7017	47.0863	56.95	57.9715	60.4504	73.7855	43.64	57.8701	47.4033
ANKRD40_1	ANKRD40		protein_coding	7.09483	6.34887	7.50539	8.2202	7.97644	9.09368	6.39726	8.79919	2.1061	2.41194	8.28604	9.10062	9.00524	10.3333	10.5071	10.3075	8.13858	7.2191	7.4464	9.85784	8.63458	10.2649	7.47498	8.40353	8.74244
ANKRD44_1	ANKRD44		protein_coding	72.0672	74.3517	26.3114	27.158	34.1508	43.0536	27.893	33.3909	13.9996	14.2442	24.2325	24.1881	25.1705	24.2665	26.4404	27.7259	28.3103	28.3296	31.9912	28.58	33.1644	23.1794	24.4918	28.2376	23.0939
ANKRD46_1	ANKRD46		protein_coding	48.1859	40.1037	27.033	25.0826	49.8358	43.1804	29.7745	28.4923	13.3098	9.27448	46.3276	54.0453	56.2448	52.6282	56.7885	57.1562	62.3643	54.5928	53.5514	53.2905	47.1702	49.2239	47.0002	49.7436	44.3853
ANKRD49_1	ANKRD49		protein_coding	19.3005	17.8512	16.4313	19.5807	25.795	20.2437	25.4551	19.0229	11.1446	8.81983	20.7737	24.5131	19.8354	24.1134	20.9155	26.3804	22.8905	31.1607	26.1678	22.012	25.5992	23.1894	25.1593	24.7966	24.611
ANKRD50_1	ANKRD50		protein_coding	64.4856	58.9824	55.6854	73.14	50.7948	52.3408	58.7064	44.1982	17.4163	14.5237	50.3996	50.7854	59.303	47.3294	53.7884	53.4063	53.2348	49.5707	49.3083	46.6379	42.381	48.4674	36.3628	48.7461	43.9777
ANKRD52_1	ANKRD52		protein_coding	44.8064	42.0831	43.5152	45.5788	30.0511	37.5965	40.6733	46.9205	14.2448	15.4027	15.4689	17.6123	17.7517	17.58	16.2983	17.2744	21.1576	17.5925	20.9245	20.2063	19.6146	14.4069	20.3688	20.7413	17.4507
ANKRD54_1	ANKRD54		protein_coding	36.807	34.634	36.8514	31.9336	37.4396	41.5341	34.0089	39.5858	18.8724	18.8658	49.2812	51.482	47.3889	50.3022	52.6726	55.5225	50.8849	48.0166	51.5761	53.3797	50.1268	54.4547	55.5634	53.4323	50.7264
ANKRD6_1	ANKRD6		protein_coding	10.0646	8.7534	5.10549	5.99104	5.40682	5.69557	9.5057	9.76855	8.36128	8.83686	7.55497	7.26348	8.34974	6.32741	7.07461	7.36345	6.925	7.16999	8.14286	9.60605	11.5389	11.8052	13.1701	12.8981	12.5384
ANKRD60_1	ANKRD60		protein_coding	0.381281	1.26672	0.370795	0.7988	0.173855	3.03395	0.49165	1.91968	0.357335	0.09276	0.435822	0.702948	0.512569	0.483503	0.61968	0.585635	0.450405	0.657785	0.786952	0.485163	0.544211	0.531171	1.23385	0.470973	0.384228
ANKRD66_1	ANKRD66		protein_coding	0.264523	0.344688	1.4768	3.52009	0.439639	0.958679	1.73339	4.66061	0.916397	0.840816	1.27633	1.00475	1.4226	1.83961	1.14404	0.552085	2.32814	1.23104	1.88099	1.712	1.85371	1.76359	2.54748	1.83727	1.50988
ANKRD9_1	ANKRD9		protein_coding	1.97172	1.74327	3.93465	4.55124	1.98399	2.81304	2.53619	3.02106	4.3124	8.03167	12.9102	10.1126	12.8272	14.2291	11.1226	12.0191	9.53257	11.0241	10.1872	10.3674	9.95196	10.7108	13.5417	14.0177	13.9854
ANKS1A_1	ANKS1A		protein_coding	22.1817	18.3446	27.0824	29.5055	19.1372	24.3673	24.0573	25.8721	9.67401	8.54113	14.6537	12.5852	13.553	13.0787	13.2302	16.9345	20.0993	12.9811	19.9202	13.3689	9.88345	10.9211	10.6769	11.5683	10.7287
ANKS1B_1	ANKS1B		protein_coding	2.22836	1.17694	2.78522	3.64165	2.45528	1.93027	2.32359	6.61442	2.66906	1.82138	2.96377	2.78605	3.46544	3.63656	3.31466	2.99399	3.33813	3.05109	2.90595	2.30945	1.77439	2.6077	1.40426	2.09187	3.60224
ANKS3_1	ANKS3		protein_coding	11.5065	11.504	11.1828	11.4731	12.3861	17.8003	10.958	15.0772	4.89448	5.47666	17.4899	20.2694	16.7099	19.8905	20.2072	22.0228	18.0924	18.8811	21.0396	19.4896	13.9721	16.9992	18.3253	20.2106	17.788
ANKS6_1	ANKS6		protein_coding	8.77753	7.04299	9.36336	8.78884	9.14683	11.7077	6.49143	7.30587	3.10021	2.99089	17.4687	15.1427	16.2349	17.3679	16.8971	15.3789	16.5791	15.1636	14.5728	14.2763	14.0823	14.7427	12.2036	14.2938	10.4874
ANKZF1_1	ANKZF1		protein_coding	10.5656	10.6462	18.3728	21.6177	12.7113	12.6512	15.3299	19.5216	10.1311	10.7923	14.4955	13.1393	13.6838	14.1789	15.3896	17.084	13.5981	13.0117	14.0218	17.0352	15.3911	17.9781	17.0592	17.5742	15.7245
ANLN_1	ANLN		protein_coding	101.536	100.182	43.1812	45.5675	71.6594	55.5812	91.2417	97.0899	9.67559	7.18779	98.3485	121.157	116.554	107.979	129.458	99.4937	121.787	125.233	80.2127	106.238	81.1125	78.3134	86.3721	79.0483	81.7307
ANO1_1	ANO1		protein_coding	0.772964	0.761746	0.069481	0.170458	2.90106	3.67857	1.22981	1.02179	11.4917	10.1507	11.9278	11.1721	13.3763	12.3696	11.0702	9.42117	12.3284	10.2584	9.50309	9.08695	9.8766	9.74042	11.8668	14.2674	14.8801
ANO10_1	ANO10		protein_coding	17.5065	17.3778	10.1945	10.89	20.5899	22.1069	12.0489	9.99325	7.84128	7.19454	27.3045	29.3225	32.318	27.1915	28.772	29.7475	26.304	27.2494	26.7113	25.5848	18.3878	28.1525	21.179	23.6616	24.7274
ANO3_1	ANO3		protein_coding	5.14198	3.37499	0	0	9.11952	8.075	0.221968	0.272055	0.798706	0.487699	2.08768	2.39754	3.26032	2.48868	2.59009	1.53802	2.61372	2.20643	1.73517	4.00141	1.22152	1.63166	2.56793	2.47038	1.48131
ANO5_1	ANO5		protein_coding	56.2806	49.6586	31.687	29.6389	51.1927	42.9847	20.0643	18.3243	11.3792	8.54124	75.1866	80.3418	82.3913	87.4906	97.7606	78.2056	109.132	90.2328	90.8551	83.0745	69.135	76.4706	62.9872	75.1432	66.975
ANO6_1	ANO6		protein_coding	1.47841	1.71462	5.75544	7.04854	4.46841	9.84927	2.73824	3.6268	0.883001	0.594668	42.5797	47.2747	49.1773	44.2927	55.373	63.7488	56.4609	48.5206	40.2507	52.8022	51.1436	45.8017	23.6521	36.3544	36.7803
ANO8_1	ANO8		protein_coding	7.03053	7.3219	0.819478	0.559972	7.26166	12.7459	0.700465	1.12151	1.68064	2.40692	13.118	11.2173	15.1115	14.4995	15.6297	19.4421	16.7345	17.9657	17.9557	10.9626	13.7492	10.329	12.1671	12.8161	7.45169
ANO9_1	ANO9		protein_coding	0	0	0.054811	0	0	0	0	0.044206	0	0.001424	10.104	9.46376	9.8665	7.97168	10.1359	13.0214	6.57994	9.22862	10.5844	6.10252	5.04544	6.88669	4.83706	7.30452	4.62441
ANOS1_1	ANOS1		protein_coding	16.7514	33.2668	61.4462	65.219	13.7519	23.667	39.4381	44.5959	12.9389	11.6213	9.93514	9.43719	11.7257	9.93815	8.91188	8.70836	12.4851	13.6171	14.1503	12.9243	12.1221	12.2666	9.06609	13.2289	12.9298
ANP32A_1	ANP32A		protein_coding	215.59	209.862	190.547	196.466	201.667	189.778	231.528	200.827	86.1714	72.0424	103.027	108.295	105.928	91.5463	97.3737	82.5618	106.305	107.508	117.741	127.182	135.224	110.479	128.378	86.607	103.782
ANP32B_1	ANP32B		protein_coding	376.338	362.376	386.986	389.861	310.589	260.365	426.797	371.219	77.2282	82.5949	164.048	185.947	162.965	188.834	174.807	170.506	173.841	190.37	190.475	236.552	254.229	218.371	229.628	222.365	200.465
ANP32E_1	ANP32E		protein_coding	264.245	232.377	214.297	224.957	252.312	172.358	485.791	324.316	64.9852	51.3092	224.153	240.736	231.397	241.917	243.023	203.478	291.313	286.331	303.88	377.752	367.623	308.944	355.354	353.518	301.409
ANPEP_1	ANPEP		protein_coding	9.97353	9.11023	0.496801	0.261921	11.5623	13.3038	0.995006	1.2873	2.58388	4.08583	38.5119	30.7462	35.3786	30.1719	30.5514	38.9443	25.0539	26.9028	25.8842	26.4355	18.5743	27.5204	14.0648	19.215	20.7939
ANTXR1_1	ANTXR1		protein_coding	103.972	101.448	18.2693	24.7795	130.089	142.051	8.89657	6.65418	12.2968	8.39452	32.7099	26.1985	26.9891	22.5298	31.1406	27.6588	30.9736	29.3797	32.6605	30.0967	25.1931	25.8047	17.8291	25.3751	24.3248
ANTXR2_1	ANTXR2		protein_coding	60.6625	57.8756	20.9985	22.3587	115.106	130.655	10.8785	6.445	10.6296	9.28436	210.332	182.681	196.255	181.425	168.911	190.732	172.652	163.872	158.477	121.635	103.517	131.152	73.9983	108.707	117.617
ANTXRL_1	ANTXRL		protein_coding	35.1685	33.7979	80.6196	72.5305	28.1835	40.6225	53.2268	50.4317	10.0101	7.56086	41.6623	45.3946	45.6892	38.4409	43.3953	44.4534	42.3451	40.2404	48.0331	43.3022	37.4411	39.0911	32.8474	36.9067	34.1572
ANXA11_1	ANXA11		protein_coding	22.5719	18.7786	27.7846	32.019	32.7146	31.6822	30.1092	25.2343	17.0737	12.4055	289.668	296.885	283.153	279.406	283.437	265.786	274.628	268.511	243.47	188.598	180.037	196.298	140.8	175.679	175.184
ANXA2_1	ANXA2		protein_coding	82.4282	69.7468	735.114	764.949	58.7221	72.7017	675.387	847.327	625.276	474.246	1936.29	2078.91	1670.58	2044.93	1779.05	1719.88	2020.13	2067.82	1590.36	1609.07	1691.2	1592.51	1312.09	1286.23	1463.7
ANXA4_1	ANXA4		protein_coding	42.456	38.7408	33.1074	37.2216	35.444	33.72	29.1856	34.2154	39.7814	37.4309	227.809	238.542	239.414	219.806	233.512	240.792	222.651	248.009	220.688	183.373	190.005	191.678	178.062	191.385	187.325
ANXA5_1	ANXA5		protein_coding	163.941	193.852	46.7357	62.5776	236.046	180.693	50.8846	24.086	34.5486	21.6144	874.752	867.871	836.535	918.339	954.142	799.898	843.341	808.95	763.207	738.047	602.049	643.856	404.26	488.228	551.88
ANXA6_1	ANXA6		protein_coding	236.833	288.999	10.0358	7.42332	203.848	232.445	13.7151	9.76358	32.7358	25.6206	404.123	391.867	431.149	361.288	378.078	356.19	358.855	312.542	305.584	306.674	250.243	307.297	185.681	207.056	255.425
ANXA7_1	ANXA7		protein_coding	13.7676	17.2546	32.4423	36.7187	18.1332	18.5919	32.0967	27.083	23.8297	19.5845	172.57	179.373	172.191	166.105	181.104	180.13	187.345	170.059	151.453	119.153	125.386	139.322	109.002	129.147	131.709
ANXA8L1_1	ANXA8L1		protein_coding	7.81395	1.93738	175.501	174.808	0.802508	1.58473	158.345	209.684	54.1387	31.0333	386.622	357.285	374.063	303.611	257.936	305.104	304.914	352.164	276.361	199.494	188.784	206.699	173.562	212.208	202.119
AOAH_1	AOAH		protein_coding	0.603756	0.849614	1.09691	1.41217	2.98925	4.96218	0.14237	1.32033	0.657368	0.382157	25.7631	33.8913	26.0741	24.8624	26.8877	44.2081	28.1304	21.6944	30.9552	20.3409	16.5923	25.7024	19.5708	22.4437	13.4551
AOC3_2	AOC3		protein_coding	1.23459	2.77675	0.580071	0.903429	4.69851	13.6454	2.18177	6.16775	3.4834	4.50035	28.8787	28.5182	32.7214	29.1659	25.4575	32.2208	24.8781	19.8926	21.1325	23.1261	19.7524	26.3208	17.5379	17.7268	25.1878
AOX1_1	AOX1		protein_coding	1.60419	0.830823	0.226938	0.39708	0.574272	1.90005	0.899342	1.95268	0.132867	0.155769	6.04898	4.99761	4.40437	3.84035	6.40296	4.18832	5.11844	4.57822	6.08432	3.37496	2.7837	7.55446	2.85262	4.75929	3.02547
AP1AR_1	AP1AR		protein_coding	19.8215	18.253	24.9652	26.7012	11.0017	12.1843	53.2534	41.1281	13.884	12.8818	29.6918	27.8275	28.0894	26.3596	28.2413	24.7249	32.0281	30.4883	31.7851	34.8857	33.6897	32.3514	31.1403	36.211	29.2886
AP1B1_1	AP1B1		protein_coding	78.4753	76.103	51.08	54.17	61.2039	59.9525	47.5563	53.9129	22.4531	24.3245	38.0838	37.4856	40.1707	36.4373	38.7727	39.3413	41.0495	34.1707	37.3336	42.361	41.1426	39.2838	35.2106	32.2181	36.9253
AP1G1_1	AP1G1		protein_coding	96.7534	94.5341	109.895	116.621	89.6701	109.188	114.205	125.829	41.2802	36.2401	93.5613	101.015	95.8248	94.7181	96.1254	100.771	103.402	98.2279	96.8961	105.982	102.462	96.5556	101.466	105.921	93.3798
AP1M1_1	AP1M1		protein_coding	71.582	72.3699	58.2316	60.7057	59.3366	40.3103	80.5363	50.4195	27.0039	21.3082	56.9849	58.7617	56.7995	61.2808	63.0694	57.1388	64.3738	65.0335	64.8553	65.9017	64.7838	64.0748	70.7029	78.5247	60.3927
AP1S2_1	AP1S2		protein_coding	39.0486	40.6238	7.86318	8.33982	29.4375	27.032	15.3047	10.3141	6.28707	4.29639	46.8407	45.9133	46.5382	42.6586	46.7804	40.5974	51.2752	50.2521	45.3453	45.8556	43.1191	36.5701	34.173	42.9238	37.1429
AP1S3_1	AP1S3		protein_coding	6.40569	1.26113	225.853	177.427	0.639635	1.64054	53.2626	35.8282	27.4193	31.1692	2.16104	1.15458	1.45244	2.20154	1.1237	1.75063	3.51662	3.24571	4.9997	10.449	8.11869	8.21395	18.6047	11.5349	16.4482
AP2A2_1	AP2A2		protein_coding	125.768	124.897	73.5142	72.3902	119.78	113.59	89.3234	78.4845	35.8605	35.4934	83.631	83.9373	93.1459	86.4309	88.5055	74.9145	91.4768	86.8491	85.9399	96.1461	105.756	86.8515	78.7737	85.2142	80.9794
AP2B1_1	AP2B1		protein_coding	80.2024	77.8467	68.6973	74.2614	81.7814	95.7564	72.3176	86.3085	27.259	29.6041	45.8085	39.2	41.7152	38.196	39.0177	34.7213	42.3998	40.9097	39.6488	55.3877	47.8308	42.6988	39.0622	35.9388	40.2998
AP2M1_1	AP2M1		protein_coding	348.877	329.288	214.123	220.216	304.372	288.615	224.975	198.963	101.106	96.2392	410.229	422.24	413.085	396.652	439.313	383.394	411.897	388.461	366.017	390.048	387.404	352.735	301.768	312.535	326.561
AP2S1_1	AP2S1		protein_coding	122.841	127.78	106.509	117.997	96.0524	87.1758	98.948	104.592	66.9727	50.9389	150.542	158.062	149.412	161.148	172.497	166.043	146.301	157.479	165.724	174.506	173.323	159.431	158.411	160.408	160.754
AP3B2_1	AP3B2		protein_coding	12.3893	14.2751	4.94004	5.89925	14.0053	22.7495	3.6581	5.282	0.763891	0.835852	3.95921	3.14285	3.48533	3.55471	3.04282	2.98798	3.09052	3.81921	3.51403	3.83287	2.09909	3.14764	2.26334	2.99622	2.60829
AP3D1_1	AP3D1		protein_coding	92.6941	87.8136	82.5182	86.823	83.8771	98.2555	87.5099	84.3467	21.1276	21.1162	48.3697	51.2332	48.0866	47.481	55.2359	57.7837	57.6152	46.9407	51.6527	56.6337	51.5505	48.6957	45.8669	46.4117	46.5454
AP3M1_1	AP3M1		protein_coding	139.119	140.061	90.7268	92.6561	109.113	100.543	92.4093	68.7686	28.8902	27.6921	114.844	119.673	116.297	114.508	115.936	107.636	118.301	114.212	123.6	124.182	129.614	109.107	113.776	110.141	102.525
AP3M2_1	AP3M2		protein_coding	46.971	44.656	50.1274	50.3821	40.0556	46.7208	48.55	49.2101	21.8073	22.5121	59.7838	56.4569	61.8269	53.4169	52.2571	50.0882	53.6302	59.1382	59.7967	60.4544	57.1088	55.6891	57.2746	57.6725	52.3667
AP3S2_1	AP3S2		protein_coding	55.9044	56.1702	52.9283	55.0944	45.7965	63.9178	50.0603	61.116	21.2595	17.7957	69.1384	60.6921	76.7983	62.4539	62.6473	81.2392	68.2647	64.8434	66.4194	75.0148	66.5507	72.0743	58.6362	63.0598	61.7398
AP4B1_1	AP4B1		protein_coding	15.796	15.1342	16.9622	19.9612	14.6466	13.9054	22.682	20.1969	12.249	10.147	21.673	20.3771	20.1007	21.1793	20.4103	25.5623	20.2156	20.6797	22.8815	26.2357	22.506	25.1936	25.1021	22.6318	26.2193
AP4E1_1	AP4E1		protein_coding	15.0842	13.7643	14.5769	17.5592	13.8563	21.3112	14.9788	22.7085	7.55145	6.93989	15.5342	13.0486	13.332	14.0486	13.3853	12.5276	17.406	15.2786	17.0906	14.7175	15.9158	17.1885	17.9518	16.7712	15.8702
AP4S1_1	AP4S1		protein_coding	8.36825	7.01769	5.34763	4.78904	6.12884	7.88737	5.15796	4.94527	5.03122	4.57278	9.12566	10.708	9.76275	9.66192	10.1103	10.3162	8.7703	9.945	10.6842	11.7382	9.45203	7.77876	10.0092	8.18898	10.8633
AP5M1_1	AP5M1		protein_coding	50.9293	45.9183	22.8173	23.3161	34.9548	32.4225	25.3566	17.7697	5.70686	4.74345	18.0274	18.0281	18.561	20.247	19.3396	19.2931	16.9799	22.5423	17.6339	23.2435	21.7797	20.4866	15.7999	18.4064	14.0897
AP5Z1_1	AP5Z1		protein_coding	13.1105	14.8104	18.7404	19.5645	13.626	19.856	17.1138	26.3961	6.17732	5.83278	21.2456	18.1118	18.7125	19.6758	20.2865	19.296	18.2744	18.9136	18.9892	22.0763	23.7984	21.4959	19.8543	18.8871	18.7092
APAF1_1	APAF1		protein_coding	9.67932	8.6241	13.9638	15.5724	7.79724	8.94522	13.1626	9.30285	3.73153	3.02282	9.15762	10.2668	7.15825	8.55825	8.54161	7.62857	9.11326	10.0133	8.79256	9.13437	11.4593	10.1003	10.266	10.6243	8.45425
APBA2_1	APBA2		protein_coding	10.991	12.0674	3.23619	3.81445	16.6377	17.5958	10.8443	14.0521	0.631534	0.745056	2.08239	2.22564	2.50792	2.60125	2.38042	2.12082	3.65945	3.73787	3.65687	3.83473	4.26891	3.66859	4.47201	5.21777	3.65465
APBA3_1	APBA3		protein_coding	14.2639	14.4171	13.7639	14.735	10.3324	16.8016	13.2045	19.3752	5.00913	5.0696	11.73	10.0215	10.7005	10.2301	10.5219	10.7234	11.0749	10.3269	10.8911	11.6851	11.3721	12.6385	10.1908	10.0028	10.5601
APBB1_1	APBB1		protein_coding	25.5353	25.222	22.9076	24.1031	26.6348	44.1678	21.8432	32.7119	9.51345	9.91608	32.6827	34.3214	37.5302	33.4485	35.1426	36.9324	34.6875	34.3091	31.9241	36.9236	30.2969	35.5693	29.1457	31.542	32.9547
APBB1IP_1	APBB1IP		protein_coding	8.38655	5.95219	0.10257	0.226018	6.30559	3.14181	0.13149	0.022434	0.330103	0.345544	7.70718	8.23354	8.18885	4.68002	6.31403	6.91934	6.02213	6.69626	7.51962	7.14611	10.2162	6.56105	3.8856	5.08339	4.28268
APBB2_1	APBB2		protein_coding	30.8626	24.0574	23.6576	24.4987	40.876	41.3862	28.4399	22.8789	6.74577	6.27787	28.8447	35.0774	34.5133	33.4832	35.808	34.0562	32.1971	33.2166	27.8544	35.2543	26.6508	29.5819	24.4375	31.9074	31.7061
APC2_1	APC2		protein_coding	0.996092	0.533612	1.68676	0.435528	1.56238	3.43741	0.291798	1.06883	2.16604	2.56959	3.14511	1.31603	0.609158	1.5703	1.57743	4.48784	2.39201	1.56402	2.54977	1.85807	1.21064	1.3165	1.17171	2.59667	2.73729
APCDD1_1	APCDD1		protein_coding	854.799	949.715	438.882	358.376	390.801	450.601	177.887	130.024	26.2949	27.6056	92.9183	99.3684	103.054	90.1926	85.8807	104.493	93.2595	118.289	111.62	143.342	138.782	124.141	107.584	123.2	136.658
APCDD1L_1	APCDD1L		protein_coding	0.077099	0.119532	0.445958	0.427688	0.657573	0.863343	5.54895	3.39614	4.02318	3.05771	25.1238	21.9159	28.2146	19.1465	14.9275	19.7411	18.3525	17.1235	17.73	10.0006	8.76176	11.9933	6.95453	10.0959	8.19659
APEH_1	APEH		protein_coding	23.8858	21.8796	33.2647	36.2375	15.8009	25.349	24.1267	35.6975	23.9005	26.599	25.1522	22.079	22.6496	20.4962	25.5731	24.6354	25.3836	27.1911	26.5542	27.4814	25.6474	28.7309	25.9874	24.9073	26.9827
APELA_1	APELA		protein_coding	3.77515	4.74939	0.804505	0.285047	11.2161	5.107	0.236733	0	1.23508	2.04428	0.399743	1.04305	0	0	0.568099	0.401429	0.680973	1.13379	0.67955	0.559004	1.04254	1.18446	0.784712	1.18021	1.60004
APEX1_1	APEX1		protein_coding	33.2624	38.1179	48.7891	60.7798	29.0441	44.7822	47.7474	63.5041	13.0079	10.0471	14.7803	17.4184	13.7555	17.0176	15.4468	16.4615	15.0281	18.6367	15.6183	25.7929	25.0166	20.8823	26.1401	24.1604	21.5887
APH1A_1	APH1A		protein_coding	19.4407	22.0614	34.7953	38.8753	22.2533	30.2103	29.8336	37.6844	14.9934	12.0012	37.0732	32.788	40.506	38.4832	39.7856	43.0693	33.0048	34.1688	42.4983	43.5834	38.6971	43.678	35.3174	35.3134	37.7849
API5_1	API5		protein_coding	146.24	136.088	130.482	123.664	142.955	118.112	155.615	115.706	65.8996	57.9646	135.791	149.767	146.908	140.726	149.755	136.331	160.542	151.614	155.588	156.677	156.86	147.957	152.041	158.326	134.033
APIP_1	APIP		protein_coding	11.1907	9.2373	15.8086	16.6407	11.103	10.2512	14.7421	12.7382	6.65951	6.66825	19.5659	22.61	21.501	20.2541	20.3301	18.421	20.8219	22.958	23.9213	21.0873	19.5757	22.7313	23.1057	22.7772	17.4119
APLF_1	APLF		protein_coding	10.3042	9.20706	12.7324	12.6632	10.5179	11.5003	12.9682	12.5345	5.33779	4.84308	20.0229	14.6844	19.573	15.8532	16.2398	12.8282	19.0215	22.4208	22.608	19.2939	20.6684	19.2851	16.0975	17.1962	13.0374
APLN_1	APLN		protein_coding	3.00623	2.31757	0.231752	0.149168	3.38015	3.88731	0.086768	0.17374	0.256042	0.27247	7.39878	8.44385	8.06127	11.5859	10.4503	10.1817	3.33447	4.58439	5.66417	5.26422	3.88281	3.90703	3.48126	3.23784	5.20365
APLNR_1	APLNR		protein_coding	11.7918	13.4135	0	0.254942	18.9815	21.7031	0.114043	1.65867	3.76661	4.41336	19.4826	21.0769	14.9204	22.6163	25.6881	26.0369	19.4851	18.3611	18.4155	18.6645	15.2173	13.6485	14.9506	13.1692	14.5028
APLP2_1	APLP2		protein_coding	181.623	157.142	233.648	232.788	163.107	162.215	206.094	162.772	113.791	112.355	393.251	360.693	439.659	355.025	359.719	385.946	394.272	337.967	338.489	334.92	316.932	340.435	235.841	267.675	306.39
APMAP_1	APMAP		protein_coding	53.8843	65.3177	47.0194	56.7125	69.4589	78.3299	45.1624	47.9084	28.8635	26.4715	174.685	177.136	176.44	187.352	183.733	208.065	190.818	175.063	205.323	166.208	155.517	170.999	122.32	145.441	141.252
APOA1_1	APOA1		protein_coding	2.15191	4.39851	0.061659	0.247863	15.3738	25.8419	0.42699	0.649548	19.481	20.742	3440.82	2306.06	3853.45	2124.61	2087.28	3985	1705.58	1189.4	1195.07	1190.01	1009.55	1931.36	549.232	1308.96	1353.79
APOA1BP_1	APOA1BP		protein_coding	73.074	71.9565	52.2342	45.6907	89.6332	95.455	67.3041	60.1902	42.292	39.1391	88.0605	82.8447	93.8862	83.1518	109.452	103.428	95.4063	86.8208	102.271	101.611	76.355	100.172	76.1831	78.9035	88.8428
APOBEC2_1	APOBEC2		protein_coding	3.04576	1.32987	0	0.039852	0.761897	1.25746	0	0	0.892026	0.493186	31.4137	38.6845	40.336	24.4717	16.058	18.5444	19.822	17.3351	14.3875	13.1609	5.40783	17.1204	9.43074	15.3153	16.5566
APOD_1	APOD		protein_coding	0.056467	0.238407	1.48871	2.91985	0.400384	0.904166	2.20797	2.37784	158.611	333.273	3.21453	4.68308	4.81837	5.17695	7.30932	3.92682	3.18867	3.2647	3.06785	17.8154	44.9897	32.5397	138.73	65.8571	110.096
APOH_1	APOH		protein_coding	1.15867	3.33163	5.17283	40.3612	0.368167	0.321361	78.7284	24.8546	0.294838	1.12122	1.03198	1.28378	1.74959	0.413005	1.02881	0.908341	1.50126	1.40937	3.35131	5.90875	3.96705	8.18532	0.652151	0.805414	2.59376
APOLD1_1	APOLD1		protein_coding	2.76328	2.64955	0.079716	0.032298	3.25355	9.13207	0.227192	0.158905	0.999009	0.843279	10.9064	7.57216	8.58307	9.50782	12.0991	9.33351	13.021	7.75178	12.3885	5.32192	5.50364	3.59982	10.7092	9.3823	5.2496
APOO_1	APOO		protein_coding	50.8936	39.977	56.3404	47.6198	39.9629	31.8546	58.3014	68.5619	19.8889	12.2921	54.806	62.4904	49.6602	60.3648	45.5306	50.7353	57.7411	47.8076	60.4545	57.3432	61.2805	63.9835	62.9744	66.7047	51.4807
APOOL_1	APOOL		protein_coding	37.0932	30.6261	44.311	39.3683	35.9309	41.0832	40.5305	49.3057	17.5282	15.2736	48.4951	49.9793	48.4749	46.2834	45.9137	40.5799	51.6481	51.1591	50.7283	49.3304	45.2161	41.4298	40.5976	54.4457	37.0302
APOPT1_1	APOPT1		protein_coding	12.8758	14.862	17.5168	18.5346	9.16168	8.39275	18.9341	13.2703	9.07323	6.38301	22.8081	25.4966	24.376	22.3962	26.9571	17.4208	27.5134	13.8128	23.4292	15.8625	31.67	30.2598	17.084	29.6917	23.9411
APP_1	APP		protein_coding	745.155	644.758	540.918	625.723	677.119	695.148	450.687	387.787	226.121	205.248	358.404	335.892	358.967	315.96	345.743	317.009	383.005	331.895	363.608	369.909	326.236	347.599	263.287	284.681	336.193
APPBP2_1	APPBP2		protein_coding	100.473	108.783	61.6702	60.9075	69.8197	66.7742	66.5871	51.4686	35.9402	27.2978	30.7227	35.1228	36.3647	32.3212	36.3311	29.235	34.2255	33.7424	35.4255	40.7438	40.2007	39.2176	43.8449	43.3236	40.7414
APPL1_1	APPL1		protein_coding	27.846	29.6904	15.2753	18.6016	25.8386	25.8745	18.4067	20.4368	25.194	17.7615	44.8459	48.6899	45.4609	46.0384	50.4979	51.0826	54.8442	48.2575	56.7634	49.7833	50.0404	44.8738	56.3333	60.5292	45.6045
APPL2_1	APPL2		protein_coding	30.8314	29.6671	15.5653	16.096	29.6653	35.9241	18.2999	20.1087	24.3233	23.9287	68.6185	67.3908	70.3482	68.4049	70.5611	75.8317	71.4856	68.8526	64.3099	57.6651	62.1718	56.6619	57.6029	60.5868	56.6049
APRT_1	APRT		protein_coding	27.8383	28.7421	36.4491	33.1294	30.8523	32.1365	31.0507	31.8736	8.92085	8.22441	25.0798	29.0138	25.0531	31.8226	30.3901	30.7608	35.8791	33.1271	39.0709	42.7763	40.0106	36.7111	35.2162	36.59	31.7146
AQP1_1	AQP1		protein_coding	27.3798	31.5182	0.476411	0.127804	96.8024	61.3987	1.80592	0.354038	26.6445	27.1199	377.527	355.681	358.752	383.544	257.749	374.931	260.096	294.099	292.132	185.916	213.696	212.627	180.039	238.639	150.396
AQP11_1	AQP11		protein_coding	0.782184	0.517739	2.41213	4.55351	1.15458	1.71089	4.04362	4.54048	1.27127	0.615674	1.96127	2.6776	3.08684	1.87598	2.52154	2.10831	3.76452	4.2648	4.56788	4.18587	4.01423	3.78043	5.0067	4.34972	4.69269
AQP4_1	AQP4		protein_coding	0.305128	0.031392	0.478417	0.148409	0.629084	0.095452	1.09141	0.512194	0.418092	0.401507	3.58715	3.30593	3.92035	2.21684	3.32585	2.75217	2.95567	3.60915	3.92598	2.63663	2.00474	2.23489	3.1563	4.67873	3.38465
AQP9_1	AQP9		protein_coding	1.00492	1.05987	0.0664	0.072342	0.439219	0.215786	0.083732	0.152962	0.195111	0.061349	9.87968	14.7897	11.2655	14.7395	16.7228	20.511	21.3199	18.8351	20.3054	15.2678	11.8064	21.1481	18.7457	18.916	14.7585
AQR_1	AQR		protein_coding	60.7033	59.285	72.2308	68.5424	59.6727	58.0556	78.5665	67.9035	17.4056	17.1816	23.1735	27.9974	25.1255	28.697	26.052	25.0946	31.4603	28.8194	29.0277	30.3688	32.1343	28.9942	32.3088	34.0949	27.415
ARAP2_1	ARAP2		protein_coding	3.28621	1.82629	33.2424	40.5985	1.55529	0.97933	22.0294	25.4435	15.9948	11.539	8.48451	9.62111	9.13756	9.44357	9.67296	8.73686	12.7231	13.1369	14.9444	14.7253	19.5058	13.5272	18.9898	20.3206	14.0653
ARAP3_1	ARAP3		protein_coding	13.2963	14.4561	0.074214	0.171077	19.4707	23.0382	0.067903	0.044921	2.54838	3.12699	22.6086	23.4804	24.0507	25.2253	31.9954	29.445	23.9129	22.5984	26.9636	24.0219	20.1561	21.0513	17.3453	18.828	20.2401
ARCN1_1	ARCN1		protein_coding	207.588	192.314	141.871	135.448	149.057	144.79	144.427	120.744	58.1387	51.8041	178.647	189.603	178.157	160.303	183.337	176.997	167.629	158.968	169.928	173.595	166.954	157.632	151.013	147.053	152.621
AREG_1	AREG		protein_coding	3.84376	0.95332	3.13917	4.11606	0.160246	0.110005	3.60409	8.60781	62.5064	62.6239	18.7206	12.7378	14.3178	17.6503	16.5302	18.1113	16.4149	19.8384	19.1789	25.3029	35.0109	26.6266	40.5831	39.5394	38.1549
AREL1_1	AREL1		protein_coding	17.2232	15.9501	23.0968	23.4542	19.4558	29.3934	20.3127	26.5277	9.49431	10.1038	19.8524	21.9366	20.6765	22.3032	24.3864	19.4226	22.8968	21.251	23.2659	24.4289	21.8375	21.2759	27.5675	25.371	20.0432
ARF1_1	ARF1		protein_coding	617.811	645.732	540.716	523.53	462.431	381.589	565.986	394.505	289.357	203.835	759.587	763.387	750.968	704.24	667.834	629.09	755.058	725.047	676.821	697.005	641.79	654.048	631.051	699.984	596.036
ARF4_1	ARF4		protein_coding	463.272	436.469	259.824	260.02	299.954	234.813	321.49	201.183	89.3236	67.0307	373.814	403.734	383.721	356.761	403.703	329.928	365.863	338.499	383.888	350.797	338.84	347.417	305.159	319.182	325.303
ARF5_1	ARF5		protein_coding	53.0403	53.5179	47.6369	56.0495	53.6078	48.3621	31.2415	29.2643	11.9049	14.8565	13.3926	12.8752	13.027	18.9586	20.8569	16.8134	19.2277	20.2704	17.8513	23.2813	28.1363	23.895	24.166	22.2169	21.2586
ARF6_1	ARF6		protein_coding	180.943	177.848	189.543	206.262	149.371	151.459	219.299	220.388	286.539	294.346	156.532	170.426	164.322	174.441	188.184	195.236	185.016	193.705	202.126	217.24	240.144	205.484	247.665	216.541	245.72
ARFGAP1_1	ARFGAP1		protein_coding	47.2718	48.4822	44.4299	42.2426	48.6184	42.1256	45.0681	36.104	14.9847	8.35929	53.8324	60.0781	44.28	49.2654	52.2571	55.3587	54.7633	49.7752	63.0636	49.3136	45.3698	34.1818	48.5292	57.4501	35.5597
ARFGAP2_1	ARFGAP2		protein_coding	47.4551	45.1233	45.0871	44.9451	40.0651	38.6536	42.3083	42.3022	25.3044	23.853	47.7285	48.1665	49.1472	48.1062	46.9843	52.0265	43.6697	47.1448	49.9917	52.4628	49.6784	52.8235	49.9477	47.9082	45.3667
ARFGAP3_1	ARFGAP3		protein_coding	51.6236	46.8109	55.3083	44.3648	37.7606	34.1611	35.0903	18.7351	15.4778	12.343	78.6263	86.9124	78.908	78.4235	94.3338	70.2685	86.1528	71.579	78.4599	68.5833	67.6361	65.4096	73.1672	65.8134	62.4153
ARFGEF1_1	ARFGEF1		protein_coding	26.5532	28.6946	37.217	38.6745	21.9833	35.3225	45.3278	48.9165	29.2314	29.3047	34.0856	43.8584	37.2967	40.1942	42.8573	40.6703	38.4961	42.7658	35.8166	38.2786	40.3915	32.4743	37.0055	41.0303	33.5003
ARFGEF2_1	ARFGEF2		protein_coding	17.9667	16.1128	12.4358	13.3702	16.0981	18.0346	14.9107	16.0943	14.204	12.0129	27.4406	28.6426	27.7951	24.4722	29.1035	27.7425	29.4837	28.4601	28.8801	26.8652	28.093	23.8939	27.6227	30.5988	25.015
ARFGEF3_1	ARFGEF3		protein_coding	1.37414	0.940583	11.8238	13.1245	0.778136	1.27784	9.73555	9.4255	1.71417	2.40319	8.423	7.56552	7.35619	8.90808	10.407	8.64232	8.80829	7.6656	9.66541	6.53396	5.00511	5.3385	5.64589	8.17318	5.9864
ARFIP1_1	ARFIP1		protein_coding	54.1402	50.8312	45.6141	43.7545	53.7079	49.3289	46.154	41.5317	22.2089	17.9435	81.0743	86.374	87.8304	76.38	90.1852	79.1525	95.5388	91.4644	96.335	94.5117	89.4849	82.1992	88.7054	90.2221	87.9724
ARFIP2_1	ARFIP2		protein_coding	30.7737	28.2047	43.1545	45.8254	23.8386	34.9956	32.1332	44.7759	13.5144	12.1551	41.9875	44.0545	42.649	43.7631	42.0231	49.5616	41.8877	38.9732	41.4486	46.7594	42.6613	46.9807	42.9308	39.711	41.0997
ARFRP1_1	ARFRP1		protein_coding	36.0978	33.9676	39.8209	36.4591	29.8351	27.0835	29.294	22.6612	11.4925	9.86411	35.7151	37.6373	38.0037	32.4621	36.7502	37.2817	36.0417	38.0337	39.1401	34.4864	34.362	32.6435	33.6366	39.2503	31.4899
ARG2_1	ARG2		protein_coding	198.986	224.806	63.645	56.8622	59.1876	63.8587	30.7054	25.8177	2.97996	3.84233	15.1384	19.9168	13.6861	37.0743	28.4932	17.8444	23.8579	37.4912	40.5057	34.8792	24.8	23.9963	20.1207	24.4709	21.3082
ARGLU1_1	ARGLU1		protein_coding	135.808	120.809	126.476	140.147	121.985	187.376	124.045	211.114	50.1986	40.0373	166.029	168.179	166.354	155.542	159.778	174.924	170.433	165.473	174.264	178.681	149.014	161.585	180.085	190.727	138.786
ARHGAP1_1	ARHGAP1		protein_coding	64.32	63.7494	65.8574	70.6883	58.6397	68.9898	60.4713	58.6223	27.8183	27.1857	62.7071	66.9678	66.4725	68.5815	71.7256	60.3964	65.0181	61.1724	66.5221	69.0533	63.2798	54.6004	47.2794	55.8617	53.4892
ARHGAP10_1	ARHGAP10		protein_coding	17.4035	22.4663	22.0416	22.7643	16.6309	25.7752	24.6247	32.6511	17.5846	14.6486	36.3893	36.0255	32.838	38.1368	32.067	33.6837	37.49	35.123	34.5861	30.4256	27.8553	31.9953	28.0271	37.7268	30.0765
ARHGAP11B_1	ARHGAP11B		protein_coding	35.2349	36.9958	27.3789	29.5825	24.7112	19.0171	46.6563	37.2496	2.68481	2.18299	15.7014	18.8344	15.9357	20.0731	20.0415	14.3144	19.3228	23.9321	20.077	28.0488	25.0007	21.8883	20.7532	18.7781	18.5011
ARHGAP12_1	ARHGAP12		protein_coding	20.6442	19.4114	68.0644	82.8277	22.067	26.3309	40.7726	40.3518	16.4714	17.0344	26.6815	26.911	29.9276	26.4407	30.7715	27.5838	33.5437	27.3392	27.8462	30.6826	33.2402	27.0682	30.3203	31.1988	28.7133
ARHGAP15_1	ARHGAP15		protein_coding	2.35063	2.89083	0.452735	0.670225	7.46143	7.62747	0.551471	0.261265	0.388093	0.318736	6.49596	7.36255	6.2492	5.76926	6.16021	4.76672	5.73583	6.56946	6.23463	6.95441	11.2903	5.78942	3.76933	5.37484	4.51934
ARHGAP17_1	ARHGAP17		protein_coding	84.8739	84.7724	140.754	151.038	76.8592	89.6497	83.583	91.3819	44.6695	37.9303	60.7195	60.3538	55.2911	63.3503	63.6817	70.3856	65.2507	56.1212	62.0492	60.7635	65.6156	59.7364	58.5484	60.7872	58.9441
ARHGAP18_1	ARHGAP18		protein_coding	39.5103	42.2264	19.738	14.8593	35.9636	35.858	9.7826	9.52229	4.47293	2.92797	30.7241	28.8666	29.8577	23.0145	31.0993	28.4439	27.8552	25.9837	23.8489	22.527	23.2349	18.9828	14.2258	19.4673	16.7418
ARHGAP19_1	ARHGAP19		protein_coding	73.1234	70.1968	37.4588	38.1103	49.2389	39.8821	59.8607	55.3695	6.40095	6.79865	22.7124	25.2877	25.1816	24.0581	26.0028	20.1088	28.0834	27.1776	27.4723	31.7025	29.7499	25.2656	24.0545	21.9414	23.6715
ARHGAP20_1	ARHGAP20		protein_coding	17.7831	12.0096	2.82097	4.45263	10.5476	14.0874	2.5972	4.6672	1.83479	1.47543	9.65919	6.86561	10.5637	6.87606	6.53216	8.59727	11.1958	5.98947	4.93323	8.92348	7.72106	9.18632	4.76732	4.17997	7.54243
ARHGAP20B_1	ARHGAP20B		protein_coding	35.82	28.9157	0.377915	0.217999	10.8655	16.9876	0.905792	0.760173	2.19868	2.10524	52.0109	49.3233	55.7777	54.883	48.8158	62.994	68.4494	45.1626	44.2091	41.6147	32.0771	42.9327	30.6627	39.5809	34.2789
ARHGAP21_1	ARHGAP21		protein_coding	40.4052	39.904	45.1262	45.5499	34.3289	48.8741	33.9884	41.928	17.1075	16.1263	47.9176	46.7333	45.1541	43.9413	49.4154	50.8562	45.7807	49.7966	48.866	43.1297	35.9257	37.1751	38.3952	44.3927	38.0418
ARHGAP22_1	ARHGAP22		protein_coding	16.7542	11.6892	24.8656	23.3821	13.4517	13.53	15.461	14.4825	13.1153	9.22911	8.95393	9.23281	8.68289	8.11228	11.8019	8.47457	10.9545	10.3921	11.3359	33.974	24.3207	17.3217	44.555	35.5353	27.1941
ARHGAP23_1	ARHGAP23		protein_coding	8.36843	8.14647	11.6207	17.3961	10.0649	17.3421	8.51341	23.7933	8.72754	8.66798	11.1137	12.8162	12.8719	12.3174	14.6054	17.9092	12.0806	13.4736	16.1377	18.397	16.9308	16.0257	18.4018	19.1574	18.2315
ARHGAP24_1	ARHGAP24		protein_coding	36.6888	34.4766	3.95578	1.86894	23.804	30.2041	4.59562	4.30306	4.2784	3.16432	16.3461	16.6848	18.8255	17.3751	20.2458	17.3421	20.0379	16.6295	20.0099	16.2644	14.7954	16.7045	11.4758	16.5071	13.8716
ARHGAP25_1	ARHGAP25		protein_coding	3.48976	3.69951	0	0.075425	5.92232	5.88076	0.114993	0.08138	0.521087	0.396627	8.26512	9.17985	9.33897	6.61635	7.38945	7.40453	7.37949	6.14749	6.42475	6.54008	6.9083	5.75724	3.4219	5.10298	4.15141
ARHGAP26_1	ARHGAP26		protein_coding	33.8287	30.0636	28.8158	33.7504	23.2898	32.0646	25.0642	40.766	42.2	46.9025	24.5582	23.105	24.9994	26.4981	25.304	26.3098	24.7567	22.5182	23.3488	25.4679	25.2589	22.9234	26.1436	25.3703	24.5123
ARHGAP27_1	ARHGAP27		protein_coding	6.22061	6.07075	6.99397	7.06887	6.03874	8.10191	8.48047	18.8362	6.96588	7.82861	16.2288	15.3544	15.1706	14.7843	19.9937	24.6847	14.1706	18.1942	17.7556	18.6931	17.5058	16.8374	17.6566	14.7124	18.5591
ARHGAP28_1	ARHGAP28		protein_coding	90.7476	91.2377	4.01644	3.08546	100.831	142.054	1.53107	0.956819	5.21849	5.17485	10.7744	10.7938	13.0033	12.7369	11.189	8.84789	13.8841	9.40846	10.7862	11.866	10.0426	13.4989	6.05422	8.39585	9.89291
ARHGAP29_1	ARHGAP29		protein_coding	18.5629	16.7857	30.4483	36.7346	21.8324	24.0175	37.4681	40.684	23.3123	25.3875	23.5594	24.1954	24.4433	25.0658	27.9792	24.6211	27.3066	26.595	29.144	37.9747	41.5515	35.4365	41.8211	42.5301	35.5497
ARHGAP31_1	ARHGAP31		protein_coding	70.6653	64.8835	5.90699	4.45176	91.2381	124.69	6.1254	4.34951	10.7953	10.3257	53.7837	54.9094	56.0694	55.3735	58.6495	63.1054	59.678	49.3065	53.5026	47.4344	37.9624	37.8835	35.3734	44.1448	37.0514
ARHGAP33_1	ARHGAP33		protein_coding	29.8499	27.1102	69.3583	71.306	26.0033	35.7533	44.2684	64.7265	6.79904	7.05228	6.87218	6.5225	5.51245	6.15051	7.07718	6.77023	7.06888	7.17368	8.2535	11.8422	10.7256	8.4784	10.1991	10.3573	9.10212
ARHGAP35_1	ARHGAP35		protein_coding	94.5198	94.5406	97.6253	106	91.086	123.108	89.4951	104.693	32.4777	31.1208	41.3195	42.5908	43.1123	40.3865	45.5106	45.8934	45.4282	42.3281	43.4886	49.6665	48.2018	45.7981	46.555	45.8966	46.5303
ARHGAP36_1	ARHGAP36		protein_coding	0.349566	0.276684	0.008999	0	0.9335	0.907243	0.0092	0	0.143625	0.034507	9.07757	4.815	6.47551	4.59374	5.72832	4.79467	5.45837	9.64015	6.29044	6.13342	2.85307	6.42773	3.51425	5.57412	4.34118
ARHGAP39_1	ARHGAP39		protein_coding	19.8599	21.7364	60.3942	71.656	11.9156	20.4489	14.5741	27.1326	22.2269	22.2726	5.51252	3.07073	2.29145	2.69627	2.6513	2.91887	2.87311	4.82541	5.72552	15.9146	22.9317	6.58609	20.6017	10.6279	15.8036
ARHGAP39L_1	ARHGAP39L		protein_coding	25.6695	23.9891	31.0712	33.3712	18.1572	25.5735	28.7599	38.1321	13.7355	14.8532	24.3681	26.6045	25.8143	23.9201	25.6325	28.6286	22.8987	23.1739	23.899	26.6201	23.9641	24.448	25.3411	26.4568	24.4807
ARHGAP40_1	ARHGAP40		protein_coding	33.4687	35.8863	5.59005	5.40957	35.1062	36.208	4.40953	3.88474	15.8617	14.7689	25.5682	26.3442	25.8513	21.8943	31.7854	30.2747	22.6691	24.6995	22.3302	17.6076	18.94	16.4722	23.3477	25.0882	16.4495
ARHGAP42_1	ARHGAP42		protein_coding	16.4896	17.2406	18.0925	24.9622	19.4843	23.235	21.2581	27.8513	6.31604	5.74865	23.2931	23.1474	22.5545	8.8017	25.3241	23.2724	27.4342	21.8337	26.4793	22.5764	21.3797	21.3431	20.4645	24.3082	19.4632
ARHGAP44_1	ARHGAP44		protein_coding	2.50772	1.4716	5.08629	5.50678	2.0636	5.35484	3.40783	6.54991	0.382468	0.34283	2.02392	2.77714	2.71983	2.30634	1.80519	1.70045	2.02921	1.6043	1.77349	1.72039	1.3953	1.3992	1.06443	1.63296	1.99445
ARHGAP45_1	ARHGAP45		protein_coding	3.68235	3.78619	0.672918	0.854269	3.15154	4.27261	0.554914	0.613571	0.619781	0.693383	9.82677	8.18381	7.95538	7.88221	9.97841	7.95127	7.64269	7.7381	7.09536	9.19811	13.6356	7.26726	4.94385	5.69922	7.29863
ARHGAP5_1	ARHGAP5		protein_coding	93.966	82.1533	55.8895	61.6239	87.7243	80.7681	89.4343	74.2901	27.0179	21.9131	36.0807	40.2574	39.2315	34.9202	37.4784	33.6586	41.6652	40.6583	38.1134	43.9275	43.4541	37.6714	37.5013	44.7562	35.0007
ARHGAP6_1	ARHGAP6		protein_coding	5.61808	5.29846	4.36216	2.9822	5.02138	5.25724	1.66393	0.877944	1.54701	1.37752	24.0107	23.1068	26.1981	21.1105	24.8736	20.0259	21.9889	21.2355	19.6631	18.6057	13.4783	16.9911	11.4885	14.8547	15.2592
ARHGDIA_1	ARHGDIA		protein_coding	432.493	409.084	347.909	367.12	311.362	291.197	335.291	329.26	133.049	126.711	389.052	415.558	411.393	404.761	402.442	372.246	383.899	372.501	367.358	418.216	410.713	372.116	339.805	329.631	360.437
ARHGDIB_1	ARHGDIB		protein_coding	154.757	158.142	101.975	102.928	141.713	141.449	85.1935	59.7977	15.7142	14.8332	189.004	177.867	201.113	164.399	182.363	178.658	146.529	157.136	121.028	143.112	143.94	130.543	75.5234	91.8939	111.143
ARHGDIG_1	ARHGDIG		protein_coding	5.30339	4.31027	1.7469	1.45255	1.64384	2.5016	1.81136	2.71994	20.7534	20.5547	24.0962	26.1154	24.6601	26.6755	27.2693	35.4196	34.3014	29.9	26.0321	23.7801	26.092	34.014	28.9928	30.0727	37.9524
ARHGEF1_1	ARHGEF1		protein_coding	2.20333	1.5257	2.07616	2.04069	1.25214	1.62002	3.00669	4.34095	3.16533	3.11882	5.12054	5.29809	5.27806	4.99061	5.44728	5.47851	4.77537	3.42731	4.47223	3.2233	2.83235	2.9364	3.19894	4.24543	3.55937
ARHGEF10_1	ARHGEF10		protein_coding	25.9212	22.8618	14.6309	15.5225	20.4351	23.0376	22.556	27.1783	10.5564	10.3862	42.2736	38.4501	45.4855	35.4716	42.9651	44.8555	36.4684	36.9352	36.9882	41.7193	33.7457	35.9183	32.046	36.1987	31.7034
ARHGEF10L_1	ARHGEF10L		protein_coding	16.1637	17.4879	16.7151	17.5191	18.7761	33.2566	13.0946	25.3778	22.2914	22.7101	37.3344	29.9939	33.6959	27.9528	34.0015	33.6663	33.5077	34.4383	34.6854	32.1419	30.2131	32.9726	33.2139	32.4532	30.9055
ARHGEF11_1	ARHGEF11		protein_coding	37.9789	37.4881	36.6345	39.4236	45.9769	61.334	33.4828	45.1822	10.1613	10.7138	68.2558	69.8616	65.6359	71.594	73.1058	76.2991	66.1228	56.8417	62.946	65.2965	49.7834	57.8942	46.9069	50.1448	58.1361
ARHGEF12_1	ARHGEF12		protein_coding	89.137	83.483	73.1365	82.8634	79.4354	93.4496	86.3493	101.159	83.1086	93.4058	59.1615	81.5568	85.9583	86.6812	90.5453	95.1804	93.607	90.2312	87.7565	99.2992	97.4441	85.8702	83.7221	85.4531	85.4934
ARHGEF16_1	ARHGEF16		protein_coding	4.81281	5.75587	10.5951	16.6063	5.9039	8.88905	11.7655	19.5545	3.77965	3.75737	12.3215	10.296	11.8028	10.2979	10.5646	13.4766	11.5785	9.94736	11.221	9.84515	7.69541	11.0303	9.09497	10.3884	10.6786
ARHGEF17_1	ARHGEF17		protein_coding	45.5374	46.1238	23.965	27.5092	55.1974	77.7267	19.0028	29.1321	5.19723	4.23826	37.9622	35.1245	37.4501	34.3852	36.5273	45.7528	35.182	29.2476	35.7841	31.0295	23.8254	29.3658	21.5382	25.885	28.3855
ARHGEF18_1	ARHGEF18		protein_coding	18.1188	17.1089	18.2233	20.6055	17.9678	21.3203	19.3008	16.5157	10.7896	9.05268	20.5222	20.2411	18.5163	16.96	20.1081	22.5817	17.6102	18.2147	18.8198	17.6152	19.1964	18.5322	17.4925	19.4868	15.8757
ARHGEF26_1	ARHGEF26		protein_coding	2.58952	1.16357	11.8165	12.3078	1.22815	1.44069	10.1219	10.0253	4.31779	3.16252	22.916	23.7301	23.6783	21.6057	20.1337	25.9204	22.8658	23.9929	20.7057	16.8489	14.0829	21.0553	13.1132	19.8095	17.7654
ARHGEF3_1	ARHGEF3		protein_coding	31.7463	29.8824	39.2053	49.1699	14.5814	13.9306	30.971	20.9717	3.55873	2.59434	23.9904	27.3981	26.5701	23.6827	28.4357	23.7735	28.0998	30.7579	28.5686	22.836	26.1265	20.809	18.5675	24.1387	18.7312
ARHGEF37_1	ARHGEF37		protein_coding	0.665422	0.524449	7.38865	7.19902	0.422446	0.854353	1.75032	4.88233	16.822	15.804	15.0975	21.8086	17.3404	15.8305	19.125	28.0132	17.7648	13.4505	27.1866	15.2158	23.3601	18.2889	24.1218	18.9501	16.3811
ARHGEF4_1	ARHGEF4		protein_coding	1.11983	0.84543	0.465521	1.29925	8.91897	12.6334	5.78981	4.13183	21.8138	20.4725	12.7635	12.607	14.9504	11.511	12.8778	14.4606	14.8032	14.1201	14.83	14.1726	14.6159	16.075	14.9081	14.7731	17.2125
ARHGEF5_1	ARHGEF5		protein_coding	1.17515	0.316244	28.7819	33.2721	0.153341	0.260639	31.1031	39.4605	16.9899	17.3462	13.3868	12.6898	12.3295	10.4739	11.9701	14.6005	14.1219	12.9502	15.4675	15.2319	17.5483	13.9918	20.99	18.5957	16.5552
ARHGEF6_1	ARHGEF6		protein_coding	33.0909	36.8371	33.4956	45.678	37.8553	39.7556	34.1451	36.0738	25.7918	23.358	51.4235	50.204	51.4354	52.5808	52.1964	51.8963	51.164	43.2568	50.4175	48.0678	42.1745	42.1948	31.2532	36.641	46.5849
ARHGEF7_1	ARHGEF7		protein_coding	39.8829	43.231	21.5373	21.6656	47.1679	46.0831	25.5091	25.6858	13.8764	12.1786	25.6673	24.9404	27.7194	24.1202	28.3522	26.0673	31.0248	28.0033	27.4301	33.1999	29.5647	30.699	24.7118	27.6314	25.1683
ARHGEF9_1	ARHGEF9		protein_coding	10.6975	14.8547	0.157927	0.322203	16.5537	17.3085	1.95637	7.51022	8.5607	10.7205	40.3464	37.8386	38.4863	39.0671	46.1864	45.5451	52.1462	55.8374	53.5155	53.0445	47.2834	48.0625	47.3208	51.0422	43.5106
ARID1A_1	ARID1A		protein_coding	58.3707	61.2029	62.2387	68.3492	67.1062	90.9147	57.5215	74.2225	15.8101	18.7641	24.5051	26.2621	27.7459	25.6433	28.9118	26.4532	26.2265	26.3482	27.8453	32.9353	29.4268	26.9103	28.7685	28.5307	27.2541
ARIH1_1	ARIH1		protein_coding	100.583	107.358	119.203	122.059	110.881	102.457	129.179	104.687	44.7737	49.4725	98.3873	98.7411	102.232	94.5665	93.4736	95.1016	100.719	98.7666	101.682	106.937	105.343	102.254	91.1558	94.5475	96.8471
ARIH2_1	ARIH2		protein_coding	28.2792	26.326	28.9545	31.4432	25.4285	27.6384	31.149	31.3	20.4804	15.4564	26.2192	35.3275	32.8987	29.0552	33.6482	36.431	31.9276	31.9881	34.2833	36.6939	34.7553	36.4261	33.0486	33.3105	35.2807
ARL1_1	ARL1		protein_coding	128.532	121.483	89.7245	86.3112	99.0861	87.3508	93.416	69.6977	37.2066	33.3135	189.852	196.199	184.703	154.741	170.686	135.293	169.949	158.249	162.28	144.245	152.666	179.94	145.302	150.728	144.325
ARL10_1	ARL10		protein_coding	1.44964	0.993971	4.34926	6.87735	0.965282	0.811595	2.44051	1.8059	6.16216	3.25674	9.42778	8.91809	8.74101	11.9542	12.6991	16.8401	12.2602	17.23	17.0088	10.6946	12.5269	11.1285	7.50675	13.1543	10.4528
ARL13B_1	ARL13B		protein_coding	19.7356	16.8901	21.3467	21.6662	20.0816	21.2286	17.7105	17.569	10.8367	7.34814	20.1229	20.726	25.2229	18.3828	18.0563	18.2787	19.784	23.2476	24.7591	19.7787	24.8348	18.9941	22.4111	30.4061	19.9404
ARL14EP_1	ARL14EP		protein_coding	24.3739	24.6769	14.9199	15.1607	25.0439	19.8784	19.0398	13.8054	8.32694	5.09438	23.8188	24.7363	23.6053	23.4412	22.1308	23.1748	25.0273	22.8	25.7008	22.4227	21.709	19.8947	21.1992	24.6482	20.4368
ARL16_1	ARL16		protein_coding	8.50444	7.87459	11.1565	10.9404	8.27707	11.9679	11.8213	16.7096	4.8961	4.13603	9.1042	8.02865	8.40981	8.10415	8.64512	9.23368	9.07185	9.32941	9.76648	10.0557	10.4213	10.4373	8.56772	9.92379	8.51093
ARL2BP_1	ARL2BP		protein_coding	9.94778	19.1101	5.68899	13.3676	15.5142	19.1866	13.609	12.9641	3.54827	3.10623	16.7961	19.7747	15.8165	12.3349	13.4501	26.7186	8.17478	14.4361	9.51585	21.1231	16.3623	14.9535	16.728	15.776	12.7519
ARL3_1	ARL3		protein_coding	101.563	104.048	56.1985	63.8594	63.7015	60.449	79.1265	69.678	12.6105	14.465	42.4457	38.3729	39.6775	39.2221	37.4013	36.5213	43.2744	42.1283	41.9968	43.1911	37.9841	40.1728	37.7863	43.0422	39.054
ARL4A_1	ARL4A		protein_coding	35.2186	32.9045	90.9775	82.8377	38.1735	31.0824	38.8855	27.005	20.7407	16.9355	71.9682	63.5486	70.9164	55.5097	67.69	67.3775	84.4363	83.98	74.905	88.4339	97.2707	83.5817	83.702	90.0033	94.7792
ARL4C_1	ARL4C		protein_coding	191.385	256.131	104.873	100.986	56.7483	49.8683	102.328	95.1255	15.1353	12.9607	65.7668	79.2931	61.9274	72.3443	80.493	103.349	80.5792	84.4193	88.7635	72.7992	79.0118	66.5411	71.3064	76.0601	74.1708
ARL5A_1	ARL5A		protein_coding	36.0552	30.4196	28.854	30.2333	36.1181	28.0148	34.3096	26.2333	16.2131	13.8796	33.8338	40.5674	34.4017	31.9562	36.5533	40.1688	35.924	40.8869	39.0957	39.3786	37.3957	35.9274	40.0286	39.7661	37.0379
ARL5B_1	ARL5B		protein_coding	53.3609	53.6232	57.4774	62.0157	66.0643	51.7014	85.4717	52.0537	17.7841	14.0593	43.8688	46.3721	53.6094	52.2535	57.84	50.0318	55.0324	53.1311	53.325	50.2652	48.0243	49.6367	46.0925	56.7894	39.9199
ARL6_1	ARL6		protein_coding	14.9085	11.5583	14.6752	13.7037	18.8499	19.9097	13.0852	11.5418	6.23613	3.37105	16.0273	13.0257	15.6307	18.1736	17.3679	11.8027	19.3188	20.8105	20.06	13.5425	18.0331	14.3547	16.577	20.8027	14.4199
ARL6IP1_1	ARL6IP1		protein_coding	108.259	90.2798	97.4252	86.0402	72.0704	52.2272	108.351	81.3415	50.9623	43.9285	154.688	146.217	141.035	123.134	123.866	120.693	139.992	153.054	134.881	122.312	124.417	125.281	117.025	117.564	104.251
ARL6IP4_1	ARL6IP4		protein_coding	22.6911	22.0146	26.7682	31.7328	22.8184	29.6923	25.2952	37.7227	18.4255	17.3782	33.7536	32.9236	29.5034	29.6246	31.1709	31.2263	27.653	29.0655	29.6593	32.6346	32.2687	32.4165	33.4547	31.5111	29.6035
ARL6IP5_1	ARL6IP5		protein_coding	79.3566	80.134	45.9325	47.4162	80.9201	64.3425	92.9834	64.5283	39.5447	24.3798	185.849	200.604	209	163.711	192.089	148.525	203.618	188.85	199.061	203.614	159.951	192.61	169.637	158.355	152.186
ARL8A_1	ARL8A		protein_coding	41.2616	40.9205	40.4561	46.9442	33.2477	36.3965	37.3265	42.0242	35.797	37.831	60.9402	61.2864	61.0256	67.0216	62.2035	70.8057	67.0719	53.0247	66.6511	65.4868	63.3511	68.1019	65.0835	66.7564	60.4751
ARL8B_1	ARL8B		protein_coding	59.6521	57.0312	63.3321	64.4253	51.5538	40.9759	68.2693	46.0525	80.2704	57.3175	132.32	133.685	128.86	117.997	132.071	129.818	157.398	169.283	164.978	147.279	172.912	127.73	177.852	174.657	151.931
ARL8BL_1	ARL8BL		protein_coding	21.0828	14.545	9.16661	9.43951	14.287	9.04438	23.5022	13.3543	9.37424	9.0869	41.1808	30.2469	20.9371	27.7745	27.0774	33.8034	27.5236	29.1211	24.6271	23.0383	14.075	28.205	17.3626	14.4657	23.9905
ARL9_1	ARL9		protein_coding	9.43932	7.21547	14.2432	14.213	8.71877	7.44971	16.1894	12.9268	12.8656	8.88354	15.9876	16.7844	17.8243	18.0873	13.9098	16.4746	16.2183	20.9526	18.5919	24.6493	24.4872	23.3614	27.7491	29.2753	33.3055
ARMC1_1	ARMC1		protein_coding	38.7932	35.4344	28.4056	29.142	36.3745	25.9258	35.7806	24.6781	13.1325	10.1011	35.9894	43.4057	40.4636	37.7349	37.7061	34.6555	41.6718	43.4102	42.2973	41.5861	39.2686	37.4419	37.1395	41.3024	33.304
ARMC10_1	ARMC10		protein_coding	5.37877	5.73786	3.37441	5.03356	5.32938	4.92838	5.05513	4.49951	1.80797	1.78245	11.258	9.30767	10.0148	11.6511	9.26653	7.6437	11.7161	10.7782	9.26872	10.0062	9.45356	9.84098	7.96192	9.16828	8.63596
ARMC2_1	ARMC2		protein_coding	3.71578	2.93178	5.02283	5.60319	2.68114	3.81326	3.57374	5.4113	2.18877	3.18369	1.23109	1.41436	1.45714	1.50184	0.845537	1.07572	1.54001	1.62413	1.33904	2.50303	2.26609	2.43204	3.84763	3.13374	3.26189
ARMC6_1	ARMC6		protein_coding	42.4814	48.3108	45.749	45.7901	42.5991	44.0434	45.8107	44.0448	19.8894	18.5842	40.5494	41.6142	40.1639	39.3952	42.3871	40.3924	40.3667	38.6749	43.2533	46.4946	43.4791	48.838	42.5766	45.7236	42.1801
ARMC7_1	ARMC7		protein_coding	17.8412	17.1137	20.8556	20.3566	18.6068	17.8289	19.4291	17.2298	9.59176	7.86766	22.4183	23.4413	26.8001	22.7199	23.3449	23.4915	19.8071	24.7754	21.8119	23.8665	23.4865	27.894	23.0804	23.122	21.9972
ARMC8_1	ARMC8		protein_coding	29.4853	27.6228	30.5097	32.5263	25.2093	28.4736	38.0432	40.8028	13.5023	11.6108	38.4498	37.0133	36.1611	38.817	37.9228	37.3162	40.2062	37.2407	38.0604	40.5728	36.3853	36.6173	38.5376	42.3323	36.1421
ARMC9_1	ARMC9		protein_coding	16.1359	13.6797	20.9158	18.0816	14.8969	20.4156	18.1368	22.7209	3.15107	3.62364	12.1717	13.6397	15.062	11.3806	13.5917	13.601	12.7954	13.6314	13.5138	14.5462	13.1864	13.1427	11.6152	13.6872	11.7169
ARMH3_1	ARMH3		protein_coding	20.528	21.0401	25.3349	29.247	18.2816	25.9749	25.9862	32.4351	10.5949	9.75747	27.9265	28.4231	28.2386	35.7295	30.7997	27.9202	29.7224	31.7321	30.6372	31.4876	30.2992	30.9057	28.9649	27.586	27.303
ARMH4_1	ARMH4		protein_coding	9.41778	5.35439	4.83503	4.29129	3.94791	7.24776	1.81419	1.56697	0.082287	0.211367	0.194956	0	0.136954	0.056318	0.101687	0.153888	0.032225	0.119565	0.032496	0.164237	0.110845	0.092091	0.106681	0.057593	0.06938
ARMT1_1	ARMT1		protein_coding	14.6223	13.1584	8.14317	7.33515	9.41203	8.92362	9.3706	7.10598	4.76559	2.9856	16.4583	14.2768	11.4911	14.9558	17.2294	13.9123	20.6252	21.8661	15.1626	17.8244	18.7931	15.6279	16.7884	13.7312	11.6866
ARPC1A_1	ARPC1A		protein_coding	222.796	209.073	237.232	245.789	143.149	119.732	229.279	201.563	214.649	211.072	160.293	155.505	156.653	154.225	161.129	173.219	164.893	156.192	154.359	188.437	204.027	187.1	185.019	176.101	183.047
ARPC1B_1	ARPC1B		protein_coding	55.3869	55.2175	1.98546	4.26916	30.901	34.4174	3.36118	2.80239	12.2968	12.5942	107.072	100.929	112.591	114.784	107.833	121.044	93.8204	93.0625	81.8638	89.349	111.994	81.6854	63.6272	63.515	72.4765
ARPC2_1	ARPC2		protein_coding	242.665	230.561	190.729	197.57	214.487	197.015	201.106	167.994	121.518	120.694	326.505	360.162	332.306	320.297	316.363	279.261	325.741	334.89	296.209	303.337	322.152	293.612	288.408	285.62	280.225
ARPC3_1	ARPC3		protein_coding	243.929	227.518	196.985	210.181	176.575	160.588	197.166	158.754	97.6658	95.1079	296.144	292.178	284.912	281.493	280.277	254.666	285.946	300.462	278.26	277.036	313.102	269.506	275.358	280.908	242.152
ARPC4_1	ARPC4		protein_coding	209.853	201.308	173.842	166.727	142.569	139.321	159.862	147.889	106.199	96.9902	307.8	295.181	273.544	307.87	316.007	312.04	291.146	299.573	307.131	321.521	347.883	299.731	249.854	252.659	287.11
ARPC5_1	ARPC5		protein_coding	337.196	342.395	208.258	227.627	262.912	237.488	244.57	192.769	80.1779	66.4659	360.585	389.613	389.03	398.471	430.568	364.881	399.841	371.401	361.819	403.904	404.848	346.539	299.418	302.136	346.193
ARPC5L_1	ARPC5L		protein_coding	24.253	23.2089	65.1617	70.3744	17.4031	18.1517	72.246	93.4689	60.2238	44.7965	67.2139	76.0736	65.4537	69.5663	68.0453	72.2888	64.7926	81.9326	75.6834	78.2504	87.1748	85.6898	95.5319	89.9031	78.2623
ARPP19_1	ARPP19		protein_coding	283.842	278.618	329.558	369.617	275.866	222.005	319.248	273.689	205.764	172.309	184.949	218.864	192.867	189.413	185.61	173.257	224.685	235.896	231.807	237.738	238.832	195.45	238.127	252.225	200.793
ARPP21_1	ARPP21		protein_coding	29.4141	28.8109	26.1888	30.7883	25.0742	41.0401	9.1151	13.6774	3.65239	3.62176	38.2227	37.769	50.2165	31.6	34.5839	32.257	31.8446	30.1842	24.5979	27.3758	12.1234	25.2012	12.613	22.4341	18.5195
ARRDC1_1	ARRDC1		protein_coding	5.51818	4.72459	13.8764	15.7693	6.69862	8.33339	20.6363	28.9484	37.1395	35.937	22.6624	20.7672	21.7601	20.7865	21.5658	24.395	18.7818	18.5384	21.6786	26.3172	31.9341	27.197	30.7501	33.4947	28.7941
ARRDC2_1	ARRDC2		protein_coding	7.75047	6.85147	5.40093	6.44665	11.2723	11.9011	7.21187	6.4708	5.11549	4.12291	43.8888	34.2975	42.4143	31.7928	36.5501	45.8978	37.4083	31.9348	31.8869	29.3929	28.2906	34.0837	22.0127	21.053	25.9135
ARRDC4_1	ARRDC4		protein_coding	11.3816	11.9246	11.1884	11.8369	9.08722	10.1952	13.3586	11.4941	19.4381	12.8473	41.8629	43.4051	51.306	39.6794	45.2212	49.1464	44.9582	48.6332	45.8855	33.2652	32.7022	33.8354	36.9976	46.3681	31.9201
ARSA_1	ARSA		protein_coding	14.3646	13.7384	16.482	18.5604	14.7291	18.6882	18.8353	19.0302	8.75222	10.592	19.9665	17.9955	17.7781	17.6762	18.1365	17.7612	17.4239	22.3595	20.2116	20.6432	22.4602	25.9001	16.6696	16.4912	23.7746
ARSG_1	ARSG		protein_coding	4.06494	2.88615	3.77634	4.95056	4.04676	5.58982	4.15611	6.37226	2.11321	2.11412	4.75961	4.28205	4.65454	4.93669	4.6233	3.83473	4.69694	5.11027	3.43443	4.33938	3.91765	3.94404	3.91596	3.23412	3.83256
ARSH_1	ARSH		protein_coding	2.49383	1.91505	2.6978	1.58231	5.14243	8.98007	0.167724	0.180242	0.853671	0.869733	15.113	12.8142	18.9502	14.8623	16.9796	15.5275	19.8608	20.5169	19.3481	21.8	16.8321	16.8672	14.9252	18.5129	15.9447
ARSI_1	ARSI		protein_coding	20.4626	25.3146	1.87571	1.51414	31.5443	37.6448	0.911434	1.08306	1.73673	1.00272	15.8279	13.4222	11.7865	24.3838	16.7611	21.9819	14.8139	19.7145	20.2755	15.4321	18.0414	12.9394	10.5916	14.5471	15.855
ARSJ_1	ARSJ		protein_coding	18.3125	14.1531	19.7104	19.6075	12.865	17.2073	19.3768	24.7723	7.73231	5.3222	15.074	17.3979	19.0984	15.3046	15.2878	14.672	13.6222	14.4365	11.9217	12.0327	8.67435	11.1185	9.22983	10.1643	9.79073
ARTN_1	ARTN		protein_coding	0	0.138555	0	0.265724	0.728931	2.50708	1.18924	1.33806	0.16562	0.242761	2.50346	3.008	1.63143	1.5892	1.90093	2.88393	1.23179	2.9726	2.07579	2.24289	1.41847	2.00678	1.29238	2.10899	1.60497
ARV1_1	ARV1		protein_coding	8.2288	8.1775	8.59888	9.11462	8.51636	8.69986	11.3291	9.80549	6.00035	4.93012	15.7048	17.3649	13.131	14.8516	15.1855	15.9975	17.3828	15.3209	18.2685	14.9654	14.2223	14.2544	16.9982	15.7442	13.5172
ARVCF_1	ARVCF		protein_coding	30.397	27.2233	108.871	125.431	37.7605	45.9302	77.3489	91.4424	11.5857	11.4134	26.6087	24.3673	30.0533	21.0691	22.4501	22.6852	24.3075	25.7448	24.554	25.296	24.2267	23.1745	21.8406	25.8794	24.4811
AS3MT_1	AS3MT		protein_coding	1.96311	3.8193	6.79174	9.131	4.98012	6.05791	6.25098	6.59755	2.41927	2.27448	18.7792	29.5493	27.0005	29.304	27.7727	24.1485	19.1864	18.4652	26.5572	26.9813	23.8384	27.588	15.1128	15.4044	19.6151
ASAH1_1	ASAH1		protein_coding	40.4551	26.4538	200.435	125.707	32.7322	23.304	130.443	91.1249	123.748	112.199	317.702	299.447	302.102	276.712	286.562	312.661	309.338	335.94	303.616	259.992	341.367	315.772	288.957	313.832	304.406
ASAP1_1	ASAP1		protein_coding	39.809	41.8706	11.9694	12.6674	42.0018	59.6909	8.5091	9.01292	3.65487	3.05014	14.5088	15.2202	15.464	13.4935	16.5923	13.6285	15.7933	17.458	14.7462	16.205	15.3008	14.0927	11.9209	13.7992	11.4162
ASAP2_1	ASAP2		protein_coding	15.6424	19.283	52.2236	55.6316	18.3033	25.6075	67.7608	67.7177	12.9193	10.1966	17.6221	12.345	16.8846	19.7601	21.6178	12.2085	15.1985	14.4388	25.5582	25.789	26.6477	21.7618	15.7848	28.1484	23.5498
ASAP3_1	ASAP3		protein_coding	59.1486	64.2013	33.3101	38.5033	86.824	158.493	65.1163	108.915	15.7754	12.8145	96.956	84.4632	82.3249	70.1856	73.6255	92.2712	69.4249	70.5845	71.9739	65.9042	49.1508	63.2086	53.325	60.6684	49.824
ASB1_1	ASB1		protein_coding	81.5753	74.6604	66.9033	68.9991	56.847	51.7017	40.9448	32.9927	18.5185	17.0759	53.5369	61.249	50.3661	54.0584	59.9195	52.3347	50.7042	56.6002	53.6753	47.2297	44.0432	49.0871	44.444	48.4326	45.3969
ASB13_1	ASB13		protein_coding	4.35383	4.3628	9.97168	8.85313	4.93096	4.94467	7.13011	6.13409	4.3597	3.59546	9.21841	6.97834	8.8302	7.22262	6.16678	9.34708	9.10817	9.31342	7.9022	9.87748	7.77685	8.37252	6.00927	7.20379	7.88356
ASB2_1	ASB2		protein_coding	0.086765	0.069576	0	0.021858	0.231885	1.42969	0	0	3.67717	3.15581	13.4556	12.6773	27.115	14.2668	12.259	14.6782	17.5813	11.7789	11.5025	11.8379	11.3731	13.1958	8.04067	10.1934	11.6788
ASB3_1	ASB3		protein_coding	14.8388	14.9337	12.8672	13.044	16.0557	15.6598	17.5579	14.9694	3.91854	3.35269	12.8893	10.2255	14.3034	12.6208	11.5529	11.9845	13.4576	10.227	13.7664	13.4382	11.4422	13.5947	11.7597	11.677	11.4074
ASB5_1	ASB5		protein_coding	12.8113	10.8357	7.09672	8.54498	12.9056	10.1868	8.56848	5.16927	1.83854	1.16262	9.79215	11.1719	11.5422	11.4104	11.6602	10.1347	9.89736	10.7546	10.2196	9.57391	9.24599	8.81214	8.68565	6.83265	9.17163
ASB6_1	ASB6		protein_coding	14.805	16.0357	18.2747	18.34	14.0961	15.6416	15.3278	16.8367	8.41759	7.17885	17.9731	16.7967	17.1487	17.9506	19.1705	21.0009	16.1422	18.0035	18.9054	19.381	18.2705	19.6401	19.3464	20.5761	18.2621
ASB7_1	ASB7		protein_coding	11.6673	12.5927	10.6035	11.8274	14.8621	16.9961	10.5614	9.98814	4.22452	4.1329	10.8158	11.5135	10.2116	10.9368	10.1853	11.2438	9.80435	10.7351	11.3492	11.4535	10.2064	10.5054	9.2279	11.9772	10.4309
ASB8_1	ASB8		protein_coding	14.7638	13.3067	16.7287	17.7685	15.1389	16.0052	13.8934	17.2314	7.42334	6.91419	16.5093	17.7618	18.1098	16.8562	17.6765	20.3697	15.5198	15.7723	16.4166	17.4564	16.8127	18.1378	14.8173	16.9921	15.6102
ASB9_1	ASB9		protein_coding	14.3467	10.1817	22.7102	29.3611	11.1435	12.2975	13.9178	16.9707	6.49439	3.50263	11.6467	10.1211	13.0416	9.73479	12.7961	10.3754	11.8726	12.6728	15.1195	10.8376	12.8328	11.4678	12.3576	12.4781	10.8516
ASCC1_1	ASCC1		protein_coding	32.4939	40.9909	25.4822	33.8185	23.6667	23.3088	21.5348	21.0386	13.7743	13.2387	36.19	29.47	30.354	32.6051	29.4788	37.7698	37.5072	31.6946	33.3048	37.7151	33.9346	35.5852	18.9581	25.3799	29.3578
ASCC2_1	ASCC2		protein_coding	16.492	17.2472	23.5116	28.1957	15.7074	24.7634	17.1153	22.8032	9.49449	8.50497	25.2064	22.9786	20.3551	21.2551	20.3148	23.4481	22.3394	23.7513	22.5032	23.7823	24.4831	23.5795	22.1996	20.7351	19.8753
ASCC3_1	ASCC3		protein_coding	20.4313	19.6964	28.4496	25.4208	19.0236	21.3683	21.5108	21.943	9.47893	9.59691	16.4275	16.5655	16.3155	16.8133	18.1864	14.7287	18.403	17.4026	17.523	18.354	19.8292	16.6571	17.4608	17.9878	16.0689
ASCL2_1	ASCL2		protein_coding	2.97466	0.98734	37.1525	37.1514	1.72188	1.48352	28.2351	28.5381	37.6237	25.8581	13.0377	14.3547	14.5528	9.33817	10.0656	10.4536	8.98419	9.06901	11.0203	11.6479	14.0186	11.3772	15.9451	12.951	22.9617
ASF1A_1	ASF1A		protein_coding	97.1153	103.859	88.0656	86.1825	109.758	95.4253	108.894	89.4528	21.3418	19.7056	63.8088	77.2449	64.3024	71.8188	66.3378	59.3161	64.0172	71.6074	64.0819	76.2848	75.6116	72.9758	70.7216	75.9584	59.6478
ASH1L_1	ASH1L		protein_coding	61.7393	60.5938	76.5823	91.561	69.2297	89.6097	88.237	112.199	22.7871	21.6849	49.1179	51.1056	52.4221	44.8017	52.3204	52.9896	54.3474	46.982	49.9482	48.5769	42.1689	45.8382	41.2894	48.2647	43.5636
ASH2L_1	ASH2L		protein_coding	48.9115	46.7996	62.6568	62.0844	44.8818	47.3119	62.9071	67.4232	19.8674	17.246	36.4773	40.464	37.9505	36.4085	40.1324	39.3418	38.164	35.3068	39.6183	44.3893	37.6565	43.6592	39.041	39.9416	38.8136
ASIC1_1	ASIC1		protein_coding	14.1831	14.2144	1.40499	0.223961	34.6019	49.497	0.267864	0.059543	1.03791	0.989178	11.9326	10.8992	16.0644	9.72116	8.62259	12.7091	11.2314	9.1141	11.8064	9.59754	6.81691	8.54733	8.34498	8.44297	7.95157
ASIC2_1	ASIC2		protein_coding	58.4161	41.8173	0.261786	0.38992	44.7971	62.8305	1.89352	1.23019	1.16929	1.86133	3.14087	2.39738	3.41131	4.49704	3.83402	4.0464	6.25707	6.66838	12.4203	16.4305	15.0308	12.6017	13.0736	14.6557	10.964
ASIC4_1	ASIC4		protein_coding	1.15301	1.0755	0.748491	0.5894	1.99138	5.4912	1.08393	2.70513	0.971433	0.896695	2.37939	2.30243	1.30189	3.67351	1.49899	3.36556	1.74194	1.81037	4.08776	3.01443	4.01691	2.33913	1.86134	2.47105	2.3355
ASIP_1	ASIP		protein_coding	21.4814	7.48731	0.590108	0.151078	5.41972	1.97871	0.990788	0.532014	2.04229	1.29057	3.93009	12.4702	11.1705	6.81276	8.21477	4.86475	16.6774	14.8711	18.7255	63.3549	45.852	43.6528	21.4816	51.4008	57.1715
ASL_1	ASL		protein_coding	1.80594	1.72009	0.810021	0.13083	1.96323	1.7219	0.832911	0.205221	6.79676	3.52616	28.0372	21.4343	23.035	27.7662	28.8989	21.3698	32.9188	28.6497	26.752	35.9026	47.9151	23.9622	21.7096	19.4291	26.2905
ASL1_1	ASL1		protein_coding	0.201291	0.755235	0.038957	1.27249	1.76954	2.58792	2.44721	1.94846	3.11079	1.26689	3.41146	1.38392	0.827935	1.56635	3.20186	2.28962	4.17289	2.86497	4.00698	4.3736	4.3436	2.86434	3.13526	1.06779	2.54763
ASMTL_1	ASMTL		protein_coding	14.0205	12.6621	19.056	21.2215	17.9276	15.8324	20.388	14.0274	3.80247	4.45754	14.0497	16.5744	17.2381	17.6644	14.9318	15.1739	17.3437	20.2939	17.2793	17.4401	18.1881	19.9458	16.9359	14.0469	12.344
ASNS_1	ASNS		protein_coding	34.795	27.9263	17.3466	15.0967	19.9999	14.5921	43.9656	30.3534	60.7022	53.215	62.7998	58.2825	53.0019	60.1047	57.5549	57.031	63.821	63.5899	59.5383	72.0793	75.5465	63.3831	66.7326	61.6125	64.9562
ASNSD1_1	ASNSD1		protein_coding	32.2783	36.9717	31.1565	30.6113	33.0993	23.3134	32.5847	26.1103	12.7648	8.5787	27.1986	38.9312	28.6921	29.9395	36.3548	31.1668	31.9323	36.3005	32.6932	32.8088	32.3647	30.1697	38.2074	43.2176	29.5598
ASPA_1	ASPA		protein_coding	2.04462	1.77217	1.74003	3.52916	1.67215	2.2767	0.525849	1.0367	0.941036	0.735284	5.08338	4.56268	5.55232	4.32558	4.6578	2.31042	3.5995	6.0002	4.87893	4.9754	5.95819	4.78181	3.9405	4.23541	4.41271
ASPG_1	ASPG		protein_coding	27.188	40.3335	5.06705	4.17389	38.7801	39.3913	6.06692	5.84204	10.5515	14.5171	19.1196	15.393	21.3426	15.9431	17.971	15.2301	18.9354	17.5644	15.9054	15.8922	21.097	17.4034	14.1803	16.3474	17.1087
ASPH_1	ASPH		protein_coding	157.969	130.655	64.0697	76.1523	66.9538	71.5399	75.6685	57.7452	14.7176	10.2962	145.977	219.515	93.5958	199.087	155.418	85.5771	100.188	137.894	194.251	75.667	154.71	154.41	95.7647	81.6225	65.8409
ASPHD1_1	ASPHD1		protein_coding	4.45011	1.93744	0.087915	0.069275	1.28508	1.17235	0.227839	0.112648	0.27671	0.259973	17.0359	20.5632	18.5564	11.1338	22.0752	18.068	15.8852	15.3119	14.9632	10.5159	6.75143	9.90873	8.40889	7.99413	8.82688
ASPM_1	ASPM		protein_coding	77.599	78.77	47.889	48.3012	59.8971	58.6539	80.4133	89.9019	5.29841	5.19825	27.6878	30.1609	32.4909	34.5332	34.0341	21.1152	37.4569	37.0182	32.1851	37.8671	37.9018	27.4986	30.8463	29.3742	27.7237
ASPSCR1_1	ASPSCR1		protein_coding	48.0049	44.2945	54.1097	53.6496	40.9549	53.2146	56.4027	52.658	31.938	31.9234	52.0957	47.2522	48.3079	45.6182	49.3204	44.7602	44.8288	50.7386	50.1847	56.0939	56.7501	46.6069	54.5059	58.4126	55.4801
ASRGL1_1	ASRGL1		protein_coding	14.5418	16.0208	5.33859	5.32627	16.2968	15.4939	9.35944	7.89088	11.8482	9.3826	15.0287	12.9575	15.2763	14.9339	16.3185	11.8156	12.8963	13.2442	12.4342	14.1754	13.415	14.2695	11.1039	13.8282	10.0808
ASS1_1	ASS1		protein_coding	3.03322	2.95367	0	0	2.91546	2.75758	0.15294	0.270552	16.0857	19.6011	108.285	90.5769	99.07	144.05	114.329	93.8741	103.604	97.6008	92.6092	120.159	148.085	103.367	80.6436	89.1136	89.2422
ASTE1_1	ASTE1		protein_coding	8.44206	8.25505	10.226	12.59	8.9351	12.6206	11.1296	12.4511	2.06127	1.61059	8.30193	7.85942	8.43374	9.76342	10.2358	9.27054	8.62911	9.68817	9.7817	11.0771	9.17058	9.70095	8.53125	10.3231	7.46234
ASTN2_1	ASTN2		protein_coding	16.1089	5.66432	377.949	389.054	5.38947	9.98419	93.3684	105.069	3.78776	3.80871	1.85846	1.79064	2.07934	2.52304	2.05493	1.99343	2.7723	2.93967	4.6291	4.68762	4.62687	3.93379	4.38127	4.0688	3.97918
ASXL1_1	ASXL1		protein_coding	25.1046	24.2095	25.9309	29.824	23.9071	30.8492	29.3302	35.2417	6.1692	6.74167	13.4258	12.5253	13.9697	12.6304	13.9746	11.9929	14.4804	14.5128	14.2389	15.7661	15.0615	13.9996	12.9041	14.2234	13.4228
ASXL2_1	ASXL2		protein_coding	17.2934	15.9352	16.1808	16.7414	16.3147	24.7136	17.0347	24.9196	14.6403	16.7292	26.0219	24.1501	24.6671	20.4816	24.1013	21.8322	23.8273	22.9964	25.1825	23.753	23.3792	18.9698	21.6795	24.2015	22.0212
ASXL3_1	ASXL3		protein_coding	22.756	21.0874	40.86	37.9251	29.6579	39.0097	33.3004	30.2374	3.16468	3.68955	4.38135	4.48164	4.74233	4.32271	5.31454	4.27456	5.44014	5.19154	6.07692	6.55419	6.96517	5.92881	6.18684	6.7211	5.48793
ATAD1_1	ATAD1		protein_coding	39.5271	37.1205	45.4749	49.0496	41.3658	44.4299	45.228	41.6454	10.0408	10.8692	35.6474	41.6352	40.751	36.8407	37.5458	36.8748	38.1936	38.6435	40.3186	41.6528	44.0469	39.1092	38.6646	37.5981	38.5407
ATAD2_1	ATAD2		protein_coding	26.3569	25.2155	23.5752	25.3287	26.8465	25.4754	44.9243	42.8971	4.05961	3.71471	23.7774	30.2496	25.526	27.7505	26.4957	20.1875	27.5867	25.7455	27.2242	28.9865	25.6298	23.0858	23.5987	23.3967	20.6822
ATAD2B_1	ATAD2B		protein_coding	23.0205	22.8592	27.4353	29.7103	33.9172	46.0311	27.035	29.4614	17.1951	19.9268	27.3912	29.6452	26.8497	25.6573	28.5355	27.566	26.7842	26.5798	31.5521	29.9993	30.5429	26.5797	31.5257	34.8498	26.4441
ATAD3B_1	ATAD3B		protein_coding	51.8756	46.7403	62.4923	58.4784	35.619	32.2741	65.4327	64.6921	14.7005	17.7951	20.0201	22.9248	19.0292	25.5614	20.2856	21.3223	22.3126	22.3667	23.9912	30.6545	33.7706	28.1064	33.7983	31.8494	30.7076
ATAD5_1	ATAD5		protein_coding	22.7711	22.3197	18.8868	21.4065	18.3775	15.6892	33.1136	28.8884	4.40242	4.03971	10.97	14.5654	11.5751	13.707	12.9643	9.0994	12.7173	13.2824	12.3666	13.7952	13.0855	10.9329	13.3054	14.7255	10.2214
ATCAY_1	ATCAY		protein_coding	3.79479	6.07244	1.3288	1.05948	7.94809	8.88903	0.840008	0.549594	1.0705	1.4597	2.63204	1.44771	2.32645	2.65785	1.65717	2.81822	1.7218	2.28254	2.25359	2.19843	1.47894	1.41767	1.1825	1.54552	0.786461
ATE1_1	ATE1		protein_coding	35.3925	35.9356	26.8097	30.782	42.0433	39.5033	29.2917	28.8413	9.80977	9.42167	46.1978	48.9618	46.0004	46.8192	45.7821	41.3049	53.4208	44.869	51.0666	47.0514	41.5087	43.5744	40.2135	45.8256	41.7856
ATF1_1	ATF1		protein_coding	90.4115	89.9158	75.6106	78.2452	95.6908	83.2986	98.4301	80.2202	29.7594	24.5779	81.8589	91.5185	87.2464	87.8598	87.8018	85.8996	96.2304	98.1607	99.8944	101.351	103.222	93.0258	91.4885	98.9718	91.8775
ATF6B_1	ATF6B		protein_coding	25.9213	27.017	27.4476	30.4175	30.4969	39.1311	26.4753	32.6912	18.1477	20.0151	22.5027	21.7572	20.097	21.9601	23.659	26.5078	23.1582	20.6884	20.7408	24.5062	20.7994	22.4702	19.3343	20.1125	21.7021
ATF7_1	ATF7		protein_coding	16.1364	11.4691	14.448	15.8197	18.9062	42.0467	13.0014	24.3036	5.64968	6.64003	15.1902	16.1262	17.2958	15.445	16.996	18.4651	14.6186	16.2417	16.5252	16.5162	13.0868	15.8262	12.2962	13.511	14.5769
ATF7IP_1	ATF7IP		protein_coding	30.4176	35.0079	45.8019	53.9762	46.513	67.1831	51.79	60.9945	18.0654	17.42	29.7191	26.6605	29.9582	22.9305	24.2686	23.6184	24.8418	28.2684	27.4113	24.4756	23.8268	22.6707	21.8661	26.2441	21.2544
ATG101_1	ATG101		protein_coding	48.3016	49.9299	60.1571	67.2339	54.985	66.4706	66.9215	75.9749	71.2902	64.2188	58.7495	67.1298	59.5085	66.6783	70.2237	74.7254	65.3253	64.066	54.9811	64.2008	67.4026	69.7793	73.2871	67.8835	70.8369
ATG13_1	ATG13		protein_coding	45.1215	45.7918	61.4941	69.5205	63.8396	64.3345	62.055	57.141	103.093	106.547	109.43	100.273	105.827	95.8479	101.868	106.143	110.526	107.077	104.742	105.421	112.947	100.47	98.8232	103.87	110.207
ATG14_1	ATG14		protein_coding	12.4581	12.3722	10.3023	10.9932	11.1301	13.9454	9.8015	11.4633	6.6622	7.06192	11.4081	9.51289	11.3296	10.4335	11.5213	10.1953	12.128	12.81	11.2828	12.4003	12.9406	13.7721	13.1227	14.5446	12.5634
ATG16L2_1	ATG16L2		protein_coding	28.6464	26.3766	30.0034	32.4169	20.4455	28.9747	29.3746	43.563	17.549	14.7308	31.2751	35.8676	30.5274	35.0743	33.0328	36.2794	32.8425	31.4348	33.3191	38.4425	34.5805	35.9162	40.2642	37.5718	36.6055
ATG2A_1	ATG2A		protein_coding	25.552	25.6931	26.2556	29.6682	27.8599	37.3486	25.1944	30.5176	18.8404	17.6262	19.6714	20.5389	19.771	19.6218	21.8537	22.737	24.1255	22.172	21.5239	22.0923	22.3883	17.9838	24.4239	24.8805	21.4257
ATG3_1	ATG3		protein_coding	80.7238	81.8143	73.0723	75.2045	67.5277	61.7545	73.7801	62.8741	28.3171	21.4517	74.4559	79.1655	69.5689	67.6892	72.8678	68.7154	67.37	74.4649	66.3934	64.4199	67.5337	61.661	65.1841	75.1433	64.3351
ATG4A_1	ATG4A		protein_coding	27.2228	26.4849	16.6312	16.7855	33.3973	33.825	16.1144	14.4992	12.7091	10.1652	38.9415	38.8005	37.3825	38.7686	36.6594	38.6925	40.4684	34.2734	37.4224	32.5156	32.5655	31.4689	31.6739	36.7945	35.1144
ATG4B_1	ATG4B		protein_coding	36.8959	31.5233	39.4371	35.8576	32.7114	31.8386	44.4702	40.9467	87.1661	80.8575	58.071	58.2831	48.7525	56.4908	62.6952	62.8366	50.3922	60.3368	58.5608	62.6888	74.2159	67.9828	77.093	73.3315	75.5853
ATG4C_1	ATG4C		protein_coding	23.3448	19.1675	23.0712	24.9545	18.9553	18.7179	26.5529	21.5747	7.25385	6.59223	26.0938	26.476	25.7359	27.6132	27.2734	25.0816	26.4964	31.3179	29.9263	33.4608	28.1258	28.7802	29.699	30.3701	25.1957
ATG5_1	ATG5		protein_coding	35.1639	33.0192	27.287	30.1008	33.0833	29.3176	37.3782	29.6562	14.4098	9.8464	53.359	53.1933	57.9365	44.9051	53.0503	45.2167	53.4797	57.7155	50.3434	45.0546	44.2118	45.8049	45.3799	47.338	37.1484
ATG7_1	ATG7		protein_coding	12.0796	13.1521	18.1194	17.9749	17.0197	19.3798	17.3113	16.4586	7.19304	6.18737	16.7798	15.965	18.5117	16.2011	17.6063	13.6371	19.7263	18.6224	17.8696	17.1549	18.0431	16.7439	15.721	15.9725	14.0226
ATG9A_1	ATG9A		protein_coding	21.1179	21.2377	22.9373	24.6524	21.2263	24.5616	22.2075	28.7321	21.1371	21.1028	31.5303	35.1098	34.6639	33.144	36.7362	41.9718	33.7241	30.8858	34.1999	36.6999	34.4937	37.6024	32.3377	36.2207	35.9733
ATIC_1	ATIC		protein_coding	167.709	181.029	290.542	286.636	251.974	251.296	328.159	284.84	64.1604	73.8333	267.629	230.04	288.397	239.013	247.512	263.791	268.376	279.867	260.912	281.455	300.872	288.887	217.661	262.324	272.744
ATL1_1	ATL1		protein_coding	51.5993	48.4356	24.9982	27.3264	46.2095	52.3538	25.4014	23.6667	10.6311	6.69778	48.9475	48.3663	48.0553	46.1063	52.9473	53.8914	42.9526	53.7535	43.2696	40.2311	38.4681	43.7209	32.1841	37.1035	42.1962
ATL2_1	ATL2		protein_coding	38.4599	38.0332	60.5593	63.6391	38.2889	40.3553	58.2002	68.4534	43.6179	42.9449	150.045	122.532	109.404	117.659	125.008	125.067	125.176	134.657	112.802	131.753	117.85	123.807	130.672	120.408	116.389
ATM_1	ATM		protein_coding	18.046	16.4927	22.4114	23.8194	15.8071	24.7177	14.9703	22.9285	4.86468	4.24994	14.3325	12.3108	14.9493	14.6812	13.1807	12.5648	15.734	15.9013	15.0513	13.8367	13.8925	12.9997	14.726	16.6299	11.802
ATN1_1	ATN1		protein_coding	74.3245	80.0653	74.8244	81.6993	81.2637	133.211	57.162	100.616	10.6643	12.9421	32.1135	29.2701	31.1564	30.3084	30.9764	33.1028	25.7481	26.0193	30.9394	40.69	33.7914	32.3145	29.9817	32.3886	32.9667
ATOX1_1	ATOX1		protein_coding	135.042	129.811	153.821	132.366	128.002	132.767	108.95	118.142	95.9496	87.5345	237.821	231.987	263.782	208.11	203.643	226.826	202.182	248.016	213.5	180.831	215.804	237.985	200.56	210.637	208.59
ATP10A_1	ATP10A		protein_coding	4.54978	3.91051	5.25832	4.25617	5.49455	7.45465	5.47175	5.09501	2.81107	2.50929	56.3281	50.067	44.6651	58.9071	58.6949	47.9027	58.6747	43.3749	55.1103	39.7748	36.944	37.9304	34.9741	45.5385	37.0325
ATP10B_1	ATP10B		protein_coding	0.042527	0	1.25431	5.80067	0.07975	0.08142	6.0141	5.83171	22.2824	19.5991	9.68115	13.3137	10.3062	13.6835	13.2202	11.1871	10.5421	10.4168	14.2897	10.982	13.9965	11.1898	11.1634	12.0394	9.77849
ATP10D_1	ATP10D		protein_coding	54.9166	61.9462	38.7301	36.7077	25.2802	22.936	19.6956	14.1228	14.7809	16.7403	6.47522	6.92402	7.18024	5.44568	6.44142	4.35755	7.88737	6.07544	6.6106	11.2772	13.9275	11.6121	16.0241	13.8327	12.8127
ATP11A_1	ATP11A		protein_coding	55.6624	42.1849	52.5275	52.5783	34.0873	35.6132	56.0417	44.6505	39.3179	37.8831	26.6231	24.5559	21.8008	29.7313	32.2161	26.4881	33.4166	33.4036	34.0844	31.3701	41.9426	34.0906	36.5241	42.9559	38.0077
ATP11B_1	ATP11B		protein_coding	73.7038	70.3099	79.7176	96.2194	61.8719	56.4574	90.2786	80.4279	42.8074	39.1599	36.2257	56.3986	40.663	53.8839	68.3964	48.7982	53.3933	51.2073	42.556	44.7145	42.8196	46.8686	42.5339	64.0619	46.3752
ATP11C_1	ATP11C		protein_coding	132.095	146.146	41.9779	40.6681	54.4398	70.7184	39.3551	37.3718	9.96568	8.46339	69.5019	121.182	109.452	94.8416	108.732	102.466	89.9502	78.5809	86.8665	93.9038	69.2945	51.3771	70.5725	58.2604	61.4222
ATP12A_1	ATP12A		protein_coding	0	0.014866	0.069788	0.0358	0	0	0.164759	0.419526	0.190957	0.558554	14.0182	10.1491	8.80175	21.1354	18.5319	48.4283	11.8911	16.6569	12.1268	33.174	51.2201	37.2966	10.7138	13.8883	46.0111
ATP13A1_1	ATP13A1		protein_coding	35.0961	33.7509	47.1562	47.3614	34.9541	44.4845	45.133	52.3481	20.5658	23.0861	24.9854	28.8599	27.4803	26.8073	27.117	27.9929	29.2198	26.943	26.6874	32.3745	32.4478	28.4916	29.2048	28.3678	28.975
ATP13A2_1	ATP13A2		protein_coding	14.2677	12.2442	15.2087	19.5409	13.0469	31.9821	18.2098	46.4277	8.23968	10.9684	42.3542	42.7831	37.0604	42.384	39.0594	41.6669	45.8341	40.8634	46.8222	52.5809	43.5243	45.1179	50.4311	54.6264	36.057
ATP13A3_1	ATP13A3		protein_coding	39.8871	37.0909	39.041	40.2925	33.6975	33.4538	53.1942	49.8285	16.9583	15.1373	39.9804	44.4754	39.5239	43.1423	43.5017	44.5062	50.9438	47.5023	46.9247	49.8096	50.4671	42.9931	55.1809	54.7389	46.9844
ATP13A4_1	ATP13A4		protein_coding	0.012248	0	0.292924	0.194509	0	0.019408	0.136026	0.364769	4.85263	4.96952	0.083429	0.216844	0.085848	1.62141	1.06933	0.893019	3.99785	3.96332	6.60797	4.83239	5.62508	2.92926	7.97623	6.62442	4.02904
ATP1A1_1	ATP1A1		protein_coding	165.148	130.089	396.524	356.807	107.392	102.955	268.266	207.169	90.1452	115.043	233.174	257.786	235.855	259.003	252.496	284.274	283.07	228.181	236.912	232.19	225.997	236.952	182.985	198.439	235.542
ATP1A2	ATP1A2		protein_coding	5.57084	4.77029	2.98152	3.50309	20.5465	59.0791	2.37456	3.67168	4.19904	2.71986	50.0863	66.361	80.9303	61.9701	45.0961	51.609	68.1617	57.9703	43.0438	37.5556	23.1725	48.3185	29.9126	34.4278	34.8495
ATP1B1_1	ATP1B1		protein_coding	82.4632	55.1057	277.078	291.737	63.9204	59.9004	323.212	208.086	44.5843	35.2239	192.167	213.975	178.962	202.892	175.982	235.652	252.428	155.107	156.207	138.101	180.111	159.041	109.617	139.818	186.584
ATP1B3_1	ATP1B3		protein_coding	127.723	105.437	37.8759	37.2795	117.675	101.437	106.004	87.654	108.713	90.7671	367.599	381.896	398.509	353.369	360.013	338.208	376.587	383.267	385.219	344.418	343.595	378.021	320.116	353.155	343.289
ATP1B4_1	ATP1B4		protein_coding	0	0	0	0	0.436863	1.25138	0.028387	0	0.454443	0.265509	7.00067	3.99909	8.32182	4.87397	7.14313	7.24362	6.44735	5.38372	6.17496	8.3055	5.36347	7.6475	4.95118	6.40923	6.35808
ATP23_1	ATP23		protein_coding	42.4991	46.6001	55.3114	60.2736	38.2408	32.8377	51.879	40.8897	15.9258	12.7153	45.9062	47.7285	40.0326	41.8179	40.2831	34.5433	42.043	42.4133	44.177	42.69	42.793	38.9085	44.6489	40.4013	38.3744
ATP2A1	ATP2A1		protein_coding	0.267431	0.545651	0.059938	0.37701	0.333261	1.47395	0.270323	1.84786	0.435047	0.039335	0.10122	1.29543	20.2164	0.262739	1.24955	0.563902	1.09264	1.27091	1.80776	1.56098	0.317868	1.48981	0.919319	0.963562	0.301213
ATP2A2_1	ATP2A2		protein_coding	112.055	95.1889	124.546	118.442	112.911	114.792	152.905	126.035	37.8267	38.9118	131.818	146.03	166.006	142.571	134.937	148.33	166.484	120.395	141.496	148.214	116.96	142.158	112.022	135.415	129.103
ATP2A3_1	ATP2A3		protein_coding	8.14093	9.44195	0.399937	0.445382	8.55414	8.44171	0.585016	0.258057	1.02085	1.18974	25.8142	22.6385	25.2638	21.7398	22.3391	29.1643	22.3046	16.3264	20.6854	18.235	17.2131	17.4072	11.0291	14.7318	15.7742
ATP2B1_1	ATP2B1		protein_coding	30.3585	23.1597	138.788	150.154	40.934	64.1295	124.798	104.054	12.6944	8.61893	31.3522	35.6894	31.1692	39.1971	36.1198	34.5195	41.8012	28.0241	36.2094	36.8275	34.7467	28.8311	28.709	38.7527	28.2118
ATP2B2_1	ATP2B2		protein_coding	3.05886	3.71016	3.90964	4.33138	5.72993	11.4793	2.52168	3.44036	1.59663	1.09895	11.7088	11.3705	13.3019	10.6423	14.2954	10.0461	12.1586	8.95867	9.55134	8.51886	5.40881	8.346	6.42856	8.51315	7.84097
ATP2B4_1	ATP2B4		protein_coding	123.999	105.487	123.16	143.789	113.643	155.84	111.89	156.871	30.3421	26.5202	139.207	142.694	145.6	126.963	127.809	146.909	141.686	121.276	132.372	136.676	102.83	122.974	97.2977	117.015	100.887
ATP2C1_1	ATP2C1		protein_coding	50.3778	49.8728	79.1685	85.6462	51.6958	55.9689	99.5642	70.0401	43.5288	30.4994	103.341	105.117	98.6498	99.6055	105.957	92.479	113.656	113.649	114.569	105.256	105.456	103.728	97.8319	106.703	98.6581
ATP2C2_1	ATP2C2		protein_coding	3.37755	2.90123	14.4212	21.5856	10.0532	28.3089	5.22527	9.39672	4.74244	4.21963	8.68673	8.32897	8.92208	7.21929	9.03554	10.1994	11.2171	8.79899	10.363	9.91248	9.80247	9.43539	11.9094	11.6243	9.08404
ATP5B_1	ATP5B		protein_coding	637.678	655.242	748.485	739.942	541.229	600.579	733.625	888.503	357.402	350.243	666.04	753.278	771.903	790.428	736.709	653.437	784.28	676.16	723.74	845.456	795.408	799.954	731.613	685.364	805.869
ATP5C1_1	ATP5C1		protein_coding	349.676	339.34	362.887	332.713	311.052	248.771	465.242	448.821	138.705	124.264	433.745	464.297	439.557	409.931	383.507	351.784	383.516	449.94	434.842	392.744	383.385	376.275	368.567	408.45	335.746
ATP5D_1	ATP5D		protein_coding	234.143	241.012	217.599	219.56	175.581	224.529	177.801	231.286	142.217	121.013	212.742	258.679	279.156	251.372	207.703	271.783	243.543	239.518	240.018	225.112	232.57	289.327	189.583	218.295	290.864
ATP5E_1	ATP5E		protein_coding	138.386	135.178	176.989	149.011	112.648	72.7778	126.671	110.184	53.1126	58.3849	272.156	260.77	252.853	274.11	268.977	240.668	252.54	254.694	274.328	256.743	231.614	262.122	222.864	229.486	228.74
ATP5G1_1	ATP5G1		protein_coding	230.46	215.785	269.655	231.832	177.829	125.758	293.847	253.568	129.269	117.235	328.03	393.913	387.632	401.945	357.339	303.98	339.656	365.101	376.822	378.313	365.466	396.378	337.596	328.798	354.893
ATP5G2_1	ATP5G2		protein_coding	163.926	163.016	215.755	193.828	114.825	126.035	180.894	201.86	104.55	92.2317	152.415	160.811	168.58	179.983	178.508	166.522	162.615	163.338	168.934	196.592	193.513	189.089	163.275	159.911	194.014
ATP5G3_1	ATP5G3		protein_coding	511.294	528.378	478.163	395.799	345.802	294.001	476.339	397.757	131.639	102.133	425.929	515.213	513.746	550.194	483.029	378.291	474.396	477.333	458.505	508.63	490.953	483.018	464.226	440.599	452.092
ATP5H_1	ATP5H		protein_coding	340.144	338.162	387.646	362.599	285.949	254.843	350.533	385.094	212.749	208.252	364.047	395.042	383.411	417.92	396.273	388.321	343.097	382.71	380.705	411.727	373.974	421.927	362.048	371.752	392.88
ATP5J_1	ATP5J		protein_coding	353.435	352.794	387.111	352.822	352.226	273.46	357.255	314.326	168.124	147.924	442.767	451.17	443.451	472.359	461.712	417.228	432.159	471.473	446.393	472.603	467.147	475.129	420.294	466.745	438.852
ATP5J2_1	ATP5J2		protein_coding	433.465	440.759	457.321	377.794	300.159	235.437	361.196	359.736	247.771	213.788	435.836	461.549	459.524	465.938	447.011	384.264	401.368	437.542	429.55	427.46	418.619	446.124	416.81	441.334	387.91
ATP5L_1	ATP5L		protein_coding	241.635	236.223	378.618	327.856	161.928	155.793	245.748	252.811	124.893	102.737	439.783	453.589	447.808	494.156	470.069	406.32	440.084	483.541	453.605	523.789	510.603	507.909	454.685	494.545	479.501
ATP5O_1	ATP5O		protein_coding	313.797	313.552	439.378	440.937	263.37	228.18	359.235	346.107	196.07	168.208	413.423	393.865	405.821	417.325	385.821	346.96	373.342	385.366	380.765	404.64	371.765	379.778	350.436	370.165	380.943
ATP5S_1	ATP5S		protein_coding	14.6387	16.7537	18.5423	23.2275	15.3776	14.0457	18.7612	14.6354	8.71844	9.87777	10.9474	10.8941	11.3087	8.20279	8.80582	10.8809	10.4594	10.9375	11.5806	11.724	13.8081	12.5513	8.37431	9.97057	12.07
ATP5SL_1	ATP5SL		protein_coding	22.1533	20.0715	27.9791	26.8634	17.1624	21.5933	25.5477	29.978	11.6811	10.6793	24.2505	25.1545	24.9744	26.1339	22.2849	27.4911	19.9283	22.1235	23.1099	29.6777	25.8035	28.145	28.9236	24.8833	24.1921
ATP6AP1_1	ATP6AP1		protein_coding	71.8609	55.1815	55.8757	58.5934	34.3047	25.0622	113.154	76.0684	13.49	12.6932	156.099	139.43	137.604	131.29	132.855	103.758	147.206	119.43	136.383	130.034	135.722	114.696	108.895	98.3483	93.513
ATP6AP2_1	ATP6AP2		protein_coding	48.5702	37.3031	59.8013	57.9631	38.6906	36.9642	68.2975	58.7171	52.3011	52.8836	137.052	152.546	143.701	111.275	122.166	117.749	129.508	130.516	132.614	129.065	135.633	133.302	128.532	128.307	124.435
ATP6V0A1_1	ATP6V0A1		protein_coding	32.4741	32.7556	30.8826	34.3316	24.7073	42.1082	30.4993	41.9089	16.5715	16.3497	48.1182	44.4956	43.631	44.4488	57.409	50.5593	51.2327	43.3532	50.3226	50.2708	45.9601	43.3019	40.1119	39.5219	45.653
ATP6V0A2_1	ATP6V0A2		protein_coding	35.8441	30.7114	43.1684	41.7818	30.38	35.6316	62.1455	51.1638	53.6167	50.1381	61.9816	66.4329	56.8913	59.8112	63.0768	63.9601	59.8424	57.442	61.6622	63.4779	63.5234	58.6801	80.6092	79.4282	64.3294
ATP6V0B_1	ATP6V0B		protein_coding	44.7826	43.8001	65.1574	64.8215	41.9583	45.2621	63.5533	64.3857	35.4499	35.8338	83.0165	88.3766	75.9321	87.3842	72.3564	75.7337	73.2874	72.0451	72.4478	78.1575	81.5784	85.2175	83.4136	77.5679	78.4264
ATP6V0C_1	ATP6V0C		protein_coding	161.036	135.601	198.581	186.334	111.726	118.199	246.408	213.869	182.839	168.723	310.134	318.39	303.739	309.805	317.348	321.531	318.074	283.768	314.984	335.619	357.615	283.518	282.135	297.28	324.918
ATP6V0D1_1	ATP6V0D1		protein_coding	38.2847	38.8794	41.2748	49.6917	36.7935	44.4474	41.724	45.6546	30.7974	35.4185	44.4962	40.8585	42.4091	44.1461	45.2757	49.6756	39.4131	42.0494	40.1469	50.9068	45.3217	42.4705	46.8931	43.1534	46.9786
ATP6V0D2_1	ATP6V0D2		protein_coding	0.025004	0.069573	0	0.297554	0.037939	0	0.720113	1.22997	0	0.095542	11.616	9.91737	9.37313	7.96833	12.3278	9.27794	14.0014	16.5415	10.7284	7.86315	8.78126	4.62833	3.37023	5.74707	9.22498
ATP6V0E1_1	ATP6V0E1		protein_coding	42.95	41.2464	42.6364	42.7967	42.8812	38.6661	54.0262	38.4144	43.5157	29.2977	129.799	129.855	120.58	121.004	122.855	119.396	124.741	132.785	126.167	120.509	119.639	120.938	112.051	115.479	116.646
ATP6V0E2_1	ATP6V0E2		protein_coding	7.27236	9.19081	9.25186	10.5437	8.5475	10.1766	9.41396	9.50858	4.90457	4.67638	10.3477	10.1084	9.33582	10.034	8.93079	13.5628	10.577	10.4712	12.6184	13.9234	10.0085	12.2755	14.2455	12.4573	9.3349
ATP6V1A_1	ATP6V1A		protein_coding	61.6068	50.5369	61.3282	57.2937	35.1822	32.2537	63.5594	46.0976	24.7567	23.1758	53.0125	62.506	52.0117	53.7299	56.1832	59.693	54.4528	53.4458	50.2487	51.5716	55.2646	46.6487	52.1829	50.7825	48.0736
ATP6V1B2_1	ATP6V1B2		protein_coding	79.8988	76.9323	89.802	90.4324	61.4495	53.6405	92.5129	73.6341	35.4349	32.1154	77.0735	82.4352	79.4852	78.2834	77.0737	84.1249	80.8804	78.4176	75.337	85.9206	89.6122	80.21	78.398	77.3139	79.0209
ATP6V1C1_1	ATP6V1C1		protein_coding	32.3794	27.0161	28.0701	24.9789	26.9145	22.4961	34.6234	24.5735	17.6917	15.8094	62.1179	63.3803	55.6039	54.102	54.5483	54.6926	58.4622	64.3825	56.0536	53.1397	60.9451	56.7549	51.0427	61.553	48.9633
ATP6V1C2_1	ATP6V1C2		protein_coding	30.2277	41.6862	2.42529	2.38085	7.17599	9.17775	5.87905	5.01191	0.366729	0.597132	2.89299	2.21424	3.05081	3.11025	3.29073	2.15729	3.26094	4.21842	2.79138	5.67883	4.37753	4.46145	1.71717	2.0765	2.56351
ATP6V1D_1	ATP6V1D		protein_coding	89.2586	93.4748	58.0513	62.2965	85.813	70.7269	66.5862	50.3888	36.7417	27.9902	122.879	127.713	126.598	115.434	116.675	110.603	113.587	116.559	113.131	109.461	108.297	109.802	106.511	106.651	99.8269
ATP6V1E1_1	ATP6V1E1		protein_coding	78.2332	75.7966	64.5132	67.5723	66.6592	56.0207	87.15	62.1413	33.9531	27.2685	77.3443	82.7798	83.042	86.7347	82.1401	79.0577	79.7046	81.8708	80.9679	89.5905	97.0453	85.4043	83.977	80.3005	86.0842
ATP6V1G1_1	ATP6V1G1		protein_coding	150.916	151.373	163.295	156.133	111.668	84.5782	177.139	129.567	79.3468	68.0812	229.544	222.312	206.065	223.608	207.511	201.472	235.868	252.542	218.91	242.863	258.7	232.609	237.803	244.498	230.411
ATP6V1G3_1	ATP6V1G3		protein_coding	0.032186	0.099977	0	0	1.98792	3.40579	0	0	0.703313	0.255272	0.409682	0.061888	0.410098	0.21798	0.116762	0.229054	0.254754	0.691496	0.157028	0	0.310334	0	0.148408	0.279638	0
ATP6V1H_1	ATP6V1H		protein_coding	14.6323	14.3324	13.346	12.1252	15.8202	10.7478	15.612	11.1662	6.46006	5.67975	23.8531	25.4036	22.3767	23.1557	21.9166	19.8816	22.8028	21.0523	23.3872	27.7688	29.168	23.6136	21.7126	22.346	21.1714
ATP7A_1	ATP7A		protein_coding	28.5618	28.1462	25.0092	26.3685	33.0002	36.2451	30.7085	27.127	15.5366	12.2409	28.5417	29.7871	29.2522	24.0649	32.1011	31.0687	31.7758	31.0083	33.796	30.749	31.7736	26.9287	30.9105	32.1362	28.2884
ATP7B_1	ATP7B		protein_coding	1.03297	0.20467	3.48938	2.11858	0.017214	0.023184	4.22776	3.95927	7.51067	6.27645	0	0.026676	0.015252	0	0.012556	0.024708	0.013726	0.083394	0.107074	0.698742	1.00579	0.663905	1.37346	1.67794	2.57351
ATP8A1_1	ATP8A1		protein_coding	13.874	13.4986	0.998524	1.17884	9.86986	7.52062	2.57077	1.07994	0.655939	1.02389	9.50315	10.7795	10.2852	10.82	13.8059	9.55149	17.7287	11.0064	11.9595	10.8519	10.3193	10.5722	6.37757	8.7623	8.68451
ATP8B2_1	ATP8B2		protein_coding	33.5743	30.999	39.5845	44.7197	40.724	64.7777	32.5508	49.3913	16.7929	19.6173	53.4779	53.985	49.8899	50.0187	51.4137	66.2841	50.9373	46.8055	49.7806	49.2756	44.2013	45.9445	41.5693	46.8642	45.4078
ATP8B3_1	ATP8B3		protein_coding	0.277366	0.20438	0.510029	0.655293	0.47223	2.03126	1.01466	2.07862	0.405704	0.717705	5.92114	4.79219	5.55538	6.59267	7.21166	8.04911	6.97942	6.75644	6.57963	6.64341	5.45002	7.09725	6.45938	6.01131	4.6574
ATP9A_1	ATP9A		protein_coding	1.91243	1.30552	7.08996	7.41298	1.43925	4.63682	7.66949	11.5497	21.5927	18.8249	18.4226	18.5855	18.1612	17.2061	16.1968	18.4752	18.1335	17.2781	17.9217	17.6439	19.5448	16.7366	20.1343	20.1524	17.7117
ATP9B_1	ATP9B		protein_coding	13.2794	12.0203	19.1947	18.6951	11.8175	17.532	14.7457	17.0124	9.42543	9.02134	16.1184	17.5716	14.5493	15.503	16.9233	16.7351	18.0342	16.8252	16.5051	17.5493	16.012	16.7882	18.5607	19.7646	16.0916
ATPAF1_1	ATPAF1		protein_coding	17.6039	20.783	19.7712	21.9932	46.1483	48.1055	22.942	22.4706	8.56141	6.65462	18.741	18.9114	17.0996	16.5283	18.3086	17.6641	19.1804	19.168	19.467	21.2475	20.3283	22.627	20.1733	22.8622	17.6204
ATPAF2_1	ATPAF2		protein_coding	15.5344	15.2715	20.26	21.8021	13.8331	14.177	20.6941	20.7077	7.47751	7.62877	18.5637	19.8169	21.4399	18.9703	22.1265	20.7748	17.9441	18.9394	19.8992	21.6377	21.1501	23.737	20.8496	20.7961	20.0949
ATPIF1_1	ATPIF1		protein_coding	193.663	181.172	191.141	170.422	125.142	83.6106	151.85	139.233	121.851	96.0434	346.91	355.343	357.899	368.756	362.589	368.076	338.123	352.162	330.395	348.887	318.381	378.836	299.195	309.277	325.201
ATR_1	ATR		protein_coding	21.7439	20.1173	22.4842	23.5835	15.5641	17.4214	26.4613	32.2148	3.30704	2.78872	13.2342	14.9168	13.4854	13.172	13.0779	8.30454	14.0669	12.8089	13.9507	14.7812	12.1354	12.0581	13.5649	13.5635	10.6296
ATRAID_1	ATRAID		protein_coding	32.0696	26.7689	33.607	29.2624	24.3775	37.8901	28.6632	48.7171	20.7289	19.7546	98.461	91.4573	80.4225	86.5021	99.7579	94.0364	91.344	82.8763	84.5056	83.5713	75.9353	97.936	84.7824	81.1023	81.9833
ATRIP_1	ATRIP		protein_coding	22.5807	20.6014	25.2624	28.8967	16.6358	21.5088	26.9809	40.2287	6.63404	5.6373	21.5083	24.8553	20.3529	22.8821	22.6217	21.0165	23.3855	21.8454	22.2129	28.2891	25.2894	21.701	25.4757	28.1676	21.1542
ATRN_1	ATRN		protein_coding	43.6948	42.2443	50.0492	48.6263	52.7064	71.6909	69.2375	66.5456	43.5222	48.458	139.285	113.217	124.085	113.778	123.704	123.674	121.954	115.046	116.255	110.684	106.178	110.537	78.2149	93.9142	99.6639
ATRNL1_1	ATRNL1		protein_coding	9.2826	8.35612	10.159	11.01	9.80625	12.9889	12.0111	13.0462	1.47691	0.8704	9.66837	8.33348	9.47785	9.42457	11.7875	7.3215	10.111	9.27053	9.99002	7.49658	5.34898	6.99033	5.10103	6.52298	5.76688
ATRX_1	ATRX		protein_coding	107.424	109.03	92.158	104.598	109.995	116.86	115.307	94.943	21.1404	19.5657	38.4857	38.7719	41.0257	37.7983	38.5424	39.1851	46.4132	42.983	42.98	49.0252	45.7796	39.3666	42.161	47.3167	38.219
ATVR1_1	ATVR1		protein_coding	83.2107	77.9869	69.5752	69.7342	89.7158	83.1103	62.4988	51.4785	69.6509	57.1575	112.345	117.401	106.616	111.673	118.468	107.632	120.616	112.484	117.772	121.688	122.203	117.575	120.466	116.531	120.467
ATXN10_1	ATXN10		protein_coding	19.8963	18.0848	20.3072	16.7449	23.2983	22.0425	22.3128	23.7634	5.86832	4.36547	27.0139	29.6105	25.8697	26.4959	24.836	21.7006	22.4956	28.3833	25.1789	29.4983	30.1896	26.9243	28.1402	28.1184	22.8289
ATXN1L_1	ATXN1L		protein_coding	36.3012	34.4548	33.3077	35.0898	35.4891	38.1517	30.9533	34.0221	14.1969	14.7455	38.2408	40.5027	40.9868	37.4949	42.1762	40.4754	42.8742	38.1548	41.7482	42.8655	38.0276	38.5242	35.1797	39.9963	37.2387
ATXN2_1	ATXN2		protein_coding	88.7985	94.7824	92.6248	96.7842	72.0171	93.6916	91.8567	96.3953	30.0203	34.0759	32.3245	36.5118	34.601	37.4861	39.2179	37.2769	38.2646	34.6687	38.3426	42.9711	41.8914	37.5747	44.002	39.8898	37.1658
ATXN3_1	ATXN3		protein_coding	53.7128	50.4398	61.7785	68.6748	56.3358	55.6074	60.3165	57.0602	81.6078	88.2186	51.7213	53.5399	56.5573	45.9766	56.1237	49.6003	61.4434	64.8388	55.6422	61.2599	73.3914	54.2652	67.3257	66.1316	58.772
ATXN7_1	ATXN7		protein_coding	8.2228	8.54559	15.3228	13.8327	8.75536	15.5269	11.0344	17.1704	6.88328	6.57745	14.7322	13.8451	15.3663	13.1373	14.1946	13.896	16.2338	14.2248	15.8274	14.5732	13.1241	14.2813	14.2905	14.0959	13.3242
ATXN7L1_1	ATXN7L1		protein_coding	11.8793	12.1921	14.0536	15.4261	21.2809	45.0002	15.1379	22.9679	8.89311	8.85224	15.7308	14.9351	13.9168	13.4493	14.6946	14.8415	16.2687	15.2531	15.1016	15.0451	15.1199	14.1849	15.1658	18.5125	13.1685
ATXN7L2_1	ATXN7L2		protein_coding	8.47447	7.31466	6.74558	7.54994	8.52269	15.3592	8.26463	12.8304	9.4808	9.49906	8.62379	7.75283	8.14818	9.11179	10.2963	12.1005	9.34559	7.53753	8.34084	8.84067	8.73927	9.39288	9.75737	9.05792	8.41082
AUP1_1	AUP1		protein_coding	47.8543	46.0681	53.642	52.0512	36.1975	52.5659	53.6379	79.9595	30.0959	28.638	88.8866	84.4113	77.6564	90.8667	92.5635	93.5746	85.9629	84.1754	92.1752	87.4865	86.1926	94.5103	72.5752	81.0479	87.1575
AURKAIP1_1	AURKAIP1		protein_coding	63.922	65.7924	54.1954	48.24	47.8157	39.0779	54.1195	56.1294	33.9012	30.9525	53.7682	71.1863	58.463	63.1454	59.4822	54.6265	67.9825	65.7366	60.9809	69.2613	62.4886	62.8489	79.9967	75.0327	69.3774
AURKB_1	AURKB		protein_coding	72.6005	70.3188	53.8959	47.3464	41.5917	26.1212	81.84	65.4206	4.29795	3.32743	30.5612	33.5472	34.7984	39.1009	41.3147	27.2622	38.8113	42.6619	37.672	50.8313	54.0117	38.7652	41.4072	36.6895	33.6825
AUTS2_1	AUTS2		protein_coding	82.3835	57.8771	97.6626	100.687	93.3408	115.712	103.135	135.843	23.8441	28.1104	32.0634	28.8062	31.4792	26.3389	26.088	30.1049	32.4175	34.3141	36.2629	39.5314	37.2282	34.4012	30.2736	38.1343	34.3683
AvBD1_1	AvBD1		protein_coding	0	0.2368	0	0	0	0.549164	0	0	5.78157	3.4518	10.7223	8.21896	1.2542	4.03369	3.69632	1.64714	3.35665	3.04868	2.26221	10.8559	1.83314	6.51764	0.4399	3.88921	5.36017
AvBD10_1	AvBD10		protein_coding	0	0	0	0	0	0	0	0	0	0	0	0.658886	0.315063	1.95233	9.00468	0	2.94227	2.84074	3.56069	4.77924	1.35275	1.95564	0	0	2.10162
AvBD14_1	AvBD14		protein_coding	0.335497	0.821505	0	0.488777	0.798958	0.658195	0.115707	0.227935	0.040553	0.102072	198.312	154.292	168.368	126.248	101.913	139.924	113.705	111.138	96.5124	60.566	61.1656	97.6275	58.1167	91.191	64.6962
AvBD5_1	AvBD5		protein_coding	3.38592	1.37517	13.7963	1.34147	2.24208	3.69565	3.49833	3.82814	0.486994	0.128501	9.67163	5.06057	8.68347	13.8094	9.30884	5.04655	6.16189	6.26384	4.80048	6.93809	4.48109	4.58977	2.25226	2.51896	4.52952
AvBD7_1	AvBD7		protein_coding	0	0	0	0	0	0	0	0	5.07132	3.45737	6.12945	6.17617	0.515478	0.322926	1.08646	0.472954	0.632181	2.4352	0.508433	5.54325	0.949836	6.53766	0	0.907857	3.24728
AvBD8_1	AvBD8		protein_coding	0	0	0	0	0	0	0	0	0	0	0	0.548572	0.796265	6.88718	8.42273	0	2.15603	1.87531	3.44754	6.52929	1.81703	3.31792	0.599843	1.29666	1.92659
AVEN_1	AVEN		protein_coding	31.6302	27.832	29.4757	32.001	22.0069	21.1458	31.5306	30.9739	13.5689	13.5503	41.6929	37.0101	40.3288	37.7018	30.689	37.1954	33.5942	33.3935	31.0528	33.9293	31.4398	36.1787	28.5154	31.9351	33.2035
AVL9_1	AVL9		protein_coding	12.2464	11.4087	18.2867	18.1472	11.566	16.2275	17.0351	20.3797	11.7952	9.73952	20.0234	22.1783	21.3882	19.2122	23.1497	19.8428	20.8433	21.3701	20.4785	20.3507	20.5176	19.9593	26.0041	21.929	21.5104
AVP_1	AVP		protein_coding	0	0	0	0	0	0.787595	0	0	0.041814	0.083464	5.71459	1.31166	7.24289	4.0154	4.4502	3.36339	3.54415	5.74314	10.4768	6.11829	1.60679	4.13972	1.07313	1.10456	7.17643
AVPI1_1	AVPI1		protein_coding	17.5661	14.7888	18.6943	14.1714	7.21228	11.4209	18.2553	39.7304	11.7449	11.326	91.2166	96.6026	77.1382	91.1905	85.8213	80.7744	81.9993	86.8581	83.7167	97.5751	87.1058	85.535	85.1847	74.373	85.9988
AVPR2_1	AVPR2		protein_coding	0.224832	0.078986	0	0	5.69617	2.64932	0	0	1.75594	1.24415	11.321	13.7523	8.96364	11.2198	12.0031	12.8017	14.7381	9.70216	13.9325	5.5408	7.19499	10.0977	10.023	12.4604	10.6435
AWAT1_1	AWAT1		protein_coding	0.37233	0.329804	0.947125	1.15944	0.009162	0.531894	0.113416	1.00894	0.751561	0.856206	0.967024	1.09178	2.02215	1.69387	1.41961	2.04985	1.60522	1.43517	1.65102	1.71119	0.979197	2.57884	3.42218	1.30855	0.925916
AXIN1_1	AXIN1		protein_coding	40.7946	35.9613	44.0311	46.6499	52.7025	73.0664	38.3114	54.4086	16.7711	15.9733	27.731	29.9259	26.3727	28.8201	28.7011	32.7408	29.4296	30.0901	27.4262	34.8775	32.8503	36.6185	30.93	36.7578	33.7309
AXIN2_1	AXIN2		protein_coding	88.8265	80.2391	141.603	134.225	102.145	144.151	58.4358	70.8253	25.6232	32.6736	39.4844	42.3859	41.3241	40.2961	46.473	42.5424	38.7935	52.7697	48.2534	55.8486	56.445	55.7111	51.6543	54.8189	54.0707
AXL_1	AXL		protein_coding	72.2911	53.0807	92.4815	80.1871	35.0168	35.833	28.9883	31.4343	62.3447	74.0444	53.007	51.4468	49.4726	46.2611	52.7512	56.9854	44.1537	46.9718	48.1356	64.2475	67.7942	62.9136	83.7437	70.0511	77.1249
AZI2_1	AZI2		protein_coding	31.1326	33.2665	31.1524	35.9855	27.4589	28.2687	28.1267	26.2229	20.9757	16.6139	53.0482	57.9666	57.6368	53.2205	53.2591	55.6793	56.5519	56.7581	55.9618	51.4588	54.3848	51.6471	54.2759	59.522	46.8681
AZIN1_1	AZIN1		protein_coding	84.4983	83.2751	20.9329	20.7855	78.2739	74.0762	46.3273	43.1957	19.7337	16.6569	139.192	143.153	136.392	154.666	145.429	135.804	136.51	108.715	126.485	115.688	99.6085	102.88	91.962	103.931	85.4206
AZIN2_1	AZIN2		protein_coding	4.22433	4.93914	5.04078	4.96278	6.12127	12.1307	3.59096	9.32853	1.90607	2.23495	11.8279	10.918	13.58	18.4541	14.7764	13.5289	13.6834	12.3572	11.5704	13.7466	9.95766	13.8381	7.24584	8.11606	10.8093
B2M_1	B2M		protein_coding	33.4262	35.3073	19.8154	24.7101	39.6403	34.4614	41.2228	43.0471	25.6497	16.4023	454.029	310.941	337.54	311.125	365.579	334.317	428.073	421.136	357.893	328.025	471.229	338.524	203.384	256.597	289.425
B3GALNT1_1	B3GALNT1		protein_coding	5.46628	3.95057	3.99735	3.82152	3.53945	5.10874	6.09943	5.49918	8.55047	4.97942	45.2643	49.806	47.1726	37.9461	48.026	47.7706	45.0141	50.384	38.1158	36.1476	40.4499	37.6444	36.9049	33.5671	36.0451
B3GALNT2_1	B3GALNT2		protein_coding	13.2724	10.9993	41.5796	45.547	10.6389	11.4282	30.9193	23.8378	13.6005	11.7562	35.7604	42.2644	38.5784	38.4212	38.2689	36.5327	44.913	42.2823	45.5782	45.8243	42.5148	41.8524	47.1767	48.2974	45.3364
B3GALT1_1	B3GALT1		protein_coding	7.9566	7.97853	4.05596	4.27525	6.40971	5.98843	3.15804	2.6928	0.733511	0.628972	2.74739	3.01935	2.49103	3.2522	2.55217	2.43199	2.49442	2.93786	2.46341	3.04981	1.21982	2.37163	1.7949	2.62836	1.96256
B3GALT2_1	B3GALT2		protein_coding	0.845671	2.04015	0.266855	0.226727	7.09182	6.71171	0.479935	0.656947	0.46401	0.43904	5.3942	7.53744	6.56935	4.35676	6.89668	4.98779	4.24452	4.18156	4.50916	5.92535	3.90084	4.94847	2.5293	4.3715	4.0577
B3GALT6_1	B3GALT6		protein_coding	17.6527	14.924	15.1677	16.8065	13.5567	14.1724	19.4174	16.1084	3.86865	3.97501	10.7691	8.24586	10.1341	9.95899	9.97023	8.10652	9.71375	10.086	10.0267	12.9639	11.2468	10.5722	9.57962	10.0327	8.89249
B3GAT1_1	B3GAT1		protein_coding	3.70438	1.1108	0.636613	0.321487	2.42829	2.91858	0.335958	0.134376	0.14451	0.04414	0.745012	0.36696	0.44455	0.422165	0.352492	0.182653	0.697297	1.13752	1.30581	1.12674	1.48135	0.865024	0.896725	0.724573	0.659232
B3GAT1L_1	B3GAT1L		protein_coding	7.78389	5.58291	5.54381	2.40891	8.97155	9.09025	4.56507	2.66343	1.34639	0.948619	16.6455	20.6108	21.9039	13.1899	13.3878	18.0397	13.2053	12.4962	12.2893	10.3156	6.94448	12.1132	8.08358	10.6147	7.76226
B3GAT2_1	B3GAT2		protein_coding	1.25863	1.91864	0.466505	0.389555	17.8841	8.56103	0.489934	0.815774	0.265079	0.142717	0.132028	0.133161	0.572739	0.508662	0.821525	0.436413	1.13679	1.38536	1.19563	4.7476	4.62975	4.4173	3.87619	4.34718	3.37879
B3GAT3_1	B3GAT3		protein_coding	35.8021	40.0056	15.7877	15.4834	23.8354	35.3461	15.8663	28.1121	9.77424	8.21928	80.8959	67.6856	61.2582	57.7057	68.8455	65.7775	55.9	75.985	56.2025	50.5798	42.7868	68.0291	43.3975	45.4039	45.2098
B3GLCT_1	B3GLCT		protein_coding	29.1151	29.5381	12.1885	15.2209	31.5322	26.0545	10.0237	7.24578	3.39487	2.00508	37.9876	40.7555	34.5378	37.4058	44.4489	42.1625	47.6108	37.9823	39.0185	38.8294	33.8057	37.6216	23.8966	30.6859	29.8494
B3GNT2_1	B3GNT2		protein_coding	5.80463	4.34499	24.6302	22.7154	9.97115	9.18156	24.2643	24.0785	20.0541	22.0641	31.5353	29.719	29.7596	34.7807	29.455	30.3035	32.4428	35.7433	33.0811	34.6256	39.9282	34.1336	34.8989	45.7145	33.4801
B3GNT5_1	B3GNT5		protein_coding	25.2434	22.103	14.5095	11.902	39.341	29.2892	24.4097	22.0805	18.6891	14.8429	12.4298	16.1434	13.7069	14.8817	16.5956	15.2564	15.248	20.5973	18.1487	25.2754	25.6184	19.4113	26.2	27.1757	19.6508
B3GNT7_1	B3GNT7		protein_coding	7.0962	4.34998	6.70913	5.14005	1.50566	3.23118	5.56023	9.9604	0.901734	0.713383	1.04392	2.47454	1.78199	0.823097	1.09668	1.35038	1.29991	1.09768	1.02471	2.43683	1.4705	1.37719	1.75161	1.11235	1.85781
B3GNT9_1	B3GNT9		protein_coding	17.2024	15.4138	4.48426	5.47343	15.4633	16.7796	9.25449	5.16293	14.7771	8.53318	47.563	48.512	41.3328	42.801	60.5245	46.3134	46.4415	52.9129	62.1544	46.6427	45.5382	39.1229	31.8304	39.414	45.4508
B3GNTL1_1	B3GNTL1		protein_coding	34.6681	50.3301	6.83756	7.72444	20.0461	28.5629	8.60228	15.1576	4.4074	4.11887	14.6328	14.9242	15.5449	14.7545	14.5335	14.597	17.2716	17.126	17.1599	12.5176	15.9973	13.9503	15.1676	19.7891	17.4369
B4GALNT3_1	B4GALNT3		protein_coding	7.61774	8.13159	21.6726	27.3816	2.26239	2.71636	31.5403	37.2277	20.2077	20.5476	11.8516	12.4302	13.417	13.4103	12.4968	16.0039	18.2931	18.3367	20.1819	20.0006	21.4061	18.5452	22.4178	23.1221	19.4558
B4GALNT4_1	B4GALNT4		protein_coding	66.043	61.3222	89.827	81.0518	52.9806	55.7373	113.558	109.671	12.6354	9.64548	17.9411	19.7948	18.8248	20.8207	20.0079	18.3664	20.5748	19.8522	23.0824	29.8997	26.6513	23.6977	30.9137	26.1293	24.927
B4GALT2_1	B4GALT2		protein_coding	98.5846	91.7335	117.243	127.778	95.8598	111.298	138.42	164.501	46.3894	46.8934	116.674	117.31	121.113	117.73	121.546	132.988	114.156	112.288	117.013	124.194	121.394	122.586	121.6	120.816	118.991
B4GALT3_1	B4GALT3		protein_coding	36.7034	37.2207	38.9239	48.0639	37.2061	52.2638	33.5676	46.9938	22.6912	23.0699	39.4447	35.4921	39.3775	36.2205	38.4178	45.87	38.4811	40.3751	39.6955	44.4144	37.4977	44.272	34.2474	37.7668	39.9575
B4GALT4_1	B4GALT4		protein_coding	33.9489	25.4297	27.3008	26.0398	17.4943	20.2974	24.0087	25.3983	8.34037	5.45496	24.4142	26.5949	26.0765	22.0032	25.969	26.7224	25.1581	21.6644	27.8274	24.7653	21.4509	23.5355	27.3051	25.3751	25.5058
B4GALT5_1	B4GALT5		protein_coding	12.8363	12.2979	9.28794	9.79589	13.3231	16.2517	16.3343	17.0919	9.89538	8.49151	27.6645	27.7659	27.6691	27.128	28.9829	28.3456	29.3962	28.2975	27.4788	27.3601	27.6864	25.1951	26.982	28.0379	25.684
B4GALT6_1	B4GALT6		protein_coding	17.8527	14.5337	11.3277	12.5761	10.7426	7.31207	28.2371	15.2364	8.63162	4.53106	4.64185	4.80317	3.94469	5.01	4.07845	4.17065	5.09622	4.77584	6.15187	7.69034	6.66442	6.59641	9.95248	8.26869	7.34133
B4GALT7_1	B4GALT7		protein_coding	41.247	43.8839	37.9944	41.7277	28.5348	38.2801	34.7323	41.3014	21.7748	22.0342	57.4288	59.0994	54.0481	50.6295	59.9015	55.8717	54.3987	55.4226	51.7495	48.7571	50.14	54.8141	49.6691	45.0437	50.3929
B4GALTL_1	B4GALTL		protein_coding	15.8585	14.7218	13.4514	11.5196	16.2437	15.1266	13.1594	12.5031	3.5441	2.84792	11.8255	11.433	12.3743	13.4651	14.1473	11.9911	11.9311	12.2717	13.0354	12.3285	13.3243	12.0912	11.8309	10.6181	11.1072
B9D1_1	B9D1		protein_coding	21.2425	19.6591	14.108	14.2126	17.4865	17.5262	16.9483	16.4247	3.82174	2.583	13.28	12.6689	12.8316	13.1053	13.6855	12.0478	13.2422	14.3448	14.5522	14.0166	13.8713	11.4748	11.7231	12.7677	10.7383
B9D2_1	B9D2		protein_coding	8.909	7.84073	7.02736	7.26649	9.64067	18.8602	7.7485	11.5537	1.87422	1.72991	7.40757	6.64253	8.09473	5.2525	7.45857	7.73389	7.93892	6.59858	6.39175	9.96234	7.75315	6.07873	6.51734	7.29098	7.81239
BAALC_1	BAALC		protein_coding	3.16204	3.74422	1.10087	0.816784	2.06768	1.43647	7.38721	6.51846	1.50739	1.23331	2.3754	2.30191	2.09139	2.851	2.67543	2.01372	2.21676	3.02203	2.58378	4.29808	5.20311	4.97185	3.94053	5.39064	4.32076
BAAT_1	BAAT		protein_coding	0.493326	0.642321	0.603849	1.13352	0.35501	1.28901	1.61916	1.95111	0.568321	0.772243	1.99666	1.90152	1.9004	2.2435	2.0599	2.52787	1.42664	1.78385	2.46188	2.34394	3.56053	2.2113	2.38653	1.40618	1.40529
BABAM1_1	BABAM1		protein_coding	94.8381	98.3714	97.3796	88.4804	74.4037	96.9751	100.663	135.314	48.1941	43.4319	80.8192	80.7259	89.7062	87.4312	91.2719	81.0738	80.4395	85.1842	85.4634	105.189	92.0582	94.1473	82.2592	91.9666	91.6883
BACE1_1	BACE1		protein_coding	55.3622	51.2746	49.2912	55.6639	52.6188	59.3061	61.1257	64.233	23.5705	25.9022	61.0775	63.3361	62.0743	65.2697	64.4153	67.4635	62.9908	56.6785	64.5762	67.0197	60.7107	58.8173	62.1639	66.5079	59.6977
BACE2_1	BACE2		protein_coding	28.2073	16.6202	35.2032	29.6932	14.3853	13.5271	32.3598	22.2727	3.97386	2.53439	20.4352	19.8252	21.5909	13.3549	17.8544	17.1841	16.5616	19.8728	16.9984	18.7108	15.1507	18.6777	11.9581	10.9784	13.9802
BAG1_1	BAG1		protein_coding	26.0791	24.0933	21.4133	20.0506	25.8226	21.6877	26.2458	24.9358	7.40362	8.09996	36.4538	45.5286	38.5526	35.0354	36.6994	37.529	35.4587	42.4691	39.6607	42.0443	36.6633	36.9855	37.5021	44.9798	35.9246
BAG2_1	BAG2		protein_coding	22.6446	17.7938	17.3297	14.2227	23	23.7352	18.0524	15.4839	131.86	125.802	174.767	189.25	191.695	146.894	125.72	205.426	129.907	105.959	130.825	144.677	128.348	173.467	150.251	157.532	144.998
BAG3_1	BAG3		protein_coding	44.7925	46.2286	28.7103	36.8422	40.2317	33.954	47.8108	47.63	118.875	107.396	51.5186	72.6796	70.274	62.3303	72.2589	76.0901	68.6557	54.4927	66.4235	56.0419	58.9017	53.9709	85.1583	88.7543	53.7361
BAG4_1	BAG4		protein_coding	28.8472	30.112	22.2014	25.8784	28.1033	31.2307	22.2992	21.5353	7.14131	6.37157	26.0319	26.1107	25.2567	27.4216	28.4311	30.4747	26.7157	24.0736	25.2982	25.3869	21.5799	23.6246	22.3113	24.0948	19.4881
BAG5_1	BAG5		protein_coding	12.1126	12.2569	8.85335	9.39649	12.4076	9.14808	10.6445	7.10433	14.1205	14.1247	18.4245	21.1094	21.7265	18.5321	18.3258	20.8031	18.3383	22.7713	18.8402	20.3866	20.1468	18.1037	19.0434	18.3794	17.65
BAHCC1_1	BAHCC1		protein_coding	47.2576	45.9084	116.424	113.957	45.5138	98.9299	61.0136	118.69	13.9652	15.2612	55.9823	47.7928	51.5696	48.5359	47.9983	59.5095	43.6329	41.3622	47.4182	44.6806	34.0234	41.7454	35.6617	44.5201	36.1321
BAHD1_1	BAHD1		protein_coding	19.3738	25.6449	30.7096	38.4991	29.4697	32.6801	31.9453	31.4194	23.2923	19.6362	38.591	33.9474	27.8356	39.1606	39.3637	39.0388	32.5245	37.0485	42.4604	32.2774	42.2187	31.3515	32.3155	40.4384	29.6415
BAIAP2_1	BAIAP2		protein_coding	6.92153	5.54211	25.1038	30.3655	8.70044	11.4733	22.9221	58.0453	47.5914	59.0692	45.2499	41.553	39.2744	45.485	38.9039	46.9799	46.1426	38.5717	45.1787	45.9696	40.6151	40.0586	42.587	42.6557	41.6994
BAIAP2L1_1	BAIAP2L1		protein_coding	2.58042	1.50163	17.7809	18.9349	3.06264	2.70672	13.887	21.4227	45.6914	49.5295	42.1624	54.74	40.937	44.421	42.8625	49.5672	55.5938	40.8201	42.5815	42.2099	53.4138	47.3428	62.0591	48.8653	53.0852
BAK1_1	BAK1		protein_coding	49.028	43.3413	23.832	30.888	43.5055	42.9599	27.8872	27.9978	8.41631	7.05611	38.4527	40.7498	36.2264	39.1766	46.9868	42.9097	37.1113	37.1036	38.1233	39.5686	40.4301	35.3916	34.4836	35.0739	34.7288
BAMBI_1	BAMBI		protein_coding	14.7673	13.2662	79.7363	107.206	24.6317	26.1036	60.4447	86.9657	545.605	548.517	17.8091	19.6711	21.7811	35.903	25.287	21.4706	22.2333	26.8963	26.3225	166.316	232.367	202.234	333.721	219.764	297.403
BANP_1	BANP		protein_coding	12.0766	12.0539	14.7675	14.8632	13.0553	17.3665	13.7221	19.3808	4.79974	3.66115	20.3809	18.4471	20.5578	17.0952	17.1767	17.5724	16.1686	20.3659	18.1186	18.2061	15.6357	18.2366	13.2633	14.9621	13.5306
BAP1_1	BAP1		protein_coding	52.5443	49.7386	54.5798	56.2936	49.0929	66.894	43.8198	63.4483	16.7794	16.2684	46.7804	47.473	44.141	49.1389	51.3592	50.2326	46.581	49.5035	48.0803	50.5909	45.516	51.2468	43.8959	50.3414	43.2692
BARD1_1	BARD1		protein_coding	20.202	18.7439	29.6214	26.5757	14.0483	12.7754	30.8732	35.1372	1.83656	2.07206	11.2983	12.8958	10.6894	13.6022	12.1551	8.07575	12.2835	12.1583	13.4802	14.9298	12.9633	11.0371	12.9408	14.0125	10.6594
BASP1_1	BASP1		protein_coding	890.966	1005.58	508.489	557.929	646.003	655.812	332.095	334.906	48.362	58.0208	102.34	115.327	106.635	103.402	110.465	91.8238	126.903	144.318	143.649	224.756	235.833	185.715	188.384	193.978	199.171
BAZ1A_1	BAZ1A		protein_coding	100.941	103.88	119.612	128.09	91.2838	115.889	115.288	132.475	46.3989	52.7154	45.4486	53.2683	51.4497	52.8538	57.5498	55.9167	55.7827	52.1761	61.3194	73.3086	83.0904	63.4456	84.8191	79.8372	65.5211
BAZ1B_1	BAZ1B		protein_coding	83.2868	84.0352	98.2827	102.738	85.9156	94.3202	102.394	117.568	17.1397	17.7088	50.7217	60.6981	54.594	57.8808	61.3487	53.1127	59.8631	54.8435	57.2653	64.3981	59.5082	54.7458	54.0044	55.7067	53.5593
BBIP1_1	BBIP1		protein_coding	43.2439	46.9265	92.9224	82.3914	43.2311	49.9604	57.807	59.3033	12.0749	11.5403	42.7671	40.075	48.6487	47.2527	52.779	37.1951	42.9138	44.6823	42.1755	41.2155	39.6049	42.6742	27.6121	28.5316	40.5029
BBLN_1	BBLN		protein_coding	22.5327	19.6915	38.1862	30.1813	24.6219	17.768	39.4461	34.8183	9.20712	8.91962	45.6729	48.2366	44.9589	47.4657	45.482	50.4714	37.0222	41.3559	43.8689	43.3434	40.1898	43.9586	38.2753	43.6301	41.3164
BBOX1_1	BBOX1		protein_coding	7.46669	6.16722	1.20677	1.34495	13.3703	16.7523	1.4838	0.960188	2.22014	1.56693	23.6881	26.6668	27.7708	24.5622	22.2677	21.3432	24.7274	19.7969	18.5167	19.0961	12.402	17.8316	12.7374	18.5723	16.6058
BBS10_1	BBS10		protein_coding	6.4709	4.66377	5.14905	5.24779	6.43686	7.1127	5.68829	7.83979	2.28509	2.12718	15.5191	9.27171	11.9458	12.9006	13.4042	15.4118	12.3167	13.7809	14.8112	15.5495	12.4977	15.4578	11.099	13.4884	13.0988
BBS12_1	BBS12		protein_coding	6.71783	6.67177	6.4739	7.56451	10.7049	16.7219	7.42945	6.28957	0.854258	0.76047	6.09777	4.20174	4.85192	4.54636	4.00162	4.23533	4.2898	4.37759	3.91503	4.20507	3.51692	3.69007	4.1474	4.81614	3.61298
BBS2_1	BBS2		protein_coding	16.7501	17.6835	14.1516	17.0552	13.7189	20.0062	15.2063	23.8007	5.44583	5.96954	14.9696	14.32	14.0208	16.7964	19.4352	15.7852	23.1687	21.2974	28.2375	34.422	28.2977	24.9424	34.5886	31.9206	28.4347
BBS4_1	BBS4		protein_coding	8.4326	8.61363	6.98215	6.83126	14.6206	19.6555	9.4559	11.9935	4.63935	4.15249	19.5338	19.9029	20.3104	18.6212	20.0141	21.7683	19.8641	23.7039	21.6529	19.8052	17.2095	19.1575	13.8648	17.4248	16.4163
BBS5_1	BBS5		protein_coding	18.1381	17.2467	8.75586	9.83691	18.3805	14.0432	14.1269	13.3465	4.31206	2.30292	19.6043	22.8171	22.7329	21.8354	18.687	16.654	19.8789	30.5979	23.3587	17.863	16.8851	20.6591	18.4805	21.5679	19.7404
BBS7_1	BBS7		protein_coding	19.2107	14.4594	11.606	11.1495	15.4509	22.6714	9.72415	12.5127	2.04264	2.11923	21.3609	18.8676	17.596	19.4294	16.4414	16.8909	18.988	18.698	17.5012	16.0612	16.3514	18.9509	16.4769	17.1307	16.7256
BBS9_1	BBS9		protein_coding	13.7516	13.2642	7.03023	7.42753	18.1112	23.4381	10.3097	10.5421	2.56847	2.28391	11.3919	11.2361	14.1034	13.7691	13.9049	12.2401	15.1389	12.7257	12.096	10.2926	10.6106	11.5629	8.56302	9.16312	9.37637
BBX_1	BBX		protein_coding	10.0677	8.14354	14.2775	19.3883	11.5371	14.7404	20.0407	18.1245	8.66972	9.27708	12.8633	15.3429	17.7455	19.7463	13.7843	22.692	13.7314	13.1249	21.6717	20.6364	19.8517	9.32838	13.4031	23.6017	12.7847
BCAN_1	BCAN		protein_coding	5.14862	3.17439	0.05526	0.142099	1.15827	1.88168	0.112488	0.071811	0.078517	0.095452	1.16156	0.441562	0.999693	0.350918	0.526715	0.268269	0.232913	0.431378	0.096295	0.210873	0.453163	0.266622	0.139219	0.08817	0.225932
BCAP29_1	BCAP29		protein_coding	67.8978	66.596	48.1986	45.9231	60.2584	55.9643	61.1018	49.761	30.2681	22.2812	193.331	179.104	171.419	169.459	184.974	196.899	192.63	202.396	195.224	163.388	170.447	164.736	144.758	163.012	155.618
BCAP31	BCAP31		protein_coding	89.1949	85.738	131.155	139.943	96.2573	128.576	111.852	142.288	92.9428	87.6739	175.85	146.747	164.342	162.077	166.214	189.048	145.579	153.118	156.331	150.55	127.824	155.3	130.797	139.153	140.668
BCAR1_1	BCAR1		protein_coding	58.4343	58.3234	102.371	111.52	60.6117	73.3596	96.0066	90.5701	20.9773	24.0016	40.6635	50.5658	46.4713	49.44	50.6025	54.2274	40.6421	36.2994	38.2365	46.4887	45.2336	44.9574	37.3092	41.6024	43.5772
BCAR3_1	BCAR3		protein_coding	1.20438	0.678714	11.9421	13.0889	0.666096	1.20401	7.47862	10.7649	2.21119	1.7245	4.606	6.33717	6.37341	4.48424	5.56925	5.07196	6.80039	6.55316	5.88186	5.15564	4.94081	5.58966	5.27668	5.28926	4.79925
BCAS1_1	BCAS1		protein_coding	0.19523	0.198083	3.94684	5.6815	0.663189	0.426991	4.96084	2.16678	0.911239	1.10753	14.1452	7.68083	15.0712	8.1252	9.2025	13.429	10.315	10.0363	8.51106	7.27167	6.77486	8.42927	5.29416	8.06119	6.39246
BCAS2_1	BCAS2		protein_coding	90.7571	91.1173	129.205	138.62	69.6813	71.9677	126.264	149.169	81.9686	67.8049	88.9227	100.223	83.1139	90.4499	97.163	101.387	86.7244	94.2356	87.6547	99.4951	106.73	103.978	104.266	97.1495	103.205
BCAS3_1	BCAS3		protein_coding	13.3903	13.6838	23.285	23.7627	20.2323	30.8315	19.9172	29.9648	17.296	17.5693	16.8176	16.6063	16.8056	15.7546	17.4986	18.5162	17.7317	16.1771	19.3175	19.337	18.9435	19.1706	15.0321	16.0394	19.9026
BCAT1_1	BCAT1		protein_coding	12.1788	6.93106	36.3362	32.62	7.79217	5.18795	30.0475	10.1157	11.646	13.537	45.775	53.6653	52.3665	43.7211	42.3313	43.0241	39.0162	47.3543	31.5331	43.8969	38.6644	37.6002	23.6501	34.7152	29.5269
BCCIP_1	BCCIP		protein_coding	112.292	100.773	102.316	95.2826	66.3349	70.0555	74.7267	76.094	36.7976	30.0208	108.724	128.884	98.2355	100.222	99.7311	83.9543	117.031	113.265	117.663	104.993	114.944	104.025	130.105	122.406	99.122
BCDIN3D_1	BCDIN3D		protein_coding	8.00852	7.59084	8.3518	12.5818	6.47933	9.81198	9.39945	11.8578	3.17777	2.19638	6.2264	7.62096	7.69051	7.40925	8.27503	8.22441	7.42032	7.60501	7.91404	7.87597	7.76787	8.8094	9.43143	7.52163	8.0254
BCHE_1	BCHE		protein_coding	28.5812	26.6197	65.732	56.4839	29.6806	26.0658	21.4082	21.2988	12.131	8.80457	27.2349	32.4562	51.4992	61.9878	57.1258	73.3037	106.054	96.6551	81.2998	83.7235	100.88	52.1968	93.1365	104.909	66.6798
BCKDHA_1	BCKDHA		protein_coding	50.7917	48.1506	53.0878	58.0712	63.9744	92.5098	44.9224	68.7673	25.9139	28.0206	67.4607	59.7623	60.2916	64.1849	74.6364	65.9652	53.2164	51.7584	49.8372	58.4968	43.0348	55.6984	40.5587	44.7221	59.3994
BCKDHB_1	BCKDHB		protein_coding	27.5626	28.1038	54.9337	55.2303	34.5925	29.9831	48.5394	44.006	13.4563	12.2514	132.8	138.727	142.124	120.983	144.871	117.822	117.338	126.145	101.187	95.6423	82.6357	91.3236	62.2294	83.3776	77.3073
BCKDK_1	BCKDK		protein_coding	37.3647	34.1274	48.2879	49.2828	40.5159	87.7024	41.8189	72.2728	14.7383	15.2186	36.3211	32.7191	42.0098	38.1876	38.9489	41.4983	43.2191	35.7674	43.9647	39.3042	32.7489	36.3535	28.7044	35.1567	36.7234
BCL10_1	BCL10		protein_coding	18.5607	16.4834	13.2479	15.1763	14.6128	10.2241	14.2567	10.0229	4.2705	3.08643	21.9238	25.4817	22.9332	23.9471	24.9104	20.712	27.4762	24.3601	25.3967	27.5518	27.298	24.2197	27.1546	28.1019	20.9017
BCL2_1	BCL2		protein_coding	42.1321	36.1598	37.6817	40.3909	67.9762	73.402	22.9606	23.1322	15.1046	17.0269	38.2211	32.7149	46.6134	33.8347	35.7896	35.7502	41.1957	30.6459	31.815	33.7856	29.7875	35.6081	22.6806	27.5373	28.1679
BCL2A1_1	BCL2A1		protein_coding	2.05446	3.04444	0.234187	1.77467	5.83896	4.63757	0	0.182146	0.319858	0.369019	10.6017	7.85056	5.85085	6.52365	9.86519	6.83758	7.33901	12.9545	5.65085	4.62674	10.4756	7.11191	9.34389	8.78255	5.55253
BCL2L1_1	BCL2L1		protein_coding	31.7367	27.5349	53.2683	57.861	28.094	23.7466	66.9628	86.3955	86.6194	98.5129	66.8751	67.9954	75.1875	75.936	68.1006	76.9864	59.9669	63.6703	60.0935	52.6404	59.5079	57.9937	68.8251	73.0265	70.6628
BCL2L10_1	BCL2L10		protein_coding	22.4363	21.0365	34.0431	35.7255	17.1245	18.5316	29.5666	38.5823	72.8141	76.6773	135.622	166.603	168.111	158.303	132.688	169.577	138.929	98.0148	129.166	101.142	94.051	104.112	116.556	127.506	137.691
BCL2L11_1	BCL2L11		protein_coding	5.10026	5.98403	4.62983	6.03169	7.2775	10.7601	4.31053	7.20976	6.2837	5.65564	13.5869	10.0138	13.1861	9.73352	11.2213	9.03517	14.8556	18.4052	14.4952	16.1623	17.6758	18.3006	11.5455	14.844	14.1984
BCL2L13_1	BCL2L13		protein_coding	43.9743	44.8563	67.7218	73.6394	31.3576	38.924	89.1722	95.7551	32.9641	30.2701	56.241	52.4472	67.186	47.7977	57.9944	53.7728	53.0107	49.7584	51.8283	55.3763	64.683	49.7504	54.3887	63.5531	61.4532
BCL7A_1	BCL7A		protein_coding	46.1879	47.1738	42.298	44.0929	31.0401	23.4383	58.6172	35.372	11.2671	8.0284	17.3755	21.9273	20.0064	22.0461	21.0221	17.694	25.3608	22.2274	24.7904	28.2364	25.5482	25.2705	27.8205	30.0607	22.0242
BCL7B_1	BCL7B		protein_coding	25.5772	23.8668	26.9458	27.4079	25.0236	22.4882	22.5595	27.4819	13.5973	12.7278	34.8995	36.1733	32.0577	34.6741	35.9567	40.246	32.663	30.6743	32.4418	34.3139	33.0934	33.7801	30.6001	31.8459	34.5889
BCL9_1	BCL9		protein_coding	31.82	26.8833	45.9477	49.7214	40.4951	49.184	38.9413	41.2165	10.1637	9.83093	25.6139	24.7153	26.187	22.6929	27.0916	29.2103	29.1085	26.193	30.1264	31.1077	26.6927	25.8029	30.821	30.4099	25.8528
BCO1_1	BCO1		protein_coding	0.291778	0.53541	0.28587	0.19868	0.432356	0.398336	0.239295	0.123914	0.545725	0.789465	1.76176	1.80569	2.35948	2.50105	1.96275	1.83883	1.81189	2.93904	1.97947	4.25638	4.58235	3.42573	3.46369	2.45443	3.0117
BCOR_1	BCOR		protein_coding	28.2128	31.5652	43.9524	52.6698	21.0711	31.7577	33.244	48.8962	7.08025	9.38331	15.0939	17.8783	15.85	14.5872	18.0001	18.2428	13.7472	14.9318	17.3391	15.679	15.2587	14.1973	14.5077	16.6623	12.2212
BCORL1_1	BCORL1		protein_coding	4.34931	4.89656	4.53826	5.5088	5.64764	8.82626	4.73892	5.82834	2.28911	2.12852	6.38806	6.42847	7.21247	6.23603	6.22144	8.43232	6.07466	5.95966	6.67988	6.24679	4.86159	5.9602	5.4712	6.01547	5.25626
BCR_1	BCR		protein_coding	22.5822	23.1302	27.9302	31.9258	25.5414	31.4333	30.1071	31.8882	20.9132	11.9364	22.1922	21.0724	23.1849	20.432	24.6327	23.4444	26.304	24.5471	23.466	20.6947	22.5897	20.8704	19.7305	22.9623	19.1461
BCS1L_1	BCS1L		protein_coding	11.342	11.0192	18.6883	18.96	11.1884	11.1747	14.3974	16.0709	7.28246	6.81977	14.1059	14.0524	14.2849	13.5667	13.8337	13.4472	13.3024	12.1394	11.1056	13.6687	14.4654	14.4183	14.078	13.3049	14.5542
BDH1A_1	BDH1A		protein_coding	130.428	121.767	267.304	293.304	112.044	99.7336	269.166	216.105	136.331	124.939	182.779	224.802	203.559	200.345	211.343	213.41	192.261	205.49	231.471	203.629	195.426	192.321	199.3	206.613	199.258
BDH1B_1	BDH1B		protein_coding	12.4363	12.8841	21.699	25.9256	9.6567	19.008	19.1181	24.0217	10.1284	11.6765	16.5971	16.2639	19.1446	16.2416	19.6115	15.8528	17.9967	19.1309	21.807	19.1669	19.929	17.9806	15.3046	20.2498	17.1426
BDH2_1	BDH2		protein_coding	19.4487	20.9702	33.2244	25.4766	29.0578	31.2662	25.6714	21.1931	14.7135	12.2506	33.0285	32.9985	34.5717	27.9887	32.8151	31.2804	46.3296	36.8296	45.5065	29.8844	33.1591	31.7054	36.3959	38.834	25.3008
BDKRB1_1	BDKRB1		protein_coding	0.026104	0.337859	0.044605	0	0.440323	0.818095	0	0	0.45629	0.352569	5.19366	5.68447	6.96592	6.0999	5.04104	6.74907	4.77848	5.84966	4.07044	3.39216	3.50534	3.28529	4.05684	5.65145	3.39756
BDKRB2_1	BDKRB2		protein_coding	0.542482	0.567127	0	0	3.70888	2.24426	0	0	0.86706	0.763859	8.36592	7.37774	5.63359	7.41298	6.11564	7.75726	8.81244	6.56827	3.65794	3.55027	2.41665	3.61376	4.10297	3.97218	2.76188
BDNF_1	BDNF		protein_coding	4.11632	2.16615	7.13998	6.74375	2.73264	3.98207	5.80201	9.65192	1.35345	1.98672	7.8328	10.7984	7.18069	8.48345	8.29856	9.70587	10.2378	11.2261	10.0235	5.60118	7.32794	5.48721	6.43089	8.35428	7.02161
BEAN1_1	BEAN1		protein_coding	75.0267	78.932	20.7879	27.9747	40.5719	43.3753	34.5119	18.7068	4.3803	3.51411	27.3498	24.7462	30.1444	19.3903	27.2609	21.452	21.843	20.4102	23.1257	18.0577	16.6919	18.5629	13.993	18.2782	16.2336
BECN1_1	BECN1		protein_coding	49.6318	47.98	58.3562	61.3315	40.6465	39.7066	53.0191	56.2503	25.694	22.1617	63.7739	75.1422	67.6315	63.564	69.7298	63.3126	69.4553	67.0094	75.9261	80.0047	75.252	68.7224	77.0141	79.5548	66.4093
BEND2_1	BEND2		protein_coding	7.31147	5.20845	12.2472	12.1205	4.90725	6.17605	9.96429	14.2371	3.27914	2.23157	5.81847	6.74747	5.39938	6.27392	7.36268	6.6991	6.84418	7.49384	7.9683	7.67495	6.71375	6.2404	6.93182	7.67844	7.08636
BEND3_1	BEND3		protein_coding	30.7677	29.9286	20.4467	21.4245	26.4783	26.6017	17.2215	14.395	1.86041	1.47194	9.58798	11.573	8.51663	10.5919	10.355	10.2147	8.39511	9.03023	8.1711	8.2295	9.3644	8.23456	7.74224	8.54515	6.62074
BEND4_1	BEND4		protein_coding	9.66656	8.54986	7.2385	8.50888	12.3206	19.0521	4.03737	2.40712	1.01168	1.24361	6.10969	6.21624	6.42254	5.65677	5.79762	4.53753	4.37557	5.00415	5.12744	6.58762	3.54664	4.99349	3.50157	6.88025	4.98272
BEND5_1	BEND5		protein_coding	2.33353	2.07158	10.6406	17.5023	2.11074	6.9707	0.868524	1.9172	0.174193	0.059752	0.474155	0.194609	0.518423	0.29805	0.312617	0.259221	0.234576	0.4591	0.160811	0.404656	0.226606	0.287155	0.297603	0.462491	0.321724
BEND5_2	BEND5		protein_coding	79.2916	86.0232	54.6315	61.8641	70.2605	87.1744	28.6904	32.112	6.98213	6.49358	25.4635	22.6796	25.3097	21.5677	24.0901	23.9622	23.748	22.4976	22.5973	19.8136	18.405	19.6883	15.2715	19.4973	15.9557
BEND6_1	BEND6		protein_coding	1.51793	1.04336	1.67295	1.70553	1.58435	1.82057	2.86888	2.39051	0.491851	0.830828	6.36708	6.7755	4.90356	6.92161	7.8627	7.40925	8.25805	8.2668	6.32646	7.45223	5.3782	6.12918	7.30082	6.83468	5.82333
BEND7_1	BEND7		protein_coding	23.8381	28.6232	19.4608	24.6408	16.5683	26.1323	21.0214	26.967	8.48042	7.47035	36.1755	30.397	35.1781	31.4064	40.8376	34.1701	37.4235	35.2711	36.0294	33.0164	28.723	30.9968	26.1735	27.5729	28.1248
BET1_1	BET1		protein_coding	27.4427	24.6599	19.8871	20.6586	25.5199	22.7812	25.167	15.3738	8.95406	6.3951	41.6617	48.3866	45.7359	42.6055	48.0296	40.0338	48.5764	52.6616	48.2613	44.9777	46.543	44.3075	40.0294	41.9894	37.6342
BET1L_1	BET1L		protein_coding	31.7214	30.8517	29.5799	31.0941	32.5279	31.4487	31.5759	26.1916	10.2762	10.8679	46.1917	45.0169	44.6685	42.8031	44.1359	49.5551	42.3372	41.0101	41.5476	44.2726	39.7565	44.3641	35.1452	37.5059	37.8428
BF1_1	BF1		protein_coding	6.69124	4.50182	7.39145	3.88187	7.17745	6.02509	6.60723	6.97809	5.84267	4.91495	105.974	105.539	83.1069	69.0748	72.2211	112.65	93.102	91.9458	84.9205	76.8374	139.868	98.4282	56.9093	73.6149	81.0291
BF2_1	BF2		protein_coding	14.6888	7.09978	15.0298	5.44122	7.75281	7.54044	6.45231	9.56945	13.2075	9.4044	159.934	134.894	108.052	172.383	207.665	157.802	141.376	132.766	122.353	210.798	196.901	135.106	84.6663	100.855	110.875
BFAR_1	BFAR		protein_coding	21.6297	15.7832	17.6238	15.9962	15.6738	15.8715	17.8443	16.8271	8.17167	6.16664	26.7012	32.4251	27.3756	28.5192	28.0532	28.7239	29.6496	31.1627	32.0175	30.2973	27.4545	28.2858	29.0783	33.3115	25.3937
BG2	BG2		protein_coding	0	0	0	0	0.303441	0.29854	0	0	0.028151	0.042097	0.715325	0.49982	1.36805	4.67181	4.87288	0.071676	0.27247	0.646861	1.68996	4.4367	0.826263	0.764116	0.646579	1.08218	1.85898
BG8_1	BG8		protein_coding	3.00773	9.02086	0	8.78105	10.6232	21.8491	6.35622	17.6873	1.11196	1.66569	12.2853	10.1168	25.6033	7.65847	6.6934	12.0631	8.30549	10.052	16.153	9.33602	14.1289	12.051	9.47601	7.13787	3.65582
BGLAP_1	BGLAP		protein_coding	9.88794	7.71805	9.1471	10.0017	6.52436	22.4284	3.7869	10.8989	6.13442	4.11823	10.1915	22.6221	32.8669	24.5182	32.0457	25.1424	29.6224	17.6107	28.2359	25.4202	23.3956	30.5974	20.3974	22.2651	20.4176
BGN_1	BGN		protein_coding	31.8572	122.69	0.197011	0.157277	139.506	125.29	0.06196	0.040351	4.71421	4.27727	407.88	414.846	383.002	427.377	516.001	378.019	487.872	401.6	413.059	353.491	286.432	293.24	191.339	248.78	300.853
BHLHA9_1	BHLHA9		protein_coding	0	0.015926	0.214232	0.046747	0	0.072639	0	0.180862	0.160298	0.238601	1.55196	0.878947	0.314718	0.564826	0.921486	0.216229	2.59389	3.37088	3.09926	0.01187	0.074388	0.236678	0.428412	1.00905	0.121769
BICC1_1	BICC1		protein_coding	22.7538	24.0254	8.53595	9.36329	37.0416	52.1995	7.08591	13.554	8.91015	8.90946	45.5373	44.3717	46.2665	37.9585	46.1142	44.8117	41.261	47.5009	43.133	32.3906	31.062	28.5282	26.1694	36.4564	35.3087
BICD1_1	BICD1		protein_coding	4.60146	3.99265	1.75468	3.05536	3.38008	5.48033	2.71288	5.16436	2.0442	5.73662	1.03936	1.51789	1.22357	1.63334	1.4762	1.79216	1.75058	1.14755	1.21757	2.30419	1.52989	1.05767	4.22502	2.41893	1.69444
BICD2_1	BICD2		protein_coding	113.67	124.239	122.492	128.233	155.193	159.649	182.589	164.136	76.7005	61.8375	181.277	185.693	194.012	168.441	180.774	184.255	184.129	190.156	176.083	170.836	165.853	156.638	154.383	185.641	158.003
BICDL1_1	BICDL1		protein_coding	1.72498	1.50224	3.91451	3.7943	2.12412	3.27805	1.42517	2.06939	0.297175	0.338926	0.672552	0.493596	0.229628	0.472267	0.618886	0.535884	0.48908	0.516035	0.586689	0.759944	0.274463	0.553314	0.48415	0.536986	0.45985
BICRA_1	BICRA		protein_coding	14.1349	14.1762	16.376	16.2285	16.9656	29.6367	15.2022	26.9782	5.65475	4.8772	9.94122	9.31761	10.637	7.20095	9.67788	10.5308	9.00304	8.90352	9.39631	11.1667	10.0855	10.7444	7.45732	9.81255	7.81878
BID_1	BID		protein_coding	118.259	125.492	142.434	123.987	107.77	85.3415	345.601	295.948	10.511	10.4898	53.6881	47.432	62.9216	54.1688	56.0955	48.2781	60.2512	59.4269	67.5168	68.1696	82.3211	63.1534	61.4497	71.9718	59.7653
BIK_1	BIK		protein_coding	4.82393	3.4883	14.8221	10.7198	4.99586	3.44025	6.25953	3.64457	1.46921	0.845051	2.72531	4.63315	3.19461	3.98201	3.96465	5.08387	3.92396	5.48093	4.31602	4.26318	4.02211	4.91681	5.19793	4.25308	4.45121
BIN1_1	BIN1		protein_coding	57.0229	58.6821	80.7236	79.1911	81.3096	92.1071	39.4855	43.0996	51.9127	34.5717	73.8821	74.1821	84.6842	79.0646	80.9101	74.8114	77.4819	65.214	76.153	58.2141	47.859	50.5938	44.5343	60.7216	54.7717
BIN2_1	BIN2		protein_coding	1.71816	1.33777	0	0.025764	1.42594	1.42515	0	0.058789	0.23316	0.151805	5.38733	6.06106	5.23905	5.73924	4.61067	6.20653	4.932	4.30786	4.67556	6.05522	11.6216	5.0598	3.36717	2.80969	4.53703
BIN3_1	BIN3		protein_coding	29.3354	25.5638	50.3262	54.7276	34.2062	47.3651	51.9596	92.6171	25.4245	29.4473	35.9478	40.6104	24.8759	39.418	39.4416	44.4813	23.3117	40.5109	47.8093	46.9916	42.9628	42.8808	43.8806	43.1696	34.7179
BIRC3_1	BIRC3		protein_coding	28.6838	32.2662	29.2121	34.5893	23.2219	24.8212	26.7621	26.758	34.1521	28.644	47.1585	51.7434	50.2247	49.0379	51.707	55.8136	52.7139	47.4819	47.6845	48.4197	61.1443	49.9844	60.1206	57.37	50.8598
BIRC5_1	BIRC5		protein_coding	152.916	130.839	96.4877	82.1999	94.1003	58.2402	144.491	127.379	12.2834	11.5955	105.821	103.773	100.291	113.184	108.991	69.9061	96.9311	110.742	99.643	116.401	112.269	96.1275	92.9069	89.552	88.1156
BIRC6_1	BIRC6		protein_coding	54.4402	53.4384	67.1384	70.3755	53.5918	76.5434	63.9926	82.6392	17.9824	20.3668	31.2081	30.7579	32.6874	29.2956	30.9743	28.7027	34.2626	29.3452	29.9424	33.1056	30.3385	28.2538	30.007	34.2097	29.1888
BIRC8_1	BIRC8		protein_coding	13.4505	13.124	11.9691	13.7382	15.6106	17.2294	12.7747	14.4467	16.7703	14.7627	27.0555	23.399	23.24	21.9821	21.0172	21.8832	25.5166	24.0164	23.0057	20.9459	21.9186	21.0004	21.8375	25.1177	16.6552
BIVM_1	BIVM		protein_coding	41.768	39.0203	55.4851	56.4184	39.5211	38.8318	54.2203	40.1039	21.3616	17.1597	36.4895	40.3813	36.9738	32.3838	35.827	33.6348	39.7078	39.2109	41.8747	39.4439	41.3816	39.0537	40.5255	45.092	36.306
BLB1_1	BLB1		protein_coding	2.40246	3.82642	0.925504	2.18082	5.87386	5.98972	1.79724	1.84816	2.06859	2.86714	74.9047	64.7634	24.472	40.4704	84.7789	59.8029	71.8928	43.7646	59.5659	104.502	185.363	64.7606	53.7179	79.97	85.0916
BLB2_1	BLB2		protein_coding	6.33047	2.95523	1.80229	1.97315	7.48562	8.6076	1.51646	1.70127	4.70762	5.17618	114.63	108.21	20.5139	84.1338	124.613	73.9652	89.2518	67.0491	93.8222	148.628	148.859	79.5868	62.2911	117.179	97.1336
BLCAP_1	BLCAP		protein_coding	98.9579	99.9957	118.372	116.274	95.0424	86.7977	123.236	116.248	143.188	132.956	246.661	241.552	259.179	239.584	227.344	276.97	253.182	226.084	225.903	220.625	222.81	241.012	212.014	216.615	235.937
BLEC3	BLEC3		protein_coding	0	2.05226	0.025011	1.92536	2.86416	5.66887	2.11328	3.22796	0	0.298937	0.376173	0.447279	9.46717	3.72189	6.2627	4.0256	2.90049	0.568677	0.611305	5.87771	7.54112	2.96955	2.1345	0	0
BLK_1	BLK		protein_coding	1.88342	1.02333	0.107402	0.096269	0.52249	0.220595	0	0	0.231186	0.133039	1.79561	1.83344	1.02633	1.46462	1.12866	1.00753	1.62807	0.882353	1.19324	2.07351	3.91288	1.44895	1.06131	1.4194	1.12013
BLM_1	BLM		protein_coding	23.6934	21.1196	19.606	19.2154	18.246	17.172	31.9688	35.9199	3.45651	2.13254	10.3058	12.1389	13.789	14.9718	13.036	8.92201	14.9104	14.1993	15.4245	16.998	14.5186	12.4466	12.9186	12.4878	11.5007
BLMH_1	BLMH		protein_coding	173.053	174.768	156.411	156.857	130.344	103.986	168.264	124.376	62.3888	39.8422	251.418	320.953	250.467	305.691	349.053	334.361	366.135	517.561	414.504	335.746	371.08	305.957	347.771	329.516	343.171
BLOC1S1_1	BLOC1S1		protein_coding	60.1811	40.9205	79.9488	62.9327	59.762	56.7136	82.937	77.1401	39.4667	38.4973	59.6304	84.8472	59.8275	67.3136	65.4735	61.3991	73.5961	57.0262	56.02	88.1106	59.646	84.0269	49.6372	65.2061	52.6089
BLOC1S2_1	BLOC1S2		protein_coding	65.0186	57.8198	50.9579	53.1483	43.763	38.966	56.7006	43.511	18.6507	10.3289	56.9924	56.2001	58.1742	51.1171	46.271	46.4182	61.9203	63.1537	52.8572	56.571	55.7505	60.5661	52.5342	59.2822	44.2774
BLOC1S4_1	BLOC1S4		protein_coding	68.6429	73.4395	54.1136	64.9722	62.3372	57.1008	61.9322	51.4364	26.2043	18.7013	56.3963	57.2089	51.3582	57.6299	58.0879	51.0593	59.9446	66.5669	57.6367	72.8447	60.1886	51.7106	57.7509	62.0416	42.6103
BLOC1S5_1	BLOC1S5		protein_coding	35.3839	34.6616	23.9147	21.9127	34.2144	26.6647	33.9403	24.3559	15.0216	9.99087	54.048	58.3247	57.7407	53.4137	57.4781	52.6184	67.8211	65.5148	63.4121	62.3891	65.2363	59.0811	59.2873	61.7671	54.3495
BLOC1S6_1	BLOC1S6		protein_coding	15.0916	13.6249	12.4616	13.878	18.7175	11.132	17.7543	10.7842	4.78137	3.31744	26.3857	29.9492	27.6221	27.8472	28.1211	25.8411	29.0019	30.4766	31.8735	31.3495	26.4735	26.9697	28.5704	31.7486	23.9616
BLVRA_1	BLVRA		protein_coding	4.4331	3.81086	6.35422	7.4117	1.86886	1.13728	7.69474	8.54774	0.764149	0.800723	19.5141	21.7237	20.3193	16.5383	20.1427	17.9286	18.623	22.5273	22.8538	17.0259	16.951	18.8322	13.1622	15.4538	14.0997
BMERB1_1	BMERB1		protein_coding	92.0843	105.898	34.1132	44.8468	90.1454	98.6366	34.4987	32.9608	5.47613	5.69476	20.2694	20.1006	26.6645	19.1646	21.3249	18.3396	23.7523	17.6046	20.881	20.4317	17.8445	18.8722	16.9286	26.9381	22.3926
BMF_1	BMF		protein_coding	20.9166	19.4617	57.0709	52.1777	28.5692	11.6249	21.1754	6.9867	11.1264	5.78983	9.67654	6.96573	7.92031	13.9707	8.95216	13.4582	7.55035	15.4575	25.4537	9.25804	11.6658	22.1128	7.23908	8.51992	8.19568
BMI1_1	BMI1		protein_coding	59.7458	57.4194	24.9854	24.9427	63.1094	69.9479	27.3559	26.6781	11.1615	11.2638	51.4188	54.9105	56.3418	45.6721	53.7982	47.2706	46.8551	46.0423	47.2097	49.7576	41.2954	43.1396	40.7948	43.9593	42.0676
BMP2_1	BMP2		protein_coding	48.3053	53.9324	69.2849	100.399	39.9786	42.2717	57.796	55.9849	97.1321	83.94	11.3735	12.6462	10.4661	13.523	9.79246	14.474	12.9914	15.8038	14.2366	21.7054	23.8028	22.6465	38.2568	27.6219	33.1544
BMP2K_1	BMP2K		protein_coding	38.2455	36.7354	52.8729	54.8178	20.9626	24.4275	40.6119	36.7434	13.5788	12.4376	31.9388	33.4692	31.2186	29.5428	31.7309	30.6743	36.7251	32.8923	34.5256	36.9067	46.9089	34.8651	36.2697	38.3453	34.728
BMP3_1	BMP3		protein_coding	8.48076	17.802	22.8622	40.7298	21.6335	18.1283	14.2767	5.04194	7.77106	7.50992	5.37451	3.80826	5.13795	2.58562	0.893054	1.69094	1.2503	0.909426	0.912588	1.42263	0.846375	2.3247	1.1882	2.52562	2.27991
BMP4_1	BMP4		protein_coding	16.5788	18.8276	13.0689	20.1417	62.2284	93.1233	15.5705	11.1578	14.3136	15.7105	57.1315	61.513	58.147	54.9351	55.4609	60.1495	64.1672	48.2427	54.0133	45.6027	39.8058	44.1388	38.1937	49.8794	47.0386
BMP5_1	BMP5		protein_coding	2.20452	1.9316	0.598384	0.599099	15.3501	13.1251	10.5245	10.8168	8.4264	6.93156	5.03768	4.6408	4.43639	4.41168	4.79698	4.77246	6.21051	6.89105	4.03916	7.82661	10.2012	7.11499	8.76243	9.89167	9.293
BMP6_1	BMP6		protein_coding	1.96648	1.12888	17.8754	14.6083	28.8089	42.8052	14.524	19.7916	9.73626	7.08802	15.0458	10.2064	10.2803	12.9173	10.774	13.8213	14.7009	15.9461	16.0406	17.8474	16.3222	18.5234	12.5027	17.241	18.1827
BMP7_1	BMP7		protein_coding	17.8261	40.4819	205.053	216.777	26.1758	24.5844	140.058	125.384	94.8288	93.8426	29.5744	33.3491	31.6124	35.3679	33.2216	39.5024	40.6647	37.9614	37.3988	56.9284	52.9418	50.5778	64.2648	63.8576	61.6053
BMP8A_1	BMP8A		protein_coding	0.956401	1.79616	6.64882	5.01855	15.9371	12.6934	4.34188	4.78223	170.223	166.613	5.23986	6.61002	5.74695	9.77908	7.55164	8.66255	9.61093	11.2756	12.7325	28.498	44.9672	31.5734	49.8115	40.838	53.0368
BMPER_1	BMPER		protein_coding	1.37679	3.23222	0.042365	0	101.225	163.191	0.440963	0.726235	6.90204	5.19397	50.672	49.5577	53.7922	63.3471	54.7361	51.474	77.3403	49.3815	53.5008	52.1364	36.5936	59.9264	27.6867	31.1716	49.5942
BMPR1A_1	BMPR1A		protein_coding	96.7427	90.4464	71.5679	78.3605	66.7495	87.7663	67.4079	78.5251	33.2676	32.6253	44.1325	50.5191	48.4163	46.9272	52.359	47.8647	53.4619	50.5434	48.1118	51.9767	48.313	41.0574	49.3059	55.3891	46.0945
BMPR1B_1	BMPR1B		protein_coding	1.69419	1.00265	20.507	27.2322	2.12809	4.04919	6.36306	4.91976	0.438103	0.205828	2.74967	4.34063	3.24508	2.93387	3.35461	1.87516	2.765	4.09055	3.96613	3.41167	2.91873	3.82802	3.12998	4.26191	3.08999
BMPR2_1	BMPR2		protein_coding	121.777	121.913	184.235	190.55	90.0041	107.817	151.513	164.429	96.3962	117.226	47.495	52.095	50.6122	53.3654	53.9129	52.7069	57.8237	49.3584	60.1477	58.1295	53.8686	45.9105	60.9968	66.688	60.1327
BMS1_1	BMS1		protein_coding	70.625	66.0393	79.0722	78.1501	65.7664	61.6711	92.9297	85.3826	22.9434	24.7683	28.9181	37.4593	29.7894	36.1088	34.942	34.092	40.2351	39.4849	36.5895	44.8062	45.9375	40.7569	47.5795	45.0519	37.8902
BMT2_1	BMT2		protein_coding	23.6135	23.1406	13.9497	18.3412	22.5458	19.8433	24.2006	15.8018	18.7228	8.58241	17.5503	16.6169	18.0421	20.4427	21.7034	18.4865	26.1591	28.0295	25.164	26.4482	27.3129	23.6858	26.6575	24.9598	22.0078
BNIP1_1	BNIP1		protein_coding	15.157	16.2985	14.3794	16.6888	14.493	13.9633	13.8421	12.4935	8.2952	7.41129	24.4568	26.708	24.8779	26.5715	24.4738	24.2473	25.2181	23.8538	24.8489	23.4835	22.6344	24.7531	20.6305	23.6074	21.8914
BNIP2_1	BNIP2		protein_coding	19.5237	18.8797	13.9281	15.3674	16.1853	17.1474	16.6335	16.6862	26.4232	16.9272	49.2964	59.0428	53.2923	49.9102	53.5166	50.1118	55.3144	52.991	51.943	47.6904	50.0527	46.8552	48.4279	53.1576	46.81
BNIP3_1	BNIP3		protein_coding	40.8094	39.0585	25.7045	29.4257	46.1323	40.1716	40.3024	30.4228	14.1995	15.3645	142.2	114.385	128.436	125.498	113.041	140.307	133.804	117.165	116.608	97.1713	101.103	119.03	84.7426	105.728	91.4584
BNIP3L_1	BNIP3L		protein_coding	130.88	130.859	57.2781	61.6677	138.229	108.631	70.8621	52.4441	111.254	73.5839	157.734	146.178	155.563	141.366	159.417	153.163	184.897	181.399	191.944	173.654	194.254	175.873	194.287	209.014	166.074
BOC_1	BOC		protein_coding	188.045	188.506	27.3963	26.7429	185.495	330.901	25.2309	36.0399	23.595	21.5427	81.1125	96.5532	73.3478	96.6027	78.8805	107.447	60.5189	72.2786	74.8982	61.9241	45.3141	59.3504	50.893	71.7407	49.2371
BOD1_1	BOD1		protein_coding	88.5462	93.7405	75.1135	73.4998	82.068	69.6887	90.9092	77.826	22.0528	17.1302	72.7504	80.5067	69.6251	76.8478	79.209	71.5942	77.1789	84.7928	78.5785	83.6871	87.3304	79.0024	80.1914	78.5099	75.0875
BOD1L1_1	BOD1L1		protein_coding	34.6247	35.8163	39.043	44.758	39.1249	47.8136	41.8183	48.6548	12.2924	12.8334	24.9366	26.4042	25.1772	25.6676	25.8548	26.8912	29.3862	26.2019	27.3165	29.2332	25.6765	25.3329	27.6272	29.6937	23.5361
BOK_1	BOK		protein_coding	13.4876	11.8476	39.9212	52.2014	12.0899	16.6041	42.1282	44.1036	26.8703	21.6084	37.3214	27.9226	29.3314	36.2432	27.873	39.7115	36.376	23.6979	32.6458	41.4647	38.614	33.6506	45.4168	46.8508	36.3302
BOLA3_1	BOLA3		protein_coding	44.1161	37.7133	82.9324	77.5306	30.812	35.2382	56.4387	78.4688	16.15	13.8336	78.8373	83.6663	83.4374	82.0782	82.7672	70.8545	72.56	88.6848	83.269	96.8121	82.3976	91.6152	88.577	89.5869	77.926
BOP1_1	BOP1		protein_coding	38.8817	33.9716	45.9214	45.8094	34.3774	44.944	52.1651	69.1899	13.492	15.3779	17.1388	19.6188	17.3831	17.8455	16.9723	18.8839	21.9182	17.8037	20.5192	28.8515	23.6905	25.3676	22.2565	20.2686	26.3257
BORA_1	BORA		protein_coding	20.0382	20.7956	11.6038	11.4898	13.1583	10.0174	22.8498	25.7834	1.20172	1.17823	9.13238	9.37021	11.2533	10.9629	13.1704	8.69067	9.55219	12.5185	10.9985	15.4277	14.6103	9.71734	11.6841	11.652	9.27321
BORCS5_1	BORCS5		protein_coding	14.0699	13.4806	10.3044	11.7133	11.6469	14.8832	12.9037	15.5745	9.13116	8.30106	16.6423	17.0962	14.8795	18.2754	18.0257	18.1852	19.3083	18.7309	18.9422	16.0946	19.3967	18.3107	20.0255	20.7015	17.1541
BORCS6_1	BORCS6		protein_coding	10.7207	12.81	14.5725	15.6743	17.8419	20.5408	14.4602	16.7885	11.1797	10.2829	30.4325	21.1778	28.6243	26.591	29.5186	28.8304	28.7593	31.562	29.7711	34.6376	36.0366	37.6709	23.0615	25.6779	32.977
BORCS7_1	BORCS7		protein_coding	29.375	34.0354	31.5578	33.8106	26.7362	34.0011	27.3376	32.8287	14.6037	12.1532	45.6329	45.4337	48.1153	48.3136	49.0556	48.9673	42.6079	49.6402	41.8707	50.554	47.8366	51.6049	40.8447	43.9227	44.5644
BORCS8_1	BORCS8		protein_coding	29.246	29.6794	41.6961	31.4813	39.8308	29.2965	53.6232	36.6836	21.8481	19.0083	54.088	49.2115	42.204	46.9741	53.033	59.3188	47.3478	50.7261	48.7604	47.021	48.066	46.3157	46.8412	45.6515	44.1759
BPGM_1	BPGM		protein_coding	34.651	36.206	26.5115	32.9815	51.6249	40.5266	41.4442	28.638	10.2801	11.5166	47.6672	43.1975	48.694	45.9976	42.7331	41.4092	51.6227	48.0951	51.1285	58.7507	61.426	57.076	51.6096	60.195	51.3415
BPHL_1	BPHL		protein_coding	2.83487	2.9556	1.87578	2.37882	3.1867	4.14177	3.39488	4.51988	0.597594	0.580881	5.54063	6.53137	7.24321	5.8601	6.32676	3.94254	4.85241	4.6523	5.22425	4.32014	4.23298	4.19406	3.92047	3.82899	4.11518
BPNT1_1	BPNT1		protein_coding	31.8935	29.7476	23.4523	22.5646	22.0069	18.6398	23.5865	17.4225	28.1826	23.3728	25.3454	31.7031	27.8737	29.1085	29.1982	31.2876	32.8108	24.6444	28.7045	37.2002	36.3924	32.1	33.7019	31.7981	27.356
BPTF_1	BPTF		protein_coding	54.6319	55.3469	58.5308	60.9273	56.8476	72.856	56.4628	59.3738	18.6308	18.1775	28.1675	28.4963	27.3605	28.0834	29.746	27.786	32.1905	30.9203	30.5497	35.0079	33.4332	29.6002	31.6583	33.1399	27.9283
BRAF_1	BRAF		protein_coding	21.0786	19.3675	32.6435	34.9153	25.2688	38.6468	28.571	46.0575	25.7236	24.276	14.9093	17.463	15.5501	14.8866	15.3638	15.3014	20.105	15.4393	17.2301	15.5822	14.2693	13.062	19.4092	20.4613	16.191
BRAP_1	BRAP		protein_coding	21.1548	20.4489	29.2282	33.6413	20.8219	24.6757	28.6492	29.5034	25.2197	32.0004	25.8671	27.2508	23.9689	24.7187	28.1736	35.2084	29.0871	29.974	27.1389	32.5545	35.6001	32.9928	34.5939	29.5692	32.8687
BRAT1_1	BRAT1		protein_coding	6.59427	6.5657	12.1277	11.7622	11.72	13.8641	14.3155	14.177	5.09297	4.61041	11.6269	10.9259	10.3142	12.2291	11.0564	13.4263	11.9525	10.8587	12.4917	12.5369	12.569	13.4018	11.3845	11.7153	11.7104
BRCA1_1	BRCA1		protein_coding	44.6394	42.08	35.2073	35.6925	30.5358	34.0598	56.6301	75.0999	3.6671	3.40543	19.142	21.4346	24.0769	21.749	21.7793	12.1521	24.9408	23.9368	23.028	25.4157	22.257	17.1644	22.039	21.1209	15.3333
BRCA2_1	BRCA2		protein_coding	17.8537	16.1466	11.7153	13.8573	10.8115	10.9008	22.0042	22.6536	1.83723	1.52348	10.9112	11.7379	12.0183	11.9361	12.2719	8.2089	13.1827	12.1341	11.8589	11.2681	10.3794	8.89583	10.3092	10.7044	8.70121
BRCC3_1	BRCC3		protein_coding	30.2585	30.7003	39.8604	41.8583	25.1392	29.8433	31.3017	34.2341	14.8202	12.9788	26.316	32.6701	25.9177	29.1385	29.1353	30.1938	27.2139	25.753	30.9385	29.3401	33.9146	31.8422	29.5038	31.0054	26.7136
BRD1_1	BRD1		protein_coding	35.6871	37.7209	49.3544	50.5137	43.4673	58.7463	43.8518	51.8807	22.8458	22.2285	28.1054	29.9885	29.6989	26.1604	31.5321	27.61	35.6242	32.2611	31.9584	32.1437	32.5017	29.087	27.9577	34.0314	28.0206
[truncated: 11,156 more rows]

## Sheet: norm. protein coding
gene_id	Gene name	TF family	description	is TF	biotype	E7d-16	E7d-17	E7e-18	E7e-19	E9d-21	E9d-27	E9e-23	E9e-26	E14-24	E14-25	P3-11	P3-12	P3-13	P4-11	P4-12	P4-14	P5-8	P5-9	P5-10	P6-11	P6-12	P6-13	P7-8	P7-9	P7-11	mean expression	E7d	E7e	E9d	E9e	E14	space	P3	P4	P5	P6	P7	z-score of Embryonic	E7d	E7e	E9d	E9e	E14	E cluster
[truncated: 12,873 more rows]
[truncated: 66 more columns]

[truncated: 1 more sheets: non protein coding]
