# Supplementary material for: Transition from natal downs to juvenile feathers: conserved regulatory switches in Neoaves
Source: Research Square preprint supplement (doi:10.21203/rs.3.rs-3382427/v1), 2023-10-03
Supplement: Supplementary file 6 [file c755689c2af72cf5d3f82f8c.xlsx]

## Sheet: Sheet1
Gene name	description	Embryonic TO-GCN level	Posthatch TO-GCN level	difference	abs(diff)	E7d	E7e	E9d	E9e	E14	space	P3	P4	P5	P6	P7	(z-score)	E7d	E7e	E9d	E9e	E14	space	P3	P4	P5	P6	P7		diff	# TF genes	pdf		abs(diff)	# TF genes	pdf	cdf
ZBTB20	zinc finger and BTB domain containing 20 [Source:NCBI gene;Acc:100859265]	4	30	-10	10	3.41327	2.21453	6.84222	2.30578	1.61492		10.4565	8.5938	9.16634	9.38547	9.39913	ZBTB20	0.0644872	-0.507578	1.70085	-0.464031	-0.793725		1.5655	-1.19522	-0.346683	-0.0219176	-0.00167472		-10	9	0.0140845		0	84	0.131455	1
HMBOX1	homeobox containing 1 [Source:NCBI gene;Acc:422024]	5	30	-10	10	58.7493	71.7408	70.3106	70.2453	23.459		12.5855	9.9693	11.1462	10.4497	11.4114	HMBOX1	-0.00740463	0.62654	0.556751	0.553562	-1.72945		1.47192	-1.1422	0.03374	-0.662169	0.298714		-9	1	0.00156495		1	152	0.237872	0.868545
TERF2	telomeric repeat binding factor 2 [Source:NCBI gene;Acc:395598]	5	30	-10	10	47.9385	49.624	49.8991	59.9292	26.3676		37.8837	36.2995	36.7126	37.6361	36.2241	TERF2	0.0962071	0.23284	0.255134	1.0682	-1.65239		1.21686	-0.850444	-0.311393	0.893773	-0.948793		-8	5	0.00782473		2	124	0.194053	0.630673
AHCTF1	AT-hook containing transcription factor 1 [Source:NCBI gene;Acc:421484]	6	30	-10	10	40.6524	47.9947	42.1474	54.1963	33.5411		30.7829	31.7368	31.5386	29.4989	32.2093	AHCTF1	-0.391412	0.549605	-0.199805	1.34443	-1.30281		-0.350082	0.551428	0.364151	-1.56354	0.998047		-7	8	0.0125196		3	84	0.131455	0.43662
RARB	retinoic acid receptor beta [Source:NCBI gene;Acc:396266]	7	30	-10	10	50.4474	161.953	43.0936	94.5476	22.7986		24.0027	19.8348	22.3446	22.8509	22.4285	RARB	-0.435193	1.57663	-0.567872	0.360475	-0.934039		1.12184	-1.61186	0.0343166	0.366391	0.0893065		-6	13	0.0203443		4	76	0.118936	0.305164
EMX1	empty spiracles homeobox 1 [Source:NCBI gene;Acc:768977]	8	30	-10	10	0.375454	21.4715	0	2.2444	0.595229		0	0	0	0	0	EMX1	-0.491438	1.78119	-0.531885	-0.290101	-0.467762		0	0	0	0	0		-5	32	0.0500782		5	54	0.084507	0.186228
FOXB1	#N/A	8	30	-10	10	0.324355	46.5612	0	2.16392	0		0	0	0	0	0	FOXB1	-0.461262	1.78714	-0.477035	-0.371808	-0.477035		0	0	0	0	0		-4	44	0.0688576		6	20	0.0312989	0.101721
ID1	inhibitor of DNA binding 1, HLH protein [Source:NCBI gene;Acc:395282]	9	30	-10	10	155.246	240.827	123.507	204.487	405.999		144.176	141.738	115.852	122.425	138.604	ID1	-0.642059	0.134401	-0.930018	-0.195302	1.63298		0.92015	0.727058	-1.32332	-0.802673	0.47879		-3	50	0.0782473		7	19	0.029734	0.0704225
ZFP92	zinc finger protein 92 homolog (mouse) [Source:NCBI gene;Acc:418448]	10	30	-10	10	22.2748	34.1901	26.8634	28.913	28.417		22.1924	20.1731	19.4471	23.4054	23.2471	ZFP92	-1.3681	1.41519	-0.296256	0.182512	0.0666543		0.277521	-0.844696	-1.24815	0.951654	0.863675		-2	72	0.112676		8	7	0.0109546	0.0406886
FOXP1	forkhead box P1 [Source:NCBI gene;Acc:416092]	30	3	10	10	92.4389	59.9093	59.5505	88.2355	81.397		35.8637	35.8185	34.9365	26.0671	24.0779	FOXP1	1.03168	-1.04858	-1.07152	0.762873	0.32555		0.779383	0.771577	0.61919	-0.91323	-1.25692		-1	75	0.117371		9	1	0.00156495	0.029734
TCF21	transcription factor 21 [Source:NCBI gene;Acc:421697]	30	3	10	10	0	0.184108	0.228179	0.0487141	0.0575885		2.56748	1.73903	2.49469	1.1783	0.83147	TCF21	-1.06603	0.826268	1.27924	-0.565341	-0.474128		1.04119	-0.0299503	0.947079	-0.754947	-1.20338		0	84	0.131455		10	18	0.028169	0.028169
TEAD3	TEA domain transcription factor 3 [Source:NCBI gene;Acc:395810]	30	3	10	10	68.0624	91.1906	81.3723	53.3179	114.221		81.0206	79.9137	72.0769	60.7535	62.2844	TEAD3	-0.586797	0.413291	-0.0112616	-1.22437	1.40913		1.03163	0.915232	0.0911784	-1.09951	-0.938533		1	77	0.120501
HIC2	hypermethylated in cancer 2 [Source:NCBI gene;Acc:416768]	30	7	10	10	175.898	177.876	99.0269	224.116	211.189		22.0536	20.101	18.3488	17.5179	22.3889	HIC2	-0.0354157	0.00523628	-1.61539	0.955628	0.689939		0.909705	0.00876296	-0.799764	-1.18312	1.06441		2	52	0.0813772			639
AFF4	AF4/FMR2 family member 4 [Source:NCBI gene;Acc:416337]	30	8	10	10	43.0842	21.9006	52.7511	55.0556	54.7381		67.8326	67.5227	70.9024	69.4317	70.1838	AFF4	-0.172103	-1.67756	0.514893	0.678669	0.656101		-0.915277	-1.12665	1.17834	0.175322	0.688266		3	34	0.0532081
ZBTB6	zinc finger and BTB domain containing 6 [Source:NCBI gene;Acc:417108]	30	8	10	10	19.6744	27.7515	23.5187	21.6516	28.1591		19.7231	21.181	19.0148	21.6569	21.4543	ZBTB6	-1.1995	0.964712	-0.169432	-0.669712	1.07393		-0.755309	0.491883	-1.3612	0.89894	0.725682		4	32	0.0500782
HMGA1	high mobility group AT-hook 1 [Source:NCBI gene;Acc:378795]	30	9	10	10	122.396	117.819	105.34	132.813	123.384		41.1701	44.0395	41.1897	53.4658	55.0909	HMGA1	0.204437	-0.25295	-1.50027	1.24559	0.303184		-0.858789	-0.435459	-0.855895	0.955193	1.19495		5	22	0.0344288
MTA3	metastasis associated 1 family member 3 [Source:NCBI gene;Acc:421395]	30	10	10	10	22.178	38.6979	33.0417	27.1564	44.6836		8.856	16.7689	18.6423	16.702	25.453	MTA3	-1.22664	0.619982	-0.0122745	-0.670148	1.28908		-1.42359	-0.0870689	0.229348	-0.0983796	1.37969		6	7	0.0109546
YEATS4	YEATS domain containing 4 [Source:NCBI gene;Acc:771226]	30	10	10	10	92.6995	103.576	77.1097	99.1466	94.7197		53.2283	53.7002	56.8512	86.4193	85.3113	YEATS4	-0.0746976	1.00735	-1.6256	0.566675	0.126272		-0.807113	-0.779657	-0.596347	1.12379	1.05933		7	11	0.0172144
BNC1	basonuclin 1 [Source:NCBI gene;Acc:427504]	1	10	-9	9	75.3539	15.8822	18.1157	13.7829	19.3632		10.455	10.6754	20.3876	31.8251	32.7385	BNC1	1.78294	-0.480126	-0.395135	-0.560012	-0.347664		-0.989709	-0.969434	-0.0762138	0.975674	1.05968		8	2	0.00312989
HMGA2	high mobility group AT-hook 2 [Source:NCBI gene;Acc:395851]	1	9	-8	8	641.721	76.1778	245.981	114.562	30.1416		6.55847	8.98018	16.7445	10.2191	14.0609	HMGA2	1.69239	-0.586444	0.0977712	-0.431776	-0.771945		-1.16777	-0.572921	1.33425	-0.268614	0.675056		9	0	0
HOXD11	homeobox D11 [Source:NCBI gene;Acc:395328]	1	9	-8	8	3.9062	0	0.691968	0.0361851	0		0	0.124663	0.037943	0.176948	0.146381	HOXD11	1.76148	-0.547996	-0.138882	-0.526603	-0.547996		-1.29606	0.366412	-0.790061	1.06367	0.656036		10	9	0.0140845
NKX6-1	NK6 homeobox 1 [Source:NCBI gene;Acc:395752]	1	9	-8	8	86.6053	0.795342	10.4515	0.710084	8.7418		7.83948	11.5635	9.06613	11.8673	10.6827	NKX6-1	1.77557	-0.563255	-0.300068	-0.565579	-0.346667		-1.3807	0.794023	-0.664377	0.971386	0.279666
ONECUT1	one cut homeobox 1 [Source:NCBI gene;Acc:107054176]	2	10	-8	8	5.65436	2.89028	2.26138	1.68267	0.270594		0.0452189	0.165145	0.317451	0.296353	0.323346	ONECUT1	1.56183	0.170366	-0.146228	-0.437556	-1.14841		-1.51592	-0.529405	0.723465	0.549907	0.771954			639
TSHZ2	teashirt zinc finger homeobox 2 [Source:NCBI gene;Acc:419341]	2	10	-8	8	46.5006	1.64653	30.226	8.30551	16.4937		5.26395	5.38409	5.24274	11.4567	10.0409	TSHZ2	1.43993	-1.05703	0.533946	-0.686334	-0.230512		-0.731022	-0.691349	-0.738028	1.31397	0.846431
NFE2L2	nuclear factor, erythroid 2 like 2 [Source:NCBI gene;Acc:396014]	10	2	8	8	34.4994	54.3426	41.8422	48.5791	45.5945		89.1087	80.5773	79.7154	72.7149	67.1506	NFE2L2	-1.40989	1.26165	-0.421313	0.485689	0.0838653		1.34883	0.326433	0.223144	-0.615792	-1.28262
JDP2	Jun dimerization protein 2 [Source:NCBI gene;Acc:423363]	11	3	8	8	20.7922	27.5487	34.7021	41.2677	43.0901		140.751	123.403	103.46	69.9603	79.3892	JDP2	-1.35513	-0.633507	0.130508	0.831741	1.02639		1.26477	0.677437	0.0022672	-1.13184	-0.812628
BATF3	basic leucine zipper ATF-like transcription factor 3 [Source:NCBI gene;Acc:421368]	1	8	-7	7	3.85496	0.0668989	1.45979	0.440171	0.550096		1.47315	1.38585	1.15726	3.10265	1.46569	BATF3	1.68587	-0.788839	0.121122	-0.544984	-0.47317		-0.31049	-0.421687	-0.712838	1.76501	-0.31999
HOXA11	homeobox A11 [Source:NCBI gene;Acc:395327]	2	9	-7	7	11.9749	0.107406	8.81882	1.2496	0.671756		0.37688	2.73631	1.04239	3.24082	2.80775	HOXA11	1.3585	-0.817089	0.779915	-0.607698	-0.713631		-1.32825	0.555167	-0.797006	0.957891	0.612193
PMS1	PMS1 homolog 1, mismatch repair system component [Source:NCBI gene;Acc:423980]	2	9	-7	7	28.4211	19.6245	20.6507	20.832	14.0913		24.6046	25.8231	29.3795	26.0112	27.4332	PMS1	1.50619	-0.215137	-0.0143292	0.0211452	-1.29787		-1.12024	-0.452996	1.49451	-0.349987	0.428716
TFDP2	transcription factor Dp-2 [Source:NCBI gene;Acc:424780]	2	9	-7	7	62.3723	32.7166	38.0398	42.9851	17.5295		25.8961	25.7907	28.4566	29.7616	27.9973	TFDP2	1.45026	-0.368766	-0.0422549	0.26108	-1.30032		-0.983212	-1.04475	0.511424	1.27319	0.243346
MBD3	methyl-CpG binding domain protein 3 [Source:NCBI gene;Acc:770153]	3	10	-7	7	184.423	92.9507	185.353	92.913	35.466		32.7159	32.0312	33.1846	40.1088	38.8408	MBD3	1.01499	-0.387438	1.02924	-0.388016	-1.26878		-0.701855	-0.882497	-0.578205	1.24854	0.914018
PURG	purine rich element binding protein G [Source:NCBI gene;Acc:428737]	3	10	-7	7	16.5512	7.20124	16.786	6.85977	7.4358		13.9765	13.9122	15.3616	16.4292	16.8044	PURG	1.07192	-0.722798	1.117	-0.788344	-0.677776		-0.982723	-1.0306	0.0482338	0.842902	1.12219
TBX20	T-box 20 [Source:NCBI gene;Acc:373943]	3	10	-7	7	7.26434	0	8.85921	0	3.26912		1.61334	2.45797	2.88049	2.32475	2.31162	TBX20	0.828968	-0.949604	1.21945	-0.949604	-0.149207		-1.5437	0.307592	1.23368	0.0156003	-0.0131757
THAP12	THAP domain containing 12 [Source:NCBI gene;Acc:428122]	3	10	-7	7	23.9687	15.6282	16.3076	21.7322	12.0968		11.7524	12.8814	14.8221	14.4714	14.5864	THAP12	1.24972	-0.481153	-0.340157	0.785597	-1.21401		-1.46358	-0.616352	0.839997	0.576789	0.663147
AFF1	AF4/FMR2 family member 1 [Source:NCBI gene;Acc:422590]	9	2	7	7	15.4968	24.2339	51.0474	40.8258	58.0692		82.9541	73.0407	71.2491	64.5341	55.9291	AFF1	-1.25585	-0.766831	0.733926	0.161818	1.12693		1.33226	0.347576	0.169622	-0.49737	-1.35208
JUND	JunD proto-oncogene, AP-1 transcription factor subunit [Source:NCBI gene;Acc:107055370]	9	2	7	7	82.2197	55.7799	145.895	174.203	222.578		233.809	222.602	156.444	137.013	174.651	JUND	-0.79536	-1.1854	0.143984	0.561577	1.2752		1.16728	0.899769	-0.679269	-1.14306	-0.24472
THRA	thyroid hormone receptor, alpha [Source:NCBI gene;Acc:396251]	9	2	7	7	64.0589	57.2335	64.0083	89.2776	72.4204		69.2134	64.6406	51.8216	51.7741	52.8281	THRA	-0.432537	-0.985305	-0.436634	1.60984	0.244634		1.34936	0.796353	-0.753895	-0.759642	-0.632173
YBX3	Y-box binding protein 3 [Source:NCBI gene;Acc:396371]	9	2	7	7	402.668	362.834	272.503	331.728	623.679		559.67	481.048	457.5	438.224	404.064	YBX3	0.0296419	-0.266593	-0.938348	-0.497912	1.67321		1.56704	0.22156	-0.181416	-0.511293	-1.09589
ATF3	activating transcription factor 3 [Source:NCBI gene;Acc:421369]	10	3	7	7	2.24134	3.5697	5.3511	12.8725	9.47725		57.6998	47.9789	35.4151	13.2714	35.2611	ATF3	-1.01472	-0.712567	-0.307364	1.40347	0.631181		1.18529	0.60262	-0.15046	-1.47776	-0.159691
CARHSP1	calcium regulated heat stable protein 1 [Source:NCBI gene;Acc:416640]	10	3	7	7	36.8394	76.6633	32.6173	43.8575	101.837		135.281	135.415	130.315	107.686	100.031	CARHSP1	-0.721328	0.613314	-0.862825	-0.486126	1.45696		0.811551	0.819589	0.513783	-0.842964	-1.30196
CDIP1	cell death-inducing p53 target 1 [Source:NCBI gene;Acc:416662]	10	3	7	7	16.2018	24.8307	22.6095	27.6788	34.6334		29.2096	30.1763	21.7102	23.7657	23.0055	CDIP1	-1.32917	-0.0532517	-0.381692	0.367882	1.39623		0.945208	1.19651	-1.00425	-0.469936	-0.667535
ELF1	E74 like ETS transcription factor 1 [Source:NCBI gene;Acc:418828]	10	3	7	7	15.9209	29.5584	19.2413	28.8017	33.2472		52.0761	50.6229	47.7796	41.6671	38.2882	ELF1	-1.27714	0.569251	-0.827584	0.466798	1.06868		1.01359	0.767664	0.286483	-0.747958	-1.31978
PIAS1	protein inhibitor of activated STAT 1 [Source:NCBI gene;Acc:427514]	10	3	7	7	30.3981	35.2804	47.0298	43.0859	44.3263		35.8513	33.6034	32.8696	30.6286	29.2625	PIAS1	-1.38893	-0.684474	1.01086	0.441787	0.620767		1.32283	0.450348	0.165545	-0.70426	-1.23447
KLF10	Kruppel-like factor 10 [Source:NCBI gene;Acc:420255]	11	4	7	7	15.9454	19.9143	16.1811	26.8013	27.9874		62.5517	62.6302	64.8946	53.9654	55.8441	KLF10	-0.944453	-0.252921	-0.90338	0.94704	1.15372		0.539556	0.556006	1.03056	-1.25992	-0.8662
TEF	TEF, PAR bZIP transcription factor [Source:NCBI gene;Acc:396342]	11	4	7	7	50.2008	94.57	83.3115	91.557	113.075		281.073	256.589	251.427	164.742	187.232	TEF	-1.57685	0.348293	-0.140205	0.217562	1.1512		1.06543	0.571938	0.467903	-1.27929	-0.825982
NFYA	nuclear transcription factor Y subunit alpha [Source:NCBI gene;Acc:419917]	2	8	-6	6	73.3941	45.4088	53.223	53.0391	28.1794		47.1807	48.2767	50.7081	46.3811	49.1374	NFYA	1.3959	-0.321588	0.157979	0.146689	-1.37898		-0.683954	-0.0355334	1.40286	-1.15699	0.473619
AEBP2	AE binding protein 2 [Source:NCBI gene;Acc:418184]	3	9	-6	6	21.0473	13.9296	20.215	14.0504	16.8979		20.9844	22.4869	23.4686	21.8605	23.5403	AEBP2	1.14384	-0.987853	0.89458	-0.951699	-0.0988674		-1.36569	0.0172944	0.920846	-0.559279	0.986831
CAPN15	calpain 15 [Source:NCBI gene;Acc:416389]	3	9	-6	6	30.7401	28.8813	27.6756	28.446	24.2878		18.0595	20.4733	18.2184	23.4471	23.0834	CAPN15	1.15608	0.370074	-0.139783	0.186003	-1.57238		-1.01083	-0.0712598	-0.948966	1.08631	0.944743
HMGB2	high mobility group box 2 [Source:NCBI gene;Acc:396482]	3	9	-6	6	638.641	400.495	374.402	555.036	137.256		174.052	162.263	197.116	225.675	199.846	HMGB2	1.12894	-0.107305	-0.242757	0.694934	-1.47381		-0.719967	-1.19851	0.216169	1.37535	0.326955
ZIC1	Zic family member 1 [Source:NCBI gene;Acc:374103]	3	9	-6	6	159.361	0.221783	215.545	0	14.6331		11.0256	13.3864	12.7758	14.3394	11.4753	ZIC1	0.797449	-0.761414	1.3478	-0.763586	-0.620246		-1.15643	0.577107	0.128728	1.27685	-0.826251
ZNF148	zinc finger protein 148 [Source:NCBI gene;Acc:424259]	3	9	-6	6	32.6787	14.9895	29.6784	11.3078	12.4201		9.51029	9.26732	9.92881	10.4886	10.0701	ZNF148	1.22764	-0.514687	0.932123	-0.877313	-0.767765		-0.715679	-1.22303	0.158252	1.32723	0.453227
E2F7	E2F transcription factor 7 [Source:NCBI gene;Acc:417868]	4	10	-6	6	22.4746	12.6051	16.6763	22.8867	11.821		8.15576	7.33815	9.03201	10.6444	10.3422	E2F7	0.986184	-0.892124	-0.117317	1.06461	-1.04135		-0.672459	-1.2532	-0.0500674	1.09518	0.880551
HIF1A	hypoxia inducible factor 1 subunit alpha [Source:NCBI gene;Acc:374177]	4	10	-6	6	112.366	97.3641	102.027	78.7021	93.6138		106.717	107.19	115.914	133.937	137.645	HIF1A	1.26178	0.0445751	0.422917	-1.46957	-0.259701		-0.923716	-0.891544	-0.297366	0.93007	1.18256
MYNN	#N/A	4	10	-6	6	20.0041	17.9359	18.9164	18.4388	11.6069		20.2344	20.5854	20.5796	20.2343	21.5291	MYNN	0.791038	0.167459	0.463089	0.319089	-1.74067		-0.750474	-0.0888635	-0.0998838	-0.750603	1.68983
PHB	prohibitin [Source:NCBI gene;Acc:419980]	4	10	-6	6	203.903	191.084	129.67	179.419	144.72		151.552	162.338	163.102	196.975	191.677	PHB	1.08682	0.678779	-1.27605	0.307478	-0.797021		-1.08045	-0.540345	-0.502104	1.19408	0.928818
SP4	Sp4 transcription factor [Source:NCBI gene;Acc:420607]	4	10	-6	6	18.7858	17.511	18.4197	19.1548	16.0859		8.50998	8.19177	8.99067	9.72618	9.63484	SP4	0.646999	-0.391336	0.34881	0.94754	-1.55201		-0.741642	-1.21297	-0.0296456	1.05978	0.924479
TSC22D1	TSC22 domain family member 1 [Source:NCBI gene;Acc:396005]	4	10	-6	6	213.962	191.159	276.637	101.893	119.411		217.347	224.202	240.541	251.396	258.156	TSC22D1	0.467137	0.147736	1.34506	-1.10266	-0.857271		-1.20706	-0.812705	0.127308	0.751779	1.14068
ZIC3	Zic family member 3 [Source:NCBI gene;Acc:422251]	4	10	-6	6	18.6445	0.115146	50.0957	0.0640081	5.99844		2.95328	3.94677	4.84459	4.42232	4.54057	ZIC3	0.174002	-0.706687	1.66886	-0.709117	-0.427057		-1.60871	-0.263651	0.95189	0.380183	0.540286
SALL4	spalt like transcription factor 4 [Source:NCBI gene;Acc:769286]	7	1	6	6	0.794259	5.44811	0.914292	4.60489	0.719666		0.706878	0.462318	0.451892	0.442538	0.345403	SALL4	-0.730468	1.2669	-0.678951	0.905002	-0.762482		1.67666	-0.145171	-0.222843	-0.292521	-1.01612
GCM1	glial cells missing homolog 1 [Source:NCBI gene;Acc:404300]	9	3	6	6	0.209714	2.01309	0.164722	1.11455	12.4594		1.05539	1.07823	0.552259	0.392373	0.625131	GCM1	-0.569666	-0.225226	-0.578259	-0.396844	1.77		1.01686	1.09064	-0.608785	-1.12539	-0.373334
MAFK	MAF bZIP transcription factor K [Source:NCBI gene;Acc:395518]	9	3	6	6	16.0635	13.7817	17.1226	21.9339	40.021		33.4184	33.2814	29.559	28.254	28.1078	MAFK	-0.538722	-0.753598	-0.438998	0.0140665	1.71725		1.09583	1.04397	-0.365416	-0.859504	-0.914881
NR4A1	nuclear receptor subfamily 4 group A member 1 [Source:NCBI gene;Acc:100857380]	9	3	6	6	0.196768	0.0575008	2.7828	6.45126	3.15529		14.6745	11.7162	8.58235	3.30377	7.2809	NR4A1	-0.891184	-0.944406	0.0970987	1.49904	0.23945		1.28392	0.601149	-0.122137	-1.34042	-0.422509
STAT6	#N/A	10	4	6	6	27.6248	28.1787	27.1267	42.5513	50.1066		75.1967	79.8278	75.5143	70.2024	63.5293	STAT6	-0.707944	-0.655613	-0.755008	0.702359	1.41621		0.376101	1.11963	0.427097	-0.425729	-1.4971
ZBTB21	zinc finger and BTB domain containing 21 [Source:NCBI gene;Acc:427986]	10	4	6	6	9.17612	8.38052	8.32479	10.6404	10.1708		21.3188	16.9266	20.3261	14.8913	16.768	ZBTB21	-0.15556	-0.917669	-0.971053	1.24708	0.797198		1.22075	-0.41761	0.850427	-1.1768	-0.476765
ZBTB7A	zinc finger and BTB domain containing 7A [Source:NCBI gene;Acc:395411]	10	4	6	6	24.8344	47.7039	31.9851	63.572	71.755		56.8553	60.3939	50.1021	54.7391	54.448	ZBTB7A	-1.15679	-0.013308	-0.799252	0.780096	1.18925		0.412052	1.35422	-1.386	-0.151389	-0.228885
SP5	Sp5 transcription factor [Source:NCBI gene;Acc:693261]	1	6	-5	5	172.253	13.0314	10.6972	4.70927	2.09378		2.75814	3.12056	4.09438	3.3091	2.77346	SP5	1.78565	-0.373217	-0.404865	-0.486055	-0.521518		-0.828874	-0.165723	1.61617	0.179266	-0.800843
HOXD10	homeobox D10 [Source:NCBI gene;Acc:771246]	2	7	-5	5	33.0687	1.18777	20.3461	1.08422	3.33318		3.38025	6.55348	5.85715	5.89779	3.94935	HOXD10	1.48111	-0.739431	0.594965	-0.746643	-0.59		-1.26766	1.03443	0.529265	0.55875	-0.85479
TCF12	transcription factor 12 [Source:NCBI gene;Acc:396334]	2	7	-5	5	1164.39	316.458	1012.65	287.085	197.228		320.342	324.386	371.256	338.418	326.991	TCF12	1.2493	-0.612989	0.91604	-0.6775	-0.874849		-0.770836	-0.575236	1.69185	0.103477	-0.449259
HOXA10	homeobox A10 [Source:NCBI gene;Acc:776143]	3	8	-5	5	39.9019	8.07128	39.6932	13.1438	3.54241		11.5167	18.9096	12.6759	17.5455	15.4416	HOXA10	1.08079	-0.726869	1.06894	-0.438798	-0.984063		-1.18143	1.17842	-0.811418	0.742995	0.0714282
IKZF1	IKAROS family zinc finger 1 [Source:NCBI gene;Acc:395974]	3	8	-5	5	0.985949	0	0.890842	0	0.188062		2.1181	2.15432	1.54824	3.15725	1.98294	IKZF1	1.17676	-0.84814	0.981429	-0.84814	-0.461906		-0.125346	-0.0640518	-1.08971	1.6332	-0.354084
HMG20A	high mobility group 20A [Source:NCBI gene;Acc:415346]	4	9	-5	5	81.5119	68.3671	80.4708	77.1548	33.6531		36.5679	34.9553	43.0652	44.6428	43.1955	HMG20A	0.66371	0.00677445	0.611682	0.445958	-1.72812		-0.891639	-1.25867	0.587187	0.94626	0.616866
HOXA9	homeobox A9 [Source:NCBI gene;Acc:396096]	4	9	-5	5	64.5513	63.5356	64.4381	52.8388	15.5449		38.115	41.1238	39.7832	49.611	42.0927	HOXA9	0.587228	0.53901	0.581853	0.0311927	-1.73928		-0.909123	-0.230391	-0.532808	1.68416	-0.0118369
ALX4	ALX homeobox 4 [Source:NCBI gene;Acc:373976]	5	10	-5	5	8.42717	0	60.9292	0.0829882	6.46051		1.9268	3.65933	5.07939	6.85922	6.28895	ALX4	-0.261226	-0.587224	1.76977	-0.584014	-0.337305		-1.41422	-0.550245	0.157907	1.04547	0.761089
BHLHE41	basic helix-loop-helix family member e41 [Source:NCBI gene;Acc:101750689]	5	10	-5	5	14.3527	4.78717	27.829	6.89421	14.0664		10.9781	13.7995	17.5585	25.7187	23.3255	BHLHE41	0.0849532	-0.974809	1.57799	-0.74137	0.0532311		-1.17349	-0.719823	-0.115374	1.19675	0.811935
CDC5L	cell division cycle 5 like [Source:NCBI gene;Acc:422052]	5	10	-5	5	161.415	146.518	179.353	150.277	100.99		83.1137	85.132	84.4869	90.1799	87.5849	CDC5L	0.471438	-0.0410158	1.08856	0.088284	-1.60727		-1.06724	-0.345823	-0.576406	1.4585	0.530967
CPEB1	cytoplasmic polyadenylation element binding protein 1 [Source:NCBI gene;Acc:415326]	5	10	-5	5	5.92466	4.77404	7.23661	5.40261	6.44224		2.20943	1.71437	3.06506	5.49196	5.53426	CPEB1	-0.0331572	-1.24929	1.35349	-0.584936	0.513888		-0.770176	-1.04378	-0.297304	1.04394	1.06732
DNAJC2	DnaJ heat shock protein family (Hsp40) member C2 [Source:NCBI gene;Acc:417717]	5	10	-5	5	123.061	136.631	97.4643	126.739	82.6339		54.9706	52.5636	57.0137	58.4832	62.3431	DNAJC2	0.435044	1.04017	-0.706445	0.59903	-1.3678		-0.569951	-1.22193	-0.0165689	0.38147	1.42698
E2F3	E2F transcription factor 3 [Source:NCBI gene;Acc:420824]	5	10	-5	5	18.5811	20.6569	13.0368	20.0484	4.36097		6.92613	7.8111	7.5499	9.44492	9.42303	E2F3	0.474761	0.778524	-0.336588	0.689485	-1.60618		-1.14036	-0.366972	-0.595239	1.06085	1.04172
GLI2	GLI family zinc finger 2 [Source:NCBI gene;Acc:395956]	5	10	-5	5	90.2583	48.5821	186.09	112.006	31.2784		14.8179	18.894	24.8995	19.9498	20.149	GLI2	-0.0556165	-0.740422	1.51906	0.301732	-1.02475		-1.36868	-0.235709	1.43354	0.0577501	0.113104
HES5	hes family bHLH transcription factor 5 [Source:NCBI gene;Acc:419392]	5	10	-5	5	3.39183	0	15.6355	0	2.36325		0	0	0	0.309686	0.385695	HES5	-0.135932	-0.656143	1.7419	-0.656143	-0.293686		-0.723132	-0.723132	-0.723132	0.887093	1.2823
MTA1	metastasis associated 1 [Source:NCBI gene;Acc:429060]	5	10	-5	5	114.145	131.712	123.588	124.128	69.5458		45.2029	46.949	46.35	53.1891	50.6119	MTA1	0.0611625	0.767368	0.440791	0.4625	-1.73182		-0.978468	-0.454016	-0.633925	1.42024	0.646174
MYEF2	myelin expression factor 2 [Source:NCBI gene;Acc:415432]	5	10	-5	5	91.7714	94.8664	110.587	112.944	43.0042		28.9739	30.0169	34.8783	41.0817	42.5418	MYEF2	0.0402918	0.149999	0.707238	0.790774	-1.6883		-1.05228	-0.884062	-0.100026	0.900442	1.13593
PATZ1	POZ/BTB and AT hook containing zinc finger 1 [Source:NCBI gene;Acc:416963]	5	10	-5	5	24.7621	25.9559	33.5233	24.9962	5.84344		4.22146	3.62345	5.10426	6.88722	6.44857	PATZ1	0.170199	0.286578	1.02428	0.193016	-1.67407		-0.739589	-1.1667	-0.109083	1.16433	0.85104
PAXBP1	PAX3 and PAX7 binding protein 1 [Source:NCBI gene;Acc:418499]	5	10	-5	5	40.61	36.3123	42.8225	47.6629	26.396		45.8986	48.8062	49.9805	48.703	52.7524	PAXBP1	0.230238	-0.304833	0.505703	1.10834	-1.53945		-1.34461	-0.170415	0.303843	-0.212083	1.42326
PBRM1	polybromo 1 [Source:NCBI gene;Acc:396074]	5	10	-5	5	85.9641	96.9544	90.7229	104.32	41.7664		34.4223	33.6751	35.2279	38.5598	36.8891	PBRM1	0.0821744	0.529599	0.275907	0.829474	-1.71715		-0.676222	-1.05539	-0.267378	1.42341	0.57558
PHTF1	putative homeodomain transcription factor 1 [Source:NCBI gene;Acc:419878]	5	10	-5	5	23.5433	26.5621	21.4319	18.8328	6.83974		11.7758	11.8231	12.344	13.7696	13.5801	PHTF1	0.540085	0.937623	0.26205	-0.0802185	-1.65954		-0.922814	-0.873392	-0.328811	1.1616	0.963418
PLAGL2	PLAG1 like zinc finger 2 [Source:NCBI gene;Acc:100859766]	5	10	-5	5	29.2887	34.7511	27.9644	34.6199	11.9961		8.51705	9.30298	9.02916	9.46796	10.3169	PLAGL2	0.168036	0.754672	0.025814	0.740589	-1.68911		-1.22596	-0.0360819	-0.450641	0.213684	1.499
RCOR1	REST corepressor 1 [Source:NCBI gene;Acc:428911]	5	10	-5	5	83.0553	80.9429	112.667	87.3249	65.4331		46.88	48.0849	58.0778	60.5539	61.2987	RCOR1	-0.165424	-0.288938	1.56593	0.0842134	-1.19579		-1.16372	-0.990603	0.445245	0.801034	0.908049
SFPQ	splicing factor proline and glutamine rich [Source:NCBI gene;Acc:395803]	5	10	-5	5	222.975	243.043	247.48	273.784	97.0425		137.421	147.647	149.992	149.821	159.777	SFPQ	0.0880582	0.377291	0.441236	0.820336	-1.72692		-1.44536	-0.161315	0.133148	0.111641	1.36188
SOX13	SRY-box 13 [Source:NCBI gene;Acc:419820]	5	10	-5	5	7.97577	3.0487	39.4889	2.06191	6.15833		6.75841	8.79228	9.68102	12.8213	10.4812	SOX13	-0.240362	-0.554416	1.7683	-0.617315	-0.356207		-1.32423	-0.410753	-0.0115906	1.39879	0.347777
SOX4	SRY-box 4 [Source:NCBI gene;Acc:395143]	5	10	-5	5	270.177	223.454	501.635	203.836	106.725		39.7543	46.7172	52.8904	73.329	70.597	SOX4	0.0612944	-0.256494	1.63555	-0.389926	-1.05042		-1.14551	-0.673647	-0.255294	1.1298	0.944657
SSRP1	structure specific recognition protein 1 [Source:NCBI gene;Acc:396509]	5	10	-5	5	208.128	217.302	171.576	226.195	102.71		88.2837	87.7991	94.8193	109.051	103.53	SSRP1	0.453795	0.635224	-0.269088	0.811101	-1.63103		-0.895811	-0.947407	-0.199902	1.31551	0.727608
UBP1	upstream binding protein 1 (LBP-1a) [Source:NCBI gene;Acc:428458]	5	10	-5	5	90.6281	93.2834	102.348	120.829	49.9844		83.807	85.6238	99.2552	103.834	101.314	UBP1	-0.0302414	0.0718632	0.4204	1.13106	-1.59308		-1.17343	-0.978918	0.480552	0.970778	0.701023
ZBTB26	zinc finger and BTB domain containing 26 [Source:NCBI gene;Acc:417107]	5	10	-5	5	20.7651	25.6932	16.4329	21.5451	12.7798		12.7169	13.2446	13.1835	14.1126	14.6425	ZBTB26	0.266115	1.25826	-0.606045	0.42316	-1.34149		-1.108	-0.430649	-0.509014	0.683743	1.36392
ZNF326	zinc finger protein 326 [Source:NCBI gene;Acc:424512]	5	10	-5	5	126.811	134.739	110.4	127.015	50.5098		71.8664	72.6043	76.5979	76.5604	82.8135	ZNF326	0.492273	0.722989	0.0146921	0.498205	-1.72816		-0.970702	-0.801051	0.117122	0.108484	1.54615
ZNF644	zinc finger protein 644 [Source:NCBI gene;Acc:424510]	5	10	-5	5	45.0981	47.9994	51.4623	42.2094	31.9093		33.8403	34.7269	35.9155	34.8016	36.5202	ZNF644	0.182907	0.572415	1.03732	-0.204911	-1.58773		-1.24804	-0.410174	0.713133	-0.339549	1.28464
TFAP4	transcription factor AP-4 [Source:NCBI gene;Acc:430233]	6	11	-5	5	27.474	34.9102	38.0765	51.047	11.4686		13.8162	15.5657	16.3911	17.7054	18.244	TFAP4	-0.351641	0.158951	0.376358	1.26695	-1.45061		-1.43243	-0.441235	0.0263969	0.771037	1.07623
CNBP	CCHC-type zinc finger nucleic acid binding protein [Source:NCBI gene;Acc:395731]	6	1	5	5	569.91	611.886	427.935	669.687	412.604		736.776	667.579	651.799	668.763	669.248	CNBP	0.277242	0.646613	-0.972097	1.15525	-1.10701		1.74543	-0.339001	-0.814351	-0.303342	-0.288736
IRX2	iroquois homeobox 2 [Source:NCBI gene;Acc:373975]	7	2	5	5	95.3584	329.219	139.729	228.575	57.1042		98.1819	88.1161	88.085	83.1801	81.19	IRX2	-0.68125	1.45327	-0.276263	0.534653	-1.03041		1.58621	0.0555778	0.0508424	-0.695008	-0.997618
GATA2	GATA binding protein 2 [Source:NCBI gene;Acc:416018]	8	3	5	5	1.84195	1.33504	4.58678	3.18078	19.3407		16.9988	16.7185	13.1884	14.1266	11.7417	GATA2	-0.559588	-0.626885	-0.19519	-0.381848	1.76351		1.07646	0.953008	-0.601821	-0.188591	-1.23905
HIC1	HIC ZBTB transcriptional repressor 1 [Source:NCBI gene;Acc:396164]	8	3	5	5	135.976	629.676	201.424	41.4934	14.4307		97.494	119.873	67.4389	51.9815	60.3399	HIC1	-0.275502	1.70654	-0.0127507	-0.654818	-0.763466		0.636473	1.4248	-0.422237	-0.966733	-0.672303
KLF15	Kruppel like factor 15 [Source:NCBI gene;Acc:427588]	8	3	5	5	16.8331	11.9769	12.161	2.81906	27.8058		42.8405	39.7033	26.1188	17.4979	16.419	KLF15	0.276518	-0.257642	-0.237389	-1.26496	1.48347		1.16589	0.910543	-0.195101	-0.896761	-0.984568
LHX9	LIM homeobox 9 [Source:NCBI gene;Acc:396397]	8	3	5	5	0	0	0.0345035	0	0.704067		3.41169	2.93924	2.1569	2.43008	1.43413	LHX9	-0.474402	-0.474402	-0.363589	-0.474402	1.78679		1.24159	0.615747	-0.420596	-0.0587197	-1.37802
MSC	musculin [Source:NCBI gene;Acc:420179]	8	3	5	5	0	0	0.0572698	0.0271981	0.108531		6.95579	4.70734	5.50323	2.7907	1.10107	MSC	-0.844894	-0.844894	0.40866	-0.249566	1.53069		1.19371	0.215633	0.561846	-0.618102	-1.35309
NR2F6	nuclear receptor subfamily 2 group F member 6 [Source:NCBI gene;Acc:100859014]	8	3	5	5	52.3708	80.5362	55.6886	107.131	69.2013		74.4765	74.0347	63.8358	66.3521	62.1127	NR2F6	-0.930951	0.340988	-0.781123	1.54198	-0.170893		1.09523	1.0186	-0.750475	-0.314005	-1.04935
NR4A2	nuclear receptor subfamily 4 group A member 2 [Source:NCBI gene;Acc:424320]	8	3	5	5	2.13653	1.04755	5.32649	10.9275	1.37523		9.03338	7.22856	6.5788	3.88171	4.81587	NR4A2	-0.488911	-0.751684	0.280831	1.63238	-0.672615		1.34361	0.453943	0.133654	-1.19584	-0.735359
ZNF706	zinc finger protein 706 [Source:NCBI gene;Acc:768824]	8	3	5	5	137.349	119.912	125.745	165.922	127.074		369.665	364.752	348.23	311.716	293.649	ZNF706	0.117492	-0.836047	-0.51705	1.68	-0.444393		0.958042	0.811253	0.31755	-0.773493	-1.31335
CEBPA	#N/A	9	4	5	5	10.0559	10.0657	38.0444	93.0261	238.248		215.941	253.962	184.049	183.546	158.828	CEBPA	-0.707843	-0.707741	-0.415776	0.157969	1.67339		0.454554	1.49092	-0.414762	-0.428472	-1.10224
CEBPB	CCAAT/enhancer binding protein beta [Source:NCBI gene;Acc:396185]	9	4	5	5	0.502211	1.80124	4.34461	38.8071	256.735		249.751	251.617	237.586	202.13	229.294	CEBPB	-0.540547	-0.528831	-0.505893	-0.195085	1.77036		0.781547	0.874568	0.175032	-1.59275	-0.2384
CEBPD	CCAAT/enhancer binding protein delta [Source:NCBI gene;Acc:107052707]	9	4	5	5	12.5426	30.3433	25.8265	42.6517	272.418		237.679	229.719	246.231	181.749	171.368	CEBPD	-0.584257	-0.422295	-0.463392	-0.310306	1.78025		0.709613	0.477454	0.95904	-0.921655	-1.22445
EGR3	early growth response 3 [Source:NCBI gene;Acc:102725543]	9	4	5	5	5.49895	5.89548	11.6529	48.0484	86.9326		47.8835	53.5958	41.1769	45.4369	44.9744	EGR3	-0.733141	-0.722005	-0.560323	0.461753	1.55372		0.277144	1.52373	-1.18641	-0.256763	-0.3577
LHX8	LIM homeobox 8 [Source:NCBI gene;Acc:424721]	9	4	5	5	0	0.122831	0.856417	2.71304	0.81297		6.40242	5.25631	7.05224	4.68022	4.77218	LHX8	-0.830315	-0.717126	-0.041131	1.66974	-0.081167		0.73418	-0.358975	1.35397	-0.908443	-0.820735
MTF1	metal regulatory transcription factor 1 [Source:NCBI gene;Acc:428218]	9	4	5	5	18.5453	19.0507	18.6044	19.7194	30.2018		20.0683	20.445	19.8021	16.8864	19.1956	MTF1	-0.5315	-0.431235	-0.519778	-0.298564	1.78108		0.558212	0.824799	0.36982	-1.69346	-0.0593683
NCOR2	nuclear receptor corepressor 2 [Source:NCBI gene;Acc:416815]	9	4	5	5	64.8011	104.811	104.331	98.5185	95.2208		49.7259	59.6069	46.821	42.8201	47.2866	NCOR2	-1.73517	0.680816	0.651799	0.30084	0.101711		0.0752467	1.6445	-0.386092	-1.0215	-0.312154
REL	REL proto-oncogene, NF-kB subunit [Source:NCBI gene;Acc:396500]	9	4	5	5	18.3	18.9356	21.822	24.0581	20.7057		23.2424	25.0958	22.72	22.3716	21.3414	REL	-1.0657	-0.790832	0.457422	1.42443	-0.0253257		0.208165	1.54706	-0.169199	-0.42091	-1.16511
SP1	Sp1 transcription factor [Source:NCBI gene;Acc:395303]	9	4	5	5	81.8357	116.987	104.761	148.885	124.702		111.605	124.179	101.341	107.667	101.995	SP1	-1.35758	0.0627479	-0.431258	1.3516	0.374483		0.241656	1.59349	-0.861878	-0.181735	-0.791534
SP2	Sp2 transcription factor [Source:NCBI gene;Acc:425673]	9	4	5	5	15.569	17.796	20.7891	20.3027	25.6715		15.1724	15.7195	13.4665	14.5331	13.206	SP2	-1.1768	-0.588751	0.201588	0.0731577	1.49081		0.698267	1.20566	-0.8838	0.105307	-1.12544
CAMTA1	#N/A	10	5	5	5	20.2617	32.7532	18.1011	26.3017	27.7278		15.4703	15.4204	16.6603	14.639	14.8117	CAMTA1	-0.807889	1.30894	-1.17403	0.21566	0.457318		0.0882151	0.0252081	1.58774	-0.959397	-0.741768
CEBPG	CCAAT/enhancer binding protein gamma [Source:NCBI gene;Acc:395800]	10	5	5	5	45.1858	65.7669	52.7717	79.8206	75.2819		88.8249	86.7212	87.966	90.2596	82.2691	CEBPG	-1.26677	0.136463	-0.749562	1.09466	0.785208		0.530642	-0.159826	0.24874	1.00153	-1.62109
ETS1	v-ets avian erythroblastosis virus E26 oncogene homolog 1 [Source:NCBI gene;Acc:396235]	1	5	-4	4	328.038	23.9181	116.449	20.4307	25.2219		40.4994	50.8427	44.0051	39.3116	33.9473	ETS1	1.70323	-0.596618	0.103131	-0.622991	-0.586758		-0.195555	1.4599	0.365535	-0.385657	-1.24422
HOXB5	homeobox B5 [Source:NCBI gene;Acc:425096]	2	6	-4	4	89.6001	4.45119	62.1596	5.85626	7.46637		28.3845	25.9251	30.4753	29.6173	25.8382	HOXB5	1.40855	-0.744962	0.714547	-0.709426	-0.668705		0.159235	-1.00475	1.14874	0.742683	-1.04591
IKZF5	IKAROS family zinc finger 5 [Source:NCBI gene;Acc:430882]	2	6	-4	4	24.542	20.4741	18.998	18.3262	16.0391		24.1648	26.446	28.969	25.1759	23.7823	IKZF5	1.5422	0.25299	-0.214829	-0.427762	-1.1526		-0.736495	0.352498	1.55695	-0.253834	-0.919123
ZIC4	Zic family member 4 [Source:NCBI gene;Acc:424885]	3	7	-4	4	8.79417	0	9.77597	0.00851523	0.544721		1.5097	1.52004	1.37902	1.82924	1.35607	ZIC4	0.993585	-0.764694	1.18988	-0.762991	-0.655784		-0.0482827	0.00648742	-0.740704	1.64481	-0.862311
ARID4A	AT-rich interaction domain 4A [Source:NCBI gene;Acc:423541]	4	8	-4	4	42.24	36.725	51.5521	38.3732	34.1217		23.1497	23.0541	25.6494	25.0625	23.9594	ARID4A	0.241072	-0.570784	1.6119	-0.328163	-0.954028		-0.889407	-0.972365	1.27896	0.769889	-0.187076
HMGB1	high mobility group box 1 [Source:NCBI gene;Acc:395724]	4	8	-4	4	1189.87	936.129	1101.24	1368.2	311.024		463.915	438.315	493.121	530.785	469.112	HMGB1	0.513909	-0.111276	0.29554	0.953306	-1.65148		-0.434126	-1.16841	0.403619	1.48397	-0.285052
HMGB3	high mobility group box 3 [Source:NCBI gene;Acc:396232]	4	8	-4	4	661.462	565.32	494.476	564.595	202.927		271.882	232.671	284.284	294.352	283.154	HMGB3	0.934448	0.385658	-0.0187233	0.381521	-1.6829		-0.0576537	-1.68803	0.458012	0.876643	0.41103
HOXB3	homeobox B3 [Source:NCBI gene;Acc:395502]	4	8	-4	4	57.2242	10.4656	90.2755	7.4954	6.40379		14.9041	12.6073	15.1178	16.747	14.1344	HOXB3	0.604101	-0.632018	1.47785	-0.710538	-0.739396		0.133868	-1.38843	0.275505	1.35531	-0.376262
HOXC11	#N/A	4	8	-4	4	21.9169	0.0623951	57.1357	0	1.31675		1.95176	1.99639	2.06766	2.58931	1.9767	HOXC11	0.235459	-0.647106	1.65772	-0.649626	-0.596451		-0.614462	-0.447841	-0.181821	1.7655	-0.521374
NRF1	nuclear respiratory factor 1 [Source:NCBI gene;Acc:416677]	4	8	-4	4	39.1976	30.3404	38.6954	42.0267	17.1433		11.3044	12.1811	11.5915	13.7238	11.2373	NRF1	0.564899	-0.3103	0.515273	0.844443	-1.61431		-0.683311	0.168566	-0.404329	1.6676	-0.748527
RCOR3	REST corepressor 3 [Source:NCBI gene;Acc:421380]	4	8	-4	4	67.2893	49.9241	63.0424	45.2903	21.4162		25.3212	29.9834	25.5864	28.1237	31.0681	RCOR3	0.990304	0.0294158	0.755306	-0.226987	-1.54804		-1.04992	0.766139	-0.946607	0.0417368	1.18865
SCRT2	scratch family transcriptional repressor 2 [Source:NCBI gene;Acc:100379662]	4	8	-4	4	2.63174	1.77207	6.31746	0.885553	1.04853		0.0816787	0.0423857	0.184604	0.14477	0.120582	SCRT2	0.0452141	-0.340898	1.70063	-0.739072	-0.665872		-0.601161	-1.31425	1.26673	0.543829	0.104849
WDHD1	WD repeat and HMG-box DNA binding protein 1 [Source:NCBI gene;Acc:423558]	4	8	-4	4	55.8434	42.5245	36.1929	55.8502	8.38834		16.6488	15.3044	17.2721	18.8266	16.2502	WDHD1	0.824494	0.141726	-0.182854	0.82484	-1.60821		-0.161433	-1.18702	0.31405	1.49988	-0.465473
CTCF	CCCTC-binding factor [Source:NCBI gene;Acc:396274]	5	9	-4	4	119.867	113.888	121.063	124.933	71.5403		52.859	53.313	56.9344	68.3558	61.8094	CTCF	0.436687	0.164973	0.49104	0.666905	-1.7596		-0.891197	-0.821391	-0.264484	1.49189	0.485184
GLIS1	GLIS family zinc finger 1 [Source:NCBI gene;Acc:424652]	5	9	-4	4	1.17752	0.323248	89.1928	1.52656	7.31626		7.27497	6.58795	7.99917	9.16667	8.16944	GLIS1	-0.482348	-0.504348	1.78431	-0.473359	-0.324257		-0.580807	-1.28746	0.16409	1.36495	0.339226
HEY2	hes related family bHLH transcription factor with YRPW motif 2 [Source:NCBI gene;Acc:421718]	5	9	-4	4	6.94981	0.958156	60.5284	0.739912	20.873		12.3414	12.8706	17.0046	17.4372	15.9967	HEY2	-0.440001	-0.678366	1.69151	-0.687049	0.113905		-1.17663	-0.953315	0.79089	0.973415	0.365639
IRF4	interferon regulatory factor 4 [Source:NCBI gene;Acc:374179]	5	9	-4	4	0.155714	0.233618	4.67605	0.0957915	0.0777043		0.160013	0.273849	0.149871	0.952037	0.444537	IRF4	-0.439617	-0.401225	1.78805	-0.469147	-0.47806		-0.709521	-0.36735	-0.740005	1.67117	0.14571
NR3C2	nuclear receptor subfamily 3 group C member 2 [Source:NCBI gene;Acc:374131]	5	9	-4	4	60.8461	56.0893	183.03	56.7421	42.2504		15.4169	16.8974	19.8234	18.6518	19.1274	NR3C2	-0.325878	-0.407699	1.77579	-0.39647	-0.645739		-1.42873	-0.604542	1.0243	0.372107	0.636863
SMARCE1	SWI/SNF related, matrix associated, actin dependent regulator of chromatin, subfamily e, member 1 [Source:NCBI gene;Acc:420047]	5	9	-4	4	328.972	334.597	295.558	336.071	184.52		142.408	138.418	147.179	167.197	154.087	SMARCE1	0.512535	0.599826	-0.00598106	0.622702	-1.72908		-0.658443	-1.01103	-0.236768	1.53249	0.373742
TADA2A	transcriptional adaptor 2A [Source:NCBI gene;Acc:417656]	5	9	-4	4	29.8896	31.5724	36.5719	35.5158	14.0286		15.2718	14.7392	17.3109	16.6685	17.8905	TADA2A	0.041166	0.226439	0.77685	0.660586	-1.70504		-0.825907	-1.22427	0.699069	0.218602	1.1325
TBX4	T-box 4 [Source:NCBI gene;Acc:373989]	5	9	-4	4	0.941212	0.0176389	5.41998	0.148267	0.0130288		0.404888	0.486838	1.47511	2.62145	1.3092	TBX4	-0.157379	-0.553632	1.76421	-0.497587	-0.55561		-0.950854	-0.859674	0.239897	1.51533	0.0553001
YY2	YY2 transcription factor [Source:NCBI gene;Acc:423455]	5	9	-4	4	82.6656	76.9825	82.4791	92.1298	67.6068		69.8526	71.5779	66.4092	73.5293	69.5095	YY2	0.255398	-0.377636	0.234619	1.30961	-1.42199		-0.122233	0.530463	-1.42494	1.26874	-0.252027
ZGPAT	#N/A	5	9	-4	4	30.0425	31.3218	27.3399	25.3469	20.3544		15.4245	16.0094	16.4751	18.1111	16.4945	ZGPAT	0.730702	1.02638	0.106038	-0.354602	-1.50852		-1.07929	-0.493899	-0.0278313	1.60946	-0.00844425
ZNF410	zinc finger protein 410 [Source:NCBI gene;Acc:423340]	5	9	-4	4	38.2596	46.619	34.8245	38.1893	25.0829		37.5763	45.7443	41.4029	43.303	45.2921	ZNF410	0.21424	1.29018	-0.227891	0.205195	-1.48172		-1.52908	0.925917	-0.37896	0.192133	0.789986
ZNF512	zinc finger protein 512 [Source:NCBI gene;Acc:769868]	5	9	-4	4	60.4919	60.439	66.2256	63.8506	48.4809		46.5955	46.2976	45.5284	47.9519	46.7441	ZNF512	0.0869969	0.079258	0.926346	0.578676	-1.67128		-0.0318789	-0.371077	-1.24688	1.51252	0.137319
ARID4B	AT-rich interaction domain 4B [Source:NCBI gene;Acc:425840]	6	10	-4	4	36.8545	43.1185	45.4435	42.3662	30.3741		22.5428	22.7149	22.8334	23.6366	24.34	ARID4B	-0.458329	0.57557	0.959316	0.451388	-1.52794		-0.886271	-0.658857	-0.502346	0.558977	1.4885
CASZ1	castor zinc finger 1 [Source:NCBI gene;Acc:419452]	6	10	-4	4	78.4688	2.75208	29.8858	13.5843	106.334		24.2615	24.3695	26.5018	40.0838	38.4633	CASZ1	0.727147	-0.979317	-0.367791	-0.735187	1.35515		-0.823138	-0.809403	-0.538313	1.18844	0.982419
CSDE1	cold shock domain containing E1 [Source:NCBI gene;Acc:419886]	6	10	-4	4	649.957	743.96	556.395	674.456	517.435		396.556	377.174	408.669	429.564	435.616	CSDE1	0.235332	1.26347	-0.787985	0.503282	-1.2141		-0.540717	-1.34939	-0.0353249	0.836455	1.08898
GATA6	GATA binding protein 6 [Source:NCBI gene;Acc:396390]	6	10	-4	4	0.703387	0.541741	1.50716	0.101038	1.27339		1.51035	1.55722	2.02283	2.4118	2.46571	GATA6	-0.215126	-0.500262	1.20269	-1.27764	0.79034		-1.0656	-0.962245	0.0645024	0.922241	1.0411
GLI1	GLI family zinc finger 1 [Source:NCBI gene;Acc:396045]	6	10	-4	4	26.7692	18.4212	98.9392	82.0339	12.2375		8.0697	10.9883	14.6789	19.5419	18.6804	GLI1	-0.524532	-0.733933	1.28578	0.861729	-0.889045		-1.28681	-0.692762	0.0584294	1.04825	0.872894
JARID2	jumonji and AT-rich interaction domain containing 2 [Source:NCBI gene;Acc:420839]	6	10	-4	4	69.6139	61.9725	87.3443	61.1626	91.5023		20.5285	20.0683	22.8544	26.8039	26.4793	JARID2	-0.330122	-0.866249	0.913854	-0.923071	1.20559		-0.883564	-1.02786	-0.154393	1.0838	0.982016
LYAR	Ly1 antibody reactive [Source:NCBI gene;Acc:422846]	6	10	-4	4	41.2848	48.5603	35.367	64.8132	27.5064		35.084	33.0987	38.3189	44.5761	46.267	LYAR	-0.156434	0.355882	-0.573142	1.50035	-1.12665		-0.759232	-1.10297	-0.199118	0.88428	1.17704
NFRKB	nuclear factor related to kappaB binding protein [Source:NCBI gene;Acc:419730]	6	10	-4	4	36.0364	42.2937	41.212	40.1512	24.6333		19.0277	18.665	19.6339	21.5565	20.7478	NFRKB	-0.114549	0.750144	0.600665	0.454062	-1.69032		-0.745082	-1.04591	-0.24239	1.352	0.681375
RUNX2	runt related transcription factor 2 [Source:NCBI gene;Acc:373919]	6	10	-4	4	33.9284	21.059	149.334	63.0043	98.5144		1.29943	1.93824	3.87566	8.85005	10.276	RUNX2	-0.755094	-1.00274	1.46567	-0.195581	0.487744		-0.96704	-0.810583	-0.336076	0.882235	1.23146
RUNX3	runt related transcription factor 3 [Source:NCBI gene;Acc:769687]	6	10	-4	4	68.0313	0.597058	37.0173	11.8004	108.56		3.93568	6.18813	9.95245	31.1529	34.6763	RUNX3	0.520086	-1.01612	-0.186436	-0.760896	1.44336		-0.908717	-0.754185	-0.495929	0.958554	1.20028
SETDB2	SET domain bifurcated histone lysine methyltransferase 2 [Source:HGNC Symbol;Acc:HGNC:20263]	6	10	-4	4	24.3378	29.7425	28.6529	34.9916	14.1387		14.5678	14.6592	16.7351	17.8251	18.293	SETDB2	-0.260198	0.430889	0.291559	1.10206	-1.56431		-1.0621	-1.00959	0.183346	0.809758	1.07859
SMARCC1	SWI/SNF related, matrix associated, actin dependent regulator of chromatin subfamily c member 1 [Source:NCBI gene;Acc:420378]	6	10	-4	4	246.735	439.512	235.797	378.862	142.235		51.2964	52.4401	57.3335	79.1072	71.1553	SMARCC1	-0.351299	1.26524	-0.443018	0.756658	-1.22758		-0.892839	-0.799758	-0.401491	1.37064	0.723449
SP3	Sp3 transcription factor [Source:NCBI gene;Acc:395302]	6	10	-4	4	97.2137	69.3404	119.878	102.822	98.9913		77.1535	74.1767	76.1962	75.5544	78.1523	SP3	-0.0239219	-1.55584	1.22168	0.284304	0.0737746		0.597345	-1.36336	-0.0331897	-0.455951	1.25516
ZBTB49	zinc finger and BTB domain containing 49 [Source:NCBI gene;Acc:422847]	6	10	-4	4	12.3339	15.8098	12.0884	13.9023	8.36096		9.31317	10.2859	11.2202	10.5808	11.0533	ZBTB49	-0.0600706	1.20391	-0.149319	0.510257	-1.50477		-1.55785	-0.270872	0.965126	0.119242	0.744351
ZNF236	zinc finger protein 236 [Source:NCBI gene;Acc:421008]	6	10	-4	4	13.9234	15.0425	19.7337	16.7509	11.597		7.93793	8.59349	9.32318	10.3393	10.1463	ZNF236	-0.48616	-0.120068	1.41461	0.438835	-1.24721		-1.30644	-0.662553	0.0541506	1.05222	0.862629
ZNF407	zinc finger protein 407 [Source:NCBI gene;Acc:421011]	6	10	-4	4	23.0034	26.3392	24.7496	33.4373	17.5353		9.91932	10.7679	11.7289	13.2357	12.0366	ZNF407	-0.348827	0.230215	-0.0457205	1.46233	-1.298		-1.28138	-0.609508	0.151394	1.34447	0.39503
LIN28B	lin-28 homolog B [Source:NCBI gene;Acc:421786]	7	11	-4	4	2.03384	8.19318	0.643136	14.4446	1.0562		0	0	0.0583675	0	0.123286	LIN28B	-0.54317	0.489299	-0.776289	1.53721	-0.707048		-0.663122	-0.663122	0.402224	-0.663122	1.58714
RXRA	retinoid X receptor alpha [Source:NCBI gene;Acc:417143]	7	11	-4	4	46.2028	57.6334	90.4896	90.3349	56.6873		26.9109	23.0288	25.5544	24.485	31.556	RXRA	-1.06576	-0.513697	1.07316	1.06569	-0.559392		0.185151	-1.00513	-0.230744	-0.558658	1.60938
ZBTB11	zinc finger and BTB domain containing 11 [Source:HGNC Symbol;Acc:HGNC:16740]	7	11	-4	4	22.7696	27.485	23.463	33.3302	25.5732		22.116	24.2484	24.1228	23.9244	25.5815	ZBTB11	-0.887337	0.227058	-0.723446	1.60847	-0.22475		-1.52039	0.201684	0.100292	-0.0599072	1.27832
MYOD1	myogenic differentiation 1 [Source:NCBI gene;Acc:374048]	5	1	4	4	0.30812	0.0626512	0.50837	0.0609069	0.484305		1.76295	0.111642	0	0.112637	0.155562	MYOD1	0.106728	-1.02013	1.026	-1.02814	0.915532		1.78354	-0.423589	-0.572808	-0.422259	-0.364886
SIM1	SIM bHLH transcription factor 1 [Source:NCBI gene;Acc:396129]	5	1	4	4	1.06353	0.0141467	6.42817	0	1.31765		1.75567	1.39355	1.06354	1.09454	1.14998	SIM1	-0.262139	-0.654464	1.74349	-0.659753	-0.167133		1.60014	0.351902	-0.785615	-0.678759	-0.487666
SOX10	SRY-box 10 [Source:NCBI gene;Acc:395573]	6	2	4	4	24.5398	40.8274	17.1138	39.3431	3.35805		27.1902	22.4842	18.0247	16.4739	13.1182	SOX10	-0.0316145	1.00526	-0.504357	0.91077	-1.38006		1.41109	0.552233	-0.261619	-0.544637	-1.15706
AR	androgen receptor [Source:NCBI gene;Acc:422165]	7	3	4	4	3.70608	6.60725	11.9522	3.01791	5.98842		74.8742	73.0469	64.574	50.6531	40.2755	AR	-0.723455	0.100182	1.6176	-0.918825	-0.0755034		0.95316	0.830413	0.261257	-0.673863	-1.37097
FOXS1	forkhead box S1 [Source:HGNC Symbol;Acc:HGNC:3735]	7	3	4	4	0.138176	0	1.88787	0	2.42104		8.23363	6.96681	5.85206	2.82935	5.84264	FOXS1	-0.641286	-0.759239	0.852315	-0.759239	1.30745		1.14407	0.510823	-0.0464062	-1.55737	-0.0511183
HIVEP1	human immunodeficiency virus type I enhancer binding protein 1 [Source:NCBI gene;Acc:420856]	7	3	4	4	30.2079	69.2853	58.123	45.2713	25.408		26.7452	25.0947	25.2667	20.2427	19.788	HIVEP1	-0.837176	1.28011	0.675321	-0.0210125	-1.09725		1.04192	0.523587	0.577599	-1.00016	-1.14294
HOXA7	homeobox A7 [Source:NCBI gene;Acc:395290]	7	3	4	4	19.999	84.047	28.3477	37.5166	11.2234		57.6616	51.8956	54.41	46.4928	39.8211	HOXA7	-0.57027	1.68049	-0.276883	0.0453272	-0.878659		1.08198	0.261676	0.619389	-0.506952	-1.45609
HSF3	Heat shock factor protein 3 [Source:NCBI gene;Acc:422169]	7	3	4	4	17.2036	26.1843	37.3867	33.2204	19.378		61.0348	58.0458	59.2441	51.4296	45.5665	HSF3	-1.0922	-0.0565432	1.23533	0.754867	-0.841449		0.928432	0.46364	0.649979	-0.565178	-1.47687
IRX4	iroquois homeobox 4 [Source:NCBI gene;Acc:373974]	7	3	4	4	16.9621	696.283	2.69943	328.914	9.88094		62.1642	52.5994	42.6036	25.2862	23.2274	IRX4	-0.637054	1.59385	-0.683893	0.387403	-0.660309		1.23906	0.674387	0.084269	-0.938087	-1.05963
PKNOX2	PBX/knotted 1 homeobox 2 [Source:NCBI gene;Acc:374067]	7	3	4	4	12.5931	22.183	16.1117	22.08	8.43746		13.6771	12.7584	12.955	10.7586	10.8269	PKNOX2	-0.615492	0.984985	-0.0282666	0.967798	-1.30902		1.1181	0.42495	0.57324	-1.08392	-1.03237
SOX6	SRY-box 6 [Source:NCBI gene;Acc:423068]	7	3	4	4	4.28786	58.6122	77.7774	54.7697	6.33721		2.23351	2.00474	1.7223	1.07675	1.37413	SOX6	-1.08757	0.550444	1.12832	0.434583	-1.02578		1.18124	0.690981	0.0857492	-1.29762	-0.660349
BACH1	BTB domain and CNC homolog 1 [Source:NCBI gene;Acc:418488]	8	4	4	4	29.8579	22.2959	31.5542	27.6158	42.6652		55.9232	51.6177	56.1647	43.2257	42.0115	BACH1	-0.125401	-1.13434	0.100919	-0.424556	1.58338		0.901594	0.268833	0.937086	-0.964534	-1.14298
CLOCK	clock circadian regulator [Source:NCBI gene;Acc:373991]	8	4	4	4	9.98353	10.139	10.4018	13.6653	10.6395		36.6485	38.3676	35.2829	28.7049	29.0465	CLOCK	-0.642129	-0.540485	-0.368722	1.76467	-0.213338		0.681319	1.06681	0.375115	-1.09992	-1.02332
FOXO4	#N/A	8	4	4	4	27.7721	30.6038	43.0421	35.8151	52.2692		54.8143	52.4941	53.9366	52.7027	46.1918	FOXO4	-1.02172	-0.736069	0.518674	-0.210365	1.44948		0.820421	0.137258	0.561991	0.19869	-1.71836
HIVEP2	human immunodeficiency virus type I enhancer binding protein 2 [Source:NCBI gene;Acc:421672]	8	4	4	4	6.83897	10.654	16.4092	15.7939	11.0047		31.1877	33.8539	30.5058	21.8721	24.0653	HIVEP2	-1.33392	-0.373969	1.0742	0.919387	-0.285699		0.568834	1.09349	0.434655	-1.26428	-0.832698
HOPX	HOP homeobox [Source:NCBI gene;Acc:395241]	8	4	4	4	0.938917	1.37654	1.26666	6.07649	53.0188		410.125	443.771	426.614	310.04	255.574	HOPX	-0.510188	-0.490935	-0.495769	-0.284162	1.78105		0.498345	0.90831	0.699264	-0.721139	-1.38478
MAFF	MAF bZIP transcription factor F [Source:NCBI gene;Acc:395519]	8	4	4	4	22.4283	20.054	31.1093	35.8206	110.137		56.3707	60.2497	51.5021	39.6614	54.9962	MAFF	-0.571781	-0.634977	-0.340717	-0.215314	1.76279		0.485369	0.978916	-0.134096	-1.64066	0.310471
MXD4	MAX dimerization protein 4 [Source:NCBI gene;Acc:422890]	8	4	4	4	29.799	48.9196	77.855	33.9923	62.5178		70.6123	62.6045	74.9511	65.2308	55.3367	MXD4	-1.04213	-0.0849571	1.36354	-0.832214	0.595762		0.645963	-0.417245	1.22205	-0.0685471	-1.38222
NFE2L1	nuclear factor, erythroid 2 like 1 [Source:NCBI gene;Acc:417987]	8	4	4	4	87.235	85.1178	101.07	103.858	185.77		127.546	130.04	120.002	125.06	114.539	NFE2L1	-0.608242	-0.658992	-0.276613	-0.209791	1.75364		0.661933	1.0638	-0.553493	0.26145	-1.43369
NR4A3	nuclear receptor subfamily 4 group A member 3 [Source:NCBI gene;Acc:420996]	8	4	4	4	1.10772	3.93554	6.57319	25.6242	5.04102		8.53616	8.53384	7.98428	4.11709	4.94476	NR4A3	-0.749639	-0.46117	-0.192101	1.75131	-0.348398		0.806138	0.805047	0.546412	-1.27356	-0.88404
ZBTB32	zinc finger and BTB domain containing 32 [Source:NCBI gene;Acc:419759]	8	4	4	4	0.217258	0.0540653	0.502779	0.933324	6.6286		25.9204	14.8738	22.3112	22.8994	10.201	ZBTB32	-0.519044	-0.577463	-0.416835	-0.262711	1.77605		1.02996	-0.673463	0.473402	0.564115	-1.39402
ZFP36L2	ZFP36 ring finger protein like 2 [Source:NCBI gene;Acc:107052930]	8	4	4	4	183.989	402.437	355.174	296.416	186.164		304.161	285.722	346.033	260.659	237.109	ZFP36L2	-1.02371	1.19378	0.714014	0.117547	-1.00163		0.417594	-0.0243241	1.42115	-0.625004	-1.18942
ATF4	activating transcription factor 4 [Source:NCBI gene;Acc:395693]	9	5	4	4	521.538	610.616	558.831	790.274	1910.07		1119.34	1144.77	1065.46	1037.87	1138.79	ATF4	-0.608814	-0.456789	-0.545169	-0.150173	1.76095		0.382987	0.921214	-0.757394	-1.34147	0.794665
CREBL2	cAMP responsive element binding protein like 2 [Source:NCBI gene;Acc:426496]	9	5	4	4	19.5134	27.8592	29.3051	26.6968	38.8725		42.9888	35.2461	44.8509	41.8646	36.7004	CREBL2	-1.28764	-0.0850456	0.1233	-0.252543	1.50193		0.640672	-1.22514	1.08939	0.369768	-0.874689
GLMP	#N/A	9	5	4	4	25.155	28.4574	27.2865	31.279	38.9306		36.3059	39.2085	35.2602	38.569	30.9896	GLMP	-0.947574	-0.329954	-0.548946	0.197734	1.62874		0.0732956	0.962568	-0.247058	0.76662	-1.55543
MAX	MYC associated factor X [Source:NCBI gene;Acc:100858676]	9	5	4	4	55.7251	71.5419	61.2761	55.5908	57.6859		31.572	29.256	31.1874	34.5335	23.6898	MAX	-0.696864	1.67917	0.137029	-0.717033	-0.402304		0.378734	-0.196726	0.283154	1.11454	-1.57971
NR1D2	nuclear receptor subfamily 1 group D member 2 [Source:NCBI gene;Acc:396125]	9	5	4	4	9.62504	16.4422	20.9138	26.7193	58.9572		120.94	92.2627	121.589	50.9307	81.8603	NR1D2	-0.881717	-0.526184	-0.292978	0.0097915	1.69109		0.92827	-0.0424469	0.950228	-1.44149	-0.394557
PPARA	peroxisome proliferator activated receptor alpha [Source:NCBI gene;Acc:374120]	9	5	4	4	4.90682	9.51298	6.8796	9.42227	33.5872		39.6171	42.1016	45.028	34.6539	37.3962	PPARA	-0.677382	-0.285157	-0.509395	-0.292882	1.76482		-0.0353228	0.581407	1.30785	-1.26734	-0.586599
PPARG	peroxisome proliferator-activated receptor gamma [Source:NCBI gene;Acc:373928]	9	5	4	4	3.06937	28.5077	5.26686	42.9163	30.049		68.55	104.565	78.9835	60.0646	62.5073	PPARG	-1.09857	0.380634	-0.970792	1.21847	0.470259		-0.35268	1.63692	0.223709	-0.821449	-0.686501
RARA	retinoic acid receptor alpha [Source:NCBI gene;Acc:395213]	10	6	4	4	57.0874	85.5758	69.1942	97.5085	135.545		108.755	116.56	98.5944	109.977	113.683	RARA	-1.05423	-0.112594	-0.654058	0.281819	1.53906		-0.111002	1.03039	-1.59678	0.0677222	0.609664
TFB1M	transcription factor B1, mitochondrial [Source:NCBI gene;Acc:428608]	11	7	4	4	25.0541	26.7019	23.1306	28.5419	29.8294		23.3396	20.7081	23.9127	28.4251	21.5521	TFB1M	-0.597185	0.018799	-1.31622	0.706644	1.18796		-0.0826241	-0.959758	0.108381	1.61245	-0.678449
ZNF276	zinc finger protein 276 [Source:NCBI gene;Acc:415853]	11	7	4	4	20.3843	24.2187	20.3946	22.63	24.9131		20.034	20.8007	18.9254	20.3657	20.6781	ZNF276	-1.00956	0.813113	-1.00467	0.0579121	1.14321		-0.168567	0.851049	-1.64306	0.272558	0.688019
GSC	goosecoid homeobox [Source:NCBI gene;Acc:396273]	1	4	-3	3	11.5972	0	1.99636	0.362742	0.0709953		1.08054	1.32993	0.931943	0.943884	0.433593	GSC	1.76485	-0.563168	-0.162419	-0.490351	-0.548916		0.417364	1.17955	-0.0367792	-0.000285828	-1.55985
SHOX	short stature homeobox [Source:NCBI gene;Acc:418669]	1	4	-3	3	18.3182	0	7.31511	0	0.795601		0.598475	0.772674	0.49971	0.268645	0.0977987	SHOX	1.64848	-0.668601	0.256692	-0.668601	-0.567965		0.565219	1.21721	0.195561	-0.669275	-1.30872
ZBTB18	zinc finger and BTB domain containing 18 [Source:NCBI gene;Acc:428580]	1	4	-3	3	36.9579	13.2431	12.6724	9.31184	5.14017		11.7113	12.0452	12.0044	10.7672	10.6933	ZBTB18	1.72754	-0.178599	-0.224467	-0.494582	-0.82989		0.401582	0.903716	0.842377	-1.01827	-1.12941
FLI1	Fli-1 proto-oncogene, ETS transcription factor [Source:NCBI gene;Acc:419723]	2	5	-3	3	41.1845	0.209533	25.9044	0.0788434	8.84851		39.0409	43.0221	41.661	40.8692	30.1793	FLI1	1.44809	-0.839379	0.59506	-0.846674	-0.357099		0.0169038	0.795628	0.529396	0.374513	-1.71644
PITX1	paired like homeodomain 1 [Source:NCBI gene;Acc:374201]	2	5	-3	3	14.6889	0	9.12762	0.0497005	1.14542		2.68923	4.30438	3.24225	2.11467	2.17582	PITX1	1.46332	-0.755687	0.623196	-0.748179	-0.582652		-0.238764	1.54627	0.372423	-0.873754	-0.806171
SNAI1	snail family transcriptional repressor 1 [Source:NCBI gene;Acc:396047]	2	5	-3	3	99.5365	0.359103	85.0719	0.385979	5.73508		10.1822	12.1892	9.47886	11.2396	8.85142	SNAI1	1.23412	-0.761951	0.942998	-0.761411	-0.653753		-0.153577	1.34237	-0.677856	0.6346	-1.14554
EN1	engrailed homeobox 1 [Source:NCBI gene;Acc:771008]	3	6	-3	3	24.2446	0	35.2199	0.0344782	1.70451		4.0066	6.48983	4.75683	5.8279	3.80219	EN1	0.729867	-0.744265	1.39719	-0.742168	-0.640626		-0.83622	1.30437	-0.189511	0.733778	-1.01242
FOXP4	forkhead box protein P4-like [Source:NCBI gene;Acc:100858652]	3	6	-3	3	69.5082	52.8984	17.6742	40.9671	24.4986		11.7618	13.3537	12.6686	12.4993	11.3244	FOXP4	1.3498	0.560336	-1.11387	-0.00675698	-0.789507		-0.704544	1.29911	0.436831	0.223641	-1.25503
HOXB2	homeobox B2 [Source:NCBI gene;Acc:429940]	3	6	-3	3	19.8669	0.0595158	26.9328	0.342055	2.0104		8.43557	7.87115	7.67752	9.38285	6.85096	HOXB2	0.792587	-0.773476	1.35125	-0.751137	-0.619229		0.417043	-0.183497	-0.389513	1.42493	-1.26896
TERF1	telomeric repeat binding factor 1 [Source:NCBI gene;Acc:378896]	3	6	-3	3	39.1249	24.8834	25.0731	34.6353	5.901		20.3177	18.2189	21.9344	20.8857	18.1713	TERF1	1.03332	-0.081418	-0.0665689	0.681901	-1.56723		0.24737	-1.01255	1.21794	0.58838	-1.04115
BCL11B	B-cell CLL/lymphoma 11B [Source:NCBI gene;Acc:423444]	4	7	-3	3	277.288	153.368	296.343	299.498	27.3482		16.4724	12.4485	22.0993	10.1546	20.4007	BCL11B	0.559403	-0.482723	0.719648	0.746188	-1.54252		0.0309904	-0.761701	1.13944	-1.21357	0.804838
CENPT	centromere protein T [Source:NCBI gene;Acc:415654]	4	7	-3	3	48.9708	38.7635	34.7435	56.5885	14.6673		25.1769	24.6286	24.2746	28.7063	23.4659	CENPT	0.640663	0.00104968	-0.25085	1.11801	-1.50887		-0.0362499	-0.306459	-0.480883	1.70299	-0.879399
E2F6	E2F transcription factor 6 [Source:NCBI gene;Acc:421943]	4	7	-3	3	36.2326	34.763	31.15	36.2025	24.4416		41.8565	41.6344	44.172	44.5253	39.6411	E2F6	0.73676	0.442098	-0.282288	0.730724	-1.6273		-0.253561	-0.364106	0.899033	1.0749	-1.35627
TBX18	T-box 18 [Source:NCBI gene;Acc:395104]	4	7	-3	3	24.2826	0	54.5271	0.0394165	4.87881		18.4599	18.5133	23.4239	22.2464	18.4227	TBX18	0.322511	-0.71655	1.61669	-0.714863	-0.507783		-0.721659	-0.69967	1.32148	0.83681	-0.736961
ARID2	AT-rich interaction domain 2 [Source:NCBI gene;Acc:417804]	5	8	-3	3	49.2565	54.3718	65.7945	49.4053	36.1445		13.6177	12.2903	14.9111	14.8898	13.8332	ARID2	-0.162689	0.316134	1.38536	-0.14876	-1.39005		-0.268866	-1.49644	0.927294	0.907565	-0.069556
BCLAF1	BCL2-associated transcription factor 1 [Source:NCBI gene;Acc:100858086]	5	8	-3	3	162.168	181.276	149.528	158.825	63.0119		76.6174	75.6102	75.4337	85.4192	76.7939	BCLAF1	0.416067	0.830004	0.142232	0.343649	-1.73195		-0.322877	-0.562443	-0.604417	1.77064	-0.280907
ETV4	ETS variant 4 [Source:NCBI gene;Acc:395747]	5	8	-3	3	30.5188	37.0067	29.6146	32.8476	12.764		15.7791	18.4211	17.5495	17.7337	16.7818	ETV4	0.212203	0.911619	0.114734	0.463254	-1.70181		-1.45979	1.15688	0.293621	0.476021	-0.466727
FUBP3	far upstream element binding protein 3 [Source:NCBI gene;Acc:417184]	5	8	-3	3	130.3	134.04	139.052	138.728	89.4928		68.1749	67.4226	71.6415	79.1884	70.2366	FUBP3	0.190259	0.369205	0.608989	0.593479	-1.76193		-0.672232	-0.832392	0.065718	1.67226	-0.233354
LITAF	lipopolysaccharide induced TNF factor [Source:NCBI gene;Acc:374125]	5	8	-3	3	0.556423	0	1.37815	0.551263	0.367669		1.82592	2.065	1.35158	4.25893	1.34052	LITAF	-0.028281	-1.13045	1.5994	-0.0385023	-0.402166		-0.283166	-0.0854828	-0.675372	1.72853	-0.684513
PBX4	PBX homeobox 4 [Source:NCBI gene;Acc:426087]	5	8	-3	3	28.6412	38.009	35.6255	32.8172	12.5137		9.5646	9.75407	9.50417	12.5064	10.0389	PBX4	-0.0869113	0.838151	0.602782	0.325465	-1.67949		-0.560303	-0.410576	-0.60806	1.76446	-0.185524
SOX18	SRY-box 18 [Source:NCBI gene;Acc:374200]	5	8	-3	3	35.6227	0.0231582	480.5	0.177866	53.6159		50.5563	63.3106	72.1247	76.4983	61.9078	SOX18	-0.380062	-0.552717	1.77754	-0.551966	-0.292798		-1.42533	-0.156127	0.720977	1.1562	-0.295719
USF1	upstream transcription factor 1 [Source:NCBI gene;Acc:425126]	5	8	-3	3	151.874	157.229	153.43	167.028	106.816		93.6115	92.1163	87.0818	98.1442	90.763	USF1	0.196735	0.425846	0.263319	0.845112	-1.73101		0.313408	-0.0561053	-1.30033	1.4336	-0.390578
ZBTB14	zinc finger and BTB domain containing 14 [Source:NCBI gene;Acc:396070]	5	8	-3	3	22.0213	20.1123	24.5489	24.3741	13.5938		14.8908	14.3355	16.4448	17.2024	15.0312	ZBTB14	0.243036	-0.182142	0.805988	0.767058	-1.63394		-0.577911	-1.04285	0.723324	1.35773	-0.460293
CSRNP2	cysteine and serine rich nuclear protein 2 [Source:NCBI gene;Acc:100859835]	6	9	-3	3	25.1138	31.4917	32.2255	31.9245	13.2282		5.85307	6.51456	5.8317	8.33307	7.45353	CSRNP2	-0.206864	0.577094	0.667295	0.630293	-1.66782		-0.871614	-0.260925	-0.891343	1.41794	0.605943
FOXJ1	forkhead box J1 [Source:NCBI gene;Acc:770009]	6	9	-3	3	0.155693	0.0481317	3.10728	0.371936	2.08988		0.501793	0.600794	0.664657	0.99933	0.763163	FOXJ1	-0.728402	-0.806837	1.42393	-0.570716	0.682028		-1.07678	-0.554614	-0.217781	1.5474	0.301774
KIAA1549	KIAA1549 [Source:NCBI gene;Acc:100857885]	6	9	-3	3	66.604	96.5303	52.3128	69.6939	29.2775		21.0813	22.2081	24.5349	23.0647	23.2147	KIAA1549	0.150834	1.36415	-0.42858	0.276109	-1.36251		-1.35889	-0.478585	1.33915	0.190574	0.307752
MAFB	MAF bZIP transcription factor B [Source:NCBI gene;Acc:419173]	6	9	-3	3	197.341	12.6151	67.7611	53.7162	140.652		69.2373	65.0903	65.6879	77.0753	68.6166	MAFB	1.39451	-1.10833	-0.361161	-0.551454	0.626436		0.0200295	-0.846718	-0.72181	1.6582	-0.109701
NCOR1	#N/A	6	9	-3	3	68.4017	84.707	95.3988	83.1992	50.9096		26.9192	25.5565	28.1011	29.1495	28.3623	NCOR1	-0.470896	0.4745	1.09442	0.387075	-1.4851		-0.497966	-1.4694	0.344602	1.09198	0.530777
NKRF	NFKB repressing factor [Source:NCBI gene;Acc:422370]	6	9	-3	3	29.9481	32.8848	28.8798	39.1961	27.944		20.8637	21.9818	20.0814	25.064	25.6368	NKRF	-0.40081	0.24504	-0.635747	1.63307	-0.841553		-0.745411	-0.29776	-1.05861	0.936225	1.16556
TFCP2	transcription factor CP2 [Source:NCBI gene;Acc:378900]	6	9	-3	3	80.9138	98.036	79.6012	104.454	41.5378		28.795	30.0557	30.2136	36.3808	33.2378	TFCP2	0.000211248	0.699292	-0.0533797	0.961346	-1.60747		-0.959178	-0.5481	-0.49661	1.51437	0.489519
ZNF609	zinc finger protein 609 [Source:NCBI gene;Acc:415331]	6	9	-3	3	89.5556	107.376	130.522	110.749	89.2287		47.2476	50.085	45.7303	53.845	54.0154	ZNF609	-0.92904	0.110211	1.46001	0.306927	-0.948107		-0.781134	-0.0265164	-1.18467	0.973499	1.01882
ZNF654	zinc finger protein 654 [Source:NCBI gene;Acc:418428]	6	9	-3	3	22.1138	26.2151	25.7017	29.1566	19.449		13.5073	14.024	15.6352	15.0167	16.624	ZNF654	-0.637827	0.446074	0.310382	1.22342	-1.34205		-1.16665	-0.752076	0.540541	0.0443261	1.33386
EGR4	early growth response 4 [Source:HGNC Symbol;Acc:HGNC:3241]	7	10	-3	3	0.465602	0.0873084	7.64714	9.23736	0.181217		0.296434	0.258115	0.280345	0.466729	1.14746	EGR4	-0.675502	-0.759063	0.910811	1.26207	-0.738319		-0.513189	-0.614878	-0.555884	-0.061271	1.74522
GTF2IRD1	GTF2I repeat domain containing 1 [Source:NCBI gene;Acc:417487]	7	10	-3	3	82.5275	33.624	55.4154	36.202	128.242		14.4709	13.7459	15.1908	19.7929	21.4722	GTF2IRD1	0.389633	-0.853702	-0.299672	-0.788156	1.5519		-0.710912	-0.920114	-0.503171	0.824801	1.3094
LEF1	lymphoid enhancer binding factor 1 [Source:NCBI gene;Acc:395865]	7	10	-3	3	434.593	1367.98	573.016	1046.25	69.7003		4.54318	10.4822	25.6647	57.4247	50.9113	LEF1	-0.51474	1.30712	-0.244553	0.679137	-1.22697		-1.06823	-0.817095	-0.175086	1.16792	0.892494
MLLT10	myeloid/lymphoid or mixed-lineage leukemia; translocated to, 10 [Source:NCBI gene;Acc:420509]	7	10	-3	3	27.6597	42.2806	40.8625	45.9516	30.3111		21.3224	21.1458	22.1111	23.8716	25.1781	MLLT10	-1.22381	0.610749	0.43282	1.07137	-0.891125		-0.804554	-0.9058	-0.352418	0.656883	1.40589
MYCN	v-myc avian myelocytomatosis viral oncogene neuroblastoma derived homolog [Source:NCBI gene;Acc:421948]	7	10	-3	3	50.024	116.072	83.934	57.4793	10.1897		12.1118	11.5683	11.9695	15.0129	14.2523	MYCN	-0.342167	1.32991	0.516301	-0.153427	-1.35061		-0.564726	-0.916996	-0.656979	1.31589	0.822817
NFX1	nuclear transcription factor, X-box binding 1 [Source:NCBI gene;Acc:420796]	7	10	-3	3	31.6138	33.1406	29.5533	38.6348	30.1366		20.4683	21.0451	21.0766	21.8727	23.6823	NFX1	-0.275197	0.144126	-0.841075	1.65302	-0.680878		-0.927172	-0.466431	-0.441249	0.19467	1.64018
NFXL1	nuclear transcription factor, X-box binding like 1 [Source:NCBI gene;Acc:100859761]	7	10	-3	3	23.3092	69.9897	24.1197	44.4324	24.4811		9.96455	10.1558	11.9972	16.5399	17.7037	NFXL1	-0.686526	1.60959	-0.64666	0.352481	-0.628884		-0.912186	-0.859447	-0.351626	0.901142	1.22212
SIX1	SIX homeobox 1 [Source:NCBI gene;Acc:693262]	7	10	-3	3	1.07795	46.7582	0.621348	19.5238	1.60454		3.33211	4.51918	4.80483	6.88762	6.15016	SIX1	-0.641321	1.64042	-0.664129	0.280053	-0.615018		-1.29041	-0.442549	-0.238524	1.24911	0.722377
SMARCA5	SWI/SNF related, matrix associated, actin dependent regulator of chromatin, subfamily a, member 5 [Source:NCBI gene;Acc:422457]	7	10	-3	3	132.616	186.502	104.743	185.954	115.578		80.1887	86.0005	85.3199	103.09	114.737	SMARCA5	-0.320729	1.06606	-1.03807	1.05197	-0.75923		-0.942418	-0.542	-0.588891	0.635414	1.43789
SOX14	SRY-box 14 [Source:NCBI gene;Acc:395526]	7	10	-3	3	1.56558	114.268	0.29745	40.1662	3.04199		0.155394	0.0530203	0.206055	0.61665	1.48314	SOX14	-0.618397	1.68159	-0.644277	0.169349	-0.588267		-0.590466	-0.764438	-0.504373	0.193386	1.66589
TGIF1	TGFB induced factor homeobox 1 [Source:NCBI gene;Acc:396339]	7	10	-3	3	73.4444	137.086	81.2674	119.611	49.4304		31.8142	33.6608	45.3647	50.2719	45.7435	TGIF1	-0.526086	1.26209	-0.306278	0.771099	-1.20082		-1.17398	-0.94714	0.490592	1.0934	0.537126
TRERF1	transcriptional regulating factor 1 [Source:NCBI gene;Acc:421386]	7	10	-3	3	2.87429	21.8377	4.45598	52.6594	15.3341		10.6279	10.3862	11.6442	15.0148	14.6234	TRERF1	-0.821487	0.119337	-0.743015	1.64849	-0.203322		-0.828803	-0.938215	-0.368896	1.15652	0.979396
TRPS1	transcriptional repressor GATA binding 1 [Source:NCBI gene;Acc:420289]	7	10	-3	3	8.88275	10.9381	375.049	21.3487	328.314		17.7247	21.8172	29.1388	38.7139	43.1925	TRPS1	-0.753207	-0.742151	1.21645	-0.686151	0.965058		-1.14535	-0.767125	-0.0904424	0.794503	1.20842
ZNF740	zinc finger protein 740 [Source:NCBI gene;Acc:100859343]	7	10	-3	3	42.5912	64.5885	46.8662	56.157	34.4628		38.8043	44.9399	47.1037	45.4966	45.2	ZNF740	-0.540273	1.33369	-0.176083	0.615404	-1.23274		-1.72537	0.197782	0.876013	0.37227	0.279301
ZNF767	zinc finger family member 767 [Source:NCBI gene;Acc:420372]	7	10	-3	3	10.3922	21.0327	11.8472	19.3175	7.97717		6.39622	7.68362	7.47143	8.86582	8.55497	ZNF767	-0.648763	1.20635	-0.395089	0.907315	-1.06982		-1.43491	-0.113701	-0.331465	1.09955	0.78053
FOS	Fos proto-oncogene, AP-1 transcription factor subunit [Source:NCBI gene;Acc:396512]	8	11	-3	3	2.20686	5.33667	90.706	236.552	36.5084		49.886	49.4985	46.0714	25.386	101.959	FOS	-0.739499	-0.707378	0.168763	1.66558	-0.387463		-0.16481	-0.178476	-0.299315	-1.02869	1.67129
RORA	RAR related orphan receptor A [Source:NCBI gene;Acc:415377]	8	11	-3	3	6.19086	3.57998	10.5002	14.4061	120.143		19.6122	15.4478	17.6069	17.5843	24.1711	RORA	-0.49523	-0.547423	-0.409084	-0.331003	1.78274		0.220401	-1.0408	-0.386912	-0.39376	1.60107
SMAD9	SMAD family member 9 [Source:NCBI gene;Acc:395543]	8	11	-3	3	11.5398	0.994296	19.4803	15.5633	50.3673		14.6205	14.6703	14.9984	13.4513	17.2926	SMAD9	-0.434287	-1.00326	-0.00586542	-0.217202	1.66062		-0.274603	-0.239234	-0.00585137	-1.10622	1.62591
RAD54L	RAD54-like (S. cerevisiae) [Source:NCBI gene;Acc:424611]	4	1	3	3	26.1782	18.201	16.5822	28.2314	6.88378		15.4306	13.6993	13.5819	13.083	13.6975	RAD54L	0.818028	-0.119165	-0.309355	1.05925	-1.44876		1.71494	-0.22292	-0.354358	-0.912775	-0.224883
E2F1	E2F transcription factor 1 [Source:NCBI gene;Acc:396142]	5	2	3	3	33.8171	23.7306	25.0646	49.0591	14.4013		64.8622	62.3123	53.711	50.0828	50.3571	E2F1	0.352554	-0.420071	-0.317881	1.52009	-1.13469		1.24698	0.87713	-0.370463	-0.896715	-0.856935
MAF1	MAF1 homolog, negative regulator of RNA polymerase III [Source:NCBI gene;Acc:100857613]	5	2	3	3	103.045	111.166	142.013	99.1103	62.3504		128.08	112.458	99.8848	103.164	85.4922	MAF1	-0.0172584	0.267458	1.34884	-0.15518	-1.44386		1.41159	0.421127	-0.376035	-0.16812	-1.28856
PAX7	paired box 7 [Source:NCBI gene;Acc:395942]	5	2	3	3	5.60922	10.2654	1.16151	3.89495	0.0142719		0.0506582	0.0322548	0	0	0	PAX7	0.350629	1.50021	-0.747488	-0.0726167	-1.03073		1.44263	0.663499	-0.702043	-0.702043	-0.702043
XBP1	X-box binding protein 1 [Source:NCBI gene;Acc:416918]	5	2	3	3	90.73	74.9701	94.9285	63.7533	87.6843		230.762	211.651	169.57	149.453	162.531	XBP1	0.648851	-0.58069	0.976399	-1.45579	0.41123		1.32552	0.774444	-0.438967	-1.01905	-0.641945
ZNF652	zinc finger protein 652 [Source:NCBI gene;Acc:419987]	5	2	3	3	44.4424	46.3902	49.5631	44.3439	17.5844		49.7014	46.8234	45.6689	44.64	41.3295	ZNF652	0.306816	0.457063	0.701806	0.299221	-1.76491		1.32927	0.389032	0.0118304	-0.324291	-1.40584
ARID5A	AT rich interactive domain 5A (MRF1-like) [Source:NCBI gene;Acc:101749459]	6	3	3	3	3.70555	3.27175	11.5563	5.96115	4.4775		14.3551	15.3461	12.3232	8.78671	8.33214	ARID5A	-0.61808	-0.746435	1.70486	0.0493265	-0.389668		0.794187	1.10571	0.155475	-0.956241	-1.09913
KLF2	Kruppel like factor 2 [Source:NCBI gene;Acc:420148]	6	3	3	3	17.1756	0.587547	48.3732	4.69067	41.8523		152.661	153.978	113.763	106.402	108.586	KLF2	-0.247936	-1.01521	1.1951	-0.825423	0.893474		1.06118	1.11579	-0.552305	-0.857623	-0.767041
TEAD1	TEA domain transcription factor 1 [Source:NCBI gene;Acc:403089]	6	3	3	3	156.303	184.968	287.816	186.941	63.7561		38.8262	38.1859	37.0851	33.8461	30.8457	TEAD1	-0.245245	0.112448	1.3958	0.137066	-1.40006		0.91629	0.725086	0.396359	-0.570882	-1.46685
ZNF438	zinc finger protein 438 [Source:NCBI gene;Acc:420474]	6	3	3	3	11.1134	12.7155	13.9161	11.1479	7.89599		11.8404	10.2426	11.2281	10.2407	10.1871	ZNF438	-0.107998	0.60008	1.13073	-0.0927577	-1.53006		1.45641	-0.673402	0.640287	-0.67591	-0.747383
BCL11A	B-cell CLL/lymphoma 11A [Source:NCBI gene;Acc:421199]	7	4	3	3	12.4889	79.5489	32.377	58.442	12.4607		16.0096	14.351	15.4584	13.4278	13.8202	BCL11A	-0.901843	1.37392	-0.226915	0.657633	-0.902798		1.27895	-0.240364	0.774021	-1.08606	-0.726553
CREB3L2	cAMP responsive element binding protein 3 like 2 [Source:NCBI gene;Acc:418123]	7	4	3	3	88.9752	322.833	84.3254	146.469	42.7006		82.8935	87.5698	86.3306	72.396	66.1325	CREB3L2	-0.436255	1.68541	-0.478439	0.0853585	-0.856079		0.408466	0.907311	0.775116	-0.711367	-1.37953
E2F5	E2F transcription factor 5 [Source:NCBI gene;Acc:420206]	7	4	3	3	10.1915	40.7034	8.9844	12.7394	6.38266		16.1316	18.8821	14.8531	13.7742	15.5266	E2F5	-0.397559	1.76518	-0.483122	-0.216963	-0.667537		0.155591	1.59141	-0.511821	-1.07497	-0.160208
ELMSAN1	#N/A	7	4	3	3	17.5072	19.5866	29.3124	25.3589	21.7999		25.2962	24.5544	27.1153	21.1783	20.0254	ELMSAN1	-1.10823	-0.66557	1.40491	0.563265	-0.194375		0.563708	0.31215	1.18061	-0.832754	-1.22371
GZF1	GDNF inducible zinc finger protein 1 [Source:NCBI gene;Acc:421233]	7	4	3	3	20.041	21.1201	23.4	21.0974	22.728		29.6098	30.0007	28.4561	25.6244	27.3795	GZF1	-1.20335	-0.409781	1.26692	-0.426477	0.77269		0.786358	1.00655	0.136335	-1.45905	-0.470201
JUN	Jun proto-oncogene, AP-1 transcription factor subunit [Source:NCBI gene;Acc:424673]	7	4	3	3	170.906	47.6169	384.036	268.55	334.625		429.899	425.504	378.401	229.464	345.365	JUN	-0.522477	-1.43955	1.06286	0.203836	0.695328		0.833572	0.779831	0.203884	-1.61723	-0.200058
KLF13	Kruppel like factor 13 [Source:NCBI gene;Acc:427493]	7	4	3	3	6.00962	0.18926	6.65298	0.652754	22.8158		54.7339	47.9964	57.1248	43.0396	43.2445	KLF13	-0.136555	-0.770135	-0.0665211	-0.719681	1.69289		0.848875	-0.189846	1.21747	-0.954044	-0.922458
LMX1A	LIM homeobox transcription factor 1, alpha [Source:NCBI gene;Acc:777133]	7	4	3	3	0.0743731	0.213624	0.340499	0.0269249	0.0165302		4.54833	4.10613	5.19665	1.78798	1.86043	LMX1A	-0.430342	0.56813	1.47787	-0.770561	-0.845094		0.664271	0.384101	1.07504	-1.08466	-1.03876
LRRFIP2	LRR binding FLII interacting protein 2 [Source:NCBI gene;Acc:420759]	7	4	3	3	52.0398	57.736	44.7398	69.5067	46.5407		82.8785	89.0724	85.3907	67.1909	73.2545	LRRFIP2	-0.207387	0.362531	-0.937763	1.5402	-0.757586		0.36661	1.05036	0.643939	-1.36513	-0.695776
MNT	MAX network transcriptional repressor [Source:NCBI gene;Acc:427840]	7	4	3	3	25.5455	32.7982	36.745	41.225	25.5598		22.9873	21.5161	23.384	21.2303	18.4851	MNT	-0.989102	0.0613397	0.632966	1.28182	-0.987021		0.75938	-0.00230537	0.964795	-0.15027	-1.5716
NFATC2	nuclear factor of activated T-cells 2 [Source:NCBI gene;Acc:419346]	7	4	3	3	1.62305	1.88683	9.42729	2.93986	9.5419		11.8691	12.5145	11.0403	7.10851	6.69778	NFATC2	-0.854996	-0.789826	1.07309	-0.529669	1.1014		0.738163	0.973654	0.435745	-0.998849	-1.14871
ZNF800	zinc finger protein 800 [Source:NCBI gene;Acc:417747]	7	4	3	3	3.38797	8.32369	1.93024	9.14804	2.21167		2.46303	2.48217	2.43707	2.07785	2.15463	ZNF800	-0.465204	0.958873	-0.885794	1.19672	-0.804597		0.732196	0.83223	0.596536	-1.28116	-0.879799
ZNF821	zinc finger protein 821 [Source:NCBI gene;Acc:415878]	7	4	3	3	31.6646	50.0176	55.761	44.8319	29.4229		38.8438	38.0358	36.8134	29.8979	34.058	ZNF821	-0.930819	0.669494	1.1703	0.21732	-1.12629		0.912192	0.689807	0.353317	-1.5502	-0.405116
BCL6	B-cell CLL/lymphoma 6 [Source:NCBI gene;Acc:424912]	8	5	3	3	42.244	20.1383	42.4575	24.9687	191.013		81.3926	80.465	86.4916	58.2212	71.111	BCL6	-0.30607	-0.614729	-0.30309	-0.547283	1.77117		0.524857	0.44172	0.981837	-1.55181	-0.396606
FOXO1	forkhead box O1 [Source:NCBI gene;Acc:374231]	8	5	3	3	8.75514	6.17026	19.1813	9.3366	42.0025		23.8645	27.407	26.3083	21.4703	23.8245	FOXO1	-0.563859	-0.738746	0.14155	-0.52452	1.68557		-0.304786	1.21502	0.743678	-1.33196	-0.32195
HBP1	HMG-box transcription factor 1 [Source:NCBI gene;Acc:417705]	8	5	3	3	37.6458	49.4846	71.1635	52.4934	126.023		95.7664	79.8533	98.8716	93.832	76.692	HBP1	-0.850834	-0.511867	0.108841	-0.42572	1.67958		0.674877	-0.913	0.984724	0.481855	-1.22846
IKZF2	IKAROS family zinc finger 2 [Source:NCBI gene;Acc:395309]	8	5	3	3	3.14727	72.2856	1.45115	57.0664	9.24082		0.899395	1.20423	1.02665	0.996245	0.425296	IKZF2	-0.761821	1.30444	-0.812511	0.849601	-0.57971		-0.037476	1.00402	0.397308	0.293425	-1.65728
MEF2D	myocyte enhancer factor 2D [Source:NCBI gene;Acc:431059]	8	5	3	3	22.9391	19.7717	48.0225	35.0797	60.5546		27.0324	26.2746	29.6345	24.1848	25.6008	MEF2D	-0.836656	-1.02153	0.627389	-0.128046	1.35885		0.241098	-0.134097	1.52944	-1.16874	-0.467698
MXI1	MAX interactor 1, dimerization protein [Source:NCBI gene;Acc:423888]	8	5	3	3	22.0962	25.5551	28.1351	21.3339	41.988		53.5539	46.8324	58.0544	43.6924	46.1398	MXI1	-0.68336	-0.270521	0.0374095	-0.774338	1.69081		0.655305	-0.474286	1.41165	-1.00198	-0.590686
STAT1	signal transducer and activator of transcription 1 [Source:NCBI gene;Acc:424044]	8	5	3	3	41.4304	60.8019	53.4616	60.0336	44.8574		56.7842	54.4547	55.6182	59.0911	46.0579	STAT1	-1.2202	0.991653	0.153523	0.903928	-0.828903		0.479568	0.0107557	0.244912	0.943799	-1.67904
ZHX2	zinc fingers and homeoboxes 2 [Source:NCBI gene;Acc:420351]	8	5	3	3	14.3801	23.1612	42.1157	26.1832	26.9464		23.6655	25.4581	24.0408	24.8276	22.654	ZHX2	-1.21443	-0.338693	1.55163	-0.0373114	0.038808		-0.429945	1.23216	-0.0819425	0.647544	-1.36781
ARNTL	aryl hydrocarbon receptor nuclear translocator like [Source:NCBI gene;Acc:374115]	9	6	3	3	24.8484	49.9486	30.8394	23.0707	31.0971		36.6752	42.1538	36.4788	41.7997	35.7553	ARNTL	-0.666736	1.68622	-0.105125	-0.833385	-0.0809707		-0.606392	1.14457	-0.669173	1.03139	-0.900389
TBX1	T-box 1 [Source:NCBI gene;Acc:771328]	10	7	3	3	9.13513	0.513386	19.1449	41.7477	40.5817		63.5668	61.3704	76.3441	59.436	68.0982	TBX1	-0.707193	-1.17301	-0.166388	1.05479	0.991796		-0.325997	-0.652003	1.57052	-0.939118	0.346595
ELF3	E74 like ETS transcription factor 3 [Source:NCBI gene;Acc:421177]	11	8	3	3	0.156376	11.3834	0.128761	3.12799	14.3063		2.77357	4.58324	2.67759	3.05057	4.58548	ELF3	-0.857122	0.841786	-0.861301	-0.40745	1.28409		-0.785263	1.08328	-0.884362	-0.49925	1.0856
CREB3L1	cAMP responsive element binding protein 3 like 1 [Source:NCBI gene;Acc:100859610]	1	3	-2	2	295.916	5.8046	107.396	9.27197	46.888		207.157	187.087	170.026	123.728	112.481	CREB3L1	1.6829	-0.723818	0.11897	-0.695053	-0.382997		1.1558	0.662886	0.24388	-0.893179	-1.16939
HIVEP3	human immunodeficiency virus type I enhancer binding protein 3 [Source:NCBI gene;Acc:428208]	1	3	-2	2	35.4701	8.71334	16.8775	9.05046	3.16647		6.57765	6.09517	6.20415	5.63292	5.04477	HIVEP3	1.64952	-0.470914	0.176086	-0.444198	-0.910495		1.13021	0.312317	0.497053	-0.471282	-1.4683
IRX6	iroquois homeobox 6 [Source:HGNC Symbol;Acc:HGNC:14675]	1	3	-2	2	205.505	5.22051	58.4252	0.787568	2.39662		17.7123	18.0427	13.3775	10.6938	8.70351	IRX6	1.71995	-0.560795	0.0450739	-0.611276	-0.592952		0.964162	1.04369	-0.0790539	-0.724911	-1.20389
PLAGL1	PLAG1 like zinc finger 1 [Source:NCBI gene;Acc:769676]	1	3	-2	2	27.6812	13.3386	17.3553	14.9909	11.3352		12.9153	12.7063	12.0853	9.76755	8.78789	PLAGL1	1.67885	-0.562945	0.0648754	-0.304691	-0.876084		0.893578	0.781281	0.447527	-0.797968	-1.32442
PREB	prolactin regulatory element binding [Source:NCBI gene;Acc:100858986]	1	3	-2	2	38.2664	32.5646	33.0632	34.2864	32.2428		39.69	40.0573	37.0367	38.0404	35.0885	PREB	1.69752	-0.617071	-0.414655	0.0818825	-0.747673		0.840841	1.02173	-0.46581	0.0284687	-1.42523
TWIST3	Twist homlog 3 [Source:NCBI gene;Acc:426886]	1	3	-2	2	578.587	0.677152	236.143	0.036024	8.44286		13.5177	15.7202	9.41401	6.90207	7.75392	TWIST3	1.63944	-0.650136	0.28274	-0.652677	-0.61937		0.750743	1.32971	-0.327933	-0.988216	-0.764301
CUX2	cut like homeobox 2 [Source:NCBI gene;Acc:416875]	2	4	-2	2	11.835	0.977163	7.9867	0.364615	0.346034		0.405492	0.460628	0.375313	0.318092	0.247057	CUX2	1.42026	-0.626835	0.694721	-0.742322	-0.745826		0.538352	1.21026	0.170573	-0.526757	-1.39243
HMX1	H6 family homeobox 1 [Source:NCBI gene;Acc:396546]	2	4	-2	2	19.0781	1.08192	15.6504	0.415699	4.28343		6.27813	4.58298	6.00758	4.37749	4.85954	HMX1	1.26658	-0.810066	0.871057	-0.886943	-0.44063		1.22347	-0.738684	0.910309	-0.976535	-0.418556
HSF5	#N/A	2	4	-2	2	3.11867	1.60507	0.527984	0.657656	0.231023		11.5655	15.3913	12.6929	5.12613	7.3893	HSF5	1.60849	0.320742	-0.595634	-0.48531	-0.848285		0.273857	1.19903	0.546487	-1.28333	-0.736043
SMAD3	SMAD family member 3 [Source:NCBI gene;Acc:395132]	2	4	-2	2	354.34	105.424	241.378	108.737	58.4848		56.0349	60.5614	57.4068	49.6561	43.6233	SMAD3	1.48298	-0.560211	0.555747	-0.533017	-0.9455		0.380306	1.04794	0.58265	-0.560545	-1.45035
TWIST2	twist family bHLH transcription factor 2 [Source:NCBI gene;Acc:395405]	2	4	-2	2	1048.64	1.8499	610.352	0.0660632	59.4114		112.781	122.725	112.661	104.309	97.4432	TWIST2	1.49892	-0.728029	0.566507	-0.731824	-0.605572		0.292132	1.3305	0.279583	-0.592602	-1.30961
AFF2	AF4/FMR2 family member 2 [Source:NCBI gene;Acc:422394]	3	5	-2	2	40.1608	5.89747	33.7752	16.6018	10.0342		12.1758	13.008	13.7558	11.9134	11.2339	AFF2	1.25948	-1.0278	0.833205	-0.313227	-0.751654		-0.24611	0.601805	1.36365	-0.513512	-1.20583
GABPB1	GA binding protein transcription factor beta subunit 1 [Source:NCBI gene;Acc:415453]	3	5	-2	2	54.6361	38.1363	47.2402	49.641	24.4419		43.0988	42.9439	45.534	42.0706	40.2498	GABPB1	0.993956	-0.393882	0.371874	0.573808	-1.54576		0.167057	0.086024	1.44093	-0.370776	-1.32323
HOXB8	homeobox B8 [Source:NCBI gene;Acc:395737]	3	5	-2	2	7.29421	2.28328	9.28042	2.66371	2.82086		3.40324	2.76702	3.49898	3.33798	2.41547	HOXB8	0.756868	-0.806637	1.3766	-0.687934	-0.638901		0.677155	-0.674643	0.880586	0.538491	-1.42159
NR5A2	nuclear receptor subfamily 5 group A member 2 [Source:NCBI gene;Acc:395961]	3	5	-2	2	4.16357	0.418485	4.80105	0.967806	0.943732		3.57614	5.80192	4.46265	2.07143	2.35819	NR5A2	0.927329	-0.896073	1.23771	-0.62862	-0.640341		-0.0506802	1.39686	0.525867	-1.02927	-0.842775
ZBTB2	zinc finger and BTB domain containing 2 [Source:NCBI gene;Acc:421635]	3	5	-2	2	56.719	41.8535	43.9515	44.7542	30.8973		39.2403	42.7136	35.9347	38.7884	39.6952	ZBTB2	1.42341	-0.193821	0.034418	0.12175	-1.38576		-0.0141166	1.42203	-1.38093	-0.200977	0.173995
ZBTB44	zinc finger and BTB domain containing 44 [Source:NCBI gene;Acc:101751641]	3	5	-2	2	70.0185	56.9312	63.1143	55.8226	34.5863		43.4991	41.3538	46.5218	41.912	38.6572	ZBTB44	1.04767	0.0629515	0.528181	-0.0204671	-1.61834		0.383469	-0.357445	1.42735	-0.164669	-1.2887
ZNFX1	zinc finger NFX1-type containing 1 [Source:NCBI gene;Acc:419218]	3	5	-2	2	6.30915	2.95186	5.93849	3.89195	5.08127		10.5444	10.1364	11.0965	10.4292	8.6805	ZNFX1	1.05015	-1.34076	0.786179	-0.671273	0.175706		0.404965	-0.0452591	1.01417	0.27786	-1.65173
AHR2	aryl hydrocarbon receptor 2 [Source:NCBI gene;Acc:424033]	4	6	-2	2	0.377341	0.129935	0.621923	0.187073	0.134904		2.04882	2.02828	2.68303	2.42019	1.76444	AHR2	0.41284	-0.759746	1.57204	-0.488938	-0.736195		-0.387458	-0.444232	1.36608	0.639335	-1.17372
GABPA	GA binding protein transcription factor alpha subunit [Source:NCBI gene;Acc:418478]	4	6	-2	2	96.3864	66.4801	95.2978	87.4354	54.1081		90.5814	87.4018	95.2355	93.9699	87.2147	GABPA	0.875588	-0.716741	0.817622	0.399002	-1.37547		-0.0813354	-0.945603	1.18371	0.839695	-0.99647
ZNF711	zinc finger protein 711 [Source:NCBI gene;Acc:422269]	4	6	-2	2	62.3376	43.2488	70.377	46.3474	23.4509		40.7708	42.8984	43.4391	42.4239	39.9166	ZNF711	0.723739	-0.324044	1.16502	-0.153965	-1.41075		-0.752297	0.678175	1.04169	0.359109	-1.32667
ADNP2	ADNP homeobox 2 [Source:NCBI gene;Acc:420805]	5	7	-2	2	33.3916	41.7469	27.2636	32.9232	19.5082		25.9957	26.5841	28.6825	28.7111	26.2614	ADNP2	0.294644	1.30987	-0.44995	0.23773	-1.39229		-0.933886	-0.494703	1.07139	1.09278	-0.735582
GTF3A	general transcription factor IIIA [Source:NCBI gene;Acc:418931]	5	7	-2	2	65.2865	73.2086	60.9501	75.3693	38.6847		53.5052	54.1918	51.4022	55.8705	51.0928	GTF3A	0.176671	0.717769	-0.11951	0.865343	-1.64027		0.146889	0.491523	-0.908575	1.334	-1.06384
HAND2	heart and neural crest derivatives expressed 2 [Source:NCBI gene;Acc:395813]	5	7	-2	2	1.93838	0.143175	18.8497	0.0536837	1.87842		6.85697	12.2682	9.25577	10.74	8.6697	HAND2	-0.327961	-0.551458	1.77744	-0.562599	-0.335426		-1.31342	1.31774	-0.147019	0.574682	-0.43199
SATB2	SATB homeobox 2 [Source:NCBI gene;Acc:424063]	5	7	-2	2	8.26619	1.68235	84.3906	6.09158	4.05436		2.3406	2.58715	3.39815	3.03847	2.43861	SATB2	-0.355022	-0.540078	1.78465	-0.416145	-0.473407		-0.942778	-0.389327	1.43113	0.623741	-0.722769
SCX	scleraxis bHLH transcription factor [Source:NCBI gene;Acc:374101]	5	7	-2	2	0.860046	0.0711236	0.733059	0	0.871577		5.90364	15.8464	12.6818	6.45956	11.4041	SCX	0.811875	-1.00318	0.519719	-1.16681	0.838404		-1.07669	1.27329	0.52535	-0.945297	0.223344
ZNF318	zinc finger protein 318 [Source:NCBI gene;Acc:421457]	5	7	-2	2	30.9233	30.6435	37.6434	29.6736	22.8718		22.3486	21.5206	23.0268	21.4817	22.9544	ZNF318	0.109113	0.0557565	1.39065	-0.129198	-1.42632		0.110019	-0.998826	1.01831	-1.05088	0.921377
CARF	calcium responsive transcription factor [Source:NCBI gene;Acc:424090]	6	8	-2	2	5.50915	8.54047	6.58249	7.21398	3.33852		3.10227	2.50866	2.51055	2.29533	3.23315	CARF	-0.371987	1.17741	0.17663	0.499403	-1.48146		0.904344	-0.537673	-0.533067	-1.05589	1.22229
HOXC9	homeobox C9 [Source:NCBI gene;Acc:425723]	6	8	-2	2	44.3272	63.3986	65.9101	47.2748	12.2729		8.59867	6.29368	7.40137	9.56685	7.12465	HOXC9	-0.107708	0.781731	0.89886	0.0297585	-1.60264		0.622014	-1.16652	-0.307024	1.37327	-0.521737
IRF7	interferon regulatory factor 7 [Source:NCBI gene;Acc:396330]	6	8	-2	2	3.70622	5.07779	5.17624	7.27479	2.22632		7.5628	9.22165	6.134	10.4318	7.31139	IRF7	-0.525093	0.205294	0.257721	1.37525	-1.31317		-0.336391	0.643395	-1.1803	1.35818	-0.484887
NR2C1	nuclear receptor subfamily 2, group C, member 1 [Source:NCBI gene;Acc:373913]	6	8	-2	2	27.9848	33.1523	28.5631	37.1325	16.3673		20.9152	22.8593	24.2857	26.9137	20.2573	NR2C1	-0.0839705	0.578294	-0.0098567	1.08838	-1.57285		-0.793539	-0.0696034	0.461529	1.44012	-1.03851
PAX3	paired box 3 [Source:NCBI gene;Acc:374127]	6	8	-2	2	7.28419	16.4342	1.8065	7.04137	0.541072		0.51877	0.408445	0.895279	1.95982	0.461129	PAX3	0.105761	1.56598	-0.768404	0.0670097	-0.970349		-0.50762	-0.677368	0.0716851	1.70961	-0.596308
TULP4	tubby like protein 4 [Source:NCBI gene;Acc:421658]	6	8	-2	2	36.589	57.9722	46.9198	50.3815	13.9438		8.80843	8.42423	9.3143	9.1143	9.37346	TULP4	-0.268206	0.986118	0.337792	0.540857	-1.59656		-0.504524	-1.48094	0.781136	0.272834	0.93149
ARID1B	AT-rich interaction domain 1B [Source:NCBI gene;Acc:421650]	7	9	-2	2	77.1351	132.566	93.5554	182.689	70.5383		37.9857	37.3057	40.793	45.624	41.0168	ARID1B	-0.732829	0.456265	-0.380585	1.53149	-0.874343		-0.779472	-0.986579	0.0755302	1.54685	0.143672
CEBPZ	CCAAT/enhancer binding protein zeta [Source:NCBI gene;Acc:421474]	7	9	-2	2	50.4817	60.1441	42.7778	61.799	43.1196		28.6331	28.2736	27.8014	30.203	31.7321	CEBPZ	-0.130609	0.936421	-0.981366	1.11918	-0.943622		-0.429888	-0.652111	-0.94396	0.540416	1.48554
E2F4	E2F transcription factor 4 [Source:NCBI gene;Acc:769430]	7	9	-2	2	30.9903	41.7608	34.0667	40.3875	26.5958		26.1587	28.2994	26.3512	29.9942	28.8108	E2F4	-0.592338	1.09995	-0.108964	0.884171	-1.28282		-1.07349	0.229113	-0.956333	1.26041	0.540299
HOXA2	homeobox A2 [Source:NCBI gene;Acc:396055]	7	9	-2	2	13.1628	137.062	29.6956	53.6067	14.4857		11.4427	11.9128	12.6891	14.0654	11.5602	HOXA2	-0.707117	1.69716	-0.386297	0.0776997	-0.681446		-0.822774	-0.388804	0.327743	1.59818	-0.714343
POU6F2	#N/A	7	9	-2	2	0.441622	0.535473	0.150673	3.22053	0.281029		0.00727707	0.0232812	0.0754102	0.0622747	0.11297	POU6F2	-0.375024	-0.302341	-0.600351	1.77711	-0.499396		-1.16175	-0.782038	0.454769	0.143117	1.3459
PRDM15	PR/SET domain 15 [Source:NCBI gene;Acc:418531]	7	9	-2	2	11.201	16.3502	15.709	20.0873	10.7186		7.16597	8.78147	7.77857	9.19703	9.84733	PRDM15	-0.926553	0.394237	0.229777	1.35283	-1.05029		-1.28524	0.210545	-0.718041	0.595311	1.19743
TOX3	TOX high mobility group box family member 3 [Source:NCBI gene;Acc:415724]	7	9	-2	2	1.7303	8.5741	2.04003	3.06195	0.605849		0.523268	0.612989	1.02663	0.869301	0.82577	TOX3	-0.470649	1.71733	-0.371628	-0.044917	-0.830139		-1.22509	-0.782457	1.25822	0.482044	0.267288
ZFPM1	zinc finger protein, FOG family member 1 [Source:NCBI gene;Acc:415835]	7	9	-2	2	12.2405	24.1622	10.4985	34.6526	16.0891		7.31711	7.47586	7.00337	7.44856	7.98842	ZFPM1	-0.731837	0.465284	-0.906761	1.51869	-0.345377		-0.363672	0.0819545	-1.24434	0.00532459	1.52073
ARID5B	AT-rich interaction domain 5B [Source:NCBI gene;Acc:423661]	8	10	-2	2	22.3707	46.448	131.678	145.765	84.3237		27.5195	30.548	32.0391	34.5162	33.1092	ARID5B	-1.20073	-0.747206	0.858183	1.12353	-0.0337813		-1.50288	-0.372627	0.183874	1.10837	0.583267
BHLHE40	basic helix-loop-helix family member e40 [Source:NCBI gene;Acc:416108]	8	10	-2	2	6.19747	5.76646	3.10797	4.78922	166.293		33.0518	33.3405	32.7212	41.4206	64.2772	BHLHE40	-0.430077	-0.43605	-0.472893	-0.449593	1.78861		-0.58461	-0.563268	-0.60904	0.0338735	1.72304
CBFB	core-binding factor beta subunit [Source:NCBI gene;Acc:395257]	8	10	-2	2	141.734	69.9168	179.68	134.97	424.798		73.7434	85.1928	84.4177	140.913	151.258	CBFB	-0.354055	-0.878485	-0.0769637	-0.40345	1.71295		-0.925256	-0.607716	-0.629212	0.937644	1.22454
DLX4	#N/A	8	10	-2	2	0	1.71028	0.130928	22.2503	300.898		5.62564	11.0167	16.1058	32.7096	50.3878	DLX4	-0.49164	-0.478704	-0.49065	-0.32334	1.78433		-0.959497	-0.664648	-0.386308	0.521794	1.48866
FOXK2	forkhead box K2 [Source:NCBI gene;Acc:107049008]	8	10	-2	2	0	0	0	0.065997	1.96593		0	0.241816	0.165354	2.53191	3.3183	FOXK2	-0.465889	-0.465889	-0.465889	-0.390228	1.78789		-0.804623	-0.64915	-0.698311	0.823242	1.32884
GRHL2	#N/A	8	10	-2	2	1.84684	66.9013	0.699362	128.428	36.0337		16.4773	16.8988	21.1249	20.8592	25.9599	GRHL2	-0.844337	0.378046	-0.865898	1.53415	-0.20196		-0.984287	-0.874734	0.223774	0.154702	1.48054
HES4	hes family bHLH transcription factor 4 [Source:NCBI gene;Acc:395128]	8	10	-2	2	129.392	160.233	261.806	259.54	173.139		40.4558	49.9611	52.7695	76.1921	79.4578	HES4	-1.116	-0.605568	1.07551	1.03802	-0.391961		-1.12648	-0.572015	-0.408196	0.958098	1.14859
HOXA1	homeobox A1 [Source:NCBI gene;Acc:374051]	8	10	-2	2	2.63912	64.3477	2.11471	20.2277	8.23823		1.17451	1.32402	1.36419	2.29746	2.52917	HOXA1	-0.646484	1.71767	-0.666574	0.0273619	-0.431973		-0.899915	-0.661084	-0.596921	0.893895	1.26402
LBX2	ladybird homeobox 2 [Source:NCBI gene;Acc:431414]	8	10	-2	2	2.99471	0	2.59592	0	16.2813		2.86958	3.21945	6.14543	13.1411	13.1068	LBX2	-0.20281	-0.643029	-0.261432	-0.643029	1.7503		-0.943624	-0.875226	-0.303219	1.06438	1.05768
MAF	MAF bZIP transcription factor [Source:NCBI gene;Acc:693248]	8	10	-2	2	4.21832	2.14101	17.8579	17.484	74.7316		12.4103	14.6587	18.2842	23.9833	26.9833	MAF	-0.642748	-0.71277	-0.182989	-0.195591	1.7341		-1.11548	-0.749534	-0.159465	0.768107	1.25638
MSX2	msh homeobox 2 [Source:NCBI gene;Acc:395245]	8	10	-2	2	0.370808	20.9848	1.20754	91.4185	1021.05		25.9466	32.731	51.5408	164.42	211.747	MSX2	-0.508785	-0.462508	-0.506907	-0.304388	1.78259		-0.838348	-0.758611	-0.537539	0.789136	1.34536
MYB	MYB proto-oncogene, transcription factor [Source:NCBI gene;Acc:396244]	8	10	-2	2	10.8541	14.4862	7.58459	49.2594	24.2456		6.59183	6.47784	9.33239	10.384	11.0554	MYB	-0.619545	-0.403838	-0.813723	1.66134	0.175769		-1.02195	-1.07548	0.264871	0.758666	1.07389
NFKB1	nuclear factor kappa B subunit 1 [Source:NCBI gene;Acc:396033]	8	10	-2	2	13.1066	64.6428	13.1594	64.8196	30.1796		36.7464	37.3588	37.721	47.371	43.673	NFKB1	-0.922612	1.05238	-0.920588	1.05915	-0.268331		-0.811767	-0.681899	-0.605084	1.44151	0.657235
NR0B1	nuclear receptor subfamily 0 group B member 1 [Source:NCBI gene;Acc:395285]	8	10	-2	2	1.48876	0.664449	1.66982	1.82278	3.19703		1.06803	1.63937	1.42839	2.00215	2.88989	NR0B1	-0.305728	-1.20639	-0.107894	0.059233	1.56077		-1.06227	-0.239374	-0.543233	0.28314	1.56173
OTX1	orthodenticle homeobox 1 [Source:NCBI gene;Acc:100858585]	8	10	-2	2	0.0702166	0.841312	0.791898	0.765789	0.194613		2.30762	2.91169	2.75217	5.26864	4.19732	OTX1	-1.25317	0.835936	0.702059	0.631321	-0.916147		-0.968154	-0.472479	-0.603375	1.46155	0.582462
PRDM2	PR/SET domain 2 [Source:HGNC Symbol;Acc:HGNC:9347]	8	10	-2	2	50.649	75.5743	84.1983	73.281	65.8378		28.8031	29.2285	30.3999	31.0365	33.8593	PRDM2	-1.52834	0.449653	1.13402	0.267664	-0.323		-0.932883	-0.71979	-0.132996	0.185856	1.59981
RLF	rearranged L-myc fusion [Source:NCBI gene;Acc:419573]	8	10	-2	2	20.9373	30.0936	26.0005	31.9653	24.481		14.5904	14.2467	14.4634	15.915	16.4227	RLF	-1.30515	0.770195	-0.157527	1.19442	-0.501938		-0.550964	-0.903487	-0.681204	0.807446	1.32821
RUNX1	runt-related transcription factor 1 [Source:NCBI gene;Acc:396152]	8	10	-2	2	21.0685	1.24257	16.9583	19.9145	50.2498		3.97554	4.75701	6.89856	11.5568	12.3541	RUNX1	-0.0461112	-1.1634	-0.27774	-0.111145	1.5984		-1.01977	-0.817142	-0.261849	0.946012	1.15275
SATB1	SATB homeobox 1 [Source:NCBI gene;Acc:420647]	8	10	-2	2	20.6265	105.999	11.4998	143.804	81.1688		7.49109	6.52714	7.2151	12.965	15.5446	SATB1	-0.92297	0.592549	-1.08498	1.26364	0.151762		-0.606689	-0.844662	-0.674822	0.744666	1.38151
SOX9	SRY (sex determining region Y)-box 9 [Source:NCBI gene;Acc:374148]	8	10	-2	2	1.71075	57.4609	2.1666	74.6336	40.947		7.10264	9.14136	10.822	9.21656	9.25451	SOX9	-1.02748	0.673648	-1.01357	1.19765	0.169751		-1.51616	0.0256742	1.29669	0.0825449	0.111245
TCF7	transcription factor 7 (T-cell specific, HMG-box) [Source:NCBI gene;Acc:395229]	8	10	-2	2	9.89888	1.68895	62.4269	6.42095	275.313		2.6649	6.25918	18.255	59.4048	73.0168	TCF7	-0.524619	-0.594938	-0.0747124	-0.554408	1.74868		-0.908759	-0.79711	-0.424481	0.85376	1.27659
TFAP2A	transcription factor AP-2 alpha [Source:NCBI gene;Acc:395982]	8	10	-2	2	8.65629	314.808	35.2516	304.321	99.9478		37.1978	42.5739	51.3915	66.0485	65.8109	TFAP2A	-0.978298	1.10247	-0.797542	1.0312	-0.357832		-1.16916	-0.761182	-0.0920492	1.02021	1.00218
TFCP2L1	transcription factor CP2 like 1 [Source:NCBI gene;Acc:424238]	8	10	-2	2	3.54081	4.09788	3.40162	8.13786	80.0724		38.7793	49.5328	85.1786	109.866	124.645	TFCP2L1	-0.483646	-0.467126	-0.487774	-0.347322	1.78587		-1.15202	-0.862718	0.0962669	0.760442	1.15803
THRB	thyroid hormone receptor beta [Source:NCBI gene;Acc:396431]	8	10	-2	2	0.808742	13.9665	5.5718	36.1803	9.85464		14.9476	15.7436	17.2355	21.5875	19.9004	THRB	-0.909554	0.0503476	-0.562074	1.67091	-0.249628		-1.04755	-0.76349	-0.231062	1.32209	0.720012
TP63	tumor protein p63 [Source:NCBI gene;Acc:374269]	8	10	-2	2	8.41963	323.44	5.41316	275.776	132.922		61.9628	60.6324	67.9051	74.5167	75.7042	TP63	-0.953774	1.18055	-0.974143	0.857618	-0.110249		-0.891152	-1.08296	-0.0344737	0.918691	1.08989
TUB	tubby bipartite transcription factor [Source:NCBI gene;Acc:423061]	8	10	-2	2	48.4864	317.781	38.3133	91.508	51.3601		46.8187	48.4913	50.4776	51.7819	54.2929	TUB	-0.516148	1.76235	-0.602223	-0.152143	-0.491834		-1.22735	-0.649691	0.0363009	0.486753	1.35398
ZBTB25	zinc finger and BTB domain containing 25 [Source:NCBI gene;Acc:423505]	8	10	-2	2	11.9233	12.7403	14.7188	10.534	12.3641		7.19503	8.03971	8.10112	9.58822	8.55012	ZBTB25	-0.351558	0.187526	1.493	-1.26827	-0.0606899		-1.25946	-0.292166	-0.221837	1.48113	0.292333
ZHX3	zinc fingers and homeoboxes 3 [Source:NCBI gene;Acc:419176]	8	10	-2	2	12.4579	9.72163	13.6527	11.2307	31.6153		12.0916	13.6853	15.7263	13.7078	15.6189	ZHX3	-0.364355	-0.668526	-0.231543	-0.500776	1.7652		-1.36119	-0.315416	1.0239	-0.300663	0.953366
EGR1	early growth response 1 [Source:NCBI gene;Acc:373931]	9	11	-2	2	45.3916	246.644	153.178	230.927	168.263		138.292	118.4	116.616	125.881	213.781	EGR1	-1.54988	0.975993	-0.197077	0.778722	-0.00775726		-0.105705	-0.594456	-0.638305	-0.410644	1.74911
MXD1	MAX dimerization protein 1 [Source:NCBI gene;Acc:426299]	9	11	-2	2	22.3835	27.7652	24.5962	21.3705	55.7611		26.5996	33.23	32.6989	33.301	32.3974	MXD1	-0.554929	-0.18124	-0.401286	-0.625273	1.76273		-1.77325	0.556891	0.370226	0.581854	0.264278
SREBF1	sterol regulatory element binding transcription factor 1 [Source:NCBI gene;Acc:373915]	9	11	-2	2	28.5671	37.5312	25.7958	53.4284	98.6718		60.7929	61.6853	59.1118	56.7558	68.0451	SREBF1	-0.676825	-0.376944	-0.769535	0.154876	1.66843		-0.114902	0.0964072	-0.51299	-1.07088	1.60236
TF	transferrin (ovotransferrin) [Source:NCBI gene;Acc:396241]	4	2	2	2	5.62318	2.58473	6.00892	2.03394	5.23886		34.6522	26.2816	22.179	28.3919	24.3851	TF	0.717933	-0.928094	0.926901	-1.22647	0.509735		1.56762	-0.188006	-1.04847	0.25461	-0.585754
ZBTB47	zinc finger and BTB domain containing 47 [Source:NCBI gene;Acc:428398]	4	2	2	2	26.7155	11.4264	43.6783	9.89033	17.8907		94.5377	80.2652	69.6355	64.2586	62.3495	ZBTB47	0.346182	-0.75758	1.57078	-0.868476	-0.290907		1.52528	0.454383	-0.343179	-0.746619	-0.889862
DNAJC1	DnaJ heat shock protein family (Hsp40) member C1 [Source:NCBI gene;Acc:420508]	5	3	2	2	38.9539	31.4887	61.3923	40.4728	28.3816		57.8861	55.8006	56.225	45.8792	43.2881	DNAJC1	-0.091737	-0.670152	1.64684	0.0259488	-0.910898		0.904568	0.593799	0.657047	-0.884649	-1.27077
ETV1	ETS variant 1 [Source:NCBI gene;Acc:395748]	5	3	2	2	54.6531	41.5144	73.4675	47.3048	9.58064		26.5597	23.0046	25.4217	22.366	18.7475	ETV1	0.400917	-0.162514	1.20774	0.0857961	-1.53194		1.1014	-0.0710079	0.726117	-0.281603	-1.4749
HLF	HLF, PAR bZIP transcription factor [Source:NCBI gene;Acc:417395]	5	3	2	2	24.8434	14.9581	61.2403	20.5811	33.6828		145.482	138.752	140.701	123.698	103.466	HLF	-0.34157	-0.884617	1.65789	-0.575719	0.144019		0.879308	0.486433	0.600195	-0.392412	-1.57352
IRF2	interferon regulatory factor 2 [Source:NCBI gene;Acc:396115]	5	3	2	2	32.0584	32.0635	35.558	21.629	27.1241		53.2751	47.7336	49.7329	42.5753	38.4988	IRF2	0.438099	0.439042	1.08451	-1.48832	-0.473329		1.18018	0.233999	0.575367	-0.646751	-1.34279
OSR2	odd-skipped related transciption factor 2 [Source:NCBI gene;Acc:771523]	5	3	2	2	23.8982	0.125067	155.995	0.20565	6.82605		59.5194	50.5493	35.5741	25.8926	21.8736	OSR2	-0.201676	-0.556512	1.76999	-0.555309	-0.456494		1.29806	0.739274	-0.193589	-0.796692	-1.04705
PBX3	PBX homeobox 3 [Source:NCBI gene;Acc:417093]	5	3	2	2	38.2062	19.3404	41.3124	37.1561	16.4584		26.8166	25.2471	23.5143	24.7262	22.3694	PBX3	0.662293	-0.957973	0.929062	0.572104	-1.20549		1.34687	0.420505	-0.602328	0.113048	-1.2781
SOX12	#N/A	5	3	2	2	0.587313	0.291343	3.52308	0.673648	0.65021		0.470429	0.419452	0.45816	0.336891	0.314738	SOX12	-0.416865	-0.638053	1.77712	-0.352345	-0.36986		0.997604	0.276211	0.823991	-0.892154	-1.20565
SOX8	SRY-box 8 [Source:NCBI gene;Acc:395483]	5	3	2	2	3.08068	0.307203	15.1403	2.64888	2.47767		10.5002	10.4053	7.9041	5.80275	4.52112	SOX8	-0.278885	-0.74759	1.75913	-0.351858	-0.380792		0.995915	0.960546	0.0288387	-0.753937	-1.23136
SRF	serum response factor [Source:NCBI gene;Acc:396103]	5	3	2	2	65.1964	51.8733	98.0456	70.902	51.4074		90.3913	100.321	67.6968	66.5488	74.5048	SRF	-0.120074	-0.819096	1.60342	0.179283	-0.843537		0.706476	1.37466	-0.82067	-0.897917	-0.36255
TFAM	transcription factor A, mitochondrial [Source:NCBI gene;Acc:373888]	5	3	2	2	125.295	132.965	101.272	138.138	62.5857		91.8924	85.4308	81.0851	89.8809	86.1401	TFAM	0.42653	0.673578	-0.347155	0.840154	-1.59311		1.19375	-0.34693	-1.38312	0.714127	-0.177827
VEZF1	vascular endothelial zinc finger 1 [Source:NCBI gene;Acc:417664]	5	3	2	2	101.975	102.604	120.495	75.897	29.332		52.781	53.2448	47.6665	40.9932	38.8341	VEZF1	0.448605	0.46634	0.970635	-0.286496	-1.59908		0.918278	0.98836	0.145449	-0.862918	-1.18917
YBX1	Y-box binding protein 1 [Source:NCBI gene;Acc:386575]	5	3	2	2	2671.87	3397.99	2318.55	2526.64	1090.16		1947.59	1810.47	1799.26	1665.17	1495.23	YBX1	0.323227	1.18983	-0.0984574	0.149898	-1.5645		1.19297	0.391302	0.325739	-0.458249	-1.45176
ZNF414	zinc finger protein 414 [Source:NCBI gene;Acc:425820]	5	3	2	2	31.0733	28.7339	45.9219	24.8094	16.7261		10.9434	9.66232	10.3026	9.06007	8.76976	ZNF414	0.151446	-0.0671979	1.53925	-0.434004	-1.18949		1.34237	-0.0957788	0.622986	-0.771838	-1.09774
ZNF704	zinc finger protein 704 [Source:NCBI gene;Acc:420194]	5	3	2	2	13.5983	14.4389	11.4917	20.9478	5.87477		30.7827	28.7488	26.9909	22.0647	22.0357	ZNF704	0.0603222	0.214914	-0.327089	1.4119	-1.36005		1.17807	0.663697	0.219112	-1.02677	-1.03411
BZFP1	B-locus zinc finger protein 1 [Source:NCBI gene;Acc:396247]	6	4	2	2	15.3582	17.8061	19.2958	18.185	9.85563		12.26	12.5575	11.9998	12.2608	11.1668	BZFP1	-0.196533	0.451865	0.846462	0.552217	-1.65401		0.397236	0.957284	-0.0925826	0.398836	-1.66077
DACH2	dachshund family transcription factor 2 [Source:NCBI gene;Acc:395576]	6	4	2	2	8.08037	23.1993	8.38354	12.2382	1.92075		4.0507	4.64518	4.13069	2.55539	3.36771	DACH2	-0.340958	1.57961	-0.302447	0.187217	-1.12342		0.37234	1.1083	0.471374	-1.47883	-0.473191
HHEX	hematopoietically expressed homeobox [Source:NCBI gene;Acc:396182]	6	4	2	2	15.0119	0.164425	14.4657	0.21057	23.2675		30.4241	35.2832	25.2022	27.6429	23.7086	HHEX	0.432499	-1.03097	0.378661	-1.02642	1.24624		0.429615	1.48825	-0.708064	-0.176317	-1.03349
HOXA5	homeobox A5 [Source:NCBI gene;Acc:100858404]	6	4	2	2	46.2496	88.67	54.3193	52.5958	14.5603		25.9058	26.0713	28.4398	22.3376	22.6159	HOXA5	-0.190687	1.41765	0.11527	0.049925	-1.39216		0.322853	0.38711	1.30652	-1.06226	-0.954214
IKZF4	#N/A	6	4	2	2	10.4079	11.6069	15.6377	10.9734	10.5828		9.61814	10.3152	8.9976	9.31585	8.993	IKZF4	-0.660329	-0.108161	1.74819	-0.399896	-0.579807		0.309626	1.5779	-0.819387	-0.240364	-0.827771
RFX2	regulatory factor X2 [Source:NCBI gene;Acc:420092]	6	4	2	2	6.07732	3.81808	8.14808	7.39236	3.45736		19.158	17.3203	15.324	6.9407	12.3264	RFX2	0.142632	-0.936264	1.13153	0.770633	-1.10853		1.0321	0.64849	0.231736	-1.51831	-0.394017
RXRG	retinoid X receptor gamma [Source:NCBI gene;Acc:396231]	6	4	2	2	5.47212	10.1014	4.45103	18.8711	1.32626		16.3717	16.6454	12.9405	15.6547	10.1121	RXRG	-0.377101	0.30156	-0.526796	1.58724	-0.984898		0.728005	0.826303	-0.504429	0.470465	-1.52034
SETDB1	SET domain bifurcated 1 [Source:NCBI gene;Acc:100859816]	6	4	2	2	43.2796	60.4077	46.7857	52.2604	33.9894		27.5288	26.9921	26.3673	27.4577	24.4365	SETDB1	-0.411666	1.32294	-0.056599	0.497839	-1.35252		0.764091	0.34231	-0.148685	0.708212	-1.66593
VDR	vitamin D (1,25- dihydroxyvitamin D3) receptor [Source:NCBI gene;Acc:395988]	6	4	2	2	2.86023	3.96648	1.54707	3.07704	1.44493		6.78679	8.06502	6.24028	5.59562	5.61512	VDR	0.262012	1.29324	-0.962082	0.464126	-1.05729		0.318659	1.56726	-0.215178	-0.84489	-0.825847
ASCL4	#N/A	7	5	2	2	0.34848	4.32037	0.135329	9.74366	0.113211		0.060614	0.0804659	0.0466733	0.027851	0.0740377	ASCL4	-0.61427	0.330029	-0.664946	1.61939	-0.670204		0.126392	1.06067	-0.529687	-1.41551	0.758139
CREB5	cAMP responsive element binding protein 5 [Source:NCBI gene;Acc:428435]	7	5	2	2	8.0383	31.1511	18.2402	18.9423	8.11719		9.51221	11.1222	10.9344	4.08819	6.5831	CREB5	-0.927802	1.49266	0.14058	0.214107	-0.919541		0.350133	0.879835	0.81805	-1.43444	-0.613581
CREM	cAMP responsive element modulator [Source:NCBI gene;Acc:378903]	7	5	2	2	6.21734	3.70639	9.40513	5.79748	14.2418		40.9403	41.4315	50.5523	30.6356	34.2574	CREM	-0.403737	-1.0158	0.373316	-0.506081	1.55231		0.180017	0.244238	1.43673	-1.16726	-0.693725
NFKB2	nuclear factor kappa B subunit 2 [Source:NCBI gene;Acc:386574]	7	5	2	2	15.8366	27.3605	17.2522	23.7435	11.9943		20.2485	23.6666	20.0859	19.3378	18.6115	NFKB2	-0.547631	1.30805	-0.319683	0.725615	-1.16635		-0.0727977	1.68534	-0.156468	-0.541252	-0.914821
SOX5	SRY-box 5 [Source:NCBI gene;Acc:418195]	7	5	2	2	6.36649	17.8715	5.08633	14.6538	2.25719		2.21183	2.7028	2.63294	2.09688	1.73691	SOX5	-0.431717	1.29256	-0.623578	0.810324	-1.04759		-0.161568	1.06934	0.894205	-0.449739	-1.35224
ZNF516	zinc finger protein 516 [Source:NCBI gene;Acc:421009]	7	5	2	2	40.9867	59.6014	75.9559	61.5987	49.9347		16.0355	16.2089	16.1297	15.7091	15.9014	ZNF516	-1.26454	0.151022	1.39471	0.302903	-0.584091		0.1954	1.07329	0.672396	-1.45729	-0.483799
ARID3B	AT-rich interaction domain 3B [Source:NCBI gene;Acc:100859297]	8	6	2	2	25.7045	91.2211	21.5916	58.8112	30.7279		12.0699	14.4961	12.4845	12.2225	12.7349	ARID3B	-0.677904	1.5532	-0.817968	0.449511	-0.506838		-0.746108	1.72786	-0.323359	-0.590448	-0.0679498
BLZF1	basic leucine zipper nuclear factor 1 [Source:NCBI gene;Acc:418371]	8	6	2	2	42.273	37.5978	34.4692	33.2366	54.3821		48.4852	48.1969	46.0551	43.8658	49.6592	BLZF1	0.219677	-0.326248	-0.691588	-0.835522	1.63368		0.536633	0.411169	-0.521242	-1.47429	1.04773
FOXN2	forkhead box N2 [Source:NCBI gene;Acc:421288]	8	6	2	2	18.2856	15.2605	21.9871	19.2815	25.2681		17.3904	18.4571	16.023	17.0748	18.3784	FOXN2	-0.45608	-1.25313	0.519207	-0.193676	1.38368		-0.0738671	0.985527	-1.4318	-0.38721	0.907353
HINFP	histone H4 transcription factor [Source:NCBI gene;Acc:419756]	8	6	2	2	12.7817	16.0027	11.9765	17.3821	14.294		11.7535	12.4295	10.6144	12.3572	10.7625	HINFP	-0.764211	0.678889	-1.12497	1.29693	-0.0866374		0.197873	0.984157	-1.12717	0.900003	-0.95486
NFATC1	nuclear factor of activated T-cells 1 [Source:NCBI gene;Acc:420815]	8	6	2	2	10.5223	7.37841	5.23842	5.64805	26.4364		26.5293	42.2816	32.8996	23.4337	27.7117	NFATC1	-0.0590182	-0.414161	-0.655904	-0.609631	1.73871		-0.54749	1.58621	0.315394	-0.966794	-0.387323
PURA	purine rich element binding protein A [Source:NCBI gene;Acc:430546]	8	6	2	2	19.7163	18.7003	22.169	22.8866	42.0823		28.3721	29.6542	29.3213	29.8118	26.994	PURA	-0.559523	-0.664904	-0.305129	-0.230702	1.76026		-0.392319	0.704538	0.419742	0.83935	-1.57131
RREB1	ras responsive element binding protein 1 [Source:NCBI gene;Acc:395920]	8	6	2	2	45.2174	84.8389	55.5609	90.0638	51.5225		20.0506	21.4515	19.6657	20.8368	19.3854	RREB1	-0.985948	0.945721	-0.481669	1.20045	-0.678553		-0.266493	1.37523	-0.717544	0.654799	-1.04599
CREBRF	CREB3 regulatory factor [Source:NCBI gene;Acc:416206]	9	7	2	2	6.82589	6.06113	12.3699	11.9895	13.956		10.3976	9.10458	14.3652	11.6465	10.3125	CREBRF	-0.960762	-1.17594	0.599149	0.492121	1.04543		-0.383438	-1.02926	1.59825	0.240372	-0.42592
GPBP1L1	GC-rich promoter binding protein 1 like 1 [Source:NCBI gene;Acc:424603]	9	7	2	2	85.4916	114.584	94.7887	107.579	156.572		107.636	104.258	110.078	110.521	107.317	GPBP1L1	-0.958904	0.101357	-0.620078	-0.153948	1.63157		-0.1296	-1.47382	0.841697	1.01824	-0.256513
MAFG	MAF bZIP transcription factor G [Source:NCBI gene;Acc:769355]	9	7	2	2	8.54253	9.39511	9.50315	10.6733	19.9682		13.46	13.1634	13.5858	12.7434	13.7562	MAFG	-0.649882	-0.469632	-0.44679	-0.199402	1.76571		0.29671	-0.447602	0.612431	-1.5016	1.04006
ZBTB43	zinc finger and BTB domain containing 43 [Source:NCBI gene;Acc:417091]	9	7	2	2	11.2902	14.7477	11.8391	15.1143	15.1202		15.1693	14.0555	16.7433	15.1896	15.9724	ZBTB43	-1.23105	0.594065	-0.941315	0.787605	0.790697		-0.255645	-1.36474	1.31175	-0.235438	0.544068
ARID3A	AT-rich interaction domain 3A [Source:NCBI gene;Acc:100858440]	10	8	2	2	12.0561	32.0572	11.4519	34.0664	52.752		5.70006	6.11172	5.15935	6.58636	6.91923	ARID3A	-0.950888	0.20734	-0.985876	0.323687	1.40574		-0.565781	0.0234413	-1.3397	0.702799	1.17924
HMG20B	high mobility group 20B [Source:NCBI gene;Acc:426515]	10	8	2	2	44.6589	55.4092	48.5971	57.6901	56.6394		35.3121	38.3924	38.9456	38.4363	36.3445	HMG20B	-1.39707	0.494467	-0.704131	0.895812	0.710924		-1.38305	0.576507	0.928415	0.604433	-0.726304
SLC2A4RG	#N/A	10	8	2	2	6.77806	7.37862	5.71163	7.25537	9.40321		2.77876	3.06914	2.42887	3.34129	3.53322	SLC2A4RG	-0.392308	0.0544907	-1.1857	-0.0372072	1.56072		-0.57094	0.0882827	-1.36525	0.706096	1.14182
TFEB	transcription factor EB [Source:NCBI gene;Acc:419922]	10	8	2	2	8.15934	13.4783	12.036	12.6038	16.4366		15.3316	16.4318	13.9289	18.3378	17.4882	TFEB	-1.47116	0.313967	-0.170089	0.02046	1.30682		-0.557926	0.0735509	-1.36305	1.16755	0.679879
ZNF341	zinc finger protein 341 [Source:NCBI gene;Acc:419152]	10	8	2	2	10.5696	12.8548	13.6688	15.7081	14.7946		9.31302	11.0205	9.37455	10.3645	10.7699	ZNF341	-1.49444	-0.33664	0.0758227	1.10904	0.646214		-1.08467	1.08026	-1.00665	0.248539	0.762515
GATAD1	GATA zinc finger domain containing 1 [Source:NCBI gene;Acc:420551]	11	9	2	2	45.8871	46.178	28.2926	47.3023	59.0749		45.3969	49.3941	46.5362	46.3242	52.0591	GATAD1	0.0490987	0.0755385	-1.55022	0.177734	1.24785		-0.927376	0.529044	-0.512243	-0.58949	1.50007
PAWR	pro-apoptotic WT1 regulator [Source:NCBI gene;Acc:417870]	11	9	2	2	2.84019	41.5177	0.583189	19.5723	34.1911		20.7008	25.9225	34.6484	29.9082	31.4866	PAWR	-0.924863	1.1917	-1.04837	-0.00922625	0.790764		-1.45339	-0.484451	1.13471	0.255125	0.548002
TET2	tet methylcytosine dioxygenase 2 [Source:NCBI gene;Acc:422540]	11	9	2	2	33.9128	60.8245	66.8524	79.1027	75.9243		25.7844	21.724	26.8781	25.4886	29.0247	TET2	-1.63679	-0.139068	0.196404	0.878173	0.701285		0.0016809	-1.52567	0.413061	-0.109603	1.22053
ZBTB33	zinc finger and BTB domain containing 33 [Source:NCBI gene;Acc:422367]	11	9	2	2	72.4503	86.6846	85.5208	82.4582	90.0876		66.5312	70.2786	66.9393	67.0154	72.4091	ZBTB33	-1.63473	0.482582	0.309466	-0.146088	0.988769		-0.811606	0.634262	-0.654153	-0.624779	1.45628
ZNF622	zinc finger protein 622 [Source:NCBI gene;Acc:373921]	11	9	2	2	42.3021	50.81	37.0777	47.7678	51.4622		32.2344	33.3782	31.6345	35.0935	36.9614	ZNF622	-0.58626	0.806272	-1.44137	0.308333	0.913023		-0.746691	-0.221421	-1.02219	0.566254	1.42405
HOXD8	homeobox D8 [Source:NCBI gene;Acc:396301]	2	3	-1	1	40.4962	19.8731	30.3502	23.6537	11.9416		34.2231	34.2923	29.3175	24.0247	22.7051	HOXD8	1.40978	-0.49881	0.4708	-0.148929	-1.23284		0.970659	0.983308	0.0740172	-0.893397	-1.13459
NR2F2	nuclear receptor subfamily 2 group F member 2 [Source:NCBI gene;Acc:386585]	2	3	-1	1	216.655	42.8274	188.408	25.8806	38.5679		74.5509	75.7256	66.1729	57.494	54.188	NR2F2	1.23981	-0.647555	0.93311	-0.831558	-0.693804		0.916961	1.03765	0.0561616	-0.835549	-1.17523
PITX2	paired like homeodomain 2 [Source:NCBI gene;Acc:395862]	2	3	-1	1	49.1009	0.291196	21.6918	2.96589	2.55167		18.0706	9.63858	13.1536	7.09739	8.30585	PITX2	1.6275	-0.72408	0.306972	-0.595217	-0.615174		1.53741	-0.364119	0.428565	-0.937192	-0.664667
TBX15	T-box 15 [Source:NCBI gene;Acc:418313]	2	3	-1	1	329.825	0.39287	281.901	0.114087	15.8937		66.916	59.107	55.619	47.1034	39.1271	TBX15	1.23363	-0.756568	0.944107	-0.758252	-0.662923		1.23955	0.514018	0.189951	-0.601222	-1.3423
THYN1	thymocyte nuclear protein 1 [Source:NCBI gene;Acc:374161]	2	3	-1	1	117.081	25.6309	75.4761	25.8201	24.4082		176.875	163.317	165.22	129.24	116.013	THYN1	1.52484	-0.674711	0.524155	-0.67016	-0.70412		1.02602	0.505848	0.578851	-0.801628	-1.30909
ZEB1	zinc finger E-box binding homeobox 1 [Source:NCBI gene;Acc:396029]	2	3	-1	1	118.45	4.38197	70.9514	4.5384	6.55085		42.6546	37.4187	36.3334	24.5928	21.9389	ZEB1	1.4943	-0.705772	0.578172	-0.702755	-0.663941		1.13257	0.543505	0.421413	-0.899458	-1.19803
ZFHX3	zinc finger homeobox 3 [Source:NCBI gene;Acc:395682]	2	3	-1	1	105.538	62.9333	36.0999	43.0541	7.31174		11.2644	10.6541	10.6397	9.99475	9.18009	ZFHX3	1.49712	0.327853	-0.408583	-0.217725	-1.19867		1.15925	0.38833	0.37019	-0.444409	-1.47336
ZFHX4	zinc finger homeobox 4 [Source:NCBI gene;Acc:395904]	2	3	-1	1	127.31	26.0841	60.2295	15.4735	1.90359		7.17092	6.59768	7.14012	5.51244	4.00552	ZFHX4	1.61522	-0.40059	0.279379	-0.611889	-0.882119		0.808731	0.381682	0.785786	-0.426791	-1.54941
ZIC2	Zic family member 2 [Source:NCBI gene;Acc:428021]	2	3	-1	1	6.98921	0	3.05886	0	0.0328588		0.215914	0.196338	0.102977	0.0468195	0.0579351	ZIC2	1.61598	-0.655157	0.338815	-0.655157	-0.64448		1.17582	0.925391	-0.268887	-0.987256	-0.845064
E2F8	E2F transcription factor 8 [Source:NCBI gene;Acc:422978]	3	4	-1	1	50.2495	25.7601	24.965	37.3537	10.853		23.0597	21.542	22.2707	23.1068	19.6754	E2F8	1.38104	-0.27577	-0.329558	0.508585	-1.2843		0.797629	-0.274826	0.240085	0.830912	-1.5938
ELK3	ELK3, ETS transcription factor [Source:NCBI gene;Acc:417919]	3	4	-1	1	62.446	36.2331	56.563	27.2624	39.1967		38.5578	41.6616	37.9051	36.9711	32.2547	ELK3	1.23405	-0.552564	0.833075	-1.16399	-0.350574		0.319403	1.2308	0.127759	-0.146518	-1.53144
ERG	ERG, ETS transcription factor [Source:NCBI gene;Acc:374146]	3	4	-1	1	43.2476	0.117995	42.259	0.0564006	7.55671		20.258	20.4122	21.2291	16.2134	14.173	ERG	1.10719	-0.83397	1.06269	-0.836742	-0.499171		0.583234	0.633163	0.897712	-0.726655	-1.38745
HOXB4	homeobox B4 [Source:NCBI gene;Acc:396230]	3	4	-1	1	59.9489	20.6478	61.2158	15.8049	7.1414		64.8991	64.6828	66.266	58.4783	57.1609	HOXB4	1.05101	-0.478998	1.10033	-0.667531	-1.0048		0.625592	0.573597	0.954299	-0.918348	-1.23514
LHX6	LIM homeobox 6 [Source:NCBI gene;Acc:772259]	3	4	-1	1	4.72323	0.0847595	6.27639	0.167667	1.50322		22.8564	28.3993	20.4361	16.9977	13.8233	LHX6	0.774572	-0.879452	1.32841	-0.849888	-0.373646		0.421408	1.41374	-0.0118941	-0.627475	-1.19578
SOX17	SRY-box 17 [Source:NCBI gene;Acc:428534]	3	4	-1	1	7.68269	0	11.2038	0	1.66613		17.2734	17.9144	17.5416	11.9568	11.9332	SOX17	0.704489	-0.810662	1.39891	-0.810662	-0.482075		0.630337	0.837577	0.717027	-1.08867	-1.09627
THAP5	THAP domain containing 5 [Source:NCBI gene;Acc:417784]	3	4	-1	1	70.2806	41.4023	62.7516	43.0837	25.6411		42.4111	42.7993	42.2009	42.3357	39.5205	THAP5	1.21036	-0.404197	0.789424	-0.310192	-1.2854		0.421458	0.71487	0.262594	0.364467	-1.76339
TWIST1	twist family bHLH transcription factor 1 [Source:NCBI gene;Acc:395491]	3	4	-1	1	713.448	1.07067	964.897	0.378802	42.8895		59.7771	62.3885	59.1328	52.8997	48.5452	TWIST1	0.801061	-0.745808	1.34706	-0.747311	-0.655002		0.569433	1.03003	0.455801	-0.643606	-1.41166
ZMAT3	zinc finger matrin-type 3 [Source:NCBI gene;Acc:425428]	3	4	-1	1	17.9596	16.902	13.8089	13.7395	12.3503		15.3089	15.8942	15.0658	14.8263	15.0557	ZMAT3	1.2711	0.824102	-0.483132	-0.512466	-1.0996		0.192647	1.62527	-0.402415	-0.988487	-0.427015
ATF2	activating transcription factor 2 [Source:NCBI gene;Acc:395727]	4	5	-1	1	87.3067	73.746	93.343	79.9389	49.5191		43.4141	44.2671	46.6634	43.6513	42.4654	ATF2	0.622059	-0.178586	0.978449	0.187053	-1.60897		-0.43014	0.110872	1.63085	-0.279699	-1.03188
CREB1	cAMP responsive element binding protein 1 [Source:NCBI gene;Acc:395099]	4	5	-1	1	67.847	51.3124	70.4704	50.2172	26.1661		35.8394	34.6232	36.1036	35.5632	33.7586	CREB1	0.826399	-0.106667	0.974442	-0.168473	-1.5257		0.682156	-0.571458	0.954433	0.397463	-1.46259
FOXM1	forkhead box M1 [Source:NCBI gene;Acc:430534]	4	5	-1	1	52.6927	38.5017	41.8216	60.4206	9.71217		28.6213	28.6731	32.1611	28.7427	26.4408	FOXM1	0.623129	-0.109928	0.061568	1.02232	-1.59709		-0.149409	-0.124161	1.57616	-0.0902296	-1.21236
GLI3	GLI family zinc finger 3 [Source:NCBI gene;Acc:420769]	4	5	-1	1	109.357	66.8151	159.674	85.2517	18.0537		8.83435	8.59697	10.4113	8.4287	7.91971	GLI3	0.411576	-0.401803	1.37364	-0.049302	-1.33411		-0.00409641	-0.256277	1.6712	-0.435044	-0.97578
GTF2I	#N/A	4	5	-1	1	42.085	38.835	36.1036	32.5368	20.8968		26.5346	25.1938	27.8601	26.192	22.0737	GTF2I	0.978465	0.580648	0.2463	-0.190304	-1.61511		0.44306	-0.173342	1.05239	0.285556	-1.60766
HLX	H2.0 like homeobox [Source:NCBI gene;Acc:107052956]	4	5	-1	1	7.5572	0	15.2152	0.0252289	3.09214		9.93252	13.894	8.96344	9.05503	7.80557	HLX	0.371438	-0.808365	1.56698	-0.804427	-0.325631		0.00103093	1.69304	-0.412884	-0.373761	-0.90743
PKNOX1	PBX/knotted 1 homeobox 1 [Source:NCBI gene;Acc:418542]	4	5	-1	1	33.0318	25.3044	31.5753	31.8562	12.6748		21.3933	20.7248	22.3436	19.52	20.0371	PKNOX1	0.722838	-0.186391	0.551462	0.584513	-1.67242		0.529373	-0.0708951	1.38272	-1.15278	-0.688425
SMAD5	SMAD family member 5 [Source:NCBI gene;Acc:395679]	4	5	-1	1	221.108	198.575	271.96	188.953	171.67		118.636	116.52	124.014	106.235	111.384	SMAD5	0.275001	-0.306585	1.58756	-0.554936	-1.00104		0.48065	0.170449	1.26925	-1.33769	-0.58266
TCF15	transcription factor 15 (basic helix-loop-helix) [Source:NCBI gene;Acc:395788]	4	5	-1	1	3.60092	2.30496	4.44327	1.21554	2.3748		18.4014	21.5646	23.8333	19.3865	15.7122	TCF15	0.648994	-0.385505	1.3214	-1.25513	-0.329755		-0.445873	0.577488	1.31146	-0.127174	-1.3159
TMF1	TATA element modulatory factor 1 [Source:NCBI gene;Acc:426072]	4	5	-1	1	43.9207	44.8123	38.6533	39.4728	37.8392		43.3455	47.1474	46.2587	40.1767	43.9502	TMF1	0.932528	1.21145	-0.715226	-0.45885	-0.969897		-0.303653	1.08689	0.761854	-1.46261	-0.0824833
ZNF518B	zinc finger protein 518B [Source:NCBI gene;Acc:422841]	4	5	-1	1	47.1998	39.4386	53.1784	32.2823	14.1844		21.866	18.5254	22.3412	21.0323	18.2593	ZNF518B	0.657705	0.144327	1.05317	-0.329039	-1.52616		0.769743	-0.990074	1.02006	0.330521	-1.13025
ZNF770	aquarius intron-binding spliceosomal factor [Source:NCBI gene;Acc:423296]	4	5	-1	1	15.4886	14.1569	16.7856	13.6121	10.9634		15.1711	13.2313	15.4868	13.1293	14.3653	ZNF770	0.588016	-0.0202809	1.18052	-0.269143	-1.47911		0.826679	-0.966345	1.11849	-1.06069	0.0818661
ADNP	activity dependent neuroprotector homeobox [Source:NCBI gene;Acc:419350]	5	6	-1	1	182.386	181.507	234.468	171.176	71.0845		108.804	106.24	114.032	107.539	107.62	ADNP	0.239283	0.224533	1.11309	0.0511983	-1.62811		-0.0142391	-0.858393	1.70716	-0.430574	-0.403951
E4F1	E4F transcription factor 1 [Source:NCBI gene;Acc:416560]	5	6	-1	1	30.4756	32.2765	34.2861	33.5785	18.4789		25.2284	24.4554	26.3637	25.9272	24.6693	E4F1	0.100953	0.377876	0.686912	0.578097	-1.74384		-0.123641	-1.0757	1.27457	0.737056	-0.812281
ESR1	estrogen receptor 1 [Source:NCBI gene;Acc:396099]	5	6	-1	1	0.527775	0.0181829	5.84197	0.0445089	0.695033		7.47659	6.31434	7.89076	8.01158	6.19194	ESR1	-0.361025	-0.565962	1.77612	-0.555375	-0.293761		0.345292	-0.994467	0.822728	0.962	-1.13555
HDX	highly divergent homeobox [Source:NCBI gene;Acc:422272]	5	6	-1	1	29.0395	36.8045	24.6558	25.7676	9.54998		9.81353	9.17706	9.62899	8.3091	9.72864	HDX	0.390081	1.17153	-0.0510945	0.0607953	-1.57132		0.774974	-0.248217	0.478314	-1.64357	0.638503
NFATC3	nuclear factor of activated T-cells 3 [Source:NCBI gene;Acc:415711]	5	6	-1	1	95.1397	51.2816	99.5021	88.9812	68.6585		88.7352	85.7546	87.7749	93.1978	82.765	NFATC3	0.712277	-1.45303	0.927651	0.408227	-0.595122		0.28271	-0.490563	0.0335676	1.44049	-1.26621
DMTF1	cyclin D binding myb like transcription factor 1 [Source:NCBI gene;Acc:418646]	6	7	-1	1	19.9333	25.5706	28.9774	22.9431	17.7639		20.4708	21.5661	21.4484	20.6048	20.6661	DMTF1	-0.69785	0.569394	1.33524	-0.021253	-1.18553		-0.934493	1.19585	0.967008	-0.673829	-0.554538
SNAPC4	small nuclear RNA activating complex polypeptide 4 [Source:NCBI gene;Acc:417133]	6	7	-1	1	15.0714	17.799	21.2925	22.8695	10.8988		8.02167	8.6888	7.0005	8.68789	8.91486	SNAPC4	-0.522287	0.0441812	0.769723	1.09723	-1.38884		-0.308735	0.545632	-1.6165	0.544465	0.835138
ZNF384	zinc finger protein 384 [Source:NCBI gene;Acc:770350]	6	7	-1	1	29.4142	35.8271	37.1924	34.8842	17.3577		16.7496	17.046	17.6685	17.4114	16.9199	ZNF384	-0.18674	0.600642	0.768271	0.484866	-1.66704		-1.09351	-0.301889	1.36047	0.673818	-0.638897
ZNF76	zinc finger protein 76 [Source:NCBI gene;Acc:772107]	6	7	-1	1	12.4619	14.9625	15.1511	17.7215	10.7753		12.0841	10.9155	13.0984	13.2586	11.966	ZNF76	-0.65501	0.279562	0.350064	1.31076	-1.28537		-0.189481	-1.41708	0.875963	1.04419	-0.313591
ELF2	E74 like ETS transcription factor 2 [Source:NCBI gene;Acc:422439]	7	8	-1	1	41.2754	80.2396	80.2279	33.2026	24.9262		52.1786	64.5331	66.2492	55.6011	62.8884	ELF2	-0.404697	1.06916	1.06872	-0.710059	-1.02312		-1.3333	0.697428	0.979521	-0.770738	0.42709
ETV5	ETS variant 5 [Source:NCBI gene;Acc:395749]	7	8	-1	1	35.9465	184.644	61.536	115.458	21.7015		19.7063	20.7548	28.4733	28.3817	22.6614	ETV5	-0.717938	1.51028	-0.334482	0.473538	-0.931398		-1.02555	-0.774843	1.07064	1.04873	-0.318985
IRF1	interferon regulatory factor 1 [Source:NCBI gene;Acc:396384]	7	8	-1	1	3.13926	3.48789	3.913	7.36288	2.59145		13.3934	13.9515	12.9949	20.9533	14.0134	IRF1	-0.508343	-0.323665	-0.0984713	1.72901	-0.798532		-0.502321	-0.334253	-0.622356	1.77454	-0.315615
NR6A1	nuclear receptor subfamily 6 group A member 1 [Source:NCBI gene;Acc:772325]	7	8	-1	1	5.92314	13.3015	7.79086	11.4713	6.48049		6.24568	6.75243	6.5808	6.36664	6.59084	NR6A1	-0.948799	1.33128	-0.371627	0.765706	-0.776564		-1.30514	1.22308	0.366815	-0.701662	0.416908
TGIF2	TGFB induced factor homeobox 2 [Source:NCBI gene;Acc:428131]	7	8	-1	1	44.7957	114.422	77.6183	74.3314	18.7591		20.4688	21.906	16.5207	25.9406	19.6884	TGIF2	-0.585983	1.33948	0.321706	0.230808	-1.30601		-0.126886	0.291281	-1.27559	1.46514	-0.353953
ZNF692	zinc finger protein 692 [Source:NCBI gene;Acc:427095]	7	8	-1	1	16.8973	19.0739	28.4839	36.7936	10.7486		13.3132	12.6025	8.77796	19.486	9.97298	ZNF692	-0.536133	-0.324043	0.592874	1.40257	-1.13527		0.116065	-0.0548382	-0.974547	1.60049	-0.687172
BAZ2B	bromodomain adjacent to zinc finger domain 2B [Source:NCBI gene;Acc:395400]	8	9	-1	1	45.9058	57.2769	69.5845	67.2134	55.2523		25.6811	26.4269	30.3068	28.17	31.3234	BAZ2B	-1.37011	-0.184517	1.09872	0.851506	-0.395605		-1.1137	-0.806145	0.793936	-0.0872836	1.2132
EOMES	eomesodermin [Source:NCBI gene;Acc:428443]	8	9	-1	1	0.170833	4.91283	0	0.16022	0		0.0541606	0.023027	0.0969481	0.402647	0.203592	EOMES	-0.406143	1.78754	-0.485172	-0.411053	-0.485172		-0.662564	-0.86497	-0.384394	1.60301	0.308917
ESRRG	estrogen related receptor gamma [Source:NCBI gene;Acc:421357]	8	9	-1	1	17.2497	20.2077	18.807	16.3405	63.311		6.2481	7.64772	6.51772	7.37892	9.37095	ESRRG	-0.490539	-0.344465	-0.413635	-0.535438	1.78408		-0.963489	0.174903	-0.744188	-0.043731	1.57651
HESX1	HESX homeobox 1 [Source:NCBI gene;Acc:395864]	8	9	-1	1	3.11224	3.70678	3.19412	4.80113	3.82823		6.57555	7.25844	8.9824	7.15075	8.93881	HESX1	-0.912031	-0.0321445	-0.790853	1.58743	0.147599		-1.0885	-0.471958	1.08449	-0.569182	1.04514
HMGXB3	HMG-box containing 3 [Source:NCBI gene;Acc:416278]	8	9	-1	1	14.1248	22.7003	17.7158	21.1156	16.2118		16.1211	16.0566	16.5935	16.6776	16.9625	HMGXB3	-1.20906	1.2312	-0.18721	0.78026	-0.615188		-0.938097	-1.10574	0.288866	0.507426	1.24755
SMAD6	SMAD family member 6 [Source:NCBI gene;Acc:374096]	8	9	-1	1	44.3814	19.737	72.1944	55.559	253.23		37.3236	40.0486	36.6944	55.6663	63.2	SMAD6	-0.476121	-0.738979	-0.179466	-0.3569	1.75147		-0.766053	-0.540689	-0.81809	0.750895	1.37394
STAT4	signal transducer and activator of transcription 4 [Source:NCBI gene;Acc:768406]	8	9	-1	1	0.0142711	0	0.0274795	0	0.0783202		0.255451	0.264891	0.453812	2.10889	0.846622	STAT4	-0.300339	-0.740262	0.106823	-0.740262	1.67404		-0.682423	-0.670279	-0.427247	1.70188	0.0780706
TCFL5	transcription factor like 5 [Source:NCBI gene;Acc:771446]	8	9	-1	1	1.49301	1.84403	1.19093	7.35033	1.9194		2.38191	1.61171	3.3033	3.41948	4.13527	TCFL5	-0.490366	-0.354461	-0.607322	1.77743	-0.325279		-0.598859	-1.38273	0.338873	0.457114	1.1856
TFAP2B	transcription factor AP-2 beta [Source:NCBI gene;Acc:395713]	8	9	-1	1	8.82523	245.974	1.62845	129.243	22.562		14.7674	12.3897	17.6749	19.4766	19.0106	TFAP2B	-0.690679	1.55857	-0.758937	0.451435	-0.560391		-0.629474	-1.4187	0.335595	0.933638	0.77894
TP73	tumor protein p73 [Source:NCBI gene;Acc:419382]	8	9	-1	1	3.20369	83.5145	2.54999	85.3807	15.8491		11.8236	12.7183	17.312	21.1632	16.396	TP73	-0.818276	1.06494	-0.833605	1.1087	-0.521753		-1.07829	-0.840624	0.37973	1.4028	0.136389
ZNF335	zinc finger protein 335 [Source:NCBI gene;Acc:396131]	8	9	-1	1	52.4414	57.3343	56.154	69.807	58.7647		42.3102	45.602	41.8531	47.7744	48.3289	ZNF335	-0.988751	-0.239729	-0.420417	1.66965	-0.0207499		-0.95282	0.142508	-1.1049	0.86535	1.04986
ATMIN	ATM interactor [Source:NCBI gene;Acc:426138]	9	10	-1	1	12.3999	21.0576	14.388	22.3096	22.0014		15.8761	16.2094	15.9564	17.7216	20.0583	ATMIN	-1.29023	0.561809	-0.864935	0.829651	0.763705		-0.722528	-0.535589	-0.677496	0.312521	1.62309
DLX2	distal-less homeobox 2 [Source:NCBI gene;Acc:107053847]	9	10	-1	1	1.83779	1.38099	0.686845	6.5243	3.7885		0.0666893	0.0769195	0.161912	1.8628	1.58772	DLX2	-0.426568	-0.620282	-0.914644	1.56083	0.400666		-0.764612	-0.753185	-0.658247	1.24166	0.934385
DLX3	distal-less homeobox 3 [Source:NCBI gene;Acc:395590]	9	10	-1	1	1.04849	50.4541	3.73689	166.384	812.858		38.4419	49.2104	55.9145	78.8793	101.444	DLX3	-0.596127	-0.453051	-0.588342	-0.117321	1.75484		-1.04149	-0.615635	-0.350514	0.557654	1.44998
DLX5	distal-less homeobox 5 [Source:NCBI gene;Acc:373969]	9	10	-1	1	24.4993	37.8125	25.8559	129.613	298.044		13.8211	15.6032	14.7982	42.4235	53.3225	DLX5	-0.670173	-0.556754	-0.658616	0.225317	1.66023		-0.763505	-0.667498	-0.710866	0.77736	1.36451
EHF	ETS homologous factor [Source:NCBI gene;Acc:425791]	9	10	-1	1	0	2.76656	0.0600732	11.3637	91.5733		2.65201	4.4892	12.882	21.7516	27.0791	EHF	-0.533623	-0.46383	-0.532107	-0.24695	1.77651		-1.0467	-0.873747	-0.0836704	0.751296	1.25282
ELF5	E74 like ETS transcription factor 5 [Source:NCBI gene;Acc:428859]	9	10	-1	1	0.466628	23.1288	0.13601	25.6587	16.9972		1.91264	3.36053	2.8903	4.19126	3.99997	ELF5	-1.04513	0.803688	-1.07211	1.01009	0.303463		-1.47843	0.0975082	-0.414302	1.00172	0.793509
ESRRB	estrogen related receptor beta [Source:NCBI gene;Acc:771938]	9	10	-1	1	0.196042	0.708533	0.17813	2.69857	12.877		0.301796	0.373707	0.213294	1.04833	1.87181	ESRRB	-0.576893	-0.482605	-0.580189	-0.116474	1.75616		-0.65425	-0.55197	-0.780127	0.407554	1.57879
FOXN1	forkhead box N1 [Source:NCBI gene;Acc:417570]	9	10	-1	1	0.428278	9.32591	0.0835486	4.33093	91.3363		3.78998	3.75949	4.78736	9.98088	12.8155	FOXN1	-0.524159	-0.298559	-0.5329	-0.425207	1.78082		-0.782689	-0.790062	-0.541504	0.714393	1.39986
GRHL1	#N/A	9	10	-1	1	2.84057	103.595	2.18493	146.584	621.944		43.5155	57.0969	80.1241	167.958	202.174	GRHL1	-0.670321	-0.279	-0.672868	-0.112033	1.73422		-0.943479	-0.751249	-0.425322	0.817879	1.30217
HEYL	hes related family bHLH transcription factor with YRPW motif-like [Source:NCBI gene;Acc:771101]	9	10	-1	1	41.9767	69.5856	76.7281	44.6535	68.3965		12.0503	15.4761	14.5378	32.4595	33.386	HEYL	-1.15557	0.588641	1.03988	-0.986465	0.513519		-0.913584	-0.585229	-0.675162	1.04258	1.13139
ID2	inhibitor of DNA binding 2, HLH protein [Source:NCBI gene;Acc:395852]	9	10	-1	1	402.763	132.152	366.043	359.575	539.813		120.394	128.239	120.825	192.003	182.529	ID2	0.290978	-1.55336	0.0407157	-0.00336805	1.22504		-0.802073	-0.580542	-0.789904	1.22002	0.952495
KLF3	Kruppel-like factor 3 (basic) [Source:NCBI gene;Acc:429811]	9	10	-1	1	19.6316	34.42	16.7219	46.3861	91.1838		29.8441	31.1084	34.1782	36.0845	36.8239	KLF3	-0.731073	-0.240473	-0.827601	0.156499	1.64265		-1.23393	-0.819415	0.187001	0.811965	1.05438
LMX1B	LIM homeobox transcription factor 1 beta [Source:NCBI gene;Acc:396312]	9	10	-1	1	5.59754	280.484	4.18155	227.6	158.499		11.3879	14.9616	25.4647	43.0696	52.6646	LMX1B	-1.02397	1.14665	-1.03515	0.729057	0.183407		-1.01445	-0.814399	-0.226439	0.75908	1.29621
MSX1	msh homeobox 1 [Source:NCBI gene;Acc:396484]	9	10	-1	1	2.35866	29.9679	1.18915	36.5374	23.9099		3.97403	4.26289	3.46058	11.8934	9.90969	MSX1	-1.01631	0.691101	-1.08863	1.09738	0.316462		-0.697293	-0.623405	-0.828626	1.32836	0.82096
TFAP2C	transcription factor AP-2 gamma [Source:NCBI gene;Acc:419327]	9	10	-1	1	5.25262	138.182	84.1062	250.402	183.832		31.7043	36.117	48.5012	96.5731	98.9248	TFAP2C	-1.35681	0.0622031	-0.515053	1.26014	0.549514		-0.93208	-0.797929	-0.421442	1.03998	1.11147
THAP4	THAP domain containing 4 [Source:NCBI gene;Acc:429271]	9	10	-1	1	33.2003	39.574	41.7382	43.6417	87.2852		40.3789	42.7521	41.4963	45.0202	47.1621	THAP4	-0.731743	-0.438186	-0.338506	-0.250837	1.75927		-1.0903	-0.2229	-0.681869	0.606093	1.38898
ZBTB24	zinc finger and BTB domain containing 24 [Source:NCBI gene;Acc:421763]	9	10	-1	1	11.9739	19.1767	11.0229	19.8053	16.3977		9.84336	12.3968	11.8916	13.3408	13.9884	ZBTB24	-0.916918	0.867366	-1.15249	1.02308	0.17896		-1.53767	0.0656591	-0.251526	0.658428	1.06511
ZNF143	zinc finger protein 143 [Source:NCBI gene;Acc:428845]	9	10	-1	1	10.1569	12.071	10.8539	12.5465	11.9322		10.0128	10.4587	10.3533	9.98993	10.7223	ZNF143	-1.38521	0.571318	-0.672772	1.05726	0.429403		-0.950046	0.487955	0.148071	-1.02369	1.33771
ZNF750	zinc finger protein 750 [Source:NCBI gene;Acc:101750712]	9	10	-1	1	1.63072	77.7073	0.536822	143.291	541.721		60.3494	56.1837	62.6558	79.406	95.2348	ZNF750	-0.671782	-0.334101	-0.676637	-0.0429945	1.72551		-0.639794	-0.895655	-0.498133	0.530684	1.5029
CSRNP1	cysteine and serine rich nuclear protein 1 [Source:NCBI gene;Acc:420425]	4	3	1	1	83.6967	12.5259	123.232	43.7774	69.5008		53.7629	56.8973	48.3818	39.1804	47.3802	CSRNP1	0.41136	-1.29572	1.35963	-0.546133	0.0708612		0.683713	1.14535	-0.108798	-1.46396	-0.256311
DMBX1	diencephalon/mesencephalon homeobox 1 [Source:NCBI gene;Acc:395271]	4	3	1	1	2.26924	0	4.43632	0.0615977	0.279244		1.01125	0.612846	0.663132	0.29648	0.319465	DMBX1	0.444349	-0.728191	1.56411	-0.696363	-0.583902		1.47218	0.110126	0.282046	-0.971469	-0.892886
ETV6	ETS variant 6 [Source:NCBI gene;Acc:395750]	4	3	1	1	21.9726	12.1464	33.3007	16.4319	16.1616		31.228	31.1917	27.7429	29.2676	25.1328	ETV6	0.239797	-0.956331	1.61876	-0.434666	-0.46756		0.902347	0.88822	-0.455862	0.138347	-1.47305
FOXO6	forkhead box O6 [Source:NCBI gene;Acc:100857767]	4	3	1	1	31.9108	5.70355	74.1724	7.57516	19.2339		59.3943	55.7796	43.4164	29.192	31.143	FOXO6	0.149657	-0.78603	1.65853	-0.719207	-0.30295		1.13209	0.869928	-0.0267389	-1.05839	-0.916891
GLIS2	#N/A	4	3	1	1	50.5428	27.9305	72.2289	31.5571	28.3776		93.211	91.5636	66.8202	53.3072	56.0916	GLIS2	0.437606	-0.738244	1.5653	-0.549662	-0.714995		1.09917	1.01299	-0.281355	-0.988227	-0.842574
IRF5	interferon regulatory factor 5 [Source:NCBI gene;Acc:430409]	4	3	1	1	2.83736	0.603686	2.19946	1.78833	1.02967		5.02704	5.04886	4.19254	3.93964	2.59662	IRF5	1.28053	-1.2161	0.56754	0.108003	-0.739973		0.86227	0.883996	0.0314646	-0.220326	-1.5574
IRF8	interferon regulatory factor 8 [Source:NCBI gene;Acc:396385]	4	3	1	1	27.2115	17.8572	25.297	25.7958	10.1485		61.5138	57.8475	49.2861	52.6583	44.2402	IRF8	0.826369	-0.472918	0.56045	0.62973	-1.54363		1.23064	0.693798	-0.559789	-0.0660249	-1.29863
JAZF1	JAZF zinc finger 1 [Source:NCBI gene;Acc:420633]	4	3	1	1	19.3299	4.48959	41.3733	5.82331	5.7698		28.373	25.457	27.7519	20.1118	18.4095	JAZF1	0.252075	-0.689558	1.65075	-0.604933	-0.608328		0.963081	0.317843	0.825646	-0.86495	-1.24162
MEOX1	mesenchyme homeobox 1 [Source:NCBI gene;Acc:395533]	4	3	1	1	1.84719	1.26235	4.23648	0.792601	0.409969		0.890055	0.821018	0.476914	0.703685	0.438196	MEOX1	0.0909743	-0.296049	1.6721	-0.60691	-0.86012		1.10903	0.767351	-0.935698	0.186641	-1.12732
MEOX2	mesenchyme homeobox 2 [Source:NCBI gene;Acc:374137]	4	3	1	1	13.3063	0.0604863	42.6575	0.0357366	9.23635		100.718	101.356	90.4071	66.7241	55.3926	MEOX2	0.0140899	-0.741484	1.68836	-0.742896	-0.218069		0.855139	0.885806	0.35975	-0.778131	-1.32256
NFIA	nuclear factor I A [Source:NCBI gene;Acc:396210]	4	3	1	1	480.506	217.44	720.007	191.998	87.3708		65.2726	59.4497	63.8043	47.0446	46.0877	NFIA	0.548078	-0.474179	1.47876	-0.573043	-0.979618		0.97452	0.339841	0.814484	-1.01227	-1.11657
NFIC	nuclear factor I C [Source:NCBI gene;Acc:396208]	4	3	1	1	102.949	7.80307	247.156	5.52208	47.6432		92.6931	88.9547	84.6707	86.5734	72.328	NFIC	0.206701	-0.741806	1.64429	-0.764545	-0.344642		0.991687	0.507017	-0.0483952	0.198278	-1.64859
NFIX	nuclear factor I X [Source:NCBI gene;Acc:396207]	4	3	1	1	162.921	22.1241	349.592	78.6642	76.7054		331.692	309.228	253.071	220.286	195.875	NFIX	0.193854	-0.901439	1.64602	-0.461599	-0.476837		1.209	0.819136	-0.155493	-0.724485	-1.14816
NPAS3	neuronal PAS domain protein 3 [Source:NCBI gene;Acc:423315]	4	3	1	1	33.0294	1.91965	57.3408	10.56	2.97522		5.48228	4.6916	4.57915	3.79614	3.52185	NPAS3	0.49879	-0.809092	1.52086	-0.445844	-0.764715		1.37225	0.356395	0.211921	-0.794086	-1.14648
NR1H3	nuclear receptor subfamily 1 group H member 3 [Source:NCBI gene;Acc:395221]	4	3	1	1	59.6916	44.9423	56.4558	46.5036	57.6604		116.946	118.856	107.643	100.877	94.7004	NR1H3	0.975028	-1.1905	0.499942	-0.961269	0.676798		0.886438	1.07159	-0.0156912	-0.671704	-1.27063
OSR1	odd-skipped related transciption factor 1 [Source:NCBI gene;Acc:100316920]	4	3	1	1	385.901	0.643025	654.097	0.88672	62.3956		126.629	106.895	89.5142	59.3546	53.019	OSR1	0.568921	-0.758515	1.49301	-0.757675	-0.545742		1.26787	0.63522	0.077966	-0.888966	-1.09209
PAX1	paired box 1 [Source:NCBI gene;Acc:100859138]	4	3	1	1	1.92874	0	3.05226	0.183739	0.277003		8.66655	6.22698	4.8129	1.9818	1.65722	PAX1	0.625334	-0.809841	1.46135	-0.673121	-0.603722		1.35682	0.528782	0.0488101	-0.912122	-1.02229
POU6F1	POU class 6 homeobox 1 [Source:HGNC Symbol;Acc:HGNC:9224]	4	3	1	1	4.16252	2.34969	10.2604	2.21563	1.05595		4.04238	3.41718	3.58816	3.59788	2.88095	POU6F1	0.0419094	-0.452428	1.70472	-0.488986	-0.805216		1.2825	-0.210454	0.197834	0.221053	-1.49094
PRRX1	paired related homeobox 1 [Source:NCBI gene;Acc:373941]	4	3	1	1	532.635	1.18364	1012.32	0.366007	67.0273		228.967	243.818	194.015	164.78	142.572	PRRX1	0.471691	-0.722436	1.54951	-0.724273	-0.574491		0.804617	1.15467	-0.0192169	-0.708305	-1.23177
RBPJ	recombination signal binding protein for immunoglobulin kappa J region [Source:NCBI gene;Acc:422802]	4	3	1	1	31.7487	19.4565	37.8033	26.0273	24.5945		51.4512	44.5469	47.5656	43.2249	37.1867	RBPJ	0.542489	-1.20196	1.40173	-0.269458	-0.472802		1.25569	-0.0468235	0.522662	-0.296204	-1.43532
TEAD4	TEA domain transcription factor 4 [Source:NCBI gene;Acc:395542]	4	3	1	1	34.4719	25.1835	44.2904	23.0623	17.6549		27.4384	26.3487	25.0765	24.7812	22.0206	TEAD4	0.526809	-0.35655	1.46058	-0.558291	-1.07255		1.13142	0.596592	-0.0277748	-0.172691	-1.52754
TSHZ1	teashirt zinc finger homeobox 1 [Source:NCBI gene;Acc:428513]	4	3	1	1	12.8663	10.3373	18.1397	7.94315	3.71126		7.14556	6.60329	6.87	5.4771	4.45475	TSHZ1	0.419903	-0.0485826	1.39677	-0.492079	-1.27601		0.923	0.439606	0.677358	-0.564309	-1.47566
ZEB2	zinc finger E-box binding homeobox 2 [Source:NCBI gene;Acc:424306]	4	3	1	1	232.409	20.7357	888.717	11.1943	59.2003		197.742	187.527	188.706	157.158	137.03	ZEB2	-0.0269851	-0.595771	1.73658	-0.62141	-0.492413		0.943354	0.543668	0.589775	-0.644615	-1.43218
ZMIZ1	zinc finger MIZ-type containing 1 [Source:NCBI gene;Acc:423724]	4	3	1	1	82.2026	61.3728	90.4782	60.9211	36.1532		37.0192	34.0836	35.7115	31.2747	28.9675	ZMIZ1	0.753271	-0.228795	1.14344	-0.250089	-1.41783		1.09948	0.204883	0.700958	-0.65112	-1.3542
ZNF536	zinc finger protein 536 [Source:NCBI gene;Acc:415761]	4	3	1	1	33.431	0.438189	75.6775	0.219446	5.11245		6.91051	5.52683	6.01306	4.10517	4.16873	ZNF536	0.321449	-0.692916	1.62031	-0.699641	-0.549205		1.29452	0.150457	0.552491	-1.02502	-0.972456
ZNF639	zinc finger protein 639 [Source:NCBI gene;Acc:425280]	4	3	1	1	50.332	38.0764	47.4426	31.963	16.7135		36.4111	34.8583	35.062	32.6811	30.2343	ZNF639	0.997419	0.0869825	0.782778	-0.367166	-1.50001		1.05724	0.416408	0.500454	-0.482138	-1.49196
ZXDC	#N/A	4	3	1	1	29.7547	27.0665	31.6892	24.6469	17.4325		28.5875	28.4901	26.4113	26.3984	25.1295	ZXDC	0.656446	0.171222	1.00564	-0.26553	-1.56778		1.05916	0.994073	-0.395842	-0.404521	-1.25287
ARNT2	aryl hydrocarbon receptor nuclear translocator 2 [Source:NCBI gene;Acc:415481]	5	4	1	1	24.7464	24.8431	26.4099	26.1955	5.89681		8.15292	7.88552	8.81788	7.9662	6.57422	ARNT2	0.354606	0.365571	0.54318	0.518872	-1.78223		0.335064	0.00756497	1.14947	0.106367	-1.59846
EBF1	early B-cell factor 1 [Source:NCBI gene;Acc:395512]	5	4	1	1	14.1865	0.507999	214.145	0.483048	20.8838		18.0266	22.2731	16.9223	17.2998	13.5699	EBF1	-0.389041	-0.537459	1.7806	-0.537729	-0.316372		0.131066	1.49437	-0.223458	-0.102261	-1.29972
EBF2	early B-cell factor 2 [Source:NCBI gene;Acc:395176]	5	4	1	1	4.45086	0.148454	17.4029	0.904278	1.627		15.6844	16.5624	14.0354	8.706	7.52508	EBF2	-0.0635546	-0.6634	1.74224	-0.558022	-0.45726		0.770868	0.98358	0.371347	-0.919842	-1.20595
ETS2	ETS proto-oncogene 2, transcription factor [Source:NCBI gene;Acc:396250]	5	4	1	1	152.934	8.73669	106.689	14.4706	145.892		105.14	108.343	106.033	90.0902	91.0182	ETS2	0.960318	-1.10065	0.299358	-1.01869	0.859662		0.568598	0.93171	0.669733	-1.13763	-1.03241
HSF2	heat shock transcription factor 2 [Source:NCBI gene;Acc:421724]	5	4	1	1	72.3675	71.1831	117.751	79.5857	38.3292		62.5025	59.2967	59.9039	51.9488	56.9773	HSF2	-0.122672	-0.164474	1.47904	0.132078	-1.32397		1.10139	0.294652	0.447461	-1.55447	-0.289034
KLF6	Kruppel like factor 6 [Source:NCBI gene;Acc:420463]	5	4	1	1	72.312	24.0204	53.6966	31.8461	75.6688		98.781	83.2776	99.1444	68.1682	69.0295	KLF6	0.894503	-1.18195	0.0940723	-0.845462	1.03884		0.994315	-0.0265073	1.01825	-1.02138	-0.96467
L3MBTL1	#N/A	5	4	1	1	5.96547	5.75495	9.88339	6.77298	2.97848		6.93387	7.09444	6.73504	5.56325	5.63627	L3MBTL1	-0.123472	-0.208532	1.45955	0.202803	-1.33035		0.736153	0.954535	0.465742	-1.12787	-1.02856
MEIS2	Meis homeobox 2 [Source:NCBI gene;Acc:395588]	5	4	1	1	123.42	121.137	161.157	101.574	30.266		53.6005	50.3491	56.5085	48.1753	45.1151	MEIS2	0.329608	0.282304	1.11146	-0.122994	-1.60037		0.63814	-0.0896735	1.2891	-0.576272	-1.26129
MLXIP	MLX interacting protein [Source:NCBI gene;Acc:416857]	5	4	1	1	53.5743	58.2878	62.2081	41.0349	23.5379		38.0691	39.1852	41.7938	36.7947	33.0062	MLXIP	0.372457	0.672781	0.92256	-0.426488	-1.54131		0.0924362	0.437181	1.2429	-0.301179	-1.47134
MYBL1	MYB proto-oncogene like 1 [Source:NCBI gene;Acc:396158]	5	4	1	1	6.67901	4.42397	3.74211	10.827	1.44982		11.1071	11.0418	12.1328	10.0179	9.79906	MYBL1	0.353488	-0.281859	-0.473971	1.52216	-1.11982		0.305474	0.236015	1.39561	-0.85224	-1.08486
PRDM4	PR/SET domain 4 [Source:NCBI gene;Acc:418065]	5	4	1	1	31.3101	34.0971	31.3638	26.4813	12.3825		20.3927	22.2951	18.8328	18.2129	16.9555	PRDM4	0.481543	0.802376	0.487729	-0.074325	-1.69732		0.510888	1.43222	-0.24455	-0.544807	-1.15375
PRDM5	PR/SET domain 5 [Source:NCBI gene;Acc:422673]	5	4	1	1	9.70932	8.06659	19.2158	6.61402	3.955		11.2684	10.734	13.4395	9.58009	8.00152	PRDM5	0.0338703	-0.248303	1.6668	-0.497811	-0.954553		0.328576	0.064009	1.40345	-0.507259	-1.28878
PROX1	prospero homeobox 1 [Source:NCBI gene;Acc:395802]	5	4	1	1	6.47473	6.41555	7.85691	5.33314	1.03697		2.78632	2.14741	2.83628	1.48206	1.85944	PROX1	0.402695	0.380027	0.932149	-0.0345985	-1.68027		0.960141	-0.12749	1.04518	-1.26012	-0.61771
RFXANK	regulatory factor X associated ankyrin containing protein [Source:NCBI gene;Acc:426623]	5	4	1	1	29.0851	30.9227	28.3442	29.2116	25.4893		31.6823	31.6486	28.7498	30.4203	29.1265	RFXANK	0.239163	1.16537	-0.134251	0.302908	-1.57319		0.9895	0.964911	-1.14913	0.0691114	-0.874396
SMARCA1	SWI/SNF related, matrix associated, actin dependent regulator of chromatin, subfamily a, member 1 [Source:NCBI gene;Acc:422358]	5	4	1	1	62.7264	46.2143	95.1737	48.2935	20.5265		46.2904	47.1182	44.5622	47.9928	38.0421	SMARCA1	0.298039	-0.306574	1.48615	-0.230442	-1.24717		0.373725	0.581477	-0.0599581	0.800955	-1.6962
ZNF319	zinc finger protein 319 [Source:NCBI gene;Acc:427526]	5	4	1	1	20.0573	21.1564	22.9259	18.4158	14.3284		13.4341	14.305	13.4787	12.6449	12.0291	ZNF319	0.208448	0.545094	1.08708	-0.294327	-1.5463		0.293804	1.2944	0.345113	-0.612919	-1.3204
ZNF362	zinc finger protein 362 [Source:NCBI gene;Acc:100859829]	5	4	1	1	101.622	89.84	153.444	103.71	28.8169		52.161	49.42	54.4936	46.8426	42.3115	ZNF362	0.137694	-0.12673	1.30076	0.184574	-1.4963		0.657761	0.07901	1.15025	-0.465168	-1.42185
ZNF395	zinc finger protein 395 [Source:NCBI gene;Acc:422017]	5	4	1	1	31.5022	25.1714	39.9026	41.892	15.0539		14.6528	15.4303	14.0919	15.1484	12.4804	ZNF395	0.072382	-0.501986	0.834514	1.015	-1.41991		0.250005	0.915665	-0.230155	0.674277	-1.60979
ZNF512B	zinc finger protein 512B [Source:NCBI gene;Acc:771616]	5	4	1	1	57.3052	44.859	106.446	47.5758	38.4623		57.5146	58.611	57.1753	56.9022	52.1311	ZNF512B	-0.0592534	-0.513254	1.73325	-0.414153	-0.746586		0.417559	0.854509	0.282326	0.173508	-1.7279
ZNF592	zinc finger protein 592 [Source:NCBI gene;Acc:415335]	5	4	1	1	30.6353	32.9028	39.7244	31.3038	13.8461		25.1107	25.081	25.3618	21.5158	22.3965	ZNF592	0.0996741	0.336871	1.05046	0.169596	-1.65661		0.67689	0.66038	0.816454	-1.32167	-0.832056
CREBZF	#N/A	6	5	1	1	8.54974	10.4841	7.68287	10.0025	6.60701		13.5109	11.6736	13.6844	12.7698	11.0307	CREBZF	-0.0719434	1.13287	-0.611859	0.832877	-1.28194		0.846106	-0.745002	0.996343	0.204331	-1.30178
DEAF1	DEAF1, transcription factor [Source:NCBI gene;Acc:423017]	6	5	1	1	8.21737	7.01445	12.1143	11.7517	5.72527		6.1784	6.76468	6.25772	6.52128	5.86927	DEAF1	-0.261979	-0.683709	1.10425	0.977118	-1.13568		-0.410086	1.30884	-0.177514	0.595198	-1.31644
HOXA3	homeobox A3 [Source:NCBI gene;Acc:395231]	6	5	1	1	67.3551	127.024	136.476	82.3387	26.8923		32.2001	29.8432	31.7308	31.1291	30.3175	HOXA3	-0.460147	0.868684	1.07918	-0.12646	-1.36126		1.18831	-1.23456	0.705838	0.0873575	-0.746949
HOXA6	homeobox A6 [Source:NCBI gene;Acc:420630]	6	5	1	1	49.3412	83.1081	63.9737	52.5387	9.08177		11.8108	12.9891	12.0417	10.4837	12.0847	HOXA6	-0.0833595	1.15801	0.454573	0.034189	-1.56341		-0.0789867	1.22775	0.177083	-1.55065	0.224805
MYSM1	Myb like, SWIRM and MPN domains 1 [Source:NCBI gene;Acc:424671]	6	5	1	1	19.4707	17.719	27.3332	23.0209	15.6191		26.3036	25.1793	26.1239	23.4617	25.0699	MYSM1	-0.251201	-0.629911	1.44867	0.516355	-1.08391		0.95222	-0.0427922	0.793178	-1.56295	-0.139657
NCOA3	nuclear receptor coactivator 3 [Source:NCBI gene;Acc:419208]	6	5	1	1	45.8324	48.7565	40.4082	23.4271	19.1029		22.9716	21.4381	24.8802	21.0928	21.1624	NCOA3	0.769084	0.986854	0.365127	-0.899517	-1.22155		0.40699	-0.534941	1.57928	-0.747043	-0.704282
NFYB	Nuclear transcription factor Y subunit beta [Source:UniProtKB/Swiss-Prot;Acc:P25207]	6	5	1	1	57.3673	77.693	87.938	85.8237	31.4174		63.158	56.8809	63.821	50.1667	58.7497	NFYB	-0.449285	0.405731	0.836692	0.747752	-1.54089		0.833006	-0.303028	0.952995	-1.51817	0.035195
NFYC	nuclear transcription factor Y subunit gamma [Source:NCBI gene;Acc:419642]	6	5	1	1	94.7951	127.666	98.4036	95.7676	71.6809		84.3983	97.6854	82.7756	85.7085	82.451	NFYC	-0.143929	1.506	0.0371973	-0.0951187	-1.30415		-0.348308	1.75015	-0.604587	-0.141395	-0.655857
PBX1	PBX homeobox 1 [Source:NCBI gene;Acc:395505]	6	5	1	1	110.918	137.737	175.902	105.774	65.1152		68.5236	65.9477	72.0914	66.1676	61.3889	PBX1	-0.199165	0.454527	1.38478	-0.324549	-1.31559		0.433938	-0.223673	1.34478	-0.167535	-1.38751
POU2F1	POU class 2 homeobox 1 [Source:NCBI gene;Acc:396463]	6	5	1	1	18.6402	30.3036	28.5182	36.4872	9.42217		5.68998	4.82171	6.17758	4.93533	4.79875	POU2F1	-0.565735	0.527787	0.360391	1.10754	-1.42998		0.654479	-0.747574	1.44184	-0.564098	-0.78465
TCF3	transcription factor 3 [Source:NCBI gene;Acc:395146]	6	5	1	1	202.307	270.441	239.507	150.288	68.9187		59.7805	67.3973	64.2957	61.6925	57.2099	TCF3	0.201591	1.05929	0.669884	-0.45323	-1.47753		-0.581276	1.34815	0.562468	-0.0969262	-1.23242
USF3	upstream transcription factor family member 3 [Source:NCBI gene;Acc:418320]	6	5	1	1	17.054	22.4542	22.9149	22.8214	10.1496		9.75907	9.21906	10.4811	7.98144	8.9888	USF3	-0.363743	0.606368	0.689126	0.672332	-1.60408		0.50973	-0.0719993	1.28757	-1.40525	-0.320056
ZBTB34	zinc finger and BTB domain containing 34 [Source:NCBI gene;Acc:417090]	6	5	1	1	22.6252	27.2582	25.3789	29.9453	18.8445		15.5779	14.3005	16.258	12.9309	14.5728	ZBTB34	-0.511353	0.572796	0.133022	1.20158	-1.39604		0.666727	-0.335428	1.20026	-1.40979	-0.121772
FOXN3	forkhead box N3 [Source:NCBI gene;Acc:423402]	7	6	1	1	42.3983	71.2566	44.0502	54.174	43.1806		25.946	28.2962	28.7248	26.2249	25.911	FOXN3	-0.701061	1.64771	-0.566618	0.257363	-0.637395		-0.782142	0.928448	1.24042	-0.579158	-0.807569
HOXA4	homeobox A4 [Source:NCBI gene;Acc:395307]	7	6	1	1	26.3092	122.309	43.5181	65.9462	17.8178		27.3123	27.2032	28.2729	28.8551	25.1468	HOXA4	-0.690755	1.6061	-0.279021	0.257585	-0.893915		-0.0323476	-0.109559	0.647147	1.05897	-1.56421
NOTO	notochord homeobox [Source:NCBI gene;Acc:396302]	7	6	1	1	0.227672	7.97099	0	1.07414	0.019289		0.0178759	0.049544	0.0199549	0.0313216	0.0190869	NOTO	-0.473356	1.77429	-0.539442	-0.227653	-0.533843		-0.721134	1.63786	-0.566262	0.280457	-0.630923
NPAS2	neuronal PAS domain protein 2 [Source:NCBI gene;Acc:395433]	7	6	1	1	0.62166	0.0590911	1.75562	0.743026	2.01343		17.3073	28.5154	19.1539	23.8715	16.5119	NPAS2	-0.508852	-1.19549	0.875201	-0.360719	1.18986		-0.745928	1.47482	-0.380047	0.554691	-0.903536
PPARD	peroxisome proliferator activated receptor delta [Source:NCBI gene;Acc:395479]	8	7	1	1	28.1747	53.4097	32.6943	58.8935	44.0729		42.1866	48.5146	47.6897	43.566	43.3711	PPARD	-1.16541	0.759989	-0.820575	1.1784	0.0476031		-1.01486	1.21579	0.925023	-0.528624	-0.597327
TSC22D2	TSC22 domain family member 2 [Source:NCBI gene;Acc:100859827]	8	7	1	1	45.9577	44.3289	46.7024	45.6453	49.9029		28.8392	31.6156	27.6548	29.4084	31.4543	TSC22D2	-0.263879	-1.04578	0.0935838	-0.413859	1.62993		-0.558272	1.06431	-1.25047	-0.225615	0.970048
BARX2	BARX homeobox 2 [Source:NCBI gene;Acc:395714]	10	9	1	1	3.37331	206.251	3.6707	146.175	225.033		170.105	188.249	247.191	202.514	239.56	BARX2	-1.05587	0.831008	-1.0531	0.272271	1.00569		-1.19168	-0.643183	1.13876	-0.211923	0.908032
BAZ2A	#N/A	10	9	1	1	22.3159	46.1023	31.479	55.8192	62.0374		23.1757	25.4776	23.5583	27.0165	28.628	BAZ2A	-1.28318	0.154181	-0.729473	0.741359	1.11711		-1.03975	-0.0406381	-0.873721	0.627332	1.32678
GATAD2A	GATA zinc finger domain containing 2A [Source:NCBI gene;Acc:420109]	10	9	1	1	61.0466	91.8027	73.6841	104.498	107.163		45.257	45.8831	43.0813	54.0414	53.4388	GATAD2A	-1.33604	0.209205	-0.701112	0.847025	0.980925		-0.611494	-0.487321	-1.04298	1.13065	1.01115
ZBTB17	zinc finger and BTB domain containing 17 [Source:NCBI gene;Acc:396541]	10	9	1	1	19.4932	31.225	21.7368	27.5735	40.8582		20.0892	21.0773	19.4527	22.4045	22.1573	ZBTB17	-1.02459	0.359577	-0.759887	-0.0712411	1.49614		-0.74088	0.0321383	-1.23886	1.07053	0.877072
ZNF302	zinc finger protein 302 [Source:NCBI gene;Acc:417303]	10	9	1	1	9.59874	13.4647	11.7217	15.0822	17.1633		9.85796	10.2524	10.1099	9.9573	10.2664	ZNF302	-1.30092	0.0200031	-0.575525	0.572684	1.28375		-1.28374	0.909734	0.117457	-0.731287	0.987836
ARNTL2	aryl hydrocarbon receptor nuclear translocator-like 2 [Source:NCBI gene;Acc:373925]	11	10	1	1	36.8744	32.2183	21.5609	40.7178	52.3865		38.4893	40.4239	49.3405	56.1127	65.584	ARNTL2	0.0108607	-0.400885	-1.34333	0.350737	1.38262		-1.0237	-0.851499	-0.057818	0.544982	1.38803
CSRNP3	cysteine and serine rich nuclear protein 3 [Source:NCBI gene;Acc:772101]	11	10	1	1	1.76629	0.372549	1.48195	5.80385	5.85927		0.559863	0.488406	0.472388	0.771858	1.40784	CSRNP3	-0.499017	-1.03796	-0.60897	1.06226	1.08369		-0.459813	-0.642141	-0.683014	0.0811082	1.70386
GRHL3	grainyhead like transcription factor 3 [Source:NCBI gene;Acc:419695]	11	10	1	1	9.26109	74.6517	10.7713	153.844	165.728		15.8552	15.7659	23.0604	52.5942	65.4904	GRHL3	-0.979314	-0.109118	-0.959217	0.944746	1.1029		-0.812717	-0.816599	-0.49954	0.78416	1.3447
HOXD3	homeobox D3 [Source:NCBI gene;Acc:431212]	11	10	1	1	8.82557	100.815	10.9915	57.823	84.1763		13.0254	12.5165	13.8945	21.6368	25.2584	HOXD3	-1.04491	1.15462	-0.99312	0.126644	0.756767		-0.730295	-0.817933	-0.580641	0.752608	1.37626
HOXD4	homeobox D4 [Source:NCBI gene;Acc:424139]	11	10	1	1	4.75671	68.5282	4.23432	27.6173	40.374		3.38526	2.98373	4.53905	6.95566	7.24303	HOXD4	-0.90498	1.46557	-0.924398	-0.0551948	0.419005		-0.824805	-1.02723	-0.243141	0.975151	1.12003
ZBED4	zinc finger BED-type containing 4 [Source:NCBI gene;Acc:417734]	11	10	1	1	49.7521	53.1254	37.7376	48.0909	56.632		25.0425	28.051	30.3678	32.4459	38.274	ZBED4	0.0959769	0.568932	-1.58856	-0.136937	1.06059		-1.16192	-0.558571	-0.0939379	0.322813	1.49161
HOXB9	homeobox B9 [Source:NCBI gene;Acc:771865]	2	2	0	0	87.9805	8.35717	59.0658	7.554	5.0258		15.259	12.1887	12.7729	11.5554	9.57983	HOXB9	1.43591	-0.666403	0.672466	-0.687609	-0.754362		1.45183	-0.0400726	0.243798	-0.347817	-1.30774
PLEK	pleckstrin [Source:NCBI gene;Acc:395669]	2	2	0	0	7.16866	2.43328	5.76956	2.0787	1.9063		22.2645	15.4116	17.2849	15.0753	12.4311	PLEK	1.35697	-0.59179	0.781196	-0.737712	-0.808663		1.5763	-0.295503	0.216165	-0.387367	-1.10959
AHRR	aryl-hydrocarbon receptor repressor [Source:NCBI gene;Acc:420989]	3	3	0	0	41.8064	0.309951	43.6423	0.385668	12.985		9.5963	8.92901	8.66218	6.0031	5.69204	AHRR	1.02043	-0.906014	1.10566	-0.902499	-0.317582		1.01277	0.641402	0.4929	-0.986978	-1.1601
ATOH8	atonal bHLH transcription factor 8 [Source:NCBI gene;Acc:771738]	3	3	0	0	108.886	1.61487	129.642	3.91492	22.295		31.6549	30.0994	29.4781	23.4099	20.9609	ATOH8	0.908516	-0.84383	1.24758	-0.806258	-0.506007		0.973912	0.639807	0.506366	-0.797029	-1.32306
CENPS	centromere protein S [Source:NCBI gene;Acc:771417]	3	3	0	0	105.653	75.0748	55.1699	73.4038	20.0239		44.2923	37.9077	41.7052	35.2938	32.2803	CENPS	1.26766	0.29343	-0.340754	0.240191	-1.46053		1.24407	-0.0805284	0.707323	-0.622828	-1.24803
EBF3	early B cell factor 3 [Source:NCBI gene;Acc:395175]	3	3	0	0	17.8145	0.0573331	25.9745	0.140995	4.28891		22.5784	22.6592	20.9219	16.1974	14.3185	EBF3	0.699441	-0.822765	1.39894	-0.815593	-0.460021		0.843787	0.86481	0.412831	-0.816303	-1.30512
EMX2	empty spiracles homeobox 2 [Source:NCBI gene;Acc:423923]	3	3	0	0	128.804	33.6121	127.374	30.3712	37.5153		91.058	82.1726	69.8729	55.55	49.8673	EMX2	1.10792	-0.733658	1.08025	-0.796355	-0.658147		1.23014	0.718275	0.0097218	-0.815387	-1.14275
FOXP2	forkhead box P2 [Source:NCBI gene;Acc:769935]	3	3	0	0	61.867	32.738	52.4109	20.2028	2.13679		6.17288	6.09057	6.10256	4.85445	3.56756	FOXP2	1.1618	-0.0470227	0.76938	-0.567219	-1.31694		0.714064	0.641972	0.652472	-0.440688	-1.56782
HOXC10	homeobox C10 [Source:NCBI gene;Acc:770471]	3	3	0	0	266.238	1.3111	385.089	0.644442	20.3922		62.2594	60.5267	61.468	57.5893	52.1127	HOXC10	0.73276	-0.743465	1.39503	-0.74718	-0.637141		0.839605	0.420137	0.648008	-0.290972	-1.61678
IRX1	iroquois homeobox 1 [Source:NCBI gene;Acc:374185]	3	3	0	0	370.489	163.265	347.265	106.827	23.372		52.7275	53.0156	43.1141	36.3246	32.2568	IRX1	1.10964	-0.257079	0.956468	-0.629306	-1.17972		0.982543	1.01318	-0.039728	-0.761719	-1.19427
IRX3	iroquois homeobox 3 [Source:HGNC Symbol;Acc:HGNC:14360]	3	3	0	0	180.333	120.213	80.3907	82.4498	21.9171		39.7876	36.4492	30.864	27.5959	25.2809	IRX3	1.42767	0.396943	-0.285801	-0.250499	-1.28832		1.28854	0.73649	-0.18711	-0.727554	-1.11036
KLF7	Kruppel like factor 7 [Source:NCBI gene;Acc:429011]	3	3	0	0	30.0961	10.1947	30.205	15.1341	11.9044		9.16431	7.16422	8.38661	6.74276	5.68274	KLF7	1.07211	-0.942816	1.08314	-0.442722	-0.769719		1.26634	-0.19249	0.699101	-0.499897	-1.27306
PRRX2	paired related homeobox 2 [Source:NCBI gene;Acc:396314]	3	3	0	0	175.815	0.429307	269.977	0.263038	32.0241		105.512	100.077	72.9261	67.3866	62.9552	PRRX2	0.659476	-0.78426	1.43459	-0.785629	-0.524179		1.21076	0.933564	-0.451105	-0.73361	-0.959606
SIX2	SIX homeobox 2 [Source:NCBI gene;Acc:724086]	3	3	0	0	17.6226	0.796391	18.8235	0.699029	1.26364		2.08746	2.06831	1.42502	1.37565	0.823711	SIX2	1.0308	-0.742373	1.15735	-0.752634	-0.693134		0.99949	0.963459	-0.246392	-0.339253	-1.3773
SPI1	Spi-1 proto-oncogene [Source:NCBI gene;Acc:395879]	3	3	0	0	7.28636	0.0679337	7.09623	0.16224	1.83188		33.9681	34.5789	28.7916	27.9498	20.0969	SPI1	1.10079	-0.886979	1.04843	-0.861009	-0.401233		0.838229	0.942904	-0.0489194	-0.193193	-1.53902
STAT3	signal transducer and activator of transcription 3 [Source:NCBI gene;Acc:420027]	3	3	0	0	80.757	47.5434	80.3614	46.2052	58.1073		140.258	150.391	123.315	112.414	99.3259	STAT3	1.06614	-0.883541	1.04292	-0.962094	-0.263425		0.733758	1.22561	-0.088635	-0.617726	-1.25301
TAL1	TAL bHLH transcription factor 1, erythroid differentiation factor [Source:NCBI gene;Acc:396298]	3	3	0	0	7.9907	0	7.04033	0.052116	2.5875		14.0024	14.2096	9.5893	9.42247	8.41411	TAL1	1.17375	-0.9308	0.923443	-0.917074	-0.249317		1.0428	1.11798	-0.557991	-0.618507	-0.984275
TSHZ3	teashirt zinc finger homeobox 3 [Source:NCBI gene;Acc:415762]	3	3	0	0	19.3172	10.2644	20.6954	7.06698	6.32262		10.0414	8.34448	9.86579	7.89521	7.23385	TSHZ3	0.965398	-0.362014	1.16748	-0.83086	-0.940005		1.10743	-0.26903	0.96499	-0.633463	-1.16993
VSX1	visual system homeobox 1 [Source:NCBI gene;Acc:395537]	3	3	0	0	4.34633	0.122142	5.09875	0	0.374477		4.08953	4.3331	3.19186	2.69567	2.12806	VSX1	0.93804	-0.742399	1.23737	-0.790989	-0.642017		0.864664	1.1273	-0.103278	-0.63832	-1.25037
ZBTB46	zinc finger and BTB domain containing 46 [Source:NCBI gene;Acc:419259]	3	3	0	0	28.0728	17.0896	25.2296	10.1	5.58094		23.3159	23.4857	19.9994	19.7697	16.8737	ZBTB46	1.13187	-0.0130293	0.835489	-0.741632	-1.2127		0.949816	1.01121	-0.249296	-0.332349	-1.37938
ZFP64	ZFP64 zinc finger protein [Source:NCBI gene;Acc:419342]	3	3	0	0	51.6121	34.8981	51.9264	38.43	34.1467		60.306	55.5517	57.1148	50.8059	50.1603	ZFP64	1.05936	-0.822378	1.09474	-0.424746	-0.906971		1.28542	0.177953	0.542058	-0.927518	-1.07792
ZNF277	zinc finger protein 277 [Source:NCBI gene;Acc:427859]	3	3	0	0	37.8482	31.065	24.8884	31.6393	19.71		31.8991	32.6405	30.3058	26.8976	27.4961	ZNF277	1.27037	0.29315	-0.59669	0.37589	-1.34272		0.797688	1.08601	0.178084	-1.14726	-0.914522
ZNF423	zinc finger protein 423 [Source:NCBI gene;Acc:415738]	3	3	0	0	90.8059	26.6468	125.658	15.7432	13.9607		49.1551	44.9029	44.9498	38.51	32.7878	ZNF423	0.714123	-0.550055	1.40085	-0.764897	-0.800018		1.10336	0.442002	0.449292	-0.552328	-1.44233
ZNF827	zinc finger protein 827 [Source:NCBI gene;Acc:422465]	3	3	0	0	32.0606	10.2449	28.6714	8.51948	6.06429		11.6056	10.6056	10.6746	9.30945	8.38945	ZNF827	1.22041	-0.560652	0.943717	-0.701516	-0.901961		1.17668	0.386236	0.440835	-0.638275	-1.36547
ARNT	aryl hydrocarbon receptor nuclear translocator [Source:NCBI gene;Acc:374026]	4	4	0	0	152.848	87.6659	259.87	90.9767	68.7426		83.4124	85.4987	82.225	79.5357	72.057	ARNT	0.266473	-0.567493	1.63576	-0.525133	-0.809607		0.55003	0.950343	0.322213	-0.193803	-1.62878
EPAS1	endothelial PAS domain protein 1 [Source:NCBI gene;Acc:395596]	4	4	0	0	87.6496	42.7519	142.274	21.0525	85.3896		184.788	190.576	184.944	184.083	159.566	EPAS1	0.252989	-0.707481	1.42153	-1.17168	0.204642		0.329007	0.805469	0.341812	0.270921	-1.74721
HOXB7	homeobox B7 [Source:NCBI gene;Acc:425962]	4	4	0	0	12.7445	2.97115	22.9234	5.80919	5.30612		17.8847	17.4376	18.5436	15.7168	13.8095	HOXB7	0.344172	-0.859902	1.59822	-0.510255	-0.572234		0.629963	0.396473	0.974071	-0.502195	-1.49831
HOXD9	homeobox D9 [Source:NCBI gene;Acc:771214]	4	4	0	0	19.7726	4.58183	31.505	6.41049	6.44546		9.97748	11.2558	11.2693	9.47218	7.96719	HOXD9	0.517605	-0.786445	1.52477	-0.629464	-0.626462		-0.00791579	0.919571	0.929309	-0.374526	-1.46644
IRF9	interferon regulatory factor 9 [Source:NCBI gene;Acc:395243]	4	4	0	0	1.51679	1.07954	1.32666	0.389225	0.552375		5.95203	7.05572	4.63995	4.63941	5.08909	IRF9	1.11609	0.218805	0.72591	-1.19781	-0.863004		0.461436	1.52957	-0.808385	-0.808911	-0.373713
KLF12	Kruppel-like factor 12 [Source:NCBI gene;Acc:418817]	4	4	0	0	29.4224	6.73782	85.6515	7.49763	5.04476		12.2271	12.8202	12.5273	10.3752	9.71551	KLF12	0.0742906	-0.586174	1.7114	-0.564053	-0.635468		0.497937	0.923454	0.713312	-0.830707	-1.304
LCORL	ligand dependent nuclear receptor corepressor like [Source:NCBI gene;Acc:422820]	4	4	0	0	17.9962	14.0806	17.8358	19.7013	4.24353		12.963	12.112	13.1532	10.8706	10.2288	LCORL	0.517355	-0.110843	0.491623	0.790901	-1.68904		0.854911	0.191993	1.00306	-0.77501	-1.27495
MECOM	MDS1 and EVI1 complex locus [Source:NCBI gene;Acc:424997]	4	4	0	0	8.99157	2.01704	14.654	3.29643	3.43473		9.27985	10.7475	8.73772	8.79142	7.75683	MECOM	0.473931	-0.841501	1.54189	-0.6002	-0.574117		0.19888	1.54283	-0.297554	-0.248384	-1.19577
MEF2A	myocyte enhancer factor 2A [Source:NCBI gene;Acc:395670]	4	4	0	0	58.6764	30.4199	69.594	49.5597	35.1289		58.4677	60.1698	57.8186	55.658	48.2695	MEF2A	0.615743	-1.12402	1.28794	0.0544213	-0.834085		0.513762	0.87951	0.374292	-0.0899711	-1.67759
MEIS1	Meis homeobox 1 [Source:NCBI gene;Acc:395589]	4	4	0	0	348.196	246.409	459.141	197.334	48.0814		36.8518	39.3211	38.9615	33.0833	31.2749	MEIS1	0.569034	-0.0864444	1.28348	-0.402468	-1.3636		0.266171	0.955622	0.855237	-0.786043	-1.29099
MYBL2	MYB proto-oncogene like 2 [Source:NCBI gene;Acc:396258]	4	4	0	0	101.905	77.4044	102.863	97.7197	27.6846		47.4955	44.4163	45.5193	46.8956	41.662	MYBL2	0.640895	-0.129221	0.671005	0.509329	-1.69201		0.993921	-0.338042	0.139094	0.734439	-1.52941
SMAD1	SMAD family member 1 [Source:NCBI gene;Acc:395680]	4	4	0	0	145.882	149.818	114.045	129.793	78.2745		67.6652	55.4351	68.2084	59.9713	56.5945	SMAD1	0.769184	0.904842	-0.328006	0.214725	-1.56074		1.0075	-1.01568	1.09735	-0.265277	-0.823892
TBX2	T-box 2 [Source:NCBI gene;Acc:373990]	4	4	0	0	10.8106	4.92799	11.8871	8.17859	4.04824		6.57143	7.04039	6.10044	5.40746	4.74464	TBX2	0.819092	-0.877474	1.12957	0.0600149	-1.1312		0.654801	1.16782	0.139554	-0.618538	-1.34364
ZBTB8A	zinc finger and BTB domain-containing protein 8A-like [Source:NCBI gene;Acc:112530206]	4	4	0	0	18.3091	13.3507	21.3818	10.0805	7.24391		13.897	16.2983	12.9377	12.1613	11.4639	ZBTB8A	0.730589	-0.12461	1.26057	-0.688654	-1.17789		0.290151	1.56767	-0.220209	-0.63329	-1.00432
ZFP36L1	ZFP36 ring finger protein like 1 [Source:NCBI gene;Acc:101751828]	4	4	0	0	242.157	137.067	288.607	186.856	122.706		345.025	384.072	362.299	270.724	287.798	ZFP36L1	0.666258	-0.833731	1.32926	-0.123077	-1.03871		0.308845	1.1106	0.663546	-1.21679	-0.866207
ZNF521	zinc finger protein 521 [Source:NCBI gene;Acc:421083]	4	4	0	0	47.6662	16.501	93.6983	10.3992	15.5781		31.9973	33.2249	33.455	25.031	21.1999	ZNF521	0.310888	-0.578195	1.6241	-0.752267	-0.604522		0.54322	0.764363	0.80581	-0.711645	-1.40175
ZNF710	zinc finger protein 710 [Source:NCBI gene;Acc:100858113]	4	4	0	0	17.6349	12.4524	19.762	14.9194	13.8351		17.2735	18.6797	16.7081	17.0268	15.668	ZNF710	0.648265	-1.10687	1.36862	-0.271406	-0.638605		0.185973	1.47904	-0.333866	-0.0409008	-1.29024
FOXO3	#N/A	5	5	0	0	66.3041	19.3361	46.844	25.3586	61.6241		20.7135	18.1103	22.9283	20.8143	16.8501	FOXO3	1.06479	-1.16678	0.140191	-0.880633	0.84243		0.344934	-0.736637	1.26514	0.386804	-1.26024
ID4	inhibitor of DNA binding 4, HLH protein [Source:NCBI gene;Acc:374150]	5	5	0	0	81.0856	21.9672	157.906	28.6533	97.3609		139.023	142.317	110.699	133.175	134.185	ID4	0.0664463	-0.997829	1.44941	-0.877464	0.35944		0.575815	0.84137	-1.70737	0.104362	0.185823
MIER1	MIER1 transcriptional regulator [Source:NCBI gene;Acc:424702]	5	5	0	0	48.265	40.9485	55.3128	48.6442	29.9977		36.1261	33.8718	35.9181	35.9332	33.4014	MIER1	0.377008	-0.382595	1.10871	0.416377	-1.5195		0.825405	-0.903889	0.6658	0.677406	-1.26472
NR3C1	nuclear receptor subfamily 3 group C member 1 [Source:NCBI gene;Acc:416343]	5	5	0	0	114.741	86.52	139.262	112.004	107.021		20.7942	21.3752	21.975	21.1174	18.7244	NR3C1	0.150032	-1.34531	1.44931	0.00497964	-0.259013		-0.00245144	0.467226	0.952161	0.258803	-1.67574
PLAG1	PLAG1 zinc finger [Source:NCBI gene;Acc:429484]	5	5	0	0	32.4212	29.7469	60.49	24.388	18.6734		8.40361	7.69909	9.41937	7.44384	7.55546	PLAG1	-0.0446918	-0.210075	1.69112	-0.541476	-0.894874		0.362957	-0.491298	1.5946	-0.800806	-0.665458
SMARCC2	#N/A	5	5	0	0	87.4846	92.173	124.645	91.737	71.1928		33.6725	32.4245	31.0365	34.6061	28.721	SMARCC2	-0.306985	-0.0655784	1.60646	-0.0880264	-1.14587		0.683153	0.143673	-0.456321	1.08671	-1.45722
TCF7L2	transcription factor 7-like 2 (T-cell specific, HMG-box) [Source:NCBI gene;Acc:395508]	5	5	0	0	44.3019	61.0783	302.284	72.4831	33.2902		15.3346	16.1852	15.6063	17.7849	12.0611	TCF7L2	-0.518562	-0.36956	1.77275	-0.268266	-0.616364		-0.0285952	0.378087	0.101298	1.14288	-1.59367
ZBTB38	zinc finger and BTB domain containing 38 [Source:NCBI gene;Acc:424783]	5	5	0	0	20.9739	14.2338	29.3654	22.3197	18.9549		30.1229	30.8391	34.6935	29.9698	27.1582	ZBTB38	-0.0354931	-1.25823	1.48683	0.208654	-0.401762		-0.160348	0.1044	1.52912	-0.216935	-1.25623
ZNF292	zinc finger protein 292 [Source:NCBI gene;Acc:421828]	5	5	0	0	34.7055	37.9944	46.0712	36.0939	9.61793		14.3363	13.5232	15.5458	12.7603	13.0663	ZNF292	0.131672	0.371066	0.95898	0.232733	-1.69445		0.437298	-0.288493	1.5169	-0.969393	-0.696308
ZNF618	zinc finger protein 618 [Source:NCBI gene;Acc:770984]	5	5	0	0	28.7827	21.4219	43.3003	30.811	8.19812		19.2235	22.3068	20.2	17.6551	17.9261	ZNF618	0.176583	-0.393526	1.30101	0.333679	-1.41774		-0.126223	1.50344	0.38994	-0.95519	-0.811968
GMEB1	glucocorticoid modulatory element binding protein 1 [Source:NCBI gene;Acc:769918]	6	6	0	0	24.702	25.9927	35.7549	29.3168	21.7415		16.732	18.5322	17.2493	18.0067	16.1384	GMEB1	-0.522794	-0.281775	1.54123	0.338978	-1.07564		-0.624606	1.25037	-0.0858721	0.70302	-1.24291
NR2C2	nuclear receptor subfamily 2 group C member 2 [Source:NCBI gene;Acc:395253]	6	6	0	0	20.4169	28.8786	25.8223	20.5963	11.4875		15.2883	10.4495	28.896	10.7363	11.0671	NR2C2	-0.154577	1.12345	0.661838	-0.127479	-1.50323		0.000110229	-0.615507	1.73135	-0.579025	-0.536932
TBX3	T-box 3 [Source:NCBI gene;Acc:374202]	6	6	0	0	3.01668	0.651805	6.33388	0.967063	7.02404		13.7944	16.4767	17.6621	15.2938	14.0402	TBX3	-0.1963	-0.993924	0.92252	-0.887594	1.1553		-1.01434	0.625631	1.35039	-0.0976079	-0.864068
ZBTB37	zinc finger and BTB domain containing 37 [Source:NCBI gene;Acc:429073]	6	6	0	0	43.2829	37.6313	50.7002	39.7693	48.5693		16.6998	9.13761	25.0723	6.21754	16.9478	ZBTB37	-0.126724	-1.13876	1.20148	-0.755901	0.8199		0.254455	-0.766478	1.38478	-1.1607	0.28794
ZBTB39	zinc finger and BTB domain containing 39 [Source:NCBI gene;Acc:100858734]	6	6	0	0	20.4901	28.7417	18.7611	26.9807	12.8957		10.8333	9.77329	11.6433	10.0775	10.8847	ZBTB39	-0.168744	1.116	-0.437935	0.841824	-1.35115		0.259051	-1.1796	1.35848	-0.766724	0.328789
NFAT5	nuclear factor of activated T-cells 5 [Source:NCBI gene;Acc:415866]	7	7	0	0	58.3876	138.037	90.1316	107.238	49.151		38.2872	36.0054	35.5614	34.0133	39.526	NFAT5	-0.83263	1.36323	0.0425266	0.514148	-1.08728		0.728518	-0.304925	-0.50599	-1.20717	1.28957
PIAS4	protein inhibitor of activated STAT 4 [Source:NCBI gene;Acc:420095]	7	7	0	0	23.0801	27.83	18.9852	27.5785	19.9924		12.0087	15.3353	12.1573	13.5397	13.1996	PIAS4	-0.100018	1.04993	-1.09139	0.989031	-0.84755		-0.925771	1.55897	-0.814752	0.217776	-0.0362233
FOSL2	FOS like 2, AP-1 transcription factor subunit [Source:NCBI gene;Acc:421416]	8	8	0	0	6.39321	2.17627	49.4008	33.2689	618.297		53.795	62.8087	63.4202	55.9285	62.2188	FOSL2	-0.507508	-0.5233	-0.346442	-0.406857	1.78411		-1.3146	0.714669	0.852334	-0.834281	0.581877
OTX5	orthodenticle-related homeobox 5 [Source:NCBI gene;Acc:103875463]	8	8	0	0	0.953654	1.39797	1.59587	3.60159	1.16202		0.917074	1.01307	1.78604	1.01261	1.39235	OTX5	-0.738912	-0.322573	-0.137136	1.74229	-0.543669		-0.845724	-0.581421	1.54691	-0.582661	0.462894
ZBTB45	zinc finger and BTB domain containing 45 [Source:NCBI gene;Acc:776930]	8	8	0	0	8.57459	8.02449	9.54188	8.72901	11.0325		7.53059	7.01969	7.08379	6.73184	7.58268	ZBTB45	-0.518231	-0.988739	0.309095	-0.386161	1.58404		0.945056	-0.47139	-0.293689	-1.26944	1.08946
ZFAT	zinc finger and AT-hook domain containing [Source:NCBI gene;Acc:420319]	8	8	0	0	8.83141	11.0211	10.706	12.2495	9.90254		6.84015	6.64277	7.80631	7.12697	7.86472	ZFAT	-1.34126	0.375553	0.128503	1.33866	-0.501462		-0.747523	-1.10216	0.988445	-0.23216	1.0934
GMEB2	glucocorticoid modulatory element binding protein 2 [Source:NCBI gene;Acc:419264]	9	9	0	0	11.6201	14.7908	18.1744	16.9497	21.5329		17.4671	18.5146	17.3761	18.5576	18.2576	GMEB2	-1.34657	-0.491539	0.420907	0.0906362	1.32656		-0.991944	0.838981	-1.15091	0.914168	0.389703
ID3	inhibitor of DNA binding 3, HLH protein [Source:NCBI gene;Acc:395281]	9	9	0	0	222.334	143.149	348.952	502.611	758.688		130.737	146.108	128.426	230.298	270.001	ID3	-0.706668	-1.03047	-0.188898	0.439443	1.48659		-0.775968	-0.539202	-0.811565	0.757596	1.36914
MITF	melanogenesis associated transcription factor [Source:NCBI gene;Acc:395886]	9	9	0	0	9.05424	53.6003	13.6145	62.791	52.0973		23.854	23.2949	32.8773	33.9347	36.2369	MITF	-1.16968	0.616116	-0.986864	0.984563	0.555865		-1.02601	-1.11875	0.4707	0.646093	1.02796
MYCL	v-myc avian myelocytomatosis viral oncogene lung carcinoma derived homolog [Source:NCBI gene;Acc:428231]	9	9	0	0	23.1567	138.484	19.7597	103.984	72.0907		39.8623	42.5514	38.4949	43.6215	51.0237	MYCL	-0.940938	1.30398	-1.00706	0.632427	0.0115959		-0.666402	-0.114745	-0.946924	0.104773	1.6233
TCF25	transcription factor 25 [Source:NCBI gene;Acc:425450]	9	9	0	0	66.5796	84.4181	63.6707	73.6896	128.414		52.8631	54.9009	51.6075	57.3236	58.7	TCF25	-0.634735	0.0402452	-0.744805	-0.365702	1.705		-0.747585	-0.0601118	-1.17119	0.75726	1.22163
ZBTB48	zinc finger and BTB domain containing 48 [Source:NCBI gene;Acc:419370]	9	9	0	0	13.5202	18.3741	15.0555	19.0417	18.5208		16.3563	17.4923	16.5012	17.64	17.5959	ZBTB48	-1.37474	0.598161	-0.750707	0.869507	0.657783		-1.20243	0.592872	-0.97336	0.826292	0.756624
ZNF142	zinc finger protein 142 [Source:NCBI gene;Acc:424213]	9	9	0	0	10.7844	16.2463	12.2914	14.6528	13.7961		6.99275	7.17958	6.77753	7.74216	8.07819	ZNF142	-1.31379	1.27692	-0.598952	0.52109	0.114727		-0.668498	-0.322805	-1.06672	0.718125	1.3399
ZNF687	zinc finger protein 687 [Source:NCBI gene;Acc:429831]	9	9	0	0	16.4125	30.9735	24.0882	34.8098	29.8404		10.0468	10.967	10.0818	12.5622	11.3317	ZNF687	-1.50971	0.523415	-0.437973	1.05907	0.365202		-0.916987	-0.0297919	-0.883211	1.50819	0.321803
DACH1	dachshund family transcription factor 1 [Source:NCBI gene;Acc:373935]	10	10	0	0	5.05083	14.0493	9.32833	41.3973	58.7167		2.24758	2.80957	3.44663	3.8563	3.80426	DACH1	-0.887596	-0.50096	-0.703804	0.6741	1.41826		-1.42555	-0.612442	0.309277	0.902003	0.826713
FOXI3	#N/A	10	10	0	0	0.10723	7.75115	0.414403	45.1831	83.5164		0.956089	3.77497	9.81661	42.015	47.4207	FOXI3	-0.747912	-0.538401	-0.739493	0.487567	1.53824		-0.89562	-0.768373	-0.495649	0.957814	1.20183
GATA3	GATA binding protein 3 [Source:NCBI gene;Acc:419106]	10	10	0	0	2.00931	138.848	6.85053	817.773	668.891		57.5851	63.5359	77.9252	107.908	112.788	GATA3	-0.837917	-0.484971	-0.82543	1.26616	0.882154		-1.04338	-0.807861	-0.238381	0.948236	1.14138
IRF6	interferon regulatory factor 6 [Source:NCBI gene;Acc:419863]	10	10	0	0	2.8259	139.605	1.27248	209.913	216.942		121.124	119.458	134.966	180.082	196.538	IRF6	-1.04321	0.238976	-1.05777	0.898061	0.963949		-0.823875	-0.870705	-0.434781	0.8334	1.29596
KLF11	Kruppel like factor 11 [Source:NCBI gene;Acc:421934]	10	10	0	0	17.2738	15.9716	23.7186	40.402	34.6948		22.1778	23.3624	23.8491	27.6347	29.1899	KLF11	-0.848394	-0.969293	-0.250064	1.2988	0.768951		-1.01921	-0.625297	-0.463435	0.795397	1.31255
MKX	mohawk homeobox [Source:NCBI gene;Acc:771284]	10	10	0	0	0.125159	0.0217332	0.134868	0.978584	1.63087		3.17678	3.43753	4.87785	5.09135	4.96055	MKX	-0.644008	-0.791015	-0.630206	0.569038	1.49619		-1.22758	-0.944822	0.617067	0.848587	0.706747
MLX	MLX, MAX dimerization protein [Source:NCBI gene;Acc:420026]	10	10	0	0	82.147	82.8413	80.4382	92.3567	90.8072		101.365	102.301	102.9	104.741	108.982	MLX	-0.65506	-0.527699	-0.96852	1.21776	0.933518		-0.892703	-0.582462	-0.383845	0.226468	1.63254
MYC	v-myc avian myelocytomatosis viral oncogene homolog [Source:NCBI gene;Acc:420332]	10	10	0	0	14.5464	34.5743	43.6299	124.126	98.4005		42.75	46.8547	48.042	54.2084	62.9673	MYC	-1.05104	-0.617097	-0.42089	1.32321	0.76582		-1.0443	-0.522474	-0.371523	0.412393	1.5259
NCOA1	nuclear receptor coactivator 1 [Source:NCBI gene;Acc:422016]	10	10	0	0	45.1658	77.2033	144.66	155.506	157.241		35.2412	35.648	36.6356	41.4756	42.6641	NCOA1	-1.37477	-0.752584	0.557456	0.768098	0.801802		-0.889876	-0.772775	-0.488522	0.904542	1.24663
RFX5	regulatory factor X5 [Source:HGNC Symbol;Acc:HGNC:9986]	10	10	0	0	12.9586	24.8011	24.8348	21.1232	24.3172		15.6382	17.4323	17.952	21.5328	20.7919	RFX5	-1.70434	0.629461	0.636114	-0.0953355	0.534103		-1.23912	-0.505714	-0.293281	1.17049	0.867631
SOX21	SRY-box 21 [Source:NCBI gene;Acc:107051027]	10	10	0	0	6.33969	176.408	4.4697	275.836	276.022		37.9604	56.9638	100.666	210.182	242.728	SOX21	-1.03869	0.209923	-1.05242	0.939914	0.941282		-0.997962	-0.791239	-0.315836	0.8755	1.22954
SREBF2	sterol regulatory element binding transcription factor 2 [Source:NCBI gene;Acc:395304]	10	10	0	0	67.3787	95.8572	51.1507	102.662	158.267		84.5915	94.0362	120.982	127.16	129.007	SREBF2	-0.674038	0.0193325	-1.06914	0.18502	1.53883		-1.30002	-0.837803	0.480912	0.783258	0.873652
TFAP2E	transcription factor AP-2 epsilon [Source:NCBI gene;Acc:419631]	10	10	0	0	1.60436	104.823	0.945377	54.4684	244.874		8.49269	9.56978	12.118	26.0147	34.7323	TFAP2E	-0.789164	0.232379	-0.795686	-0.265974	1.61844		-0.834156	-0.741463	-0.52216	0.673773	1.42401
ZNF518A	zinc finger protein 518A [Source:NCBI gene;Acc:428964]	10	10	0	0	16.8228	19.4847	13.4708	20.5553	28.0182		12.1969	12.2823	13.6761	14.9793	17.242	ZNF518A	-0.526414	-0.0343278	-1.14606	0.163597	1.54321		-0.891754	-0.85123	-0.189529	0.429154	1.50336
